# Supplementary material for: Proteomic and Metabolomic Profiling of Deinococcus radiodurans Recovering After Exposure to Simulated Low Earth Orbit Vacuum Conditions
Source: Front Microbiol. 2019 Apr 29;10:909. doi: 10.3389/fmicb.2019.00909 (PMC6501615; doi:10.3389/fmicb.2019.00909)
Supplement: Supplementary file 2 [file Table_2.XLSX]

## Sheet: z-scored
Table S2: Table of identified untargeted metabolites with the calculated ANOVA q-value and Post-Hoc test. Furthermore, the library which was responsible for the hit (NIST – National Institute of Standards and Technology and GMD – Golm Metabolome Database) and the corresponding similarity (between library hit and measurement 1-999) is shown. Intensities are already normalized to the internal stand…
Metabolite	ANOVA (q-value)	Post-Hoc	3h C1	3h C2	3h C3	3h C4	6h C1	6h C2	6h C3	6h C4	3h V1	3h V2	3h V3	3h V4	6h V1	6h V2	6h V3	6h V4	Database	Similarity
Alanyl-alanine (2TMS)	0	3h V_6h V;3h C_6h V;6h C_6h V;6h C_3h V;6h C_3h C	0.5283	0.197962	0.0455351	-0.169374	1.83399	1.39234	1.3881	0.650291	0.240107	-0.111344	-0.484001	-0.596427	-1.14029	-1.04635	-1.03227	-1.69658	GMD	887
beta-Alanine (3TMS)	0	6h C_3h V;6h C_3h C;6h C_6h V	-0.593787	-0.619817	-0.597589	0.368866	1.98141	1.57913	1.71505	0.983583	-0.843767	-0.851218	-0.860532	-0.85373	-0.322489	-0.40075	-0.206294	-0.478069	NIST	881
Butanoic acid, 4-amino- (3TMS)	0	3h C_3h V;6h C_3h V;3h C_6h V;6h C_6h V;6h C_3h C	0.360948	-0.0346255	0.126064	0.285391	2.05256	1.37041	1.60057	0.640266	-0.851333	-0.993545	-0.967558	-1.06756	-0.458743	-0.30765	-0.683782	-1.07143	GMD	886
Citric acid (4TMS)	0	6h V_6h C;3h V_6h C;6h V_3h C;3h V_3h C;3h V_6h V	-0.468625	-0.64275	-0.795107	-0.894186	-0.783753	-1.0198	-0.950775	-0.993786	1.85908	1.24938	1.58761	1.18511	0.0820473	0.52133	0.321061	-0.256832	NIST	768
Dihydroxyacetone phosphate (1MEOX) (3TMS)	0	6h C_6h V;6h C_3h V;6h C_3h C	-0.458062	-0.448555	-0.0533487	-0.605974	1.81344	1.05796	2.40949	0.838339	-0.0349101	-0.500584	-0.728284	-0.819677	-0.805272	-0.603133	-0.161248	-0.900181	GMD	899
Glucose-6-phosphate (1MEOX) (6TMS) BP	0	6h C_6h V;6h C_3h C;6h C_3h V	-0.417949	-0.957287	-0.512784	-0.361505	1.91906	1.70977	1.73244	0.841051	-0.154074	-0.197707	-0.798761	-0.197648	-0.853537	0.0746499	-0.739983	-1.08575	GMD	884
Glycyl-proline (3TMS)	0	6h C_3h V;6h C_6h V;6h C_3h C	-0.447206	-0.506279	-0.487299	-0.104401	2.03172	1.51132	1.7812	1.2284	-0.690337	-0.703704	-0.692858	-0.719297	-0.525092	-0.469817	-0.538288	-0.668064	GMD	892
Homoserine (3TMS)	0	3h C_3h V;6h C_3h V;3h C_6h V;6h C_6h V	0.755312	0.574893	0.946155	0.367925	1.69076	1.21603	1.29226	0.27674	-0.748788	-0.891166	-0.994469	-1.14011	-0.823404	-0.278926	-0.93587	-1.30735	GMD_pred	898
Phenylalanine (2TMS)	0	3h C_6h V;6h C_6h V;3h C_3h V;6h C_3h V	0.998849	0.0487749	0.844203	0.614246	1.04545	1.36139	1.60479	0.609833	-0.485315	-0.528631	-0.876547	-0.994845	-1.18108	-1.09954	-0.652558	-1.30903	NIST	914
Proline [+CO2] (2TMS)	0	6h C_3h V;3h C_3h V;6h C_6h V;3h C_6h V	1.66304	0.190149	1.17852	1.61213	0.567621	0.516089	0.975751	0.240205	-0.951015	-1.06439	-0.41713	-1.04657	-0.423327	-0.937017	-0.920588	-1.18347	GMD	886
Ribose	0	6h C_6h V;6h C_3h V;6h C_3h C	0.0104507	-0.612091	0.366956	-0.0378185	1.91139	1.4944	1.91877	0.618442	-0.177359	-0.570581	-0.804996	-0.766834	-0.853665	-0.800782	-0.586789	-1.10949	mainlib	915
Tyrosine (3TMS)	0	3h C_3h V;6h C_3h V;3h C_6h V;6h C_6h V;6h C_3h C	0.838847	0.206459	0.814992	0.519919	1.4758	1.15163	1.49217	0.77976	-0.85184	-0.932419	-1.03939	-1.20022	-0.827486	-0.549905	-0.701198	-1.17713	GMD_pred	889
Unknown 32	0	3h V_6h C;3h C_6h C;3h C_6h V	1.99533	1.18625	1.4296	0.401798	-1.03782	-1.15891	-1.0831	-1.20783	0.971846	0.0511649	0.158432	-0.134366	-0.134526	-0.10909	-0.189475	-1.1393	GMD_pred	889
Maltose (1MEOX) (8TMS) BP	0.00016	6h C_3h C;6h C_3h V;6h C_6h V	-0.22109	-0.831675	-0.449262	-0.493322	2.50416	1.63561	1.2371	0.478824	-0.165925	-0.459812	-0.941729	-0.402805	-0.34755	0.17357	-0.544178	-1.17192	GMD_pred	920
Unknown 28	0.000166667	3h V_6h V;3h C_6h V;6h C_6h V	0.908176	-0.642463	0.319841	0.903244	1.57023	0.903481	0.631041	0.474694	0.0781717	-0.26568	0.917053	-0.243674	-1.55267	-1.05875	-1.24734	-1.69536	GMD_pred	724
Nicotinamide (1TMS)	0.000173913	3h V_6h C;3h V_6h V;3h V_3h C	0.639846	-0.0603587	-0.23594	-0.702635	-0.733133	-0.989799	-0.807528	-1.41071	1.21927	0.76926	1.98205	1.53172	-0.173815	-0.0536974	0.225889	-1.20042	GMD	840
Valine, N-methyl-N-methoxycarbonyl-, octyl ester	0.000181818	3h C_6h V;6h C_6h V;6h C_3h V	0.488573	0.368907	0.466713	-0.0577682	1.50162	1.3984	2.08686	0.10147	-0.635268	-0.760685	-0.40173	-1.07608	-0.840547	-0.481736	-0.72002	-1.43869	mainlib	795
Unknown 17	0.0004	3h V_6h V;3h C_6h V;3h C_6h C	0.881248	0.732695	1.75446	1.10115	-0.13537	-0.0797927	-0.273136	-1.25678	0.397641	0.314433	0.744034	0.176884	0.170425	-1.54348	-1.56459	-1.41983	GMD_pred	766
Glyceryl-glycoside (TMS) ether	0.000685714	3h V_6h V;6h C_6h V;6h C_3h C	0.522943	-0.869858	-0.0483262	-0.277233	1.61234	1.21681	1.15656	0.677004	0.942059	0.25843	-0.0217061	-0.609167	-2.12487	-0.982803	-0.449271	-1.00291	NIST	850
Malic acid (3TMS)	0.00153846	6h C_6h V;3h C_6h V;3h C_3h V	1.50806	1.1958	0.96724	0.39344	1.34462	0.286787	0.94768	-0.312725	0.167146	-0.738958	-1.06559	-1.07297	-0.626465	-0.619082	-0.530776	-1.84422	GMD_pred	890
Benzothiazole, 2-(2-hydroxyethylthio)-	0.00157895	3h C_6h V;3h V_6h V	1.05373	0.467683	0.684935	0.0319565	-0.151204	-0.377963	-0.212685	-0.595795	1.07261	0.626067	1.48217	0.555975	0.387205	-1.57918	-1.66372	-1.78179	mainlib	741
Unknown 13	0.0022	3h C_6h V;3h V_6h V	0.931122	0.32771	0.79526	0.0795686	0.00699107	-0.309047	-0.14708	-0.466993	0.95076	0.615085	1.49051	0.513737	0.432204	-1.65126	-1.74576	-1.82282	GMD_pred	792
Pentanedioic acid, 2-(methoxyimino)-, bis(TMS) ester	0.00234146	3h C_3h V;3h C_6h V;3h C_6h C	2.36414	1.68353	0.807572	0.50016	0.0960751	-0.610323	0.212274	-0.46277	-0.119797	-0.753539	-1.22853	-0.841348	0.380613	-0.70895	-0.0610093	-1.25809	NIST	846
Fumaric acid (2TMS)	0.003	3h C_6h V;6h C_6h V;3h C_3h V;6h C_3h V	1.72825	1.12387	0.520325	-0.307956	1.28847	0.6501	0.716429	0.563896	-0.313788	-0.957328	-0.564677	-1.0527	-0.20243	-0.221867	-0.972453	-1.99815	mainlib	905
Methionine (2TMS)	0.00321739	6h C_3h V;6h C_6h V	0.779172	-0.205719	0.748635	-0.345593	1.67578	0.929093	1.27471	0.721441	-0.770113	-0.862514	-0.462488	-1.4941	-0.761997	0.925824	-0.677945	-1.47419	NIST	861
Uridine 5'-monophosphate (5TMS)	0.00456	3h V_6h C;6h V_6h C	-0.898503	0.274429	-0.576002	0.0737366	-0.911896	-1.24842	-0.957608	-1.36887	1.19631	0.958316	0.0892939	0.471096	-0.55449	1.77691	1.59644	0.0792503	GMD	898
Thymidine-5'-monophosphoric-acid (3TMS)	0.00457143	6h C_6h V;6h C_3h C	-0.203664	-0.5326	-0.30698	-0.313169	2.29783	0.758666	1.58558	0.406578	0.59579	-0.293201	-0.235831	-0.650016	-1.18336	0.440271	-0.619194	-1.7467	GMD	740
Benzenepropanoic acid, alpha-(methoxyimino)-4-[(TMS)oxy]-, TMS ester	0.00530769	6h C_6h V;3h C_6h V	1.40299	1.72013	0.156254	-0.0881135	1.5712	0.302288	0.628692	-0.428699	0.295633	-0.323446	-0.595108	-0.060457	-0.651669	-1.00544	-0.896238	-2.02802	NIST	781
Unknown 4	0.00651852	6h V_6h C;3h V_6h C	-0.218544	-0.294555	-0.1436	-0.401894	-1.57474	-0.868327	-0.860341	-0.975411	1.24129	-0.831538	2.10736	0.949933	0.241431	1.44397	0.197077	-0.0121143	GMD	876
Cadaverine (4TMS)	0.0114	6h V_6h C	0.00815271	0.1421	-1.0732	-0.73727	-0.184977	-1.23633	-0.744583	-1.47651	0.970473	-0.048672	0.589556	0.338439	1.24636	2.29912	0.560826	-0.653476	NIST	817
Mannose, 2,3,4,5-tetrakis-O-(TMS)-, O-methyloxime, 6-[bis(TMS) phosphate]	0.0123871	6h C_6h V	-0.208336	-1.07372	0.225324	-0.149518	1.94738	1.65433	1.62605	-0.698944	0.191963	-0.120721	-0.340969	-0.100314	-1.0105	0.279176	-0.7073	-1.51389	NIST	720
Spermidine (5TMS)	0.0125	3h C_6h C	2.75293	0.119273	1.14846	-0.389212	-0.535064	-0.979554	-0.872466	-1.2308	0.513013	0.0201186	0.810344	0.0898762	-0.403249	0.13166	-0.0327734	-1.14256	GMD_pred	888
Ornithine (4TMS)	0.0125538	3h C_6h V	1.65544	0.198735	1.71267	0.000188578	0.0166042	-0.316398	-0.211828	-1.13044	0.823855	0.251466	1.25957	-0.743785	-1.17772	0.0483216	-0.583217	-1.80346	NIST	858
Putrescine (4TMS)	0.0141818		1.18209	0.889895	-0.0231634	-0.393037	-0.490859	-1.49821	-1.09492	-1.61469	1.10155	-0.0622457	0.23179	0.323633	0.939331	1.5836	0.176993	-1.25176	GMD_pred	793
Unknown 1	0.0168955	6h V_3h C	-0.97416	-1.2868	-0.783787	-0.652392	0.234489	0.353848	0.471885	-0.972653	0.464391	0.0906859	-0.366548	-0.419945	0.585101	2.39917	1.6544	-0.797691	GMD	911
Glycine (3TMS)	0.0212394	3h V_6h V	0.57548	-0.223339	0.176808	-0.243779	0.22819	-0.533049	-0.443452	0.933882	0.630087	2.69299	0.789113	-0.676134	-0.929672	-0.574842	-0.804909	-1.59737	GMD_pred	770
Ornithine, N2-acetyl- (3TMS)	0.0218333	6h C_3h V	0.515393	0.10228	-0.715148	-0.485105	2.84277	0.160016	0.939434	0.337769	-0.222589	-1.03481	-0.966521	-0.491944	0.0743272	0.575191	-0.140822	-1.49024	GMD_pred	716
2-Ethylhexanal ethylene glycol acetal	0.0268493		0.870017	0.228987	0.484113	-0.481984	0.62851	0.178918	0.469175	-0.087588	-1.44708	-1.06758	-0.169318	-1.65364	0.209669	2.59366	-0.465789	-0.290069	mainlib	812
Threonine (3TMS)	0.0273684		1.7264	0.709565	1.30244	0.290721	0.960223	-0.407933	-0.149982	-0.996003	0.316222	-0.567342	0.784846	-1.07961	-0.455712	0.481622	-0.849758	-2.0657	NIST	929
Uridine (4TMS)	0.0378765		0.681338	-0.189333	0.912278	-0.34373	1.64742	0.788702	1.3028	-0.303748	0.077715	-0.55157	-0.661428	-1.22195	-0.65479	0.886105	-0.14541	-2.2244	GMD_pred	820
5'-Methylthioadenosine (3TMS)	0.03795		0.375187	-0.33916	-0.417447	-1.16918	0.261513	-0.640808	-0.434601	-2.03401	1.35363	0.610953	1.11143	0.339811	0.198214	1.89361	-0.00622282	-1.10292	NIST	773
Glucose-6-phosphate (1MEOX) (6TMS) MP	0.0393253		-0.12271	-1.08168	0.357939	-0.0574049	2.26754	1.94269	0.175837	-0.665739	0.320885	-0.0255946	-0.269721	-0.00293347	-1.01156	0.417527	-0.675613	-1.56946	GMD_pred	734
Lysine (4TMS)	0.055907		1.52127	0.0162724	1.57745	-0.116294	0.0672481	-0.264497	-0.208791	-1.20307	0.898882	0.274067	1.30551	-1.19424	-0.922207	0.519038	-0.462004	-1.80864	NIST	839
Ribulose-5-phosphate (1MEOX) (5TMS) BP	0.0580909		0.0457427	-1.05448	0.166778	-0.924861	0.780802	2.71865	0.982297	-0.818603	0.726716	-0.266897	-0.206453	-0.29083	-0.77147	0.315706	-0.0082355	-1.39486	GMD	850
Adenine (2TMS)	0.0620889		1.3901	-0.0711187	-0.624992	-0.747844	0.785447	-0.372129	-0.069672	-0.933568	1.72937	0.622003	1.40088	-0.357499	-0.54921	0.304755	-0.393852	-2.11267	mainlib	914
Adenosine (4TMS)	0.143914		1.41816	-0.328178	0.636795	-0.201519	1.50316	0.0482256	0.640273	-0.63631	0.980887	-0.106646	0.35224	-1.24238	-0.541001	0.555034	-0.709558	-2.36919	NIST	875
Leucine (2TMS)	0.176379		-0.152772	-0.543662	-0.563796	-0.526653	2.27882	0.10991	0.270681	0.201492	-0.799048	-0.764867	1.54455	-1.12681	0.0987969	1.59732	-0.747633	-0.876321	GMD_pred	884
2-Butenedioic acid (2TMS)	0.319265		0.45106	0.0473731	-0.630072	-0.934627	2.1978	0.0718454	0.00958986	-0.0742079	-0.269786	-1.00679	0.589836	-0.952056	0.905228	1.70981	-0.631793	-1.48321	NIST	894
Lumichrome (2MEOX)	0.328242		-0.160375	-0.260517	-0.360282	-0.383715	-0.112192	-0.308289	-0.327802	-0.754913	0.648377	-0.0312396	-0.133828	-0.0254468	0.0081501	3.5096	-0.312939	-0.994585	GMD	875
Adenosine-5-monophosphate (4TMS)	0.378812		-0.409021	-0.0432586	0.373804	-0.133818	1.36355	-1.16306	1.46879	-0.287326	-0.904691	-0.329454	-0.603194	-0.318942	-0.408694	2.07936	0.903778	-1.58782	GMD	912
Allantoin (4TMS)	0.456118		1.27363	0.762565	-0.385653	-1.25581	1.7591	-0.395794	0.222325	-0.55586	0.760473	-0.0738014	0.212963	-0.179011	-0.295166	0.839861	-0.251783	-2.43804	GMD_pred	762
Hexasiloxane, tetradecamethyl-	0.47741		-0.720675	2.74687	-0.704708	0.34827	0.694586	-1.78701	0.347221	-0.805015	-0.167113	-0.382944	-0.025351	-0.0442163	-0.352398	0.371683	1.05215	-0.571351	mainlib	879
Indole-3-lactic acid (3TMS)	0.518729		1.01922	0.799033	-0.598012	-0.885989	1.47542	-0.377588	0.388644	-0.189169	0.163986	-0.357157	-1.06016	-0.565448	1.76612	0.436817	0.16139	-2.1771	NIST	757
Glyceric acid-3-phosphate (4TMS)	0.798385		-0.655874	0.547725	0.0502851	-0.270328	1.86319	-0.80516	-0.270174	-0.00102018	-0.936733	-1.12893	2.25072	0.354024	0.676019	-0.347017	0.111528	-1.43825	GMD	870
Uracil (2TMS)	0.976071		1.37245	-0.695543	0.178819	-0.612572	1.23952	0.0197154	0.274549	-1.27149	0.600916	-0.371207	0.763317	-1.4194	0.391138	1.45898	-0.0271126	-1.90208	GMD	883
2,2'-Bipyrrolidine			1.50335	0.341864	1.44314	1.08068	-0.536334	0.449761	0.164601		0.110788	-0.87678		-0.695064	-1.29171		0.015272	-1.70957	mainlib	894
2-Ketoisocaproic acid (1TMS)			1.09445	0.798197	0.513248	0.138622	2.61412	-0.358099	0.00971538	-0.898178	0.00504337	-0.68544	-0.143413	-0.296647	-0.343287		-0.765746	-1.68259	mainlib	909
3-Methyl-2-oxopentanoic-acid (1MeOX) (1TMS)			2.21449	1.51651	0.535043	0.102332	0.286232	-0.562375	-0.110929	-0.93676	0.38656	-0.738373		-0.178302	-0.136324		-0.623929	-1.75418	GMD	881
4-Methoxy-2-[(TMS)oxy]phenyl 2-[(TMS)oxy]phenylmethanone			-0.843429	-0.176049	0.578649	0.106107	-0.223088	2.11108	1.60631	-0.809456	0.162524	-0.251317		-0.249965			-0.300416	-1.71095	NIST	738
7-(TMS)-2,6-bis[(TMS)oxy]-7H-purine			-0.18307	-1.03878	-0.822787	-1.10925	1.37781	1.14069	1.49425	-0.071461	1.188	0.41031	-0.0631044	-1.23456	0.0111486		0.407092	-1.50629	NIST	902
Adenosine (3TMS)			-0.209161	-0.329264	0.0557443	1.03753	1.09382		0.808309	2.49944	-0.563556	-0.53895	-0.725012	-0.718908	-0.988376	-0.581718	-0.839898		GMD	797
Alanine, N-methyl-N-(byt-3-en-1-yloxycarbonyl)-, byt-3-en-1-yl ester			1.51884	-0.0479636	0.0485196	-0.94061	-0.0378792	-1.18098	-0.8989	-1.16926	1.69078	-0.910001		0.189982	0.863829		0.873637		NIST	740
Asparagine (3TMS)			-1.4015	0.482384	-0.278499	-1.46572	0.115278	-0.00829887	0.487468	-1.02582	2.39133	0.221427			-0.282837	0.12357	0.641214		GMD	903
Benzenemethanol, 2-chloro-alpha-[[(1-methylethyl)amino]methyl]-			0.893767	1.42183	-0.381838	-0.550486	-0.614114	0.0222959	2.31028	-0.526483		-0.417652		-0.629183	-0.754335		-0.774084		NIST	744
Bernzothiazole, 2-[2-(2-fluorophenoxy)ethylthio]-			0.979264	0.360113	0.711101	-0.0983073	-0.154276	-0.447362	-0.257015	-0.74118	1.02231	0.470409	1.39918	0.407814	0.356377	-1.95167	-2.05676		mainlib	720
Butanedioic acid (2TMS)				-0.158807	1.04325	0.0491232	1.35121	-0.300427	0.0222285	-1.2411	0.920082	-0.106795	0.256058	-1.0644	0.0370984	1.70968	-0.459195	-2.05802	NIST	839
Butanoic acid, 4-methylthio-2-oxo- (1MEOX) (1TMS) MP			1.47542	1.84149	0.76878	0.535696	1.17899	0.0374754	0.551611	-0.472	-0.707099	-1.04796	-1.19413	-0.861178	-0.505474	-0.393557		-1.20806	GMD	830
Butylated Hydroxytoluene (1TMS)			1.27719	0.819561		0.205649	0.143374	-0.0649256	0.199866	-0.454727	1.02025	0.439144	1.00276	0.337516	0.25764	-1.65695	-1.74498	-1.78137	NIST	858
Carbodiimide (2TMS)			-0.27604	0.312003		-0.966887	0.39574	0.658831	-0.330616	-0.608225	0.0428647	-0.742382	2.1444	-0.923702	0.614742	1.74648	-0.678448	-1.38876	GMD_pred	818
Cyclodecasiloxane, eicosamethyl-				1.00361	-0.485103	0.897094	1.15264	-1.79473	0.905734		-0.941488	-0.611462	0.865777	-0.681458	0.742615	0.824794	-0.701126	-1.1769	mainlib	708
Cycloheptasiloxane, tetradecamethyl-			-0.87883	2.76731	-0.696229	0.455446	0.462069	-1.47678	0.40771	-0.323143	-0.674082	-0.565435	0.297889	-0.396071	-0.0643776		1.03302	-0.348499	mainlib	769
Diethylbutoxypentyloxysilane			-0.162982	-0.582956	-0.427509	-0.485961	2.27232	1.42206	1.41895		-0.439448	-0.571825	-0.636489		-0.582241	-0.577911	-0.646017		NIST	741
Ethanol, 2-butoxy-, phosphate (3:1)			1.3465	0.648526	1.06572	0.508334	-0.222973	-0.0875066	-0.0826925	-0.737642	0.19476	0.438294	0.934635	0.0499607	0.102205	-2.04448	-2.11363		mainlib	875
Etoxeridine			1.26817	0.701988	1.14095	0.592486	-1.13143	-1.19071	-1.15183	-1.33588	0.100847		0.106953			1.16047		-0.262019	mainlib	822
Glucose-6-phosphate, 2-amino-2-deoxy- (6TMS)			-0.395244	-0.480149	0.190525	-0.42646	1.56029	1.79638	1.62113	0.0584317				-0.850988	-0.797761	-0.698453	-0.721634	-0.856079	GMD_pred	899
Glutamic acid (3TMS)			1.5368	0.74294	1.35834	0.589165	-0.87195	-1.57543	-1.60357		-0.102739	-0.416286	-0.0942617	-0.700928	0.32492	1.38512	0.0368612	-0.608967	NIST	897
Glutamic acid, bis(TMS) ester			1.00167	0.749183	1.46373	0.740518	-0.634446	1.12086	1.32935	-0.834708	-0.359882	-1.0262	-1.05989	-0.900097			-0.447623	-1.14247	NIST	853
Glutamine (3TMS)			1.82704	1.15708	1.58095	0.40626	0.166806	0.23769	0.43459	-0.31291	-1.12355		-1.43377	-1.37537	-0.462741	0.125599	-0.39664	-0.831038	GMD_pred	736
Glutamine (4TMS)			1.42373	1.22767	1.79881	-0.0778878	0.41732	0.317271	0.889762	0.308621	-1.09629	-1.05071		-1.18871	-0.920364	-0.505031	-0.615507	-0.928685	GMD	880
Hexamethyldisiloxane			-0.127888		-0.0350143	-0.509724	1.87936	1.09719	1.96339	-0.0458257	-0.530995	-0.658505	-0.632738			-0.867892	-0.555883	-0.975484	NIST	879
Hexanedioic acid, bis(2-ethylhexyl) ester			0.910334	-0.0382466	0.498629	-0.417038	-0.912452	-1.28403	-1.10184	-1.49294	1.04388	0.540066	1.81751	0.365127	0.0709971				mainlib	820
Homocysteine (3TMS)			0.76677	-0.415708	-0.860752	-1.30134	1.08612	1.23037	1.40094	0.681202	1.06028	-0.371689	-0.346972	-0.0134022	-1.19641	-0.0253659	-1.69404		GMD	787
Hypoxanthine (2TMS)			2.42217	0.514339	0.275606			0.121972	0.425182	-0.0713314	0.576247	-0.637454	-1.10693		-0.570271	-0.526117		-1.42342	GMD	767
Indole-3-pyruvic acid (1MEOX) (2TMS) MP			-0.470177	-0.118995	-0.778164	-0.73128	0.0921351	-1.25268	-0.75428	-1.02638		1.42191	1.74266	1.5775	0.978175	0.442431	-0.344378	-0.77847	GMD	751
Isoleucine (2TMS)			0.696106	0.549413			0.93861	1.40917	1.66811	1.07608	-1.02465	-0.884562	-0.747934	-1.1527	-0.597202	-0.403365	-0.747966	-0.77911	NIST	804
L-Cysteine (3TMS)			0.235478		0.423373	-0.0436498	0.455993	1.19669	1.42436	-0.344407				0.518942	-0.691416	-1.73067	0.324041	-1.76873	NIST	868
Leucine (TMS)			0.532562	-0.0548156	1.39184	1.2822	-0.972138	0.869431	1.14172		-0.282672	-0.882738		-0.85783	-1.38665		-0.780914		NIST	923
Leucine, N-methyl-N-(2-methoxyethoxycarbonyl)-, dodecyl ester			1.23589	0.0806147	0.0160603	0.916016	1.70411	1.01875	0.600755	0.671743		-0.813777	-0.0733728	-1.27209	-0.917687	-0.591814	-1.08932	-1.48589	NIST	755
Proline (2TMS)			0.848332	0.187881	0.453813	-0.558022	2.2337	0.243362	0.462246	-0.0125432	-1.40558	-1.13647	0.447023	-1.71938	0.81589		-0.486	-0.374254	NIST	896
Lysine (3TMS)			0.619197	0.380922	1.19299	-0.196462	-0.338501	1.07822	1.2774	-1.54261	0.519575	-1.04816	-1.45384				-0.488728		NIST	848
Methylal			0.963937	-0.0482989	0.470681	-0.149663	0.510611	0.476799	0.528807	2.46494	-0.172347	-1.79255	-0.514228	-0.594083	-0.316851		-0.495618	-1.33213	mainlib	753
Monomethyl succinate (1TMS)				0.767688	-0.244368	-0.964043	2.25711		-0.210616	-0.190994	0.610554	-0.520593		-0.42971	0.870074		-0.352473	-1.59263	NIST	721
N-Acetyl-D-galactosamine (4TMS)			-0.126775	-0.698582	-1.04258	-0.700423	2.05262	1.55038	1.29669	0.808304	-0.597228	-0.728734	-0.615312	-0.758068	-0.100257		-0.340027		NIST	817
Ornithine-1,5-lactam (2TMS)			-0.143761	-0.801613	1.63128	-1.44613	-0.16522	-0.649165	-0.203502	-0.977874	1.50602	0.707009	1.56777		-0.488849	0.246562		-0.78254	GMD	804
Pentanoic acid, 2-(methoxyimino)-3-methyl-, TMS ester			0.681513	1.89535	0.941297	0.657983	0.429902	0.108555	0.723748	-0.0970204	-0.0712099	-1.57489		-0.143444	-1.47092		-0.867461	-1.2134	NIST	756
Phenylpyruvic acid (1MEOX) (1TMS) MP			0.932072	0.965723	0.820963	-0.690149	0.165605		-0.419138	-1.12758	1.21251	0.477662	0.550166	0.941652	-1.11457	-1.97325	-0.741671		GMD	823
Phosphoric acid (3TMS)			0.117238	-0.343117	0.439696	-0.176169	-0.9945	-0.109678	-0.203706	-1.52701	1.24479	0.352737	2.47585	0.350888	-0.715162			-0.911855	GMD_pred	820
Phosphoric acid, 3-(methoxyimino)-2-[(TMS)oxy]propyl bis(TMS) ester			1.32523	-1.78788	-1.52969		0.509278		0.626904	-0.454074	0.896764	0.429962	0.49672	-0.0322378			0.62445	-1.10543	NIST	744
Phosphoric acid, bis(TMS) 2,3-bis[(TMS)oxy]propyl ester			-0.981365	-1.35978	-0.68704	-0.92509	0.797412	0.382123	0.866283	-0.214707	-0.175383	1.52953	1.8993	0.541668	-1.20724	0.238765		-0.704477	NIST	824
Phosphoric acid, bis(TMS)monomethyl ester			0.328257	0.206382	0.204799	-0.497683	-0.268608	-0.65434	-0.233904	-1.4186	2.35095	0.765627	-0.64651	1.17053	-0.60319		0.761665	-1.46538	NIST	782
Pipecolic acid, N-ethoxycarbonyl-, ester			0.799718	0.880348	-1.24579	-2.04282	1.51072	0.278257	-0.258079	-0.166454	0.475175	-0.0937481	0.0205235	-1.15384	0.506654	1.35452	-0.865187		NIST	765
Proline (1TMS)				0.540851	1.73702	1.34242	-0.41735	0.297334	0.344804		0.287837	-0.788852		-0.590798	-1.24112		0.184358	-1.69651	GMD	840
Pyrophosphate (4TMS)			-1.19341		-0.133047	-1.25405	0.252461	0.134958	0.602855	-0.824621	2.38347	0.334156	-0.343251	0.824203	-0.137496	0.245759	0.735789	-1.62778	GMD_pred	894
Pyrrole-2-carboxylic acid (2TMS)			0.814501	0.641961	0.369769	0.31381	1.33061	1.34937	1.27173	0.515167	-1.02979	-1.20151		-1.33149	-0.475008	-0.296966	-0.989177	-1.28298	GMD	892
Succinic semialdehyde (1MEOX) (1TMS) BP			1.39706	-0.719324	-0.724676	-0.592223	-0.573769	-0.768393	-0.269784		-0.0313101	2.38304		-0.476297			-0.397484	0.773163	GMD	779
Sucrose (8TMS)			1.22824		1.09751	-1.28794	-1.3002	0.120796	-1.34144	-1.39353	0.830992	0.477305			0.431576	1.00484	0.237037	-0.105187	NIST	766
Trehalose (8TMS)			1.66617		1.37011	0.206788	0.0683429	-0.9103	-0.729343	-1.21138	0.748075	-0.0821913			-0.186686	1.15909	-0.646687	-1.45199	GMD_pred	915
Unknown 14			-0.958353	-1.22931	-0.78845	-0.91718			-0.29604	-0.809376	1.6392	1.11409	1.66412	0.749735	-0.00676124	0.791889	-0.368615	-0.584955	GMD_pred	773
Unknown 25			-0.127382		-0.666716	-1.28309	0.0804749	-0.938257	-0.758833	-0.82199	2.31946	0.636234	0.873086	0.820535	1.12214	0.161612	-0.358805	-1.05847	GMD_pred	740
Unknown 29			0.0090827	-0.0717601	-0.265516	0.0352842		2.15953	1.81601	1.13241	-0.784548	-0.838051		-0.864976	-0.563027	-0.178552	-0.734642	-0.85124	GMD_pred	719
Unknown 6			0.0390533	-0.702597	0.020738	0.0264204	2.16145	0.834306	1.40182	0.535232	-0.791754	-0.552396			-1.05984		-0.944807	-0.967621	GMD_pred	856
Valine (2TMS)			0.786405	-0.336015	-0.118983	0.392892	2.81858	-0.10528	0.23368	0.403544	-0.909644	-0.928511	0.11138	-1.50219	0.38344		-0.432956	-0.796343	GMD_pred	917

## Sheet: normalized
Metabolite	3h C1	3h C2	3h C3	3h C4	6h C1	6h C2	6h C3	6h C4	3h V1	3h V2	3h V3	3h V4	6h V1	6h V2	6h V3	6h V4	Library	Similarity
2,2'-Bipyrrolidine	86.3248	55.4313	84.7235	75.0825	32.0727	58.3012	50.7164		49.2851	23.0174		27.8507	11.981		46.7445	0.866494	mainlib	894
2-Butenedioic acid (2TMS)	6.38553	5.18104	3.15973	2.25102	11.5973	5.25406	5.0683	4.81827	4.23472	2.0357	6.7996	2.19901	7.74064	10.1413	3.15459	0.614201	mainlib	894
2-Ethylhexanal ethylene glycol acetal	53.1963	43.7862	47.5313	33.3492	49.6511	43.0511	47.3121	39.1389	19.1818	24.7528	37.9391	16.1496	43.5026	78.4991	33.587	36.1665	mainlib	812
2-Ketoisocaproic acid (1TMS)	17.9995	16.5649	15.1851	13.3711	25.3581	10.9658	12.7469	8.35063	12.7243	9.38076	12.0054	11.2634	11.0376		8.9919	4.5523	mainlib	909
3-Methyl-2-oxopentanoic-acid (1MeOX) (1TMS)	2.66719	2.28435	1.74601	1.50867	1.60954	1.14407	1.39169	0.938724	1.66457	1.04754		1.35474	1.37776		1.11031	0.490366	gmd_var_alk_mz_all_2011	881
4-Methoxy-2-[(TMS)oxy]phenyl 2-[(TMS)oxy]phenylmethanone	0.103001	0.134887	0.170944	0.148367	0.132639	0.244161	0.220044	0.104624	0.151063	0.13129		0.131355			0.128945	0.0615524	mainlib	738
5'-Methylthioadenosine (3TMS)	7.57775	6.17383	6.01997	4.54257	7.35434	5.58099	5.98626	2.8429	9.5007	8.04111	9.0247	7.50822	7.22994	10.5619	6.82816	4.6728	mainlib	773
7-(TMS)-2,6-bis[(TMS)oxy]-7H-purine	9.93707	7.18185	7.87731	6.95497	14.9628	14.1993	15.3377	10.2964	14.3516	11.8476	10.3233	6.55149	10.5624		11.8373	5.67659	mainlib	902
Adenine (2TMS)	16.9395	12.8186	11.2566	10.9101	15.2343	11.9697	12.8227	10.3863	17.8963	14.7733	16.9699	12.011	11.4703	13.8786	11.9084	7.06106	mainlib	914
Adenosine (3TMS)	3.82234	3.45448	4.63374	7.6409	7.8133		6.93881	12.1187	2.73685	2.81222	2.24232	2.26101	1.43565	2.68122	1.89043		gmd_var_alk_mz_all_2011	797
Adenosine (4TMS)	59.6842	45.5881	53.3771	46.6104	60.3702	48.6263	53.4052	43.1009	56.1546	47.3762	51.0803	38.2089	43.8702	52.7172	42.5097	29.1135	mainlib	875
Adenosine-5-monophosphate (4TMS)	8.56846	10.393	12.4734	9.94123	17.4105	4.80714	17.9354	9.1755	6.09593	8.96536	7.59987	9.01779	8.57009	20.9811	15.117	2.6883	gmd_var_alk_mz_all_2011	912
Alanine, N-methyl-N-(byt-3-en-1-yloxycarbonyl)-, byt-3-en-1-yl ester	0.714851	0.422011	0.440044	0.255172	0.423895	0.210247	0.262968	0.212437	0.746987	0.260893		0.466483	0.592427		0.59426		mainlib	740
Alanyl-alanine (2TMS)	7.46893	6.64971	6.27169	5.73872	10.707	9.61173	9.60122	7.77147	6.75422	5.88263	4.95845	4.67964	3.33087	3.56384	3.59877	1.9513	gmd_var_alk_mz_all_2011	887
Allantoin (4TMS)	2.39969	2.17851	1.6816	1.30502	2.60978	1.67721	1.94471	1.60794	2.17761	1.81656	1.94066	1.77103	1.72076	2.21196	1.73953	0.793388	gmd_pred_mosys-ri	762
Asparagine (3TMS)	5.28213	9.92415	8.04928	5.12389	9.01957	8.71507	9.93667	6.20784	14.6279	9.28113			8.03859	9.04001	10.3155		gmd_var_alk_mz_all_2011	903
Benzenemethanol, 2-chloro-alpha-[[(1-methylethyl)amino]methyl]-	2.53944	3.23604	0.856741	0.63427	0.550336	1.38985	4.40802	0.665934		0.809497		0.530458	0.365365		0.339313		mainlib	744
Benzenepropanoic acid, alpha-(methoxyimino)-4-[(TMS)oxy]-, TMS ester	9.19	9.83309	6.66194	6.16642	9.53108	6.95806	7.61992	5.4758	6.94456	5.68923	5.13836	6.2225	5.02367	4.30632	4.52775	2.23278	mainlib	781
Benzothiazole, 2-(2-hydroxyethylthio)-	21.6681	17.084	18.7834	13.6757	12.243	10.4693	11.7621	8.7654	21.8158	18.3229	25.0194	17.7746	16.4545	1.07332	0.411989	-0.51151	mainlib	741
Bernzothiazole, 2-[2-(2-fluorophenoxy)ethylthio]-	1.60497	1.29707	1.47162	1.0691	1.04127	0.895518	0.990177	0.749404	1.62638	1.35192	1.8138	1.32079	1.29521	0.147435	0.0951739		mainlib	720
beta-Alanine (3TMS)	0.543673	0.495431	0.536627	2.32777	5.31633	4.57077	4.82268	3.46704	0.0803824	0.0665733	0.0493117	0.0619173	1.04647	0.901431	1.26182	0.758135	mainlib	881
Butanedioic acid (2TMS)		45.4278	54.4098	46.9815	56.7109	44.3696	46.7806	37.3408	53.4895	45.8165	48.5278	38.6611	46.8917	59.3895	43.1833	31.2366	mainlib	839
Butanoic acid, 4-amino- (3TMS)	5.7243	4.58241	5.04627	5.50619	10.6074	8.6383	9.3027	6.5306	2.22484	1.81432	1.88933	1.60067	3.35812	3.79427	2.7085	1.5895	gmd_var_alk_mz_all_2011	886
Butanoic acid, 4-methylthio-2-oxo- (1MEOX) (1TMS) MP	6.05666	6.68232	4.84894	4.45058	5.55004	3.59907	4.47778	2.72832	2.32651	1.74393	1.49412	2.06317	2.67111	2.86239		1.47031	gmd_var_alk_mz_all_2011	830
Butylated Hydroxytoluene (1TMS)	14.9244	12.6373		9.56919	9.25795	8.21694	9.54029	6.26883	13.6403	10.7361	13.5529	10.2282	9.82902	0.260484	-0.179462	-0.361327	mainlib	858
Cadaverine (4TMS)	38.344	39.5917	28.2713	31.4004	36.545	26.7517	31.3323	24.5144	47.308	37.8147	43.7598	41.4206	49.8778	59.6842	43.4921	32.181	mainlib	817
Carbodiimide (2TMS)	0.143132	0.177293		0.103	0.182157	0.197441	0.139962	0.123835	0.161658	0.116042	0.28374	0.105509	0.194879	0.260624	0.119756	0.078493	gmd_pred_mosys-ri	818
Citric acid (4TMS)	16.9999	13.8812	11.1524	9.37787	11.3558	7.12811	8.36433	7.59397	58.6904	47.7703	53.8282	46.6191	26.8627	34.7306	31.1436	20.7932	mainlib	768
Cyclodecasiloxane, eicosamethyl-		2.21266	1.18503	2.13914	2.31554	0.281018	2.1451		0.869995	1.09781	2.11752	1.04949	2.0325	2.08923	1.03591	0.707494	mainlib	708
Cycloheptasiloxane, tetradecamethyl-	0.105633	0.419936	0.121374	0.22065	0.221221	0.0540891	0.216535	0.153534	0.123283	0.132648	0.207068	0.147248	0.17584		0.270437	0.151348	mainlib	769
Diethylbutoxypentyloxysilane	0.261942	0.166091	0.201569	0.188229	0.817752	0.623697	0.622988		0.198844	0.168632	0.153874		0.166255	0.167243	0.151699		mainlib	741
Dihydroxyacetone phosphate (1MEOX) (3TMS)	3.31658	3.33549	4.12154	3.02239	7.83452	6.33189	9.02003	5.89507	4.15821	3.23201	2.77912	2.59734	2.62599	3.02804	3.90693	2.43722	gmd_var_alk_mz_all_2011	899
Ethanol, 2-butoxy-, phosphate (3:1)	7.54504	6.06977	6.95157	5.77345	4.22772	4.51405	4.52422	3.13989	5.11066	5.62541	6.67451	4.80461	4.91503	0.377676	0.231514		mainlib	875
Etoxeridine	73.4285	58.2542	70.0187	55.3194	9.11646	7.52768	8.56967	3.63692	42.1429		42.3065			70.5421		32.4176	mainlib	822
Fumaric acid (2TMS)	16.25	14.1188	11.9904	9.06954	14.6992	12.448	12.6819	12.144	9.04897	6.77958	8.16423	6.44326	9.44167	9.37312	6.72625	3.10922	mainlib	905
Glucose-6-phosphate (1MEOX) (6TMS) BP	5.87489	2.86042	5.34484	6.19037	18.9369	17.7672	17.8939	12.9117	7.34975	7.10587	3.74645	7.1062	3.4403	8.62813	4.07498	2.14244	gmd_var_alk_mz_all_2011	884
Glucose-6-phosphate (1MEOX) (6TMS) MP	26.4453	18.3482	30.5037	26.9967	46.6275	43.8846	28.9661	21.8602	30.1908	27.2653	25.204	27.4567	18.9403	31.0068	21.7769	14.2297	gmd_pred_mosys-ri	734
Glucose-6-phosphate, 2-amino-2-deoxy- (6TMS)	1.32267	1.12728	2.67062	1.25083	5.8227	6.36599	5.96271	2.36665				0.273918	0.396402	0.624928	0.571584	0.262204	gmd_pred_mosys-ri	899
Glutamic acid (3TMS)	73.1232	57.9469	69.7116	55.0072	27.0748	13.6261	13.0882		41.7799	35.7858	41.942	30.3442	49.9555	70.2235	44.4487	32.1023	mainlib	897
Glutamic acid, bis(TMS) ester	14.3128	12.7111	17.244	12.6561	3.93367	15.0689	16.3915	2.66326	5.67544	1.4485	1.23479	2.24845			5.11883	0.710883	mainlib	853
Glutamine (3TMS)	34.929	28.5267	32.5773	21.3516	19.0633	19.7407	21.6223	14.479	6.73226		3.76764	4.32581	13.0471	18.6695	13.6788	9.52757	gmd_pred_mosys-ri	736
Glutamine (4TMS)	15.6999	14.5825	17.8377	7.14147	9.96389	9.39366	12.6566	9.34437	1.33708	1.5969		0.810381	2.33979	4.70697	4.07732	2.29237	gmd_var_alk_mz_all_2011	880
Glyceric acid-3-phosphate (4TMS)	0.865819	1.49523	1.2351	1.06744	2.18314	0.787751	1.06752	1.20827	0.718946	0.618439	2.3858	1.39394	1.56232	1.02733	1.26713	0.45668	gmd_var_alk_mz_all_2011	870
Glyceryl-glycoside (TMS) ether	0.523358	0.301909	0.432529	0.396134	0.696567	0.63368	0.624101	0.547853	0.589996	0.481302	0.436761	0.343357	0.102367	0.283951	0.36878	0.280754	mainlib	850
Glycine (3TMS)	20.2985	15.6985	18.0027	15.5808	18.2986	13.9151	14.431	22.3623	20.6129	32.4919	21.5286	13.0912	11.6312	13.6744	12.3496	7.7863	gmd_pred_mosys-ri	770
Glycyl-proline (3TMS)	0.983189	0.841915	0.887307	1.80302	6.91162	5.66708	6.31251	4.99047	0.401734	0.369766	0.395705	0.332474	0.796923	0.929114	0.765365	0.455	gmd_var_alk_mz_all_2011	892
Hexamethyldisiloxane	0.483837		0.523018	0.322749	1.33065	1.00067	1.3661	0.518457	0.313775	0.259981	0.270852			0.171646	0.303275	0.126255	mainlib	879
Hexanedioic acid, bis(2-ethylhexyl) ester	13.4184	10.3907	12.1043	9.18169	7.60041	6.4144	6.99592	5.74757	13.8447	12.2366	16.314	11.6782	10.7394				mainlib	820
Hexasiloxane, tetradecamethyl-	5.13466	12.168	5.16704	7.30283	8.00527	2.97178	7.3007	4.96359	6.25746	5.81969	6.545	6.50674	5.88164	7.35032	8.73053	5.43753	mainlib	879
Homocysteine (3TMS)	0.67182	0.513219	0.453527	0.394432	0.714653	0.734	0.756879	0.660343	0.711187	0.519123	0.522438	0.567178	0.408507	0.565574	0.341761		gmd_var_alk_mz_all_2011	787
Homoserine (3TMS)	4.10521	3.81185	4.41552	3.47532	5.62625	4.85434	4.97829	3.32705	1.65954	1.42803	1.26006	1.02325	1.53821	2.42354	1.35534	0.751316	gmd_pred_mosys-ri	898
Hypoxanthine (2TMS)	2.3647	1.4761	1.36491			1.29335	1.43458	1.20332	1.50494	0.939641	0.720977		0.970932	0.991497		0.573568	gmd_var_alk_mz_all_2011	767
Indole-3-lactic acid (3TMS)	2.56989	2.46439	1.79502	1.65704	2.78847	1.90063	2.26776	1.99091	2.16012	1.91042	1.57358	1.81062	2.92775	2.29084	2.15887	1.03842	mainlib	757
Indole-3-pyruvic acid (1MEOX) (2TMS) MP	2.18898	2.66872	1.76826	1.8323	2.95713	1.12004	1.80088	1.42918		4.77368	5.21183	4.98622	4.16751	3.43566	2.36083	1.76784	gmd_var_alk_mz_all_2011	751
Isoleucine (2TMS)	15.6736	14.6301			17.3986	20.7459	22.5877	18.3764	3.4333	4.42976	5.40163	2.52238	6.47384	7.85267	5.40141	5.17987	mainlib	804
Cysteine (3TMS)	1.13031		1.19687	1.03142	1.20843	1.47084	1.5515	0.924866				1.23073	0.801929	0.433745	1.16168	0.420259	mainlib	868
Leucine (2TMS)	17.9547	13.0626	12.8107	13.2755	48.3862	21.2422	23.2542	22.3883	9.86647	10.2943	39.1967	5.76451	21.1031	39.8572	10.5099	8.89939	gmd_pred_mosys-ri	884
Leucine (TMS)	14.9318	10.6522	21.1925	20.3937	3.96868	17.3862	19.3701		8.99208	4.62004		4.80152	0.948584		5.36192		mainlib	923
Leucine, N-methyl-N-(2-methoxyethoxycarbonyl)-, dodecyl ester	0.77016	0.521817	0.50794	0.701398	0.870811	0.723483	0.633628	0.648888		0.329556	0.488715	0.231035	0.307219	0.377269	0.270324	0.185075	mainlib	755
L-Proline (2TMS)	89.5841	74.0334	80.2949	56.4707	122.203	75.3397	80.4935	69.3143	36.5144	42.8508	80.135	29.1259	88.8202		58.1665	60.7976	mainlib	896
Lumichrome (2MEOX)	2.68514	2.53291	2.38125	2.34563	2.75839	2.46029	2.43062	1.78134	3.91458	2.88145	2.7255	2.89026	2.94133	8.26413	2.45322	1.417	gmd_var_alk_mz_all_2011	875
Lysine (3TMS)	3.25504	2.95079	3.9877	2.21355	2.03218	3.84116	4.09549	0.494678	3.12784	1.12603	0.608027				1.84036		mainlib	848
Lysine (4TMS)	42.3828	32.2114	42.7625	31.3154	32.5559	30.3138	30.6903	23.9706	38.1764	33.9537	40.9246	24.0302	25.8688	35.6093	28.979	19.8779	mainlib	839
Malic acid (3TMS)	20.1125	18.7935	17.8281	15.4043	19.4221	14.9538	17.7455	12.4214	14.4484	10.621	9.24133	9.21015	11.0962	11.1274	11.5004	5.95237	gmd_pred_mosys-ri	890
Maltose (1MEOX) (8TMS) BP	1.21866	0.788052	1.05774	1.02667	3.14061	2.52808	2.24704	1.71227	1.25757	1.0503	0.710438	1.09051	1.12948	1.49699	0.990806	0.548098	gmd_pred_mosys-ri	920
Mannose, 2,3,4,5-tetrakis-O-(TMS)-, O-methyloxime, 6-[bis(TMS) phosphate]	26.4193	18.3302	30.4728	26.9691	46.5694	43.8302	43.5658	21.8334	30.161	27.2382	25.1795	27.429	18.9212	30.9762	21.7553	14.2159	mainlib	720
Methionine (2TMS)	13.6278	9.63782	13.5041	9.07117	17.2601	14.2351	15.6353	13.3939	7.35139	6.97706	8.59762	4.41843	7.38426	14.2219	7.72477	4.49906	mainlib	861
Methylal	7.52035	4.82629	6.20755	4.55651	6.31382	6.22383	6.36225	11.5153	4.49613	0.183963	3.58622	3.37369	4.11154		3.63575	1.40937	mainlib	753
Monomethyl succinate (1TMS)		2.47258	1.92927	1.54292	3.27216		1.94739	1.95792	2.38823	1.78098		1.82977	2.52755		1.87123	1.20547	mainlib	721
N-Acetyl-D-galactosamine (4TMS)	0.576665	0.248106	0.0504457	0.247048	1.82894	1.54035	1.39458	1.11396	0.306344	0.230781	0.295953	0.213925	0.591902		0.454131		mainlib	817
Nicotinamide (1TMS)	17.2895	14.156	13.3703	11.2818	11.1454	9.99677	10.8124	8.11319	19.8824	17.8686	23.2959	21.2806	13.6483	14.1858	15.437	9.05423	gmd_var_alk_mz_all_2011	840
Ornithine (4TMS)	36.347	27.0193	36.7134	25.7479	25.853	23.7207	24.3903	18.5082	31.0221	27.3569	33.8121	20.9841	18.2055	26.0561	22.0122	14.1987	mainlib	858
Ornithine, N2-acetyl- (3TMS)	2.47456	2.25336	1.81568	1.93885	3.72072	2.28428	2.70161	2.37945	2.07942	1.64452	1.68109	1.93519	2.2384	2.50658	2.1232	1.40067	gmd_pred_mosys-ri	716
Ornithine-1,5-lactam (2TMS)	0.33468	0.262936	0.528263	0.192647	0.33234	0.279562	0.328165	0.243713	0.514603	0.427464	0.521337		0.297045	0.377248		0.265016	gmd_var_alk_mz_all_2011	804
Pentanedioic acid, 2-(methoxyimino)-, bis(TMS) ester	28.8345	24.6116	19.1766	17.2693	14.7621	10.3792	15.4831	11.2947	13.4227	9.49056	6.54343	8.94574	16.5275	9.76721	13.7874	6.35999	mainlib	846
Pentanoic acid, 2-(methoxyimino)-3-methyl-, TMS ester	5.05302	7.26658	5.52676	5.01011	4.59418	4.00817	5.13004	3.63329	3.68035	0.938235		3.54863	1.12784		2.22831	1.59745	mainlib	756
Phenylalanine (2TMS)	21.982	15.0209	20.8489	19.1641	22.3234	24.6384	26.4218	19.1317	11.1076	10.7902	8.24109	7.37432	6.0098	6.60724	9.88224	5.07234	mainlib	914
Phenylpyruvic acid (1MEOX) (1TMS) MP	7.15944	7.20927	6.99489	4.75701	6.02434		5.15836	4.1092	7.57476	6.48648	6.59385	7.17362	4.12847	2.85681	4.68071		gmd_var_alk_mz_all_2011	823
Phosphoric acid (3TMS)	68.6826	62.546	72.9809	64.7714	53.8631	65.6578	64.4044	46.7647	83.7128	71.8218	100.123	71.7971	57.5867			54.9648	gmd_pred_mosys-ri	820
Phosphoric acid, 3-(methoxyimino)-2-[(TMS)oxy]propyl bis(TMS) ester	0.514931	0.13135	0.163163		0.414393		0.428887	0.295695	0.462137	0.404621	0.412846	0.347671			0.428584	0.215439	mainlib	744
Phosphoric acid, bis(TMS) 2,3-bis[(TMS)oxy]propyl ester	1.11655	0.796611	1.36539	1.16412	2.62044	2.26932	2.67866	1.76473	1.79797	3.23941	3.55204	2.40421	0.92558	2.14812		1.35064	mainlib	824
Phosphoric acid, bis(TMS)monomethyl ester	1.27243	1.22758	1.22699	0.968473	1.05278	0.910822	1.06555	0.629567	2.0168	1.43338	0.913704	1.58239	0.929646		1.43193	0.612352	mainlib	782
Pipecolic acid, N-ethoxycarbonyl-, ester	0.548067	0.557452	0.309988	0.217221	0.630821	0.487374	0.424949	0.435613	0.510293	0.444075	0.457376	0.32069	0.513957	0.612641	0.354287		mainlib	765
Proline (1TMS)		55.5013	84.7104	75.0747	32.1032	49.555	50.7141		49.323	23.0315		27.8678	11.9878		46.7962	0.867695	gmd_var_alk_mz_all_2011	840
Proline [+CO2] (2TMS)	27.173	14.3438	22.9528	26.7296	17.6317	17.1828	21.1866	14.7798	4.40404	3.41655	9.0543	3.57177	9.00031	4.52597	4.66906	2.37928	gmd_var_alk_mz_all_2011	886
Putrescine (4TMS)	46.686	43.9229	35.2889	31.7912	30.8662	21.3405	25.1541	20.2391	45.9244	34.9193	37.6998	38.5682	44.3904	50.4828	37.1816	23.671	gmd_pred_mosys-ri	793
Pyrophosphate (4TMS)	5.19329		7.96047	5.03504	8.96651	8.65987	9.88092	6.1557	14.5277	9.1797	7.41191	10.4586	7.94886	8.94902	10.2278	4.05974	gmd_pred_mosys-ri	894
Pyrrole-2-carboxylic acid (2TMS)	2.7204	2.54193	2.26039	2.20251	3.25423	3.27363	3.19333	2.41079	0.812772	0.635154		0.500709	1.38661	1.57076	0.854777	0.550888	gmd_var_alk_mz_all_2011	892
Ribose	13.7786	8.69867	16.6877	13.3847	29.2903	25.8876	29.3505	18.7398	12.2461	9.03738	7.12457	7.43596	6.72742	7.15895	8.90513	4.6399	mainlib	915
Ribulose-5-phosphate (1MEOX) (5TMS) BP	2.21641	1.19604	2.32866	1.31625	2.89812	4.69533	3.08499	1.41479	2.84796	1.92646	1.98252	1.90426	1.4585	2.46678	2.16635	0.880355	gmd_var_alk_mz_all_2011	850
Spermidine (5TMS)	16.4245	7.73836	11.1327	6.06131	5.58027	4.11429	4.46748	3.28565	9.03696	7.41134	10.0176	7.6414	6.01502	7.77921	7.23689	3.57667	gmd_pred_mosys-ri	888
Succinic semialdehyde (1MEOX) (1TMS) BP	0.910392	0.244299	0.242614	0.284302	0.29011	0.228855	0.385783		0.460839	1.22071		0.320787			0.345592	0.714033	gmd_var_alk_mz_all_2011	779
Sucrose (8TMS)	56.0672		53.6959	10.4268	10.2045	35.9795	9.45651	8.51158	48.8615	42.4461			41.6167	52.0149	38.088	31.8805	mainlib	766
Threonine (3TMS)	43.1538	36.2602	40.2795	33.4206	37.9595	28.6841	30.4329	24.6973	33.5935	27.6034	36.7705	24.1305	28.3602	34.7148	25.6887	17.4453	mainlib	929
Thymidine-5'-monophosphoric-acid (3TMS)	0.791843	0.714496	0.767549	0.766094	1.38005	1.01813	1.21257	0.935336	0.979828	0.770789	0.784279	0.686887	0.561476	0.943259	0.694135	0.429012	gmd_var_alk_mz_all_2011	740
Trehalose (8TMS)	56.3458		54.044	44.9996	43.9232	36.3146	37.7215	33.9738	49.2079	42.7529			41.9405	52.4035	38.3641	32.1032	gmd_pred_mosys-ri	915
Tyrosine (3TMS)	22.278	16.8053	22.0715	19.518	27.7901	24.9848	27.9318	21.7666	7.64692	6.94961	6.02389	4.63212	7.85769	10.2598	8.95057	4.8319	gmd_pred_mosys-ri	889
Unknown 1	3.0323	2.68085	3.24631	3.39402	4.39101	4.52519	4.65788	3.03399	4.64945	4.22935	3.71535	3.65532	4.78515	6.82445	5.98721	3.23068	gmd_var_alk_mz_all_2011	911
Unknown 13	4.65891	3.62147	4.42532	3.19485	3.07007	2.52671	2.80517	2.25515	4.69267	4.11555	5.62065	3.94131	3.80113	0.219074	0.0566015	-0.0758861	gmd_pred_mosys-ri	792
Unknown 14	1.38092	1.06278	1.58041	1.42927			2.15858	1.55584	4.43085	3.81428	4.4601	3.38648	2.49824	3.43597	2.07336	1.81935	gmd_pred_mosys-ri	773
Unknown 17	6.22989	5.8627	8.38828	6.77344	3.71703	3.8544	3.3765	0.945157	5.03452	4.82884	5.89072	4.48885	4.47289	0.236491	0.184315	0.542121	gmd_pred_mosys-ri	766
Unknown 25	1.50588		1.03045	0.487115	1.68911	0.791086	0.949251	0.893577	3.66279	2.17902	2.3878	2.34148	2.60735	1.76063	1.30188	0.685116	gmd_pred_mosys-ri	740
Unknown 28	0.662315	0.338529	0.539466	0.661285	0.800557	0.661335	0.604447	0.571801	0.489004	0.417204	0.664169	0.4218	0.14847	0.251605	0.212227	0.118676	gmd_pred_mosys-ri	724
Unknown 29	1.38749	1.2815	1.02747	1.42184		4.20689	3.7565	2.86025	0.346985	0.276838		0.241538	0.637414	1.14149	0.412414	0.259547	gmd_pred_mosys-ri	719
Unknown 32	43.5912	35.4235	37.8802	27.5044	12.9713	11.749	12.5142	11.2551	33.2591	23.9647	25.0476	22.0918	22.0902	22.347	21.5355	11.9469	gmd_pred_mosys-ri	889
Unknown 4	57.0726	53.9336	60.1675	49.5009	1.06695	30.239	30.5688	25.8169	117.358	31.7582	153.124	105.326	76.0678	125.728	74.2361	65.5973	gmd_var_alk_mz_all_2011	876
Unknown 6	0.924762	0.442638	0.912856	0.91655	2.30447	1.44173	1.81065	1.24731	0.38468	0.540279			0.210407		0.285185	0.270354	gmd_pred_mosys-ri	856
Uracil (2TMS)	12.8182	8.70024	10.4413	8.86546	12.5535	10.1245	10.6319	7.55338	11.2818	9.34608	11.6052	7.25885	10.8641	12.9904	10.0313	6.29772	gmd_var_alk_mz_all_2011	883
Uridine (4TMS)	24.8794	20.7437	25.9764	20.0103	29.4683	25.3894	27.8313	20.2002	22.0122	19.0231	18.5012	15.8388	18.5328	25.852	20.9523	11.0771	gmd_pred_mosys-ri	820
Uridine 5'-monophosphate (5TMS)	2.32094	5.34726	3.15304	4.82945	2.28638	1.41811	2.16844	1.10732	7.72585	7.11178	4.86959	5.85469	3.20854	9.22388	8.75824	4.84368	gmd_var_alk_mz_all_2011	898
Valine (2TMS)	41.2918	28.812	31.2251	36.9165	63.887	31.3774	35.1462	37.0349	22.4339	22.2242	33.7864	15.8456	36.8114		27.7341	23.6937	gmd_pred_mosys-ri	917
Valine, N-methyl-N-methoxycarbonyl-, octyl ester	0.331134	0.317435	0.328632	0.268589	0.447109	0.435292	0.514108	0.286819	0.202476	0.188118	0.229212	0.152011	0.178975	0.220052	0.192773	0.110499	mainlib	795

## Sheet: without blank
Metabolite	3h V1	3h V2	3h V3	3h V4	6h V1	6h V2	6h V3	6h V4	3h C1	3h C2	3h C3	3h C4	6h C1	6h C2	6h C3	6h C4	Library	Similarity
OD600	0.3713	0.3669	0.3705	0.3777	0.4147	0.409	0.4244	0.4279	0.4189	0.4225	0.419	0.4188	0.7013	0.6741	0.6674	0.7137
2-Ethylhexanal ethylene glycol acetal	7.12222	9.08179	14.0564	6.09969	18.0405	32.1061	14.2543	15.4757	22.2839	18.4997	19.9156	13.9667	34.8203	29.0208	31.5761	27.9334	mainlib	812
Valine (2TMS)	8.32972	8.15405	12.5179	5.98488	15.2657		11.7704	10.1385	17.2971	12.1731	13.0833	15.4606	44.8039	21.1515	23.4566	26.4318	gmd_pred_mosys-ri	917
L-Lysine, 4TMS derivative	14.1749	12.4576	15.1626	9.07622	10.7278	14.5642	12.2987	8.50574	17.7541	13.6093	17.9175	13.1149	22.8315	20.4346	20.4827	17.1078	mainlib	839
L-Proline, 2TMS derivative	13.5578	15.722	29.69	11.0009	36.8337		24.6858	26.0153	37.5268	31.2791	33.6436	23.6499	85.7012	50.7865	53.7213	49.4696	mainlib	896
Adenosine, 4TMS derivative	20.8502	17.3823	18.9252	14.4315	18.193	21.5613	18.0411	12.4577	25.0017	19.261	22.365	19.5205	42.3376	32.779	35.6426	30.7611	mainlib	875
L-Glutamic acid, 3TMS derivative	15.5129	13.1298	15.5395	11.461	20.7166	28.7214	18.864	13.7366	30.6313	24.4826	29.2091	23.037	18.9875	9.18538	8.73505		mainlib	897
Unknown 4	43.575	11.6521	56.7323	39.7817	31.5453	51.4228	31.5058	28.0691	23.9077	22.787	25.2102	20.731	0.748252	20.3841	20.4016	18.4255	gmd_var_alk_mz_all_2011	876
Pyrophosphate (4TMS)	5.39413	3.36803	2.74611	3.9502	3.29639	3.66015	4.34069	1.73716	2.17547		3.33544	2.10867	6.28821	5.83762	6.59452	4.39332	gmd_pred_mosys-ri	894
Adenosine-5-monophosphate (4TMS)	2.26342	3.28939	2.81575	3.40602	3.55401	8.58127	6.41566	1.15032	3.58933	4.39103	5.22635	4.16339	12.21	3.2405	11.9701	6.54855	gmd_var_alk_mz_all_2011	912
Citric acid, 4TMS derivative	21.7918	17.5269	19.9433	17.6081	11.14	14.2048	13.2173	8.89742	7.12126	5.86482	4.67286	3.92745	7.9638	4.80506	5.58235	5.41982	mainlib	768
Butanedioic acid, 2TMS derivative	19.8606	16.8101	17.9795	14.6023	19.446	24.2903	18.327	13.3662		19.1933	22.7977	19.6759	39.7714	29.9096	31.2213	26.6501	mainlib	839
Ethanol, 2-butoxy-, phosphate (3:1)	1.89759	2.06396	2.4729	1.8147	2.03826	0.154469	0.0982547		3.16062	2.56448	2.91271	2.41792	2.9649	3.04292	3.01947	2.24094	mainlib	875
Methylal	1.66941	0.067496	1.32869	1.27424	1.70505		1.54301	0.603071	3.15027	2.03911	2.60096	1.90827	4.42788	4.19549	4.24617	8.21844	mainlib	753
Fumaric acid (2TMS)	3.35988	2.48743	3.02485	2.43362	3.91546	3.83361	2.85462	1.33043	6.80715	5.96518	5.02398	3.79832	10.3086	8.39123	8.46393	8.66721	mainlib	905
Benzenemethanol, 2-chloro-?-[[(1-methylethyl)amino]methyl]-		0.297005		0.200354	0.151517		0.144004		1.06377	1.36723	0.358975	0.265632	0.385951	0.936898	2.94191	0.475277	mainlib	744
Unknown 17	1.86932	1.7717	2.18251	1.69544	1.85491	0.096725	0.0782232	0.231974	2.6097	2.47699	3.51469	2.83672	2.60675	2.59825	2.25348	0.674558	gmd_pred_mosys-ri	766
Unknown 13	1.74239	1.51	2.08245	1.48863	1.57633	0.0896014	0.0240217	-0.0324717	1.95162	1.53007	1.85421	1.338	2.15304	1.70325	1.87217	1.6095	gmd_pred_mosys-ri	792
Benzothiazole, 2-(2-hydroxyethylthio)-	8.10021	6.72267	9.26969	6.71348	6.82368	0.438988	0.174848	-0.218875	9.07677	7.21799	7.87023	5.72739	8.58603	7.05736	7.85004	6.25587	mainlib	741
Butylated Hydroxytoluene, TMS derivative	5.06464	3.93908	5.02136	3.8632	4.0761	0.106538	-0.0761637	-0.154612	6.25185	5.33927		4.00758	6.4926	5.53904	6.36719	4.47406	mainlib	858
Adenine (2TMS)	6.6449	5.42034	6.28735	4.53654	4.75673	5.67636	5.05394	3.02143	7.09596	5.41586	4.71651	4.56916	10.6838	8.06878	8.55786	7.41273	mainlib	914
Phosphoric acid, bis(trimethylsilyl)monomethyl ester	0.748837	0.525909	0.338527	0.597669	0.385524		0.607709	0.262025	0.53302	0.518651	0.51411	0.405597	0.738311	0.613985	0.711146	0.449322	mainlib	782
unknown 25	1.36	0.799481	0.884682	0.884377	1.08127	0.720099	0.552517	0.293161	0.630814		0.43176	0.204004	1.18457	0.533271	0.63353	0.637746	gmd_pred_mosys-ri	740
Uracil (2TMS)	4.18894	3.42908	4.29973	2.74167	4.50534	5.31309	4.25727	2.69479	5.36952	3.67585	4.37491	3.71285	8.80374	6.82493	7.09576	5.39084	gmd_var_alk_mz_all_2011	883
2-Butenedioic acid, (Z)-, 2TMS derivative	1.57235	0.746897	2.51925	0.830568	3.21004	4.14779	1.33881	0.262817	2.6749	2.18899	1.32393	0.942727	8.1332	3.54176	3.38259	3.4388	mainlib	837
L-Threonine, 3TMS derivative	12.4733	10.1277	13.6235	9.11407	11.761	14.1984	10.9023	7.46484	18.0771	15.3199	16.8771	13.9966	26.621	19.3359	20.3109	17.6264	mainlib	929
L-Leucine, TMS derivative	3.33876	1.69509		1.81353	0.393378		2.2756		6.25494	4.50057	8.87965	8.54087	2.78324	11.7201	12.9276		mainlib	923
Maltose (1MEOX) (8TMS) BP	0.466934	0.385357	0.263217	0.411885	0.468394	0.612269	0.420498	0.234531	0.510497	0.332952	0.443195	0.42997	2.20251	1.70418	1.49967	1.22205	gmd_pred_mosys-ri	920
Ribose	4.54697	3.31582	2.63965	2.80856	2.78986	2.92801	3.77934	1.98541	5.77186	3.67519	6.99214	5.60552	20.5413	17.4508	19.5885	13.3746	mainlib	915
Trehalose (8TMS)	18.2709	15.686			17.3927	21.433	16.2817	13.7369	23.6033		22.6444	18.8458	30.8034	24.4797	25.1753	24.2471	gmd_pred_mosys-ri	915
Phenylalanine, 2TMS derivative	4.12426	3.95894	3.05332	2.78528	2.49226	2.70236	4.19402	2.17045	9.20827	6.34632	8.73571	8.02591	15.6554	16.6087	17.6339	13.6543	mainlib	914
Unknown 1	1.72634	1.55175	1.37654	1.38062	1.9844	2.7912	2.54097	1.38241	1.27023	1.13266	1.3602	1.42141	3.07941	3.05043	3.10867	2.16536	gmd_var_alk_mz_all_2011	911
2-Ketoisocaproic acid (1TMS)	4.72452	3.4418	4.448	4.25418	4.57727		3.81616	1.94793	7.53998	6.99867	6.36256	5.59981	17.7836	7.39206	8.50727	5.95984	mainlib	909
Asparagine (3TMS)	5.43135	3.40525			3.3336	3.69736	4.3779		2.21268	4.19295	3.37265	2.14589	6.32543	5.87483	6.63174	4.43053	gmd_var_alk_mz_all_2011	903
7-(Trimethylsilyl)-2,6-bis[(trimethylsilyl)oxy]-7H-purine	5.32875	4.34689	3.82479	2.4745	4.38023		5.02374	2.42901	4.16264	3.03433	3.30059	2.91274	10.4934	9.57174	10.2364	7.34856	mainlib	902
Dihydroxyacetone phosphate (1MEOX) (3TMS)	1.54395	1.18582	1.02966	0.981016	1.089	1.23847	1.6581	1.04289	1.38932	1.40924	1.72693	1.26578	5.49435	4.26833	6.01997	4.20731	gmd_var_alk_mz_all_2011	899
Glucose-6-phosphate, 2-amino-2-deoxy- (6TMS)				0.103459	0.164388	0.255596	0.24258	0.112197	0.554065	0.476278	1.11899	0.523848	4.08346	4.29132	3.97951	1.68908	gmd_pred_mosys-ri	899
Homoserine (3TMS)	0.616187	0.523945	0.466852	0.386482	0.637897	0.991226	0.575208	0.321488	1.71967	1.61051	1.8501	1.45546	3.94569	3.27231	3.32251	2.37452	gmd_pred_mosys-ri	898
Uridine 5'-monophosphate (5TMS)	2.86861	2.60931	1.80418	2.21132	1.33058	3.77257	3.717	2.07261	0.972242	2.25922	1.32112	2.02257	1.60344	0.955947	1.44722	0.790293	gmd_var_alk_mz_all_2011	898
2,2'-Bipyrrolidine	18.2995	8.44508		10.5192	4.96853		19.8384	0.370773	36.1615	23.4197	35.4992	31.4446	22.4926	39.3008	33.8481		mainlib	894
Pyrrole-2-carboxylic acid (2TMS)	0.301782	0.233038		0.189118	0.575025	0.642441	0.362767	0.235725	1.13958	1.07397	0.947105	0.922413	2.28219	2.20676	2.13123	1.72058	gmd_var_alk_mz_all_2011	892
Glycyl-proline (3TMS)	0.149164	0.135667	0.146609	0.125575	0.330484	0.380008	0.324821	0.194695	0.411858	0.355709	0.371782	0.755105	4.84712	3.82018	4.21297	3.56169	gmd_var_alk_mz_all_2011	892
Malic acid (3TMS)	5.36471	3.89685	3.42391	3.47867	4.60159	4.5511	4.88077	2.54702	8.42514	7.94027	7.46996	6.45133	13.6208	10.0804	11.8433	8.86519	gmd_pred_mosys-ri	890
Unknown 32	12.3491	8.79266	9.28014	8.34407	9.1608	9.13991	9.13965	5.11209	18.2603	14.9664	15.8718	11.5188	9.09679	7.91998	8.35201	8.03276	gmd_pred_mosys-ri	889
Tyrosine (3TMS)	2.8393	2.54981	2.23185	1.74955	3.25858	4.19627	3.79862	2.06757	9.33223	7.10025	9.24797	8.17413	19.4892	16.8422	18.6417	15.5348	gmd_pred_mosys-ri	889
Spermidine (5TMS)	3.35542	2.71922	3.71152	2.88616	2.49443	3.1817	3.07134	1.53046	6.88022	3.26946	4.66462	2.53848	3.91345	2.77345	2.9816	2.34497	gmd_pred_mosys-ri	888
Alanyl-alanine (2TMS)	2.50784	2.15834	1.83711	1.7675	1.38131	1.45761	1.52732	0.834961	3.12874	2.8095	2.62784	2.40338	7.50883	6.47927	6.40786	5.5465	gmd_var_alk_mz_all_2011	887
Butanoic acid, 4-amino- (3TMS)	0.826082	0.665673	0.699998	0.604574	1.39261	1.55186	1.14949	0.680145	2.39791	1.93607	2.11439	2.30599	7.439	5.82308	6.20862	4.66089	gmd_var_alk_mz_all_2011	886
Proline [+CO2] (2TMS)	1.63522	1.25353	3.35462	1.34906	3.73243	1.85112	1.98155	1.01809	11.3828	6.06027	9.61721	11.1943	12.3651	11.5829	14.1399	10.5484	gmd_var_alk_mz_all_2011	886
Pentanoic acid, 2-(methoxyimino)-3-methyl-, trimethylsilyl ester	1.36652	0.344238		1.34032	0.467716		0.945694	0.683548	2.11671	3.07013	2.31571	2.09823	3.2219	2.70191	3.42379	2.59308	mainlib	756
Leucine (2TMS)	3.66342	3.77696	14.5224	2.17725	8.75144	16.3016	4.46042	3.80805	7.52121	5.51897	5.36767	5.55979	33.9332	14.3193	15.5199	15.9785	gmd_pred_mosys-ri	884
Glucose-6-phosphate (1MEOX) (6TMS) BP	2.72896	2.60714	1.38806	2.68401	1.42669	3.52891	1.72942	0.916749	2.46099	1.20853	2.23949	2.59253	13.2805	11.9768	11.9424	9.21508	gmd_var_alk_mz_all_2011	884
3-Methyl-2-oxopentanoic-acid_2_1MeOX_1TMS	0.618054	0.384342		0.511685	0.571359		0.471216	0.209827	1.11729	0.965138	0.731578	0.63183	1.12877	0.771221	0.928816	0.669967	gmd_var_alk_mz_all_2011	881
beta-Alanine, 3TMS derivative	0.029846	0.0244257	0.01827	0.0233862	0.433973	0.368685	0.535516	0.324406	0.227745	0.20932	0.224847	0.974871	3.72834	3.08116	3.21866	2.47442	mainlib	881
Glutamine (4TMS)	0.496458	0.585902		0.306081	0.970311	1.92515	1.73041	0.980903	6.57668	6.16109	7.47399	2.99085	6.98768	6.33227	8.44699	6.66907	gmd_var_alk_mz_all_2011	880
Hexasiloxane, tetradecamethyl-	2.3234	2.13524	2.42492	2.45759	2.43912	3.00628	3.70524	2.32672	2.15091	5.14097	2.16499	3.05842	5.6141	2.00328	4.87249	3.54251	mainlib	879
Lumichrome (2MEOX)	1.45348	1.0572	1.0098	1.09165	1.21977	3.38003	1.04115	0.606334	1.12481	1.07015	0.997743	0.982348	1.93446	1.65848	1.6222	1.27134	gmd_var_alk_mz_all_2011	875
Glyceric acid-3-phosphate (4TMS)	0.266945	0.226905	0.883938	0.52649	0.647894	0.420179	0.537768	0.195413	0.362692	0.631735	0.517506	0.447043	1.53104	0.531023	0.712461	0.862341	gmd_var_alk_mz_all_2011	870
L-Cysteine, 3TMS derivative				0.464847	0.33256	0.177402	0.493018	0.179829	0.473485		0.50149	0.431958	0.847472	0.991493	1.03547	0.660077	mainlib	868
L-Methionine, 2TMS derivative	2.72957	2.55988	3.18542	1.66884	3.06225	5.81674	3.27839	1.92515	5.70867	4.07198	5.6582	3.79901	12.1045	9.59589	10.435	9.55922	mainlib	861
L-Ornithine, 4TMS derivative	11.5185	10.0373	12.5274	7.92568	7.54981	10.657	9.34199	6.07561	15.2257	11.4156	15.3829	10.7832	18.1307	15.9902	16.2781	13.2093	mainlib	858
Thymidine-5'-monophosphoric-acid_3TMS	0.36381	0.282803	0.290575	0.259437	0.232844	0.385793	0.294591	0.183574	0.331703	0.301875	0.321603	0.32084	0.967828	0.686319	0.809268	0.66755	gmd_var_alk_mz_all_2011	740
Unknown 6	0.142832	0.198228			0.0872558		0.121033	0.115685	0.387383	0.187015	0.382487	0.383851	1.61612	0.971871	1.20843	0.890207	gmd_pred_mosys-ri	856
L-Glutamic acid, bis(trimethylsilyl) ester	2.10729	0.531454	0.457489	0.849241			2.17243	0.304187	5.99564	5.37043	7.22524	5.30038	2.75868	10.1579	10.9397	1.90077	mainlib	853
Ribulose-5-phosphate (1MEOX) (5TMS) BP	1.05745	0.706818	0.734522	0.71924	0.604842	1.00891	0.919398	0.376704	0.928454	0.505326	0.975709	0.551244	2.03245	3.16512	2.05893	1.00974	gmd_var_alk_mz_all_2011	850
Glyceryl-glycoside TMS ether	0.219065	0.17659	0.16182	0.129686	0.0424516	0.116136	0.15651	0.120135	0.219235	0.127556	0.18123	0.165901	0.488502	0.427163	0.416525	0.391003	mainlib	850
L-Lysine, 3TMS derivative	1.16137	0.413139	0.225274				0.781048		1.36354	1.24671	1.67085	0.927033	1.42517	2.58933	2.73333	0.353052	mainlib	848
Pentanedioic acid, 2-(methoxyimino)-, bis(trimethylsilyl) ester	4.98384	3.48209	2.42434	3.3788	6.85397	3.99479	5.85139	2.72144	12.0788	10.3984	8.03501	7.23237	10.3526	6.99659	10.3334	8.061	mainlib	846
Proline (1TMS)	18.3136	8.45027		10.5257	4.97133		19.8603	0.371287		23.4493	35.4937	31.4413	22.514	33.405	33.8466		gmd_var_alk_mz_all_2011	840
Nicotinamide (1TMS)	7.38233	6.55599	8.63112	8.0377	5.65996	5.80201	6.55146	3.87431	7.24256	5.98093	5.60216	4.72483	7.81624	6.73882	7.21622	5.79038	gmd_var_alk_mz_all_2011	840
Butanoic acid, 4-methylthio-2-oxo- (1MEOX) (1TMS) MP	0.863833	0.63985	0.553573	0.77926	1.10771	1.17072		0.629148	2.53713	2.82328	2.03171	1.8639	3.89224	2.42613	2.98847	1.9472	gmd_var_alk_mz_all_2011	830
Phosphoric acid, bis(trimethylsilyl) 2,3-bis[(trimethylsilyl)oxy]propyl ester	0.667588	1.18854	1.31603	0.908072	0.383838	0.878581		0.577941	0.467721	0.336568	0.572097	0.487535	1.83771	1.52975	1.78774	1.25949	mainlib	824
Phenylpyruvic acid (1MEOX) (1TMS) MP	2.81251	2.37989	2.44302	2.70948	1.71208	1.16844	1.98649		2.99909	3.04592	2.93086	1.99224	4.22487		3.44269	2.93273	gmd_var_alk_mz_all_2011	823
Etoxeridine	15.6477		15.6746			28.8517		13.8715	30.7592	24.6124	29.3379	23.1678	6.39337	5.07441	5.7194	2.59567	mainlib	822
Phosphoric acid (3TMS)	31.0826	26.3514	37.0955	27.1178	23.8812			23.5194	28.7711	26.4257	30.579	27.1263	37.7742	44.2599	42.9835	33.376	gmd_pred_mosys-ri	820
Hexanedioic acid, bis(2-ethylhexyl) ester	5.14054	4.48961	6.04433	4.41087	4.45364				5.62098	4.39008	5.07172	3.84529	5.33017	4.32395	4.66908	4.10204	mainlib	820
Uridine (4TMS)	8.17312	6.97956	6.85471	5.9823	7.68554	10.5735	8.89217	4.73989	10.422	8.76421	10.8841	8.38032	20.6661	17.115	18.5746	14.4169	gmd_pred_mosys-ri	820
Carbodiimide (2TMS)	0.0600237	0.0425758	0.105126	0.0398507	0.0808165	0.106595	0.0508244	0.0335872	0.0599582	0.0749062		0.0431364	0.127747	0.133095	0.0934107	0.0883813	gmd_pred_mosys-ri	818
Cadaverine, 4TMS derivative	17.5655	13.8742	16.213	15.6446	20.6843	24.4108	18.4581	13.7702	16.0623	16.7275	11.8457	13.1505	25.629	18.0333	20.9112	17.496	mainlib	817
N-Acetyl-D-galactosamine, (isomer 2), 4TMS derivative	0.113746	0.0846735	0.10965	0.0807996	0.245462		0.192733		0.241565	0.104825	0.0211368	0.103464	1.28264	1.03835	0.930744	0.795032	mainlib	817
L-Isoleucine, 2TMS derivative	1.27478	1.62528	2.00131	0.952702	2.6847	3.21174	2.29236	2.21647	6.56566	6.18121			12.2016	13.9848	15.075	13.1153	mainlib	804
Ornithine-1,5-lactam (2TMS)	0.191072	0.156836	0.193155		0.123185	0.154294		0.1134	0.140198	0.11109	0.221342	0.0806804	0.23307	0.188453	0.219017	0.173938	gmd_var_alk_mz_all_2011	804
Adenosine (3TMS)	1.01619	1.0318	0.830778	0.853985	0.595363	1.09662	0.802297		1.60118	1.45952	1.94154	3.20001	5.47947		4.63096	8.6491	gmd_var_alk_mz_all_2011	797
Valine, N-methyl-N-methoxycarbonyl-, octyl ester	0.0751793	0.0690205	0.0849229	0.0574145	0.0742211	0.0900015	0.081813	0.0472825	0.138712	0.134116	0.137697	0.112485	0.313557	0.29343	0.343115	0.204702	mainlib	795
Putrescine (4TMS)	17.0517	12.8119	13.9678	14.5672	18.4087	20.6475	15.7799	10.1288	19.5568	18.5574	14.786	13.3142	21.6465	14.3856	16.7879	14.4446	gmd_pred_mosys-ri	793
Disiloxane, hexamethyl-	0.116505	0.0953871	0.100351			0.0702031	0.12871	0.0540245	0.202679		0.219145	0.135167	0.933185	0.674552	0.911734	0.370023	mainlib	788
Homocysteine (3TMS)	0.264064	0.190466	0.193563	0.214223	0.169408	0.23132	0.145043		0.281425	0.216835	0.190028	0.165188	0.501186	0.494789	0.505141	0.471287	gmd_var_alk_mz_all_2011	787
Benzenepropanoic acid, ?-(methoxyimino)-4-[(trimethylsilyl)oxy]-, trimethylsilyl ester	2.57852	2.08738	1.90376	2.35024	2.08332	1.76129	1.92158	0.955406	3.84969	4.15448	2.79135	2.5825	6.68415	4.69043	5.08554	3.90808	mainlib	781
Succinic semialdehyde (1MEOX) (1TMS) BP	0.171109	0.44788		0.121161			0.146669	0.305535	0.381363	0.103216	0.101655	0.119065	0.203454	0.154271	0.257472		gmd_var_alk_mz_all_2011	779
Unknown 14	1.64517	1.39946	1.65247	1.27907	1.03602	1.40531	0.879935	0.778499	0.578468	0.449025	0.662194	0.598576			1.44064	1.11041	gmd_pred_mosys-ri	773
5'-Methylthioadenosine, 3TMS derivative	3.52761	2.95028	3.34365	2.83586	2.99826	4.31983	2.89787	1.99949	3.17432	2.60844	2.52237	1.90243	5.1576	3.76215	3.99523	2.02898	mainlib	773
Glycine (3TMS)	7.65357	11.9213	7.97636	4.94453	4.82345	5.59284	5.24118	3.33176	8.50302	6.63263	7.54315	6.52525	12.8328	9.38017	9.63127	15.96	gmd_pred_mosys-ri	770
Cycloheptasiloxane, tetradecamethyl-	0.0457748	0.0486686	0.0767187	0.0556154	0.0729209		0.114774	0.064762	0.0442497	0.177423	0.0508555	0.092408	0.155142	0.0364614	0.144515	0.109577	mainlib	769
Hypoxanthine (2TMS)	0.558784	0.344754	0.267122		0.402646	0.405522		0.24543	0.990575	0.623654	0.571898			0.87185	0.957437	0.85881	gmd_var_alk_mz_all_2011	767
Sucrose, 8TMS derivative	18.1423	15.5735			17.2584	21.2741	16.1645	13.6417	23.4865		22.4986	4.36676	7.15643	24.2538	6.31128	6.07472	mainlib	766
Pipecolic acid, N-ethoxycarbonyl-, dodecyl ester	0.189472	0.162931	0.169458	0.121125	0.213138	0.25057	0.150359		0.229585	0.235523	0.129885	0.090972	0.442395	0.328539	0.283611	0.310897	mainlib	765
Allantoin (4TMS)	0.808545	0.666495	0.719015	0.668917	0.713598	0.904693	0.738258	0.339491	1.00523	0.920421	0.704589	0.546542	1.83024	1.13061	1.2979	1.14758	gmd_pred_mosys-ri	762
Indole-3-lactic acid, 3TMS derivative	0.802051	0.700932	0.583013	0.68387	1.21414	0.936953	0.916225	0.44434	1.07653	1.0412	0.752112	0.693967	1.95555	1.28121	1.5135	1.42091	mainlib	757
l-Leucine, N-methyl-N-(2-methoxyethoxycarbonyl)-, dodecyl ester		0.120914	0.181069	0.087262	0.127404	0.154303	0.114725	0.0791937	0.32262	0.220468	0.212827	0.293745	0.610699	0.4877	0.422884	0.463111	mainlib	755
Indole-3-pyruvic acid (1MEOX) (2TMS) MP		1.75146	1.93098	1.88329	1.72827	1.40518	1.00194	0.756459	0.916966	1.12753	0.7409	0.767369	2.07384	0.755017	1.20191	1.02001	gmd_var_alk_mz_all_2011	751
Phosphoric acid, 3-(methoxyimino)-2-[(trimethylsilyl)oxy]propyl bis(trimethylsilyl) ester	0.171592	0.148455	0.15296	0.131315			0.181891	0.0921862	0.215705	0.0554955	0.0683654		0.290614		0.286239	0.211037	mainlib	744
Silane, diethylbutoxypentyloxy-	0.0738309	0.061871	0.0570102		0.0689458	0.0684023	0.0643811		0.109728	0.0701736	0.0844575	0.0788301	0.573489	0.420434	0.415782		mainlib	741
DL-Alanine, N-methyl-N-(byt-3-en-1-yloxycarbonyl)-, byt-3-en-1-yl ester	0.277356	0.0957218		0.176191	0.24568		0.252204		0.299451	0.178299	0.184378	0.106866	0.297278	0.141728	0.175505	0.151616	mainlib	740
{4-Methoxy-2-[(trimethylsilyl)oxy]phenyl}{2-[(trimethylsilyl)oxy]phenyl}methanone	0.0560896	0.0481705		0.0496128			0.0547241	0.0263383	0.043147	0.0569896	0.0716257	0.0621363	0.0930199	0.164589	0.146857	0.07467	mainlib	738
Glutamine, DL- (3TMS)	2.49969		1.39591	1.63386	5.41065	7.63584	5.8053	4.07685	14.6318	12.0526	13.6499	8.94206	13.3691	13.3072	14.4308	10.3337	gmd_pred_mosys-ri	736
Glucose-6-phosphate (1MEOX) (6TMS) MP	11.2099	10.0036	9.3381	10.3704	7.85456	12.6818	9.24211	6.08887	11.0779	7.75213	12.7811	11.3062	32.6998	29.5826	19.332	15.6017	gmd_pred_mosys-ri	734
unknown 28	0.181567	0.153072	0.246075	0.159314	0.0615706	0.102907	0.090069	0.0507815	0.277444	0.143029	0.226036	0.276946	0.561431	0.445806	0.403408	0.408094	gmd_pred_mosys-ri	724
Monomethyl succinate, trimethylsilyl ester	0.886748	0.653442		0.691104	1.04817		0.794152	0.51582		1.04467	0.808364	0.646174	2.29477		1.29969	1.39737	mainlib	721
Bernzothiazole, 2-[2-(2-fluorophenoxy)ethylthio]-	0.603874	0.49602	0.672011	0.498863	0.537125	0.060301	0.0403918		0.672323	0.548013	0.616607	0.44774	0.730242	0.603669	0.660844	0.53485	mainlib	720
D-Mannose, 2,3,4,5-tetrakis-O-(trimethylsilyl)-, O-methyloxime, 6-[bis(trimethylsilyl) phosphate]	11.1988	9.99371	9.32901	10.3599	7.8466	12.6693	9.23295	6.08297	11.067	7.74452	12.7681	11.2946	32.6591	29.546	29.0758	15.5825	mainlib	720
unknown 29	0.128835	0.101572		0.0912289	0.264336	0.466869	0.175029	0.11106	0.58122	0.541434	0.430511	0.595468		2.83586	2.50709	2.04136	gmd_pred_mosys-ri	719
Ornithine, N2-acetyl- (3TMS)	0.772087	0.603375	0.622843	0.730922	0.928262	1.02519	0.901084	0.599347	1.03659	0.952045	0.76077	0.811992	2.60934	1.53983	1.80305	1.69821	gmd_pred_mosys-ri	716
Cyclodecasiloxane, eicosamethyl-	0.323029	0.402785	0.784541	0.396392	0.842879	0.854495	0.439642	0.302737		0.93485	0.496528	0.89587	1.62389	0.189435	1.43164		mainlib	708

## Sheet: internal standard
Metabolite	3h V1	3h V2	3h V3	3h V4	6h V1	6h V2	6h V3	6h V4	3h C1	3h C2	3h C3	3h C4	6h C1	6h C2	6h C3	6h C4	Medium	Library	Similarity
2-Ethylhexanal ethylene glycol acetal	7.15577	9.11535	14.09	6.13325	18.0741	32.1397	14.2879	15.5092	22.3175	18.5332	19.9492	14.0002	34.8538	29.0543	31.6096	27.967	0.0335546	mainlib	812
Valine (2TMS)	8.36331	8.18763	12.5515	6.01847	15.2993		11.8039	10.1721	17.3307	12.2066	13.1169	15.4942	44.8375	21.1851	23.4902	26.4654	0.0335883	gmd_pred_mosys-ri	917
L-Lysine, 4TMS derivative	14.2101	12.4928	15.1977	9.11141	10.763	14.5994	12.3339	8.54093	17.7893	13.6445	17.9527	13.1501	22.8666	20.4697	20.5179	17.143	0.0351845	mainlib	839
L-Proline, 2TMS derivative	13.6497	15.8138	29.7819	11.0927	36.9256		24.7777	26.1072	37.6186	31.371	33.7354	23.7418	85.793	50.8784	53.8132	49.5615	0.0918783	mainlib	896
Adenosine, 4TMS derivative	20.9167	17.4488	18.9917	14.498	18.2595	21.6278	18.1076	12.5242	25.0682	19.3275	22.4315	19.587	42.4041	32.8455	35.7091	30.8276	0.0665034	mainlib	875
L-Glutamic acid, 3TMS derivative	15.6528	13.2698	15.6795	11.601	20.8565	28.8614	19.004	13.8765	30.7713	24.6225	29.3491	23.177	19.1275	9.32535	8.87502		0.139971	mainlib	897
Unknown 4	43.7825	11.8596	56.9398	39.9892	31.7528	51.6303	31.7133	28.2766	24.1152	22.9945	25.4177	20.9385	0.955752	20.5916	20.6091	18.633	0.2075	gmd_var_alk_mz_all_2011	876
Pyrophosphate (4TMS)	5.43135	3.40525	2.78333	3.98741	3.3336	3.69736	4.3779	1.77438	2.21268		3.37265	2.14589	6.32543	5.87483	6.63174	4.43053	0.0372135	gmd_pred_mosys-ri	894
Adenosine-5-monophosphate (4TMS)	2.33141	3.35738	2.88375	3.47402	3.62201	8.64927	6.48366	1.21832	3.65732	4.45902	5.29434	4.23138	12.2779	3.30849	12.0381	6.61655	0.0679947	gmd_var_alk_mz_all_2011	912
Citric acid, 4TMS derivative	21.9883	17.7234	20.1399	17.8046	11.3365	14.4013	13.4139	9.09394	7.31778	6.06134	4.86938	4.12397	8.16032	5.00158	5.77887	5.61634	0.196522	mainlib	768
Butanedioic acid, 2TMS derivative	20.3318	17.2812	18.4507	15.0734	19.9171	24.7614	18.7981	13.8373		19.6644	23.2689	20.147	40.2425	30.3807	31.6925	27.1213	0.47114	mainlib	839
Ethanol, 2-butoxy-, phosphate (3:1)	1.98814	2.15451	2.56345	1.90525	2.12882	0.24502	0.188805		3.25117	2.65503	3.00326	2.50847	3.05545	3.13347	3.11002	2.33149	0.0905506	mainlib	875
Methylal	1.81848	0.216564	1.47776	1.42331	1.85412		1.69208	0.752139	3.29934	2.18817	2.75003	2.05733	4.57695	4.34455	4.39524	8.36751	0.149068	mainlib	753
Fumaric acid (2TMS)	3.65199	2.77954	3.31696	2.72573	4.20757	4.12571	3.14673	1.62254	7.09925	6.25728	5.31609	4.09043	10.6007	8.68333	8.75604	8.95932	0.292107	mainlib	905
Benzenemethanol, 2-chloro-?-[[(1-methylethyl)amino]methyl]-		0.342519		0.245868	0.197031		0.189518		1.10929	1.41274	0.404488	0.311146	0.431465	0.982412	2.98743	0.520791	0.0455139	mainlib	744
Unknown 17	1.99348	1.89587	2.30668	1.8196	1.97907	0.22089	0.202388	0.356139	2.73386	2.60115	3.63886	2.96088	2.73092	2.72242	2.37764	0.798724	0.124165	gmd_pred_mosys-ri	766
Unknown 13	1.8395	1.6071	2.17956	1.58574	1.67344	0.186709	0.12113	0.0646364	2.04872	1.62718	1.95132	1.43511	2.25015	1.80036	1.96928	1.70661	0.097108	gmd_pred_mosys-ri	792
Benzothiazole, 2-(2-hydroxyethylthio)-	8.67961	7.30207	9.84909	7.29288	7.40308	1.01839	0.754248	0.360525	9.65617	7.79739	8.44963	6.30679	9.16543	7.63676	8.42944	6.83527	0.5794	mainlib	741
Butylated Hydroxytoluene, TMS derivative	5.45677	4.33121	5.41349	4.25533	4.46822	0.498664	0.315963	0.237515	6.64397	5.7314		4.3997	6.88473	5.93117	6.75931	4.86619	0.392127	mainlib	858
Adenine (2TMS)	7.25895	6.03439	6.9014	5.15059	5.37078	6.29041	5.66799	3.63548	7.71001	6.02991	5.33056	5.18321	11.2979	8.68283	9.17191	8.02678	0.614051	mainlib	914
Phosphoric acid, bis(trimethylsilyl)monomethyl ester	0.806689	0.58376	0.396379	0.655521	0.443376		0.665561	0.319877	0.590871	0.576502	0.571962	0.463448	0.796163	0.671837	0.768997	0.507174	0.0578514	mainlib	782
unknown 25	1.49341	0.932893	1.01809	1.01779	1.21468	0.85351	0.685929	0.426572	0.764225		0.565171	0.337415	1.31798	0.666683	0.766941	0.771157	0.133411	gmd_pred_mosys-ri	740
Uracil (2TMS)	5.19357	4.4337	5.30435	3.74629	5.50997	6.31772	5.26189	3.69942	6.37415	4.68048	5.37954	4.71748	9.80837	7.82955	8.10039	6.39547	1.00462	gmd_var_alk_mz_all_2011	883
2-Butenedioic acid, (Z)-, 2TMS derivative	2.10428	1.27882	3.05118	1.3625	3.74197	4.67972	1.87074	0.794744	3.20683	2.72092	1.85585	1.47465	8.66513	4.07369	3.91451	3.97073	0.531928	mainlib	837
L-Threonine, 3TMS derivative	12.4733	10.1277	13.6235	9.11407	11.761	14.1984	10.9023	7.46484	18.0771	15.3199	16.8771	13.9966	26.621	19.3359	20.3109	17.6264	0	mainlib	929
L-Leucine, TMS derivative	3.33876	1.69509		1.81353	0.393378		2.2756		6.25494	4.50057	8.87965	8.54087	2.78324	11.7201	12.9276		0	mainlib	923
Maltose (1MEOX) (8TMS) BP	0.466934	0.385357	0.263217	0.411885	0.468394	0.612269	0.420498	0.234531	0.510497	0.332952	0.443195	0.42997	2.20251	1.70418	1.49967	1.22205	0	gmd_pred_mosys-ri	920
Ribose	4.54697	3.31582	2.63965	2.80856	2.78986	2.92801	3.77934	1.98541	5.77186	3.67519	6.99214	5.60552	20.5413	17.4508	19.5885	13.3746	0	mainlib	915
Trehalose (8TMS)	18.2709	15.686			17.3927	21.433	16.2817	13.7369	23.6033		22.6444	18.8458	30.8034	24.4797	25.1753	24.2471	0	gmd_pred_mosys-ri	915
Phenylalanine, 2TMS derivative	4.12426	3.95894	3.05332	2.78528	2.49226	2.70236	4.19402	2.17045	9.20827	6.34632	8.73571	8.02591	15.6554	16.6087	17.6339	13.6543	0	mainlib	914
Unknown 1	1.72634	1.55175	1.37654	1.38062	1.9844	2.7912	2.54097	1.38241	1.27023	1.13266	1.3602	1.42141	3.07941	3.05043	3.10867	2.16536	0	gmd_var_alk_mz_all_2011	911
2-Ketoisocaproic acid (1TMS)	4.72452	3.4418	4.448	4.25418	4.57727		3.81616	1.94793	7.53998	6.99867	6.36256	5.59981	17.7836	7.39206	8.50727	5.95984	0	mainlib	909
Asparagine (3TMS)	5.43135	3.40525			3.3336	3.69736	4.3779		2.21268	4.19295	3.37265	2.14589	6.32543	5.87483	6.63174	4.43053	0	gmd_var_alk_mz_all_2011	903
7-(Trimethylsilyl)-2,6-bis[(trimethylsilyl)oxy]-7H-purine	5.32875	4.34689	3.82479	2.4745	4.38023		5.02374	2.42901	4.16264	3.03433	3.30059	2.91274	10.4934	9.57174	10.2364	7.34856	0	mainlib	902
Dihydroxyacetone phosphate (1MEOX) (3TMS)	1.54395	1.18582	1.02966	0.981016	1.089	1.23847	1.6581	1.04289	1.38932	1.40924	1.72693	1.26578	5.49435	4.26833	6.01997	4.20731	0	gmd_var_alk_mz_all_2011	899
Glucose-6-phosphate, 2-amino-2-deoxy- (6TMS)				0.103459	0.164388	0.255596	0.24258	0.112197	0.554065	0.476278	1.11899	0.523848	4.08346	4.29132	3.97951	1.68908	0	gmd_pred_mosys-ri	899
Homoserine (3TMS)	0.616187	0.523945	0.466852	0.386482	0.637897	0.991226	0.575208	0.321488	1.71967	1.61051	1.8501	1.45546	3.94569	3.27231	3.32251	2.37452	0	gmd_pred_mosys-ri	898
Uridine 5'-monophosphate (5TMS)	2.86861	2.60931	1.80418	2.21132	1.33058	3.77257	3.717	2.07261	0.972242	2.25922	1.32112	2.02257	1.60344	0.955947	1.44722	0.790293	0	gmd_var_alk_mz_all_2011	898
2,2'-Bipyrrolidine	18.2995	8.44508		10.5192	4.96853		19.8384	0.370773	36.1615	23.4197	35.4992	31.4446	22.4926	39.3008	33.8481		0	mainlib	894
Pyrrole-2-carboxylic acid (2TMS)	0.301782	0.233038		0.189118	0.575025	0.642441	0.362767	0.235725	1.13958	1.07397	0.947105	0.922413	2.28219	2.20676	2.13123	1.72058	0	gmd_var_alk_mz_all_2011	892
Glycyl-proline (3TMS)	0.149164	0.135667	0.146609	0.125575	0.330484	0.380008	0.324821	0.194695	0.411858	0.355709	0.371782	0.755105	4.84712	3.82018	4.21297	3.56169	0	gmd_var_alk_mz_all_2011	892
Malic acid (3TMS)	5.36471	3.89685	3.42391	3.47867	4.60159	4.5511	4.88077	2.54702	8.42514	7.94027	7.46996	6.45133	13.6208	10.0804	11.8433	8.86519	0	gmd_pred_mosys-ri	890
Unknown 32	12.3491	8.79266	9.28014	8.34407	9.1608	9.13991	9.13965	5.11209	18.2603	14.9664	15.8718	11.5188	9.09679	7.91998	8.35201	8.03276	0	gmd_pred_mosys-ri	889
Tyrosine (3TMS)	2.8393	2.54981	2.23185	1.74955	3.25858	4.19627	3.79862	2.06757	9.33223	7.10025	9.24797	8.17413	19.4892	16.8422	18.6417	15.5348	0	gmd_pred_mosys-ri	889
Spermidine (5TMS)	3.35542	2.71922	3.71152	2.88616	2.49443	3.1817	3.07134	1.53046	6.88022	3.26946	4.66462	2.53848	3.91345	2.77345	2.9816	2.34497	0	gmd_pred_mosys-ri	888
Alanyl-alanine (2TMS)	2.50784	2.15834	1.83711	1.7675	1.38131	1.45761	1.52732	0.834961	3.12874	2.8095	2.62784	2.40338	7.50883	6.47927	6.40786	5.5465	0	gmd_var_alk_mz_all_2011	887
Butanoic acid, 4-amino- (3TMS)	0.826082	0.665673	0.699998	0.604574	1.39261	1.55186	1.14949	0.680145	2.39791	1.93607	2.11439	2.30599	7.439	5.82308	6.20862	4.66089	0	gmd_var_alk_mz_all_2011	886
Proline [+CO2] (2TMS)	1.63522	1.25353	3.35462	1.34906	3.73243	1.85112	1.98155	1.01809	11.3828	6.06027	9.61721	11.1943	12.3651	11.5829	14.1399	10.5484	0	gmd_var_alk_mz_all_2011	886
Pentanoic acid, 2-(methoxyimino)-3-methyl-, trimethylsilyl ester	1.36652	0.344238		1.34032	0.467716		0.945694	0.683548	2.11671	3.07013	2.31571	2.09823	3.2219	2.70191	3.42379	2.59308	0	mainlib	756
Leucine (2TMS)	3.66342	3.77696	14.5224	2.17725	8.75144	16.3016	4.46042	3.80805	7.52121	5.51897	5.36767	5.55979	33.9332	14.3193	15.5199	15.9785	0	gmd_pred_mosys-ri	884
Glucose-6-phosphate (1MEOX) (6TMS) BP	2.72896	2.60714	1.38806	2.68401	1.42669	3.52891	1.72942	0.916749	2.46099	1.20853	2.23949	2.59253	13.2805	11.9768	11.9424	9.21508	0	gmd_var_alk_mz_all_2011	884
3-Methyl-2-oxopentanoic-acid_2_1MeOX_1TMS	0.618054	0.384342		0.511685	0.571359		0.471216	0.209827	1.11729	0.965138	0.731578	0.63183	1.12877	0.771221	0.928816	0.669967	0	gmd_var_alk_mz_all_2011	881
beta-Alanine, 3TMS derivative	0.029846	0.0244257	0.01827	0.0233862	0.433973	0.368685	0.535516	0.324406	0.227745	0.20932	0.224847	0.974871	3.72834	3.08116	3.21866	2.47442	0	mainlib	881
Glutamine (4TMS)	0.496458	0.585902		0.306081	0.970311	1.92515	1.73041	0.980903	6.57668	6.16109	7.47399	2.99085	6.98768	6.33227	8.44699	6.66907	0	gmd_var_alk_mz_all_2011	880
Hexasiloxane, tetradecamethyl-	2.3234	2.13524	2.42492	2.45759	2.43912	3.00628	3.70524	2.32672	2.15091	5.14097	2.16499	3.05842	5.6141	2.00328	4.87249	3.54251	0	mainlib	879
Lumichrome (2MEOX)	1.45348	1.0572	1.0098	1.09165	1.21977	3.38003	1.04115	0.606334	1.12481	1.07015	0.997743	0.982348	1.93446	1.65848	1.6222	1.27134	0	gmd_var_alk_mz_all_2011	875
Glyceric acid-3-phosphate (4TMS)	0.266945	0.226905	0.883938	0.52649	0.647894	0.420179	0.537768	0.195413	0.362692	0.631735	0.517506	0.447043	1.53104	0.531023	0.712461	0.862341	0	gmd_var_alk_mz_all_2011	870
L-Cysteine, 3TMS derivative				0.464847	0.33256	0.177402	0.493018	0.179829	0.473485		0.50149	0.431958	0.847472	0.991493	1.03547	0.660077	0	mainlib	868
L-Methionine, 2TMS derivative	2.72957	2.55988	3.18542	1.66884	3.06225	5.81674	3.27839	1.92515	5.70867	4.07198	5.6582	3.79901	12.1045	9.59589	10.435	9.55922	0	mainlib	861
L-Ornithine, 4TMS derivative	11.5185	10.0373	12.5274	7.92568	7.54981	10.657	9.34199	6.07561	15.2257	11.4156	15.3829	10.7832	18.1307	15.9902	16.2781	13.2093	0	mainlib	858
Thymidine-5'-monophosphoric-acid_3TMS	0.36381	0.282803	0.290575	0.259437	0.232844	0.385793	0.294591	0.183574	0.331703	0.301875	0.321603	0.32084	0.967828	0.686319	0.809268	0.66755	0	gmd_var_alk_mz_all_2011	740
Unknown 6	0.142832	0.198228			0.0872558		0.121033	0.115685	0.387383	0.187015	0.382487	0.383851	1.61612	0.971871	1.20843	0.890207	0	gmd_pred_mosys-ri	856
L-Glutamic acid, bis(trimethylsilyl) ester	2.10729	0.531454	0.457489	0.849241			2.17243	0.304187	5.99564	5.37043	7.22524	5.30038	2.75868	10.1579	10.9397	1.90077	0	mainlib	853
Ribulose-5-phosphate (1MEOX) (5TMS) BP	1.05745	0.706818	0.734522	0.71924	0.604842	1.00891	0.919398	0.376704	0.928454	0.505326	0.975709	0.551244	2.03245	3.16512	2.05893	1.00974	0	gmd_var_alk_mz_all_2011	850
Glyceryl-glycoside TMS ether	0.219065	0.17659	0.16182	0.129686	0.0424516	0.116136	0.15651	0.120135	0.219235	0.127556	0.18123	0.165901	0.488502	0.427163	0.416525	0.391003	0	mainlib	850
L-Lysine, 3TMS derivative	1.16137	0.413139	0.225274				0.781048		1.36354	1.24671	1.67085	0.927033	1.42517	2.58933	2.73333	0.353052	0	mainlib	848
Pentanedioic acid, 2-(methoxyimino)-, bis(trimethylsilyl) ester	4.98384	3.48209	2.42434	3.3788	6.85397	3.99479	5.85139	2.72144	12.0788	10.3984	8.03501	7.23237	10.3526	6.99659	10.3334	8.061	0	mainlib	846
Proline (1TMS)	18.3136	8.45027		10.5257	4.97133		19.8603	0.371287		23.4493	35.4937	31.4413	22.514	33.405	33.8466		0	gmd_var_alk_mz_all_2011	840
Nicotinamide (1TMS)	7.38233	6.55599	8.63112	8.0377	5.65996	5.80201	6.55146	3.87431	7.24256	5.98093	5.60216	4.72483	7.81624	6.73882	7.21622	5.79038	0	gmd_var_alk_mz_all_2011	840
Butanoic acid, 4-methylthio-2-oxo- (1MEOX) (1TMS) MP	0.863833	0.63985	0.553573	0.77926	1.10771	1.17072		0.629148	2.53713	2.82328	2.03171	1.8639	3.89224	2.42613	2.98847	1.9472	0	gmd_var_alk_mz_all_2011	830
Phosphoric acid, bis(trimethylsilyl) 2,3-bis[(trimethylsilyl)oxy]propyl ester	0.667588	1.18854	1.31603	0.908072	0.383838	0.878581		0.577941	0.467721	0.336568	0.572097	0.487535	1.83771	1.52975	1.78774	1.25949	0	mainlib	824
Phenylpyruvic acid (1MEOX) (1TMS) MP	2.81251	2.37989	2.44302	2.70948	1.71208	1.16844	1.98649		2.99909	3.04592	2.93086	1.99224	4.22487		3.44269	2.93273	0	gmd_var_alk_mz_all_2011	823
Etoxeridine	15.6477		15.6746			28.8517		13.8715	30.7592	24.6124	29.3379	23.1678	6.39337	5.07441	5.7194	2.59567	0	mainlib	822
Phosphoric acid (3TMS)	31.0826	26.3514	37.0955	27.1178	23.8812			23.5194	28.7711	26.4257	30.579	27.1263	37.7742	44.2599	42.9835	33.376	0	gmd_pred_mosys-ri	820
Hexanedioic acid, bis(2-ethylhexyl) ester	5.14054	4.48961	6.04433	4.41087	4.45364				5.62098	4.39008	5.07172	3.84529	5.33017	4.32395	4.66908	4.10204	0	mainlib	820
Uridine (4TMS)	8.17312	6.97956	6.85471	5.9823	7.68554	10.5735	8.89217	4.73989	10.422	8.76421	10.8841	8.38032	20.6661	17.115	18.5746	14.4169	0	gmd_pred_mosys-ri	820
Carbodiimide (2TMS)	0.0600237	0.0425758	0.105126	0.0398507	0.0808165	0.106595	0.0508244	0.0335872	0.0599582	0.0749062		0.0431364	0.127747	0.133095	0.0934107	0.0883813	0	gmd_pred_mosys-ri	818
Cadaverine, 4TMS derivative	17.5655	13.8742	16.213	15.6446	20.6843	24.4108	18.4581	13.7702	16.0623	16.7275	11.8457	13.1505	25.629	18.0333	20.9112	17.496	0	mainlib	817
N-Acetyl-D-galactosamine, (isomer 2), 4TMS derivative	0.113746	0.0846735	0.10965	0.0807996	0.245462		0.192733		0.241565	0.104825	0.0211368	0.103464	1.28264	1.03835	0.930744	0.795032	0	mainlib	817
L-Isoleucine, 2TMS derivative	1.27478	1.62528	2.00131	0.952702	2.6847	3.21174	2.29236	2.21647	6.56566	6.18121			12.2016	13.9848	15.075	13.1153	0	mainlib	804
Ornithine-1,5-lactam (2TMS)	0.191072	0.156836	0.193155		0.123185	0.154294		0.1134	0.140198	0.11109	0.221342	0.0806804	0.23307	0.188453	0.219017	0.173938	0	gmd_var_alk_mz_all_2011	804
Adenosine (3TMS)	1.01619	1.0318	0.830778	0.853985	0.595363	1.09662	0.802297		1.60118	1.45952	1.94154	3.20001	5.47947		4.63096	8.6491	0	gmd_var_alk_mz_all_2011	797
Valine, N-methyl-N-methoxycarbonyl-, octyl ester	0.0751793	0.0690205	0.0849229	0.0574145	0.0742211	0.0900015	0.081813	0.0472825	0.138712	0.134116	0.137697	0.112485	0.313557	0.29343	0.343115	0.204702	0	mainlib	795
Putrescine (4TMS)	17.0517	12.8119	13.9678	14.5672	18.4087	20.6475	15.7799	10.1288	19.5568	18.5574	14.786	13.3142	21.6465	14.3856	16.7879	14.4446	0	gmd_pred_mosys-ri	793
Disiloxane, hexamethyl-	0.116505	0.0953871	0.100351			0.0702031	0.12871	0.0540245	0.202679		0.219145	0.135167	0.933185	0.674552	0.911734	0.370023	0	mainlib	788
Homocysteine (3TMS)	0.264064	0.190466	0.193563	0.214223	0.169408	0.23132	0.145043		0.281425	0.216835	0.190028	0.165188	0.501186	0.494789	0.505141	0.471287	0	gmd_var_alk_mz_all_2011	787
Benzenepropanoic acid, ?-(methoxyimino)-4-[(trimethylsilyl)oxy]-, trimethylsilyl ester	2.57852	2.08738	1.90376	2.35024	2.08332	1.76129	1.92158	0.955406	3.84969	4.15448	2.79135	2.5825	6.68415	4.69043	5.08554	3.90808	0	mainlib	781
Succinic semialdehyde (1MEOX) (1TMS) BP	0.171109	0.44788		0.121161			0.146669	0.305535	0.381363	0.103216	0.101655	0.119065	0.203454	0.154271	0.257472		0	gmd_var_alk_mz_all_2011	779
Unknown 14	1.64517	1.39946	1.65247	1.27907	1.03602	1.40531	0.879935	0.778499	0.578468	0.449025	0.662194	0.598576			1.44064	1.11041	0	gmd_pred_mosys-ri	773
5'-Methylthioadenosine, 3TMS derivative	3.52761	2.95028	3.34365	2.83586	2.99826	4.31983	2.89787	1.99949	3.17432	2.60844	2.52237	1.90243	5.1576	3.76215	3.99523	2.02898	0	mainlib	773
Glycine (3TMS)	7.65357	11.9213	7.97636	4.94453	4.82345	5.59284	5.24118	3.33176	8.50302	6.63263	7.54315	6.52525	12.8328	9.38017	9.63127	15.96	0	gmd_pred_mosys-ri	770
Cycloheptasiloxane, tetradecamethyl-	0.0457748	0.0486686	0.0767187	0.0556154	0.0729209		0.114774	0.064762	0.0442497	0.177423	0.0508555	0.092408	0.155142	0.0364614	0.144515	0.109577	0	mainlib	769
Hypoxanthine (2TMS)	0.558784	0.344754	0.267122		0.402646	0.405522		0.24543	0.990575	0.623654	0.571898			0.87185	0.957437	0.85881	0	gmd_var_alk_mz_all_2011	767
Sucrose, 8TMS derivative	18.1423	15.5735			17.2584	21.2741	16.1645	13.6417	23.4865		22.4986	4.36676	7.15643	24.2538	6.31128	6.07472	0	mainlib	766
Pipecolic acid, N-ethoxycarbonyl-, dodecyl ester	0.189472	0.162931	0.169458	0.121125	0.213138	0.25057	0.150359		0.229585	0.235523	0.129885	0.090972	0.442395	0.328539	0.283611	0.310897	0	mainlib	765
Allantoin (4TMS)	0.808545	0.666495	0.719015	0.668917	0.713598	0.904693	0.738258	0.339491	1.00523	0.920421	0.704589	0.546542	1.83024	1.13061	1.2979	1.14758	0	gmd_pred_mosys-ri	762
Indole-3-lactic acid, 3TMS derivative	0.802051	0.700932	0.583013	0.68387	1.21414	0.936953	0.916225	0.44434	1.07653	1.0412	0.752112	0.693967	1.95555	1.28121	1.5135	1.42091	0	mainlib	757
l-Leucine, N-methyl-N-(2-methoxyethoxycarbonyl)-, dodecyl ester		0.120914	0.181069	0.087262	0.127404	0.154303	0.114725	0.0791937	0.32262	0.220468	0.212827	0.293745	0.610699	0.4877	0.422884	0.463111	0	mainlib	755
Indole-3-pyruvic acid (1MEOX) (2TMS) MP		1.75146	1.93098	1.88329	1.72827	1.40518	1.00194	0.756459	0.916966	1.12753	0.7409	0.767369	2.07384	0.755017	1.20191	1.02001	0	gmd_var_alk_mz_all_2011	751
Phosphoric acid, 3-(methoxyimino)-2-[(trimethylsilyl)oxy]propyl bis(trimethylsilyl) ester	0.171592	0.148455	0.15296	0.131315			0.181891	0.0921862	0.215705	0.0554955	0.0683654		0.290614		0.286239	0.211037	0	mainlib	744
Silane, diethylbutoxypentyloxy-	0.0738309	0.061871	0.0570102		0.0689458	0.0684023	0.0643811		0.109728	0.0701736	0.0844575	0.0788301	0.573489	0.420434	0.415782		0	mainlib	741
DL-Alanine, N-methyl-N-(byt-3-en-1-yloxycarbonyl)-, byt-3-en-1-yl ester	0.277356	0.0957218		0.176191	0.24568		0.252204		0.299451	0.178299	0.184378	0.106866	0.297278	0.141728	0.175505	0.151616	0	mainlib	740
{4-Methoxy-2-[(trimethylsilyl)oxy]phenyl}{2-[(trimethylsilyl)oxy]phenyl}methanone	0.0560896	0.0481705		0.0496128			0.0547241	0.0263383	0.043147	0.0569896	0.0716257	0.0621363	0.0930199	0.164589	0.146857	0.07467	0	mainlib	738
Glutamine, DL- (3TMS)	2.49969		1.39591	1.63386	5.41065	7.63584	5.8053	4.07685	14.6318	12.0526	13.6499	8.94206	13.3691	13.3072	14.4308	10.3337	0	gmd_pred_mosys-ri	736
Glucose-6-phosphate (1MEOX) (6TMS) MP	11.2099	10.0036	9.3381	10.3704	7.85456	12.6818	9.24211	6.08887	11.0779	7.75213	12.7811	11.3062	32.6998	29.5826	19.332	15.6017	0	gmd_pred_mosys-ri	734
unknown 28	0.181567	0.153072	0.246075	0.159314	0.0615706	0.102907	0.090069	0.0507815	0.277444	0.143029	0.226036	0.276946	0.561431	0.445806	0.403408	0.408094	0	gmd_pred_mosys-ri	724
Monomethyl succinate, trimethylsilyl ester	0.886748	0.653442		0.691104	1.04817		0.794152	0.51582		1.04467	0.808364	0.646174	2.29477		1.29969	1.39737	0	mainlib	721
Bernzothiazole, 2-[2-(2-fluorophenoxy)ethylthio]-	0.603874	0.49602	0.672011	0.498863	0.537125	0.060301	0.0403918		0.672323	0.548013	0.616607	0.44774	0.730242	0.603669	0.660844	0.53485	0	mainlib	720
D-Mannose, 2,3,4,5-tetrakis-O-(trimethylsilyl)-, O-methyloxime, 6-[bis(trimethylsilyl) phosphate]	11.1988	9.99371	9.32901	10.3599	7.8466	12.6693	9.23295	6.08297	11.067	7.74452	12.7681	11.2946	32.6591	29.546	29.0758	15.5825	0	mainlib	720
unknown 29	0.128835	0.101572		0.0912289	0.264336	0.466869	0.175029	0.11106	0.58122	0.541434	0.430511	0.595468		2.83586	2.50709	2.04136	0	gmd_pred_mosys-ri	719
Ornithine, N2-acetyl- (3TMS)	0.772087	0.603375	0.622843	0.730922	0.928262	1.02519	0.901084	0.599347	1.03659	0.952045	0.76077	0.811992	2.60934	1.53983	1.80305	1.69821	0	gmd_pred_mosys-ri	716
Cyclodecasiloxane, eicosamethyl-	0.323029	0.402785	0.784541	0.396392	0.842879	0.854495	0.439642	0.302737		0.93485	0.496528	0.89587	1.62389	0.189435	1.43164		0	mainlib	708

## Sheet: 70 % valid
Metabolite	3h V1	3h V2	3h V3	3h V4	6h V1	6h V2	6h V3	6h V4	3h C1	3h C2	3h C3	3h C4	6h C1	6h C2	6h C3	6h C4	Medium	Library	Similarity
2-Ethylhexanal ethylene glycol acetal	2065950000	3127100000	3364560000	2094210000	6591530000	9205550000	4993880000	4889900000	6195080000	6575450000	5596190000	5121180000	9977500000	9757840000	10299800000	10191000000	10838428	mainlib	812
Valine (2TMS)	2414580000	2808840000	2997170000	2055020000	5579570000		4125700000	3207170000	4810810000	4330830000	3679580000	5667670000	12835500000	7114980000	7654130000	9643830000	10849298	gmd_pred_mosys-ri	917
L-Lysine, 4TMS derivative	4102610000	4285760000	3629080000	3111110000	3925200000	4181600000	4310920000	2692870000	4938110000	4840970000	5036120000	4810210000	6545960000	6874720000	6685630000	6246800000	11364876	mainlib	839
L-Proline, 2TMS derivative	3940810000	5425080000	7111640000	3787640000	13466600000		8660280000	8231330000	10442500000	11130200000	9463540000	8684580000	24559700000	17087400000	17534700000	18059900000	29677457	mainlib	896
Adenosine, 4TMS derivative	6038880000	5985980000	4535050000	4950370000	6659150000	6194710000	6328950000	3948750000	6958640000	6857250000	6292540000	7164770000	12138900000	11031100000	11635600000	11233400000	21481151	mainlib	875
L-Glutamic acid, 3TMS derivative	4519150000	4552310000	3744110000	3961180000	7606280000	8266570000	6642250000	4375130000	8541750000	8735900000	8233080000	8477970000	5475570000	3131900000	2891870000		45211647	mainlib	897
Unknown 4	12640500000	4068540000	13596700000	13654400000	11580100000	14788100000	11084400000	8915330000	6694100000	8158270000	7130220000	7659150000	273600000	6915650000	6715350000	6789750000	67024110	gmd_var_alk_mz_all_2011	876
Pyrophosphate (4TMS)	1568090000	1168200000	664632000	1361510000	1215750000	1059010000	1530160000	559443000	614215000		946103000	784950000	1810760000	1973050000	2160910000	1614460000	12020287	gmd_pred_mosys-ri	894
Adenosine-5-monophosphate (4TMS)	673105000	1151780000	688612000	1186210000	1320930000	2477350000	2266160000	384124000	1015230000	1582030000	1485180000	1547810000	3514770000	1111150000	3922540000	2411030000	21962860	gmd_var_alk_mz_all_2011	912
Citric acid, 4TMS derivative	6348260000	6080180000	4809210000	6079410000	4134370000	4124870000	4688400000	2867230000	2031330000	2150520000	1365970000	1508520000	2336030000	1679770000	1883010000	2046560000	63478207	mainlib	768
Butanedioic acid, 2TMS derivative	5870010000	5928470000	4405850000	5146860000	7263680000	7092250000	6570300000	4362760000		6976790000	6527430000	7369630000	11520100000	10203300000	10326800000	9882820000	152182012	mainlib	839
Ethanol, 2-butoxy-, phosphate (3:1)	573998000	739125000	612129000	650552000	776369000	70179400	65991000		902486000	941985000	842481000	917581000	874674000	1052370000	1013380000	849580000	29248607	mainlib	875
Methylal	525016000	74294300	352876000	485992000	676190000		591414000	237142000	915859000	776349000	771445000	752558000	1310230000	1459110000	1432160000	3049070000	48150325	mainlib	753
Fumaric acid (2TMS)	1054370000	953544000	792058000	930705000	1534480000	1181700000	1099840000	511571000	1970670000	2220040000	1491280000	1496250000	3034620000	2916280000	2853100000	3264720000	94353004	mainlib	905
Benzenemethanol, 2-chloro-?-[[(1-methylethyl)amino]methyl]-		117504000		83952100	71856200		66240200		307925000	501230000	113468000	113815000	123514000	329941000	973434000	189773000	14701379	mainlib	744
Unknown 17	575540000	650394000	550813000	621308000	721758000	63268000	70738500	112287000	758889000	922871000	1020780000	1083070000	781771000	914319000	774740000	291050000	40106346	gmd_pred_mosys-ri	766
Unknown 13	531083000	551331000	520458000	541454000	610294000	53477900	42337100	20379200	568702000	577312000	547388000	524953000	644142000	604648000	641678000	621879000	31366699	gmd_pred_mosys-ri	792
Benzothiazole, 2-(2-hydroxyethylthio)-	2505900000	2505040000	2351870000	2490170000	2699870000	291690000	263624000	113670000	2680440000	2766460000	2370310000	2306980000	2623760000	2564790000	2746680000	2490730000	187151071	mainlib	741
Butylated Hydroxytoluene, TMS derivative	1575430000	1485860000	1292690000	1452990000	1629540000	142829000	110435000	74886000	1844290000	2033460000		1609380000	1970870000	1991970000	2202480000	1773210000	126660177	mainlib	858
Adenine (2TMS)	2095740000	2070150000	1647990000	1758680000	1958700000	1801720000	1981070000	1146230000	2140210000	2139370000	1495340000	1895980000	3234200000	2916110000	2988610000	2924910000	198343755	mainlib	914
Phosphoric acid, bis(trimethylsilyl)monomethyl ester	232900000	200264000	94651500	223829000	161697000		232626000	100854000	164019000	204539000	160448000	169526000	227915000	225635000	250573000	184811000	18686499	mainlib	782
unknown 25	431163000	320037000	243111000	347526000	442988000	244465000	239745000	134494000	212140000		158543000	123424000	377295000	223904000	249903000	281005000	43092939	gmd_pred_mosys-ri	740
Uracil (2TMS)	1499440000	1521020000	1266630000	1279180000	2009460000	1809540000	1839130000	1166390000	1769390000	1660600000	1509080000	1725620000	2807810000	2629540000	2639460000	2330470000	324502213	gmd_var_alk_mz_all_2011	883
2-Butenedioic acid, (Z)-, 2TMS derivative	607529000	438712000	728593000	465227000	1364680000	1340380000	653858000	250575000	890178000	965362000	520608000	539418000	2480540000	1368140000	1275520000	1446910000	171817079	mainlib	837
L-Threonine, 3TMS derivative	3601170000	3474390000	3253160000	3112020000	4289170000	4066740000	3810560000	2353590000	5018000000	5435400000	4734410000	5119840000	7620710000	6493940000	6618180000	6422970000	0	mainlib	929
L-Leucine, TMS derivative	963937000	581517000		619235000	143463000		795365000		1736300000	1596770000	2490940000	3124190000	796748000	3936160000	4212380000		0	mainlib	923
Maltose (1MEOX) (8TMS) BP	134809000	132200000	62853800	140639000	170821000	175368000	146972000	73945300	141708000	118129000	124326000	157280000	630506000	572345000	488659000	445306000	0	gmd_pred_mosys-ri	920
Ribose	1312760000	1137520000	630324000	958990000	1017450000	838650000	1320950000	625981000	1602200000	1303930000	1961450000	2050460000	5880280000	5860820000	6382790000	4873620000	0	mainlib	915
Trehalose (8TMS)	5275010000	5381230000			6343040000	6138910000	5690770000	4331120000	6551990000		6352270000	6893670000	8817980000	8221450000	8203220000	8835490000	0	gmd_pred_mosys-ri	915
Phenylalanine, 2TMS derivative	1190720000	1358150000	729105000	951040000	908917000	774019000	1465890000	684322000	2556110000	2251630000	2450560000	2935820000	4481630000	5578010000	5745890000	4975550000	0	mainlib	914
Unknown 1	498414000	532341000	328704000	471414000	723702000	799464000	888117000	435859000	352601000	401859000	381567000	519943000	881534000	1024480000	1012940000	789044000	0	gmd_var_alk_mz_all_2011	911
2-Ketoisocaproic acid (1TMS)	1364020000	1180740000	1062140000	1452600000	1669310000		1333820000	614163000	2093010000	2483080000	1784840000	2048370000	5090860000	2482610000	2772040000	2171730000	0	mainlib	909
Asparagine (3TMS)	1568090000	1168200000			1215750000	1059010000	1530160000		614215000	1487630000	946103000	784950000	1810760000	1973050000	2160910000	1614460000	0	gmd_var_alk_mz_all_2011	903
7-(Trimethylsilyl)-2,6-bis[(trimethylsilyl)oxy]-7H-purine	1538470000	1491240000	913325000	844923000	1597450000		1755890000	765843000	1155500000	1076560000	925890000	1065460000	3003910000	3214650000	3335460000	2677770000	0	mainlib	902
Dihydroxyacetone phosphate (1MEOX) (3TMS)	445754000	406807000	245874000	334970000	397153000	354726000	579538000	328812000	385658000	499990000	484441000	463012000	1572850000	1433510000	1961570000	1533120000	0	gmd_var_alk_mz_all_2011	899
Glucose-6-phosphate, 2-amino-2-deoxy- (6TMS)				35326200	59951500	73208500	84786400	35374600	153802000	168980000	313902000	191620000	1168960000	1441230000	1296700000	615491000	0	gmd_pred_mosys-ri	899
Homoserine (3TMS)	177900000	179744000	111480000	131965000	232638000	283910000	201046000	101362000	477361000	571396000	518995000	532398000	1129520000	1099000000	1082620000	865259000	0	gmd_pred_mosys-ri	898
Uridine 5'-monophosphate (5TMS)	828199000	895148000	430822000	755059000	485257000	1080550000	1299160000	653473000	269883000	801555000	370604000	739843000	459012000	321053000	471567000	287978000	0	gmd_var_alk_mz_all_2011	898
2,2'-Bipyrrolidine	5283280000	2897160000		3591810000	1812000000		6933880000	116901000	10038000000	8309150000	9958300000	11502200000	6438880000	13199100000	11029200000		0	mainlib	894
Pyrrole-2-carboxylic acid (2TMS)	87127900	79945700		64574700	209709000	184010000	126794000	74321800	316333000	381036000	265684000	337412000	653316000	741135000	694448000	626968000	0	gmd_var_alk_mz_all_2011	892
Glycyl-proline (3TMS)	43065200	46541800	35008800	42878000	120526000	108843000	113531000	61385300	114327000	126203000	104293000	276212000	1387570000	1283000000	1372770000	1297860000	0	gmd_var_alk_mz_all_2011	892
Malic acid (3TMS)	1548850000	1336850000	817598000	1187800000	1678180000	1303540000	1705920000	803050000	2338720000	2817150000	2095490000	2359850000	3899170000	3385470000	3859070000	3230420000	0	gmd_pred_mosys-ri	890
Unknown 32	3565320000	3016400000	2216010000	2849100000	3340900000	2617880000	3194480000	1611790000	5068860000	5309980000	4452390000	4213510000	2604110000	2659910000	2721450000	2927090000	0	gmd_pred_mosys-ri	889
Tyrosine (3TMS)	819738000	874735000	532945000	597388000	1188390000	1201910000	1327690000	651884000	2590520000	2519120000	2594260000	2990040000	5579110000	5656430000	6074270000	5660800000	0	gmd_pred_mosys-ri	889
Spermidine (5TMS)	968748000	932852000	886276000	985485000	909706000	911312000	1073490000	482538000	1909870000	1159980000	1308530000	928557000	1120290000	931456000	971535000	854493000	0	gmd_pred_mosys-ri	888
Alanyl-alanine (2TMS)	724042000	740437000	438684000	603517000	503758000	417493000	533827000	263255000	868501000	996791000	737167000	879138000	2149530000	2176050000	2087960000	2021110000	0	gmd_var_alk_mz_all_2011	887
Butanoic acid, 4-amino- (3TMS)	238499000	228365000	167153000	206433000	507879000	444488000	401768000	214443000	665632000	686903000	593132000	843516000	2129540000	1955670000	2023040000	1698400000	0	gmd_var_alk_mz_all_2011	886
Proline [+CO2] (2TMS)	472106000	430035000	801051000	460638000	1361200000	530204000	692589000	320995000	3159730000	2150140000	2697840000	4094810000	3539720000	3890110000	4607410000	3843760000	0	gmd_var_alk_mz_all_2011	886
Pentanoic acid, 2-(methoxyimino)-3-methyl-, trimethylsilyl ester	394528000	118094000		457654000	170574000		330538000	215516000	587574000	1089260000	649609000	767519000	922323000	907431000	1115620000	944901000	0	mainlib	756
Leucine (2TMS)	1057670000	1295720000	3467810000	743428000	3191610000	4669150000	1559000000	1200640000	2087800000	1958090000	1505750000	2033730000	9713960000	4809120000	5057050000	5822480000	0	gmd_pred_mosys-ri	884
Glucose-6-phosphate (1MEOX) (6TMS) BP	787881000	894404000	331456000	916462000	520308000	1010760000	604465000	289042000	683143000	428777000	628226000	948328000	3801760000	4022400000	3891350000	3357920000	0	gmd_var_alk_mz_all_2011	884
3-Methyl-2-oxopentanoic-acid_2_1MeOX_1TMS	178439000	131852000		174716000	208372000		164699000	66156500	310146000	342424000	205224000	231119000	323129000	259013000	302649000	244132000	0	gmd_var_alk_mz_all_2011	881
beta-Alanine, 3TMS derivative	8616870	8379460	4362700	7985260	158268000	105600000	187173000	102282000	63219300	74265100	63074500	356601000	1067300000	1034800000	1048780000	901665000	0	mainlib	881
Glutamine (4TMS)	143333000	200999000		104512000	353868000	551408000	604812000	309269000	1825610000	2185910000	2096620000	1094030000	2000340000	2126680000	2752400000	2430170000	0	gmd_var_alk_mz_all_2011	880
Hexasiloxane, tetradecamethyl-	670790000	732514000	579049000	839151000	889535000	861068000	1295050000	733592000	597067000	1823980000	607328000	1118750000	1607130000	672797000	1587670000	1290870000	0	mainlib	879
Lumichrome (2MEOX)	419637000	362683000	241130000	372746000	444844000	968118000	363900000	191171000	312233000	379683000	279889000	359336000	553771000	556997000	528583000	463270000	0	gmd_var_alk_mz_all_2011	875
Glyceric acid-3-phosphate (4TMS)	77069900	77841800	211076000	179771000	236284000	120349000	187960000	61611900	100679000	224135000	145172000	163525000	438285000	178343000	232151000	314232000	0	gmd_var_alk_mz_all_2011	870
L-Cysteine, 3TMS derivative				158723000	121283000	50811900	172319000	56698300	131434000		140679000	158007000	242603000	332991000	337402000	240528000	0	mainlib	868
L-Methionine, 2TMS derivative	788057000	878190000	760648000	569829000	1116790000	1666050000	1145860000	606980000	1584660000	1444710000	1587250000	1389650000	3465110000	3222760000	3400170000	3483320000	0	mainlib	861
L-Ornithine, 4TMS derivative	3325520000	3443370000	2991420000	2706240000	2753380000	3052400000	3265200000	1915580000	4226490000	4050190000	4315250000	3944430000	5190230000	5370260000	5304120000	4813390000	0	mainlib	858
Thymidine-5'-monophosphoric-acid_3TMS	105036000	97017900	69386700	88585400	84917100	110500000	102965000	57879100	92076900	107103000	90216800	117361000	277057000	230499000	263695000	243251000	0	gmd_var_alk_mz_all_2011	740
Unknown 6	41237100	68004000			31821800		42303200	36474200	107533000	66351500	107296000	140410000	462642000	326401000	393759000	324386000	0	gmd_pred_mosys-ri	856
L-Glutamic acid, bis(trimethylsilyl) ester	608398000	182320000	109244000	289975000			759306000	95907100	1664320000	1905390000	2026840000	1938840000	789720000	3411520000	3564630000	692629000	0	mainlib	853
Ribulose-5-phosphate (1MEOX) (5TMS) BP	305297000	242480000	175397000	245586000	220583000	288976000	321347000	118771000	257728000	179286000	273708000	201641000	581824000	1063000000	670888000	367942000	0	gmd_var_alk_mz_all_2011	850
Glyceryl-glycoside TMS ether	63246600	60580600	38641100	44281600	15481900	33264000	54703300	37877300	60857000	45256100	50838900	60685300	139842000	143462000	135722000	142479000	0	mainlib	850
L-Lysine, 3TMS derivative	335299000	141731000	53793300				272991000		378502000	442324000	468710000	339102000	407978000	869620000	890638000	128650000	0	mainlib	848
Pentanedioic acid, 2-(methoxyimino)-, bis(trimethylsilyl) ester	1438890000	1194560000	578910000	1153700000	2499610000	1144200000	2045170000	858043000	3352930000	3689280000	2254000000	2645550000	2963620000	2349790000	3367070000	2937380000	0	mainlib	846
Proline (1TMS)	5287350000	2898940000		3594010000	1813020000		6941550000	117063000		8319650000	9956760000	11501000000	6445000000	11219000000	11028700000		0	gmd_var_alk_mz_all_2011	840
Nicotinamide (1TMS)	2131360000	2249090000	2061030000	2744490000	2064160000	1661830000	2289860000	1221530000	2010450000	2121990000	1571530000	1728310000	2237530000	2263220000	2351360000	2109980000	0	gmd_var_alk_mz_all_2011	840
Butanoic acid, 4-methylthio-2-oxo- (1MEOX) (1TMS) MP	249398000	219506000	132188000	266080000	403976000	335320000		198364000	704279000	1001680000	569939000	681802000	1114220000	814811000	973774000	709548000	0	gmd_var_alk_mz_all_2011	830
Phosphoric acid, bis(trimethylsilyl) 2,3-bis[(trimethylsilyl)oxy]propyl ester	192740000	407739000	314256000	310063000	139984000	251646000		182219000	129834000	119412000	160486000	178337000	526076000	513764000	582524000	458949000	0	mainlib	824
Phenylpyruvic acid (1MEOX) (1TMS) MP	812002000	816442000	583371000	925157000	624386000	334667000	694317000		832512000	1080670000	822171000	728746000	1209440000		1121780000	1068670000	0	gmd_var_alk_mz_all_2011	823
Etoxeridine	4517650000		3742940000			8263800000		4373550000	8538400000	8732300000	8229920000	8474600000	1830210000	1704230000	1863630000	945846000	0	mainlib	822
Phosphoric acid (3TMS)	8973880000	9040080000	8858060000	9259420000	8709360000			7415440000	7986530000	9375650000	8578090000	9922600000	10813500000	14864600000	14005900000	12162000000	0	gmd_pred_mosys-ri	820
Hexanedioic acid, bis(2-ethylhexyl) ester	1484130000	1540200000	1443330000	1506100000	1624220000				1560320000	1557570000	1422730000	1406580000	1525850000	1452190000	1521390000	1494760000	0	mainlib	820
Uridine (4TMS)	2359670000	2394400000	1636840000	2042670000	2802880000	3028490000	3107980000	1494440000	2893020000	3109480000	3053230000	3065460000	5916020000	5748030000	6052430000	5253430000	0	gmd_pred_mosys-ri	820
Carbodiimide (2TMS)	17329500	14606000	25103000	13607100	29473400	30531300	17764100	10589700	16643700	26576200		15779000	36569700	44699600	30437300	32205600	0	gmd_pred_mosys-ri	818
Cadaverine, 4TMS derivative	5071340000	4759670000	3871510000	5341870000	7543480000	6991830000	6451440000	4341620000	4458710000	5934800000	3322970000	4810360000	7336740000	6056460000	6813780000	6375420000	0	mainlib	817
N-Acetyl-D-galactosamine, (isomer 2), 4TMS derivative	32839600	29048000	26183500	27589200	89518800		67363900		67055600	37191100	5929330	37846300	367176000	348728000	303277000	289705000	0	mainlib	817
L-Isoleucine, 2TMS derivative	368044000	557566000	477893000	325302000	979098000	919917000	801222000	698830000	1822550000	2193050000			3492920000	4696760000	4912110000	4779120000	0	mainlib	804
Ornithine-1,5-lactam (2TMS)	55164600	53804100	46123700		44924900	44193500		35754000	38917200	39414100	62091400	29512300	66720200	63291400	71365400	63382000	0	gmd_var_alk_mz_all_2011	804
Adenosine (3TMS)	293386000	353969000	198382000	291595000	217126000	314097000	280418000		444469000	517826000	544644000	1170540000	1568590000		1508970000	3151680000	0	gmd_var_alk_mz_all_2011	797
Valine, N-methyl-N-methoxycarbonyl-, octyl ester	21705100	23678100	20278800	19604300	27068100	25778500	28595200	14907700	38504900	47583500	38627000	41146200	89761100	98548000	111802000	74592300	0	mainlib	795
Putrescine (4TMS)	4923020000	4395230000	3335370000	4974010000	6713570000	5913910000	5515360000	3193510000	5428730000	6584050000	4147810000	4870230000	6196670000	4831380000	5470220000	5263530000	0	gmd_pred_mosys-ri	793
Disiloxane, hexamethyl-	33636200	32723400	23962800			20107800	44986600	17033400	56261400		61474900	49443200	267140000	226547000	297083000	134834000	0	mainlib	788
Homocysteine (3TMS)	76238100	65341100	46221100	73147000	61782200	66255300	50695400		78120400	76931500	53307000	60424700	143473000	166174000	164597000	171734000	0	gmd_var_alk_mz_all_2011	787
Benzenepropanoic acid, ?-(methoxyimino)-4-[(trimethylsilyl)oxy]-, trimethylsilyl ester	744446000	716093000	454601000	802494000	759776000	504473000	671627000	301230000	1068630000	1473980000	783036000	944659000	1913450000	1575270000	1657090000	1424080000	0	mainlib	781
Succinic semialdehyde (1MEOX) (1TMS) BP	49401200	153649000		41370800			51263700	96332000	105862000	36620400	28516600	43553300	58242100	51811700	83895600		0	gmd_var_alk_mz_all_2011	779
Unknown 14	474980000	480097000	394594000	436742000	377831000	402514000	307554000	245453000	160576000	159311000	185760000	218955000			469422000	404625000	0	gmd_pred_mosys-ri	773
5'-Methylthioadenosine, 3TMS derivative	1018460000	1012120000	798433000	968309000	1093450000	1237300000	1012860000	630420000	881154000	925457000	707580000	695895000	1476450000	1263510000	1301820000	739347000	0	mainlib	773
Glycine (3TMS)	2209670000	4089700000	1904680000	1688320000	1759090000	1601920000	1831890000	1050470000	2360340000	2353210000	2116020000	2386890000	3673610000	3150310000	3138290000	5815710000	0	gmd_pred_mosys-ri	770
Cycloheptasiloxane, tetradecamethyl-	13215700	16696200	18319700	18990000	26593900		40115500	20418800	12283200	62948400	14266100	33802200	44412000	12245500	47089400	39929300	0	mainlib	769
Hypoxanthine (2TMS)	161327000	118271000	63786200		146843000	116151000		77381500	274972000	221268000	160430000			292809000	311975000	312945000	0	gmd_var_alk_mz_all_2011	767
Sucrose, 8TMS derivative	5237880000	5342620000			6294070000	6093390000	5649810000	4301080000	6519590000		6311350000	1597330000	2048650000	8145590000	2056490000	2213590000	0	mainlib	766
Pipecolic acid, N-ethoxycarbonyl-, dodecyl ester	54702600	55895000	40464900	41358300	77730400	71769100	52553400		63730200	83562000	36435600	33276900	126643000	110339000	92412800	113289000	0	mainlib	765
Allantoin (4TMS)	233436000	228647000	171694000	228403000	260246000	259125000	258035000	107038000	279040000	326559000	197653000	199921000	523937000	379712000	422913000	418173000	0	gmd_pred_mosys-ri	762
Indole-3-lactic acid, 3TMS derivative	231561000	240461000	139218000	233509000	442791000	268365000	320238000	140096000	298831000	369412000	210984000	253848000	559810000	430293000	493165000	517771000	0	mainlib	757
l-Leucine, N-methyl-N-(2-methoxyethoxycarbonyl)-, dodecyl ester		41480600	43237600	29795800	46463500	44196000	40098700	24969000	89555600	78220400	59702700	107450000	174823000	163793000	137794000	168755000	0	mainlib	755
Indole-3-pyruvic acid (1MEOX) (2TMS) MP		600855000	461101000	643055000	630291000	402477000	350196000	238504000	254539000	400041000	207839000	280698000	593671000	253571000	391635000	371685000	0	gmd_var_alk_mz_all_2011	751
Phosphoric acid, 3-(methoxyimino)-2-[(trimethylsilyl)oxy]propyl bis(trimethylsilyl) ester	49540400	50928900	36525300	44837900			63574400	29065400	59877100	19689400	19178000		83193200		93269200	76900700	0	mainlib	744
Silane, diethylbutoxypentyloxy-	21315800	21225400	13613500		25144200	19592000	22502400		30459100	24897100	23692200	28835500	164171000	141202000	135480000		0	mainlib	741
DL-Alanine, N-methyl-N-(byt-3-en-1-yloxycarbonyl)-, byt-3-en-1-yl ester	80075800	32838200		60160700	89598200		88150100		83124200	63259400	51722200	39090900	85100800	47598900	57187200	55248100	0	mainlib	740
{4-Methoxy-2-[(trimethylsilyl)oxy]phenyl}{2-[(trimethylsilyl)oxy]phenyl}methanone	16193700	16525300		16940400			19127100	8304190	11977100	20219500	20092600	22729000	26628500	55276800	47852500	27209300	0	mainlib	738
Glutamine, DL- (3TMS)	721688000		333330000	557884000	1973240000	2187080000	2029060000	1285390000	4061610000	4276160000	3829100000	3270940000	3827130000	4469200000	4702170000	3765520000	0	gmd_pred_mosys-ri	736
Glucose-6-phosphate (1MEOX) (6TMS) MP	3236410000	3431840000	2229850000	3540990000	2864520000	3632360000	3230290000	1919760000	3075110000	2750400000	3585370000	4135740000	9360880000	9935260000	6299210000	5685150000	0	gmd_pred_mosys-ri	734
unknown 28	52420400	52512800	58760300	54398000	22454500	29474800	31480800	16010900	77015200	50745500	63408200	101305000	160719000	149723000	131448000	148707000	0	gmd_pred_mosys-ri	724
Monomethyl succinate, trimethylsilyl ester	256014000	224169000		235979000	382264000		277571000	162633000		370640000	226764000	236366000	656916000		423495000	509193000	0	mainlib	721
Bernzothiazole, 2-[2-(2-fluorophenoxy)ethylthio]-	174345000	170164000	160470000	170338000	195887000	17271600	14117700		186629000	194431000	172972000	163780000	209044000	202741000	215332000	194896000	0	mainlib	720
D-Mannose, 2,3,4,5-tetrakis-O-(trimethylsilyl)-, O-methyloxime, 6-[bis(trimethylsilyl) phosphate]	3233210000	3428430000	2227680000	3537420000	2861620000	3628770000	3227090000	1917900000	3072080000	2747700000	3581740000	4131500000	9349220000	9922950000	9474180000	5678170000	0	mainlib	720
unknown 29	37196200	34845100		31150300	96402000	133722000	61175800	35016100	161340000	192097000	120768000	217818000		952419000	816919000	743859000	0	gmd_pred_mosys-ri	719
Ornithine, N2-acetyl- (3TMS)	222910000	206993000	148729000	249575000	338533000	293638000	314946000	188968000	287746000	337779000	213413000	297021000	746968000	517149000	587513000	618819000	0	gmd_pred_mosys-ri	716
Cyclodecasiloxane, eicosamethyl-	93262100	138179000	187341000	135349000	307394000	244747000	153663000	95449900		331678000	139287000	327703000	464865000	63621200	466491000		0	mainlib	708
PGP	288711038	343058789	238790628	341452137	364695348	286423106	349518832	315290062	277588399	354792925	280522205	365792873	286266850	335848003	325843771	364393924	323008357	internal std

## Sheet: Trimmed List
	Better Name	3h V1	3h V2	3h V3	3h V4	6h V1	6h V2	6h V3	6h V4	3h C1	3h C2	3h C3	3h C4	6h C1	6h C2	6h C3	6h C4	Medium	Blank Percentage	Library	Similarity
*2-Ethylhexanal ethylene glycol acetal	2-Ethylhexanal ethylene glycol acetal	2065949294	3127104561	3364562269	2094212669	6591533834	9205552934	4993880615	4889900202	6195081305	6575451861	5596187701	5121177774	9977499074	9757836565	10299805670	10190956404	10838428	0.00173334	mainlib	812
Valine (2TMS)_M000030_A122001-101-xxx_NA_1207,1_TRUE_1227,10_MOSYS_TRUE_VAR5_ALK	Valine (2TMS)	2414574987	2808840264	2997170324	2055024698	5579565012		4125703952	3207167857	4810807477	4330828557	3679583787	5667670007	12835546576	7114984607	7654125987	9643831510	10849298	0.00206194	gmd_pred_mosys-ri	917
L-Lysine, 4TMS derivative	L-Lysine, 4TMS derivative	4102607606	4285759991	3629082723	3111110525	3925198690	4181602154	4310920638	2692870579	4938107762	4840965969	5036116292	4810209020	6545961540	6874716421	6685626078	6246805227	11364876	0.00238577	mainlib	839
L-Proline, 2TMS derivative	L-Proline, 2TMS derivative	3940811306	5425078419	7111640193	3787636110	13466608687		8660277131	8231325132	10442463920	11130235837	9463543944	8684580016	24559711003	17087391329	17534702429	18059861975	29677457	0.00265632	mainlib	896
*Adenosine, 4TMS derivative	Adenosine, 4TMS derivative	6038876092	5985980283	4535048013	4950372852	6659148709	6194714323	6328953622	3948751752	6958635482	6857253164	6292538840	7164767718	12138906968	11031059517	11635610368	11233405768	21481151	0.00291383	mainlib	875
L-Glutamic acid, 3TMS derivative	L-Glutamic acid, 3TMS derivative	4519148827	4552311982	3744111927	3961176199	7606279680	8266565205	6642247347	4375131114	8541749084	8735899095	8233076889	8477965592	5475569178	3131897874	2891867068		45211647	0.00760669	mainlib	897
*Unknown#sst-cgl-008_M000000_A124007-101-x1[NA]_NA_1238,44_PRED_VAR5_ALK	Unknown 4	12640487276	4068543789	13596657098	13654363279	11580131357	14788085642	11084397786	8915328999	6694098754	8158269034	7130224782	7659153829	273599805	6915648604	6715346248	6789749007	67024110	0.00762374	gmd_var_alk_mz_all_2011	876
*Pyrophosphate (4TMS)	Pyrophosphate (4TMS)	1568091822	1168197194	664632061	1361506025	1215747925	1059007940	1530160040	559443212	614214622		946103154	784950422	1810758219	1973050586	2160911548	1614456420	12020287	0.00947413	gmd_pred_mosys-ri	894
*Adenosine-5-monophosphate (4TMS)	Adenosine-5-monophosphate (4TMS)	673105388	1151783086	688611944	1186210868	1320926352	2477353426	2266156597	384123688	1015232450	1582034195	1485182461	1547806662	3514767150	1111150220	3922543154	2411030286	21962860	0.0131426	gmd_var_alk_mz_all_2011	912
Citric acid, 4TMS derivative	Citric acid, 4TMS derivative	6348258639	6080184239	4809211502	6079408786	4134365233	4124867178	4688403920	2867231472	2031329878	2150519632	1365974216	1508524166	2336032100	1679774811	1883012463	2046555026	63478207	0.0187619	mainlib	768
*Butanedioic acid, 2TMS derivative	Butanedioic acid, 2TMS derivative	5870009833	5928466642	4405846835	5146858722	7263682266	7092250270	6570296219	4362759188		6976790430	6527432626	7369631410	11520102108	10203289193	10326772759	9882822698	152182012	0.0208569	mainlib	839
*Ethanol, 2-butoxy-, phosphate (3:1)	Ethanol, 2-butoxy-, phosphate (3:1)	573998200	739124593	612128753	650552090	776368892	70179378	65991003		902486045	941984583	842481233	917580693	874674454	1052368784	1013379593	849580103	29248607	0.0403137	mainlib	875
*Methylal	Methylal	525016391	74294346	352876017	485992059	676190211		591414049	237142274	915859377	776348660	771445125	752558021	1310228071	1459111943	1432161266	3049065408	48150325	0.0538606	mainlib	753
*Fumaric acid (2TMS)	Fumaric acid (2TMS)	1054370859	953543629	792058442	930704949	1534478432	1181701854	1099836435	511570760	1970665953	2220039680	1491281281	1496250720	3034622716	2916279334	2853099449	3264715222	94353004	0.0552879	mainlib	905
Benzenemethanol, 2-chloro-α-[[(1-methylethyl)amino]methyl]-	Benzenemethanol, 2-chloro-α-[[(1-methylethyl)amino]methyl]-		117503592		83952107	71856173		66240156		307924565	501229992	113467615	113815370	123513586	329940530	973433628	189772573	14701379	0.0589499	mainlib	744
D278931_M000000_A278013-101-xxx_NA_2788,69_TRUE_2876,10_MOSYS_PRED_VAR5_ALK	Unknown 17	575540417	650394252	550812722	621307832	721757593	63267989	70738507	112286601	758888954	922870910	1020784478	1083065829	781770707	914318502	774740441	291049974	40106346	0.0647294	gmd_pred_mosys-ri	766
D260482_M000000_A260006-101-xxx_NA_2604,01_TRUE_2682,22_MOSYS_PRED_VAR5_ALK	Unknown 13	531083400	551330609	520457684	541454014	610294039	53477911	42337057	20379176	568701966	577312129	547388109	524952566	644142025	604647602	641678078	621879211	31366699	0.066022	gmd_pred_mosys-ri	792
Benzothiazole, 2-(2-hydroxyethylthio)-	Benzothiazole, 2-(2-hydroxyethylthio)-	2505898644	2505042298	2351868974	2490168644	2699869736	291690404	263624159	113669608	2680438737	2766458380	2370305869	2306981732	2623759767	2564785333	2746684376	2490726430	187151071	0.0886657	mainlib	741
*Butylated Hydroxytoluene, TMS derivative	Butylated Hydroxytoluene, TMS derivative	1575431731	1485862824	1292685318	1452989955	1629542366	142829106	110435482	74886052	1844288497	2033463412		1609382058	1970869822	1991971911	2202478222	1773212306	126660177	0.089659	mainlib	858
*Adenine (2TMS)	Adenine (2TMS)	2095737499	2070149589	1647987760	1758680363	1958695313	1801719466	1981067385	1146233638	2140205804	2139369183	1495340111	1895976525	3234195859	2916110070	2988609204	2924906304	198343755	0.092806	mainlib	914
Phosphoric acid, bis(trimethylsilyl)monomethyl ester	Phosphoric acid, bis(trimethylsilyl)monomethyl ester	232899959	200264400	94651496	223828747	161697319		232626495	100853979	164019295	204539368	160448114	169526125	227914912	225635088	250573237	184810901	18686499	0.0988952	mainlib	782
Sarcosine ethyl ester hydrochloride	Sarcosine ethyl ester hydrochloride										835247				2639379	5796949		331416	0.107236	mainlib	755
NA_M000000_A145008-101-xxx_NA_1447,39_PRED_1467,98_MOSYS_PRED_VAR5_ALK	Unknown 25	431163115	320036730	243111101	347526429	442988149	244465096	239745122	134494342	212139871		158542802	123424433	377295410	223904094	249902618	281005251	43092939	0.160406	gmd_pred_mosys-ri	740
*Benzenamine, N-ethyl-	Benzenamine, N-ethyl-	252673415	228313673		242125119			40319045		250367902	268414541	246442802	227155973		249225709	260903699		38351902	0.169254	mainlib	880
*Uracil (2TMS)_M000456_A136001-101-x1[NA]_NA_1335,93_TRUE_VAR5_ALK	Uracil (2TMS)	1499440085	1521024215	1266630196	1279175141	2009458595	1809540573	1839130806	1166392925	1769387214	1660598326	1509084740	1725617113	2807808356	2629539377	2639455859	2330467255	324502213	0.176224	gmd_var_alk_mz_all_2011	883
2-Butenedioic acid, (Z)-, 2TMS derivative	2-Butenedioic acid, (Z)-, 2TMS derivative	607528968	438711996	728592846	465227056	1364675852	1340384068	653858086	250574831	890178158	965362333	520608141	539418101	2480544137	1368138554	1275520207	1446912047	171817079	0.179253	mainlib	837
Benzyl alcohol, TMS derivative	Benzyl alcohol, TMS derivative		77886757		68113461			99740771	44847899	63888009	187437491		168887115	234244670	78527869	210529409	135528397	23755537	0.190789	mainlib	758
L-Threonine, 3TMS derivative	L-Threonine, 3TMS derivative	3601170908	3474391806	3253156857	3112019894	4289167890	4066736185	3810556907	2353587113	5018005215	5435403889	4734412489	5119835774	7620713225	6493936158	6618181273	6422974845			mainlib	929
L-Leucine, TMS derivative	L-Leucine, TMS derivative	963936987	581516895		619234828	143462987		795365042		1736296036	1596774599	2490940510	3124194134	796748348	3936158473	4212380647				mainlib	923
Maltose (1MEOX) (8TMS) BP_M000048_A277002-101-xxx_NA_2745,49_TRUE_2845,00_MOSYS_TRUE_VAR5_ALK	Maltose (1MEOX) (8TMS) BP	134808909	132200338	62853805	140638917	170821341	175368427	146972080	73945334	141708444	118129035	124325945	157280467	630505707	572345003	488658657	445305797			gmd_pred_mosys-ri	920
*Ribose	Ribose	1312764066	1137515990	630324348	958989692	1017446604	838649680	1320946412	625981097	1602195892	1303930758	1961452928	2050462018	5880278316	5860820751	6382787988	4873615297			mainlib	915
*Trehalose (8TMS)	Trehalose (8TMS)	5275008290	5381225535			6343038190	6138912998	5690769728	4331124186	6551987347		6352269184	6893668065	8817980895	8221447551	8203217141	8835489606			gmd_pred_mosys-ri	915
Phenylalanine, 2TMS derivative	Phenylalanine, 2TMS derivative	1190724542	1358149899	729105265	951040287	908917333	774019370	1465886040	684321930	2556109515	2251630136	2450563660	2935815501	4481632436	5578006390	5745888914	4975552229			mainlib	914
*2-Deoxyadenosine (3TMS)	2-Deoxyadenosine (3TMS)									58102747	37702286	51317466	80706506	222708938	188150018	209004872	218802416			mainlib	913
*NA_M000000_A352002-101-x1[NA]_NA_3516,3_PRED_VAR5_ALK	Unknown 1	498414309	532341337	328703963	471413506	723701997	799464119	888117266	435858986	352600649	401859032	381566572	519942532	881534085	1024477843	1012941892	789043663			gmd_var_alk_mz_all_2011	911
*2-Ketoisocaproic acid (1TMS)	2-Ketoisocaproic acid (1TMS)	1364015781	1180739498	1062140671	1452604214	1669314548		1333816494	614163297	2093007014	2483081849	1784843617	2048371112	5090860827	2482612507	2772039785	2171731881			mainlib	909
Galactinol (9TMS)_M000673_A299002-101-xxx_NA_2966,29_TRUE_3070,40_MOSYS_TRUE_VAR5_ALK	Galactinol (9TMS)											51478410		47952475	55497226	68642149	36739900			gmd_pred_mosys-ri	907
*Maltotriose (11TMS)	Maltotriose (11TMS)					50879457	51413034	65347305					53291792	145763545	160482362	157817373	102739761			gmd_pred_mosys-ri	905
Asparagine (3TMS)_M000013_A168001-101-x1[DL-]_NA_1666,44_TRUE_VAR5_ALK	Asparagine (3TMS)	1568091822	1168197194			1215747925	1059007940	1530160040		614214622	1487632263	946103154	784950422	1810758219	1973050586	2160911548	1614456420			gmd_var_alk_mz_all_2011	903
L-Alanine, 2TMS derivative	L-Alanine, 2TMS derivative	6460453721	5645651580		3720931013			7564831375		7095544513	6544036468	5467996416	7220739961		9254013075	9512801587				mainlib	902
*7-(Trimethylsilyl)-2,6-bis[(trimethylsilyl)oxy]-7H-purine	7-(Trimethylsilyl)-2,6-bis[(trimethylsilyl)oxy]-7H-purine	1538474156	1491244960	913325376	844923439	1597450916		1755887459	765842758	1155502265	1076562372	925889630	1065457762	3003908174	3214648707	3335455147	2677772349			mainlib	902
*Isovaleric acid, 2-oxo- (1MEOX) (1TMS) MP_M000449_A116004-101-x1[NA]_NA_1095,76_TRUE_VAR5_ALK	Isovaleric acid, 2-oxo- (1MEOX) (1TMS) MP	643081275	465357967		462666082			589050169		869688476	1057911597	644437874	791424682		748564703	1136972643				gmd_var_alk_mz_all_2011	900
*Dihydroxyacetone phosphate (1MEOX) (3TMS)	Dihydroxyacetone phosphate (1MEOX) (3TMS)	445753992	406806937	245874165	334970001	397153230	354725539	579537938	328812445	385657736	499989988	484441115	463011593	1572853770	1433512376	1961567341	1533116378			gmd_var_alk_mz_all_2011	899
*Glucose-6-phosphate, 2-amino-2-deoxy- (6TMS)	Glucose-6-phosphate, 2-amino-2-deoxy- (6TMS)				35326180	59951501	73208481	84786406	35374626	153801836	168979573	313901906	191619771	1168959241	1441231934	1296701535	615491486			gmd_pred_mosys-ri	899
*Homoserine (3TMS)	Homoserine (3TMS)	177899904	179744442	111480442	131965000	232637650	283910324	201046038	101362024	477361210	571396431	518995265	532398458	1129516773	1098995237	1082617859	865258951			gmd_pred_mosys-ri	898
*Uridine 5'-monophosphate (5TMS)	Uridine 5'-monophosphate (5TMS)	828198614	895148250	430821529	755058810	485257469	1080549152	1299155769	653473329	269882849	801555341	370603699	739843127	459012395	321053309	471567187	287978358			gmd_var_alk_mz_all_2011	898
*Butanoic acid, 2-amino- (1TMS)	Butanoic acid, 2-amino- (1TMS)									164937966	222940681	233514568	154140761		240410176	246759976				gmd_var_alk_mz_all_2011	896
*2,2'-Bipyrrolidine	2,2'-Bipyrrolidine	5283278629	2897155446		3591809613	1811999329		6933883706	116900879	10038039312	8309148955	9958301071	11502243536	6438876112	13199098589	11029245493				mainlib	894
*Pyrrole-2-carboxylic acid (2TMS)	Pyrrole-2-carboxylic acid (2TMS)	87127937	79945690		64574655	209709279	184009813	126794327	74321838	316333414	381036054	265683979	337411841	653316063	741135157	694448097	626967923			gmd_var_alk_mz_all_2011	892
*Glycyl-proline (3TMS)	Glycyl-proline (3TMS)	43065230	46541793	35008805	42877967	120525963	108842859	113530627	61385349	114326799	126203387	104292540	276212018	1387574100	1283000914	1372770171	1297857304			gmd_var_alk_mz_all_2011	892
Malic acid (3TMS)_M000065_A149001-101-xxx_NA_1478,99_TRUE_1503,50_MOSYS_TRUE_VAR5_ALK	Malic acid (3TMS)	1548850864	1336845937	817598463	1187800066	1678176546	1303540265	1705917125	803050293	2338724977	2817151779	2095485492	2359851582	3899168730	3385473460	3859070432	3230416139			gmd_pred_mosys-ri	890
*NA_M000000_A184003-101-xxx_NA_1820,79_PRED_1859,98_MOSYS_PRED_VAR5_ALK	Unknown 32	3565318685	3016395808	2216008273	2849097201	3340899780	2617876301	3194484757	1611789436	5068861428	5309980464	4452386810	4213507218	2604107342	2659913208	2721446882	2927087692			gmd_pred_mosys-ri	889
Tyrosine (3TMS)_M000035_A194002-101-xxx_NA_1934,12_TRUE_1954,60_MOSYS_TRUE_VAR5_ALK	Tyrosine (3TMS)	819738183	874734977	532945086	597388206	1188386231	1201909353	1327685561	651884414	2590522230	2519117770	2594259098	2990039644	5579111341	5656432130	6074272984	5660799981			gmd_pred_mosys-ri	889
Spermidine (5TMS)_M000106_A226002-101-xxx_NA_2251,32_TRUE_2284,00_MOSYS_TRUE_VAR5_ALK	Spermidine (5TMS)	968748223	932852045	886275608	985485129	909705731	911311916	1073490103	482538377	1909873945	1159975151	1308530846	928557290	1120293477	931455945	971534646	854492699			gmd_pred_mosys-ri	888
*Alanyl-alanine (2TMS)	Alanyl-alanine (2TMS)	724042259	740436742	438683767	603517401	503757702	417492864	533827497	263255123	868500843	996790810	737166900	879137811	2149533690	2176050702	2087955260	2021108338			gmd_var_alk_mz_all_2011	887
*Butanoic acid, 4-amino- (3TMS)	Butanoic acid, 4-amino- (3TMS)	238499122	228365144	167152968	206433272	507879286	444487869	401768007	214443027	665632375	686902707	593131981	843516352	2129536524	1955669425	2023043164	1698399180			gmd_var_alk_mz_all_2011	886
Proline [+CO2] (2TMS)_M000029_A159001-101-x1[NA]_NA_1583,16_TRUE_VAR5_ALK	Proline [+CO2] (2TMS)	472105695	430035017	801051340	460638015	1361200219	530203747	692589443	320995475	3159725158	2150143465	2697840941	4094808470	3539718432	3890111914	4607414472	3843756605			gmd_var_alk_mz_all_2011	886
L-Valine, TMS derivative	L-Valine, TMS derivative	1700963228	921824798		1255848185			1842693334		4985451510	5897864411	5801012730	5836094217		9848878178	9998783790				mainlib	885
*Pentanoic acid, 2-(methoxyimino)-3-methyl-, trimethylsilyl ester	Pentanoic acid, 2-(methoxyimino)-3-methyl-, trimethylsilyl ester	394528026	118093998		457654034	170574397		330538327	215515707	587574012	1089264430	649608882	767518979	922323447	907430757	1115624444	944900780			mainlib	756
Leucine (2TMS)_M000025_A129002-101-xxx_NA_1264,43_TRUE_1282,60_MOSYS_TRUE_VAR5_ALK	Leucine (2TMS)	1057666592	1295719939	3467807162	743427986	3191610344	4669146982	1559001109	1200636752	2087804122	1958091339	1505751695	2033734011	9713962860	4809123976	5057046002	5822483027			gmd_pred_mosys-ri	884
*Glucose-6-phosphate (1MEOX) (6TMS) BP_M000513_A235002-101-x1[NA]_NA_2328,97_TRUE_VAR5_ALK	Glucose-6-phosphate (1MEOX) (6TMS) BP	787881397	894403605	331455737	916462031	520308424	1010764412	604465256	289042322	683142652	428776636	628226524	948328426	3801757125	4022402798	3891347391	3357918829			gmd_var_alk_mz_all_2011	884
*Unknown#bth-pae-001_M000000_A097001-101-x1[NA]_NA_959,45_PRED_VAR5_ALK	Unknown 3	1411293679			649554921	789493926				1354235948	2987823217	1837514678	1892102796		2148965856	2423545954				gmd_var_alk_mz_all_2011	882
*3-Methyl-2-oxopentanoic-acid_2_1MeOX_1TMS_M000000_A119010-101-x1[NA]_NA_1189,12_PRED_VAR5_ALK	3-Methyl-2-oxopentanoic-acid_2_1MeOX_1TMS	178439288	131851574		174715929	208372285		164699322	66156493	310146045	342424018	205223614	231119163	323129276	259013025	302649160	244131892			gmd_var_alk_mz_all_2011	881
β-Alanine, 3TMS derivative	beta-Alanine, 3TMS derivative	8616867	8379464	4362696	7985263	158267692	105599881	187173347	102281816	63219340	74265115	63074460	356600805	1067298750	1034803861	1048775443	901664869			mainlib	881
Glutamine (4TMS)_M000032_A174008-101-x1[NA]_NA_1720,58_TRUE_VAR5_ALK	Glutamine (4TMS)	143332807	200999001		104511750	353867975	551408040	604811522	309268908	1825611067	2185906536	2096622914	1094025572	2000336034	2126682953	2752398081	2430173027			gmd_var_alk_mz_all_2011	880
*Maltotriose (1MEOX) (11TMS) MP_M000269_A355003-101-xxx_NA_3507,56_TRUE_3630,78_MOSYS_PRED_VAR5_ALK	Maltotriose (1MEOX) (11TMS) MP															25129130				gmd_pred_mosys-ri	880
*Hexasiloxane, tetradecamethyl-	Hexasiloxane, tetradecamethyl-	670789552	732514414	579048861	839151120	889534734	861068304	1295047791	733591632	597066957	1823983918	607328270	1118747555	1607126304	672796596	1587674041	1290874249			mainlib	879
Glutamine [-H2O] (3TMS) MP_M000032_A160005-101-x1[NA]_NA_1580,83_TRUE_VAR5_ALK	Glutamine [-H2O] (3TMS) MP						45416688			228196285	141980342	482565454	236396833	182485959	274747948	444522828	253704440			gmd_var_alk_mz_all_2011	879
*Lumichrome (2MEOX)_M000872_A133011-101-x1[NA]_NA_1332,56_TRUE_VAR5_ALK	Lumichrome (2MEOX)	419636573	362683468	241129971	372745656	444843626	968117604	363899874	191171492	312233051	379682887	279888890	359336289	553770530	556996972	528583432	463269571			gmd_var_alk_mz_all_2011	875
Pyruvic acid (1MEOX) (1TMS)_M000071_A104002-101-xxx_NA_1037,28_TRUE_1065,40_MOSYS_TRUE_VAR5_ALK	Pyruvic acid (1MEOX) (1TMS)	767345453	690809978		1021919298			870717387		725079840	873733807	625469647	717444027		470427330	812772616				gmd_pred_mosys-ri	872
*Glyceric acid-3-phosphate (4TMS)_M000105_A181003-101-x1[NA]_NA_1791,68_TRUE_VAR5_ALK	Glyceric acid-3-phosphate (4TMS)	77069890	77841770	211076327	179770660	236284118	120348999	187960328	61611879	100678696	224135126	145171782	163525227	438285114	178343051	232151389	314231841			gmd_var_alk_mz_all_2011	870
*L-Cysteine, 3TMS derivative	L-Cysteine, 3TMS derivative				158723049	121283420	50811940	172318774	56698286	131434422		140679004	158006537	242603114	332990861	337402508	240527673			mainlib	868
*d-Proline, n-propoxycarbonyl-, hexadecyl ester	d-Proline, n-propoxycarbonyl-, hexadecyl ester														18371455	17898791				mainlib	867
*NA_M000000_A148003-101-xxx_NA_1464,64_PRED_1486,09_MOSYS_PRED_VAR5_ALK	Unknown 5		528887276	590499444	540317668	584620479				923681948	1754449061	527263167	1417819731	1367955201		2121577838	1325351321			gmd_pred_mosys-ri	863
*L-Methionine, 2TMS derivative	L-Methionine, 2TMS derivative	788057178	878190346	760648155	569829233	1116790164	1666045605	1145859518	606979513	1584656891	1444713009	1587254482	1389651876	3465114856	3222757078	3400170631	3483325001			mainlib	861
*Tryptophan, 3TMS derivative	Tryptophan, 3TMS derivative		355721721	244528376			488967580	505605928	297343473		780959643	831186352		2519408708	2650141006	2619395267	2383277650			mainlib	861
*L-Ornithine, 4TMS derivative	L-Ornithine, 4TMS derivative	3325516816	3443366672	2991422751	2706239065	2753381584	3052397126	3265202257	1915580634	4226489591	4050192499	4315246231	3944434991	5190228726	5370261204	5304117740	4813391511			mainlib	858
*Thymidine-5'-monophosphoric-acid_3TMS_M000000_A282014-101-x1[NA]_NA_2816,53_PRED_VAR5_ALK	Thymidine-5'-monophosphoric-acid_3TMS	105035774	97017869	69386654	88585447	84917082	110500037	102964503	57879148	92076882	107103130	90216816	117361318	277056579	230498836	263694776	243250946			gmd_var_alk_mz_all_2011	740
Methionine (1TMS)_M000018_A142007-101-x1[L-]_NA_1416,46_TRUE_VAR5_ALK	Methionine (1TMS)	19116712								52553523	55421991	97430271	71483588		227253577	262160056				gmd_var_alk_mz_all_2011	856
*D155405_M000000_A155014-101-xxx_NA_1554,13_TRUE_1580,04_MOSYS_PRED_VAR5_ALK	Unknown 6	41237133	68004042			31821779		42303186	36474238	107533313	66351499	107295695	140409995	462642168	326400954	393759054	324386363			gmd_pred_mosys-ri	856
*Mannose (1MEOX) (5TMS) MP_M000633_A188002-101-xxx_NA_1868,46_TRUE_1910,03_MOSYS_PRED_VAR5_ALK	Mannose (1MEOX) (5TMS) MP	253031282			267181217							233925709		1016427239	1035358595	824332444	675051203			gmd_pred_mosys-ri	855
L-Glutamic acid, bis(trimethylsilyl) ester	L-Glutamic acid, bis(trimethylsilyl) ester	608397938	182320425	109244489	289975393			759305630	95907116	1664320893	1905391183	2026841384	1938839888	789720094	3411522179	3564625872	692629307			mainlib	853
*1,3-Dihydroxyaceton (1MEOX) (2TMS) MP_M000438_A124003-101-xxx_NA_1242,06_TRUE_1252,42_MOSYS_PRED_VAR5_ALK	1,3-Dihydroxyaceton (1MEOX) (2TMS) MP															123266936				gmd_pred_mosys-ri	852
*2-(Methylmercapto)benzothiazole	2-(Methylmercapto)benzothiazole	81172882	76677357	51691757	54272602	117876951					89640321	129836800	197188360	334341428	351727128	368030053				mainlib	850
*Ribulose-5-phosphate (1MEOX) (5TMS) BP_M000769_A211015-101-x1[NA]_NA_2087,72_TRUE_VAR5_ALK	Ribulose-5-phosphate (1MEOX) (5TMS) BP	305297292	242479940	175397164	245586389	220583465	288976416	321346592	118771399	257727868	179285721	273708306	201640932	581824120	1063003091	670888449	367941512			gmd_var_alk_mz_all_2011	850
*Glyceryl-glycoside TMS ether	Glyceryl-glycoside TMS ether	63246616	60580553	38641052	44281639	15481926	33264049	54703337	37877328	60856981	45256117	50838857	60685322	139841673	143462230	135721756	142478922			mainlib	850
*1-(2-(3-Cyclohexenyl)ethyl)silatrane	1-(2-(3-Cyclohexenyl)ethyl)silatrane	16983209	17441650	13252667	15862759	21549574				24159936	25887266	16609101				6554694				mainlib	808
L-Lysine, 3TMS derivative	L-Lysine, 3TMS derivative	335298738	141730763	53793252				272990910		378501726	442324343	468710231	339101556	407978039	869620202	890637746	128650454			mainlib	848
*Isovaleric acid, 2-oxo- (1MEOX) (1TMS) BP_M000449_A121003-101-x1[NA]_NA_1121,66_TRUE_VAR5_ALK	Isovaleric acid, 2-oxo- (1MEOX) (1TMS) BP	884944137	232020849		257697283			558050824		438128178	500227900	296348859	356069596		349084708	475448937	432612852			gmd_var_alk_mz_all_2011	847
*Pentanedioic acid, 2-(methoxyimino)-, bis(trimethylsilyl) ester	Pentanedioic acid, 2-(methoxyimino)-, bis(trimethylsilyl) ester	1438889183	1194564658	578910144	1153703304	2499609264	1144197568	2045165389	858043171	3352932937	3689276638	2253998729	2645552884	2963622980	2349789757	3367066089	2937384420			mainlib	846
*Propanoic acid, 2-amino-2-methyl-3-hydroxy- (3TMS)_M000893_A137008-101-x1[NA]_NA_1375,1_TRUE_VAR5_ALK	Propanoic acid, 2-amino-2-methyl-3-hydroxy- (3TMS)								16994844	70732523	49137686	59818843	48108516		215776202	240132316	198323696			gmd_var_alk_mz_all_2011	842
*Unknown#sst-cgl-004_M000000_A119012-101-x1[NA]_NA_1182,47_PRED_VAR5_ALK	Unknown 7				57052858					93419358	125771189	95516944	99965447	172379470	177175894	171587825	159483917			gmd_var_alk_mz_all_2011	841
Proline (1TMS)_M000029_A117006-101-x1[L-]_NA_1176,03_TRUE_VAR5_ALK	Proline (1TMS)	5287351981	2898942094		3594009567	1813019532		6941551857	117063405		8319646031	9956758747	11501041027	6444998917	11219000835	11028726969				gmd_var_alk_mz_all_2011	840
*Nicotinamide (1TMS)_M000271_A150004-101-x1[NA]_NA_1489,26_TRUE_VAR5_ALK	Nicotinamide (1TMS)	2131365038	2249089255	2061029377	2744488895	2064158038	1661827999	2289864871	1221534935	2010448411	2121988497	1571530900	1728305672	2237530780	2263215768	2351358828	2109980008			gmd_var_alk_mz_all_2011	840
*Valylvaline, N,N'dimethyl-N'-ethoxycarbonyl-, undecyl ester	Valylvaline, N,N'dimethyl-N'-ethoxycarbonyl-, undecyl ester													29073069	31613364	34719467				mainlib	840
Raffinose (11TMS)_M000049_A337002-101-xxx_NA_3350,64_TRUE_3494,90_MOSYS_TRUE_VAR5_ALK	Raffinose (11TMS)											52595342				62200527				gmd_pred_mosys-ri	840
*D-Limonene	D-Limonene	17273622						11993397								10803143				mainlib	838
*NA_M000000_A214003-101-xxx_NA_2127,28_PRED_2181,74_MOSYS_PRED_VAR5_ALK	Unknown 8		170835292		137602365	81874260	69413021		26852929	129249876		88931223		617692016	780117538	635388517	373625278			gmd_pred_mosys-ri	838
Inosine-5'-monophosphate (5TMS)_M001129_A298003-101-xxx_NA_2984,72_TRUE_3081,90_MOSYS_PRED_VAR5_ALK	Inosine-5'-monophosphate (5TMS)															44589707				gmd_pred_mosys-ri	838
1-(Palmitoyloxy)-3-((trimethylsilyl)oxy)propan-2-yl (Z)-hexadec-9-enoate	1-(Palmitoyloxy)-3-((trimethylsilyl)oxy)propan-2-yl (Z)-hexadec-9-enoate															46243680				mainlib	835
Muramic acid, N-acetyl- (1MEOX) (4TMS) MP_M001064_A227006-101-x1[NA]_NA_2276,07_TRUE_VAR5_ALK	Muramic acid, N-acetyl- (1MEOX) (4TMS) MP							155857171			140631307	92737918	205623019	903142660		884440166	823636254			gmd_var_alk_mz_all_2011	834
Lactobionic acid (TMS) MP_M001097_A279009-101-xxx_NA_2798,1_TRUE_2885,98_MOSYS_PRED_VAR5_ALK	Lactobionic acid (TMS) MP															45789666				gmd_pred_mosys-ri	834
Butanoic acid, 4-methylthio-2-oxo- (1MEOX) (1TMS) MP_M000923_A145013-101-x1[NA]_NA_1454,41_TRUE_VAR5_ALK	Butanoic acid, 4-methylthio-2-oxo- (1MEOX) (1TMS) MP	249397507	219505531	132187515	266079672	403975565	335320104		198364295	704279333	1001679762	569938865	681802239	1114216574	814811175	973774178	709548133			gmd_var_alk_mz_all_2011	830
Phosphoric acid, bis(trimethylsilyl) 2,3-bis[(trimethylsilyl)oxy]propyl ester	Phosphoric acid, bis(trimethylsilyl) 2,3-bis[(trimethylsilyl)oxy]propyl ester	192739772	407738758	314256482	310063068	139984435	251645859		182219329	129833809	119411977	160485935	178336729	526075626	513764358	582524456	458949354			mainlib	824
Phenylpyruvic acid (1MEOX) (1TMS) MP_M000572_A160002-101-x1[NA]_NA_1591,01_TRUE_VAR5_ALK	Phenylpyruvic acid (1MEOX) (1TMS) MP	812001952	816442071	583370814	925156760	624386089	334666885	694316898		832511584	1080668772	822170770	728746325	1209435652		1121781295	1068665333			gmd_var_alk_mz_all_2011	823
Ethyl pipecolinate	Ethyl pipecolinate	37579264						53674675		64025362	53956981	91276736	103384778	133627923	261970767	158926403	69515670			mainlib	822
Etoxeridine	Etoxeridine	4517645618		3742938186			8263796195		4373554800	8538398096	8732300991	8229921937	8474595443	1830205864	1704225574	1863630698	945845966			mainlib	822
Glyceraldehyde (1MEOX) (2TMS) BP_M000452_A123004-101-x1[S-]_NA_1194,03_TRUE_VAR5_ALK	Glyceraldehyde (1MEOX) (2TMS) BP															78171454				gmd_var_alk_mz_all_2011	821
Unknown#bth-pae-059_M000000_A107001-101-x1[NA]_NA_1060,6_PRED_VAR5_ALK	Unknown 10										26820796		20420387	226279592	57562320	59578953	38682965			gmd_var_alk_mz_all_2011	820
Phosphoric acid (3TMS)_M000075_A129001-101-xxx_NA_1262,42_TRUE_1273,79_MOSYS_PRED_VAR5_ALK	Phosphoric acid (3TMS)	8973879098	9040080903	8858065336	9259418611	8709358892			7415445011	7986529540	9375650066	8578091848	9922602825	10813479825	14864615044	14005869740	12161979936			gmd_pred_mosys-ri	820
Hexanedioic acid, bis(2-ethylhexyl) ester	Hexanedioic acid, bis(2-ethylhexyl) ester	1484129339	1540199708	1443326984	1506104496	1624222508				1560315677	1557569449	1422728311	1406584934	1525849672	1452192157	1521390404	1494761217			mainlib	820
Uridine (4TMS)_M000273_A246006-101-xxx_NA_2455,91_TRUE_2526,74_MOSYS_PRED_VAR5_ALK	Uridine (4TMS)	2359665254	2394404246	1636840320	2042670238	2802876314	3028492485	3107975578	1494444526	2893016395	3109484206	3053229110	3065456946	5916021447	5748030157	6052428858	5253428193			gmd_pred_mosys-ri	820
Unknown#sst-cgl-122_M000000_A266012-101-xxx_NA_2659,18_PRED_2740,14_MOSYS_PRED_VAR5_ALK	Unknown 11															21870054				gmd_pred_mosys-ri	820
Propylene glycol, 2TMS derivative	Propylene glycol, 2TMS derivative	31810597	30669140		32486593		29865626	38912359		23473091	43551866	33997906	33732626		27443342	45303401				mainlib	818
Carbodiimide (2TMS)_M000836_A100005-101-xxx_NA_953,17_PRED_949,14_MOSYS_PRED_VAR5_ALK	Carbodiimide (2TMS)	17329474	14606029	25102990	13607057	29473351	30531301	17764089	10589690	16643655	26576219		15779028	36569655	44699605	30437309	32205642			gmd_pred_mosys-ri	818
Propane, 2-methyl-1-nitro-	Propane, 2-methyl-1-nitro-															57646771				mainlib	817
Cadaverine, 4TMS derivative	Cadaverine, 4TMS derivative	5071337561	4759668008	3871507520	5341870725	7543480459	6991826512	6451442486	4341619302	4458711278	5934797164	3322970144	4810360578	7336736191	6056459326	6813781744	6375415101			mainlib	817
N-Acetyl-D-galactosamine, (isomer 2), 4TMS derivative	N-Acetyl-D-galactosamine, (isomer 2), 4TMS derivative	32839589	29047984	26183482	27589163	89518848		67363857		67055619	37191096	5929328	37846280	367175818	348727505	303276619	289704505			mainlib	817
Azulene	Azulene															14301698				mainlib	814
Vinyl ether	Vinyl ether														903593283	888411342				mainlib	813
2-Methyl-1,3-propanediol, 2TMS derivative	2-Methyl-1,3-propanediol, 2TMS derivative	38405567				44888835		42831540			52521568	44271689		51881315	45059608	54099277	48513533			mainlib	809
Fructose-1,6-diphosphate (1MEOX) (7TMS) BP_M000511_A272001-101-xxx_NA_2714,26_PRED_2797,96_MOSYS_PRED_VAR5_ALK	Fructose-1,6-diphosphate (1MEOX) (7TMS) BP														121844493	71861063				gmd_pred_mosys-ri	805
L-Isoleucine, 2TMS derivative	L-Isoleucine, 2TMS derivative	368043552	557566461	477892839	325301990	979097777	919917040	801221527	698829746	1822550866	2193051052			3492923047	4696755864	4912111802	4779121860			mainlib	804
Ornithine-1,5-lactam (2TMS)_M000728_A147003-101-x1[NA]_NA_1454,09_PRED_VAR5_ALK	Ornithine-1,5-lactam (2TMS)	55164594	53804125	46123746		44924863	44193540		35753973	38917186	39414132	62091446	29512323	66720183	63291364	71365356	63382013			gmd_var_alk_mz_all_2011	804
Glucose, 5TMS derivative	Glucose, 5TMS derivative													28754642		27317602				mainlib	803
Nonane, 5-methyl-5-propyl-	Nonane, 5-methyl-5-propyl-								181921778							37847552				mainlib	800
Decane, 2,9-dimethyl-	Decane, 2,9-dimethyl-															12990231				mainlib	800
Unknown#bth-pae-008_M000000_A103003-101-xxx_NA_1019,45_PRED_1018,72_MOSYS_PRED_VAR5_ALK	Unknown 12								24590160							14023801	14282988			gmd_pred_mosys-ri	791
3-Ethyl-3-methylheptane	3-Ethyl-3-methylheptane															10541254				mainlib	798
Adenosine (3TMS) (Derivate not found)_M000287_A261002-101-x1[NA]_NA_2612,19_PRED_VAR5_ALK	Adenosine (3TMS)	293386432	353968664	198381583	291595173	217125698	314097246	280417970		444469109	517826343	544644468	1170541061	1568592054		1508967713	3151680037			gmd_var_alk_mz_all_2011	797
Valine, N-methyl-N-methoxycarbonyl-, octyl ester	Valine, N-methyl-N-methoxycarbonyl-, octyl ester	21705062	23678100	20278772	19604252	27068059	25778503	28595166	14907720	38504885	47583456	38627008	41146162	89761065	98547976	111801510	74592327			mainlib	795
L-Methionine Sulfoxide, N,N-bis(triimethylsilyl)-, trimethylsilyl ester	L-Methionine Sulfoxide, N,N-bis(triimethylsilyl)-, trimethylsilyl ester									159145040	95826233		88622127	156153598	353914286	204329738	209799858			mainlib	794
Diamide	Diamide	1699925999	921543113		1255291453			1841580651		4981049398	5892467602	5795678315	5831162032		10848647820	11106562004	52293887			mainlib	793
Putrescine (4TMS)_M000186_A175002-101-xxx_NA_1734,98_TRUE_1754,00_MOSYS_TRUE_VAR5_ALK	Putrescine (4TMS)	4923019992	4395233414	3335370681	4974008125	6713567265	5913909232	5515360694	3193512670	5428725727	6584054345	4147813927	4870234143	6196670580	4831383897	5470222555	5263533502			gmd_pred_mosys-ri	793
Cyclopentasiloxane, decamethyl-	Cyclopentasiloxane, decamethyl-			10492556		9083282		11498285	5378022	6236453		8536271	11952328	9376480	8317844	13961213	12958073			mainlib	792
2-Pyrrolidinone, 1-methyl-	2-Pyrrolidinone, 1-methyl-															7721154				mainlib	791
Tetracosamethyl-cyclododecasiloxane	Tetracosamethyl-cyclododecasiloxane															8036585				mainlib	790
Ethanolamine, 2TMS derivative	Ethanolamine, 2TMS derivative								24590160							9195443				mainlib	789
4-Hydroxybutanoic acid, 2TMS derivative	4-Hydroxybutanoic acid, 2TMS derivative	116846822	94884481		88179350			93042271			113985313	92692435	99983479		203187981	212748403	217334608			mainlib	789
Glycine, di-TMS	Glycine, di-TMS									225968583	248850808	176699158	209854936		438831623	417235593				mainlib	788
Disiloxane, hexamethyl-	Disiloxane, hexamethyl-	33636175	32723384	23962840			20107771	44986579	17033358	56261435		61474946	49443214	267140192	226547433	297083430	134834253			mainlib	788
1,2-Benzisothiazole	1,2-Benzisothiazole															12321398				mainlib	787
1-Octylsilatrane	1-Octylsilatrane															15850384				mainlib	787
Homocysteine (3TMS)_M000021_A167001-101-x1[NA]_NA_1662,83_TRUE_VAR5_ALK	Homocysteine (3TMS)	76238113	65341072	46221081	73146987	61782231	66255277	50695413		78120448	76931474	53306953	60424725	143473088	166174481	164597464	171734460			gmd_var_alk_mz_all_2011	787
Alanine [+CO2] (2TMS)_M000000_A142001-101-x1[DL-]_NA_1395,2_PRED_VAR5_ALK	Alanine [+CO2] (2TMS)				91789285					204351573	157670834	153383630	175520041		213381595	228559318				gmd_var_alk_mz_all_2011	782
DL-Phenylalanine, TMS derivative	DL-Phenylalanine, TMS derivative	27921896			14480268					50642791		74383677	81884066		156510135	190424376	28310688			mainlib	781
Benzenepropanoic acid, α-(methoxyimino)-4-[(trimethylsilyl)oxy]-, trimethylsilyl ester	Benzenepropanoic acid, α-(methoxyimino)-4-[(trimethylsilyl)oxy]-, trimethylsilyl ester	744445513	716092699	454600835	802494110	759775669	504472928	671627487	301229847	1068627921	1473983846	783035602	944659418	1913452021	1575269527	1657094729	1424074954			mainlib	781
Ornithine, N2-acetyl- (4TMS)_M000409_A189020-101-xxx_NA_1965,41_TRUE_2011,81_MOSYS_PRED_VAR5_ALK	Ornithine, N2-acetyl- (4TMS)									20072996	28227412	26525203	19866680	65815559	58776108	76113683	64681850			gmd_pred_mosys-ri	781
Siloxane_M000870_A225011-101-xxx_NA_2256,43_PRED_2317,32_MOSYS_PRED_VAR5_ALK	Siloxane															11634616				gmd_pred_mosys-ri	740
Hexadecyl octyl ether	Hexadecyl octyl ether															38745423				mainlib	780
Succinic semialdehyde (1MEOX) (1TMS) BP_M000397_A118003-101-x1[NA]_NA_1182,03_TRUE_VAR5_ALK	Succinic semialdehyde (1MEOX) (1TMS) BP	49401180	153648747		41370757			51263730	96331976	105861946	36620432	28516585	43553335	58242067	51811741	83895549				gmd_var_alk_mz_all_2011	779
Fructose-1,6-diphosphate (1MEOX) (7TMS) MP_M000511_A272002-101-xxx_NA_2708,96_PRED_2792,40_MOSYS_PRED_VAR5_ALK	Fructose-1,6-diphosphate (1MEOX) (7TMS) MP													185759803	168642042	191270000				gmd_pred_mosys-ri	777
Benzenecarbothioic acid, 2,4,6-triethyl-, S-(2-phenylethyl) ester	Benzenecarbothioic acid, 2,4,6-triethyl-, S-(2-phenylethyl) ester														191074427	60891853	6647728			mainlib	774
NA168015 (classified unknown)_M000000_A168015-101-xxx_NA_1679,79_TRUE_1711,96_MOSYS_PRED_VAR5_ALK	Unknown 14	474979812	480097075	394593651	436742017	377831439	402514279	307554251	245453256	160575858	159311020	185760368	218955031			469422419	404625143			gmd_pred_mosys-ri	773
5'-Methylthioadenosine, 3TMS derivative	5'-Methylthioadenosine, 3TMS derivative	1018459447	1012123320	798433184	968309411	1093454088	1237297627	1012855282	630420215	881154246	925456632	707580229	695895197	1476449348	1263512082	1301820616	739347131			mainlib	773
NA_M000000_A354003-101-xxx_NA_3535,28_PRED_3659,88_MOSYS_PRED_VAR5_ALK	Unknown 15														40811561	41852198	37358197			gmd_pred_mosys-ri	771
Glycine (3TMS)_M000031_A133001-101-xxx_NA_1302,5_TRUE_1317,50_MOSYS_TRUE_VAR5_ALK	Glycine (3TMS)	2209671061	4089697391	1904680738	1688323200	1759093460	1601916458	1831890505	1050473659	2360339960	2353206380	2116018990	2386885936	3673613297	3150307910	3138286379	5815708630			gmd_pred_mosys-ri	770
D164543_M000000_A164017-101-xxx_NA_1645,42_TRUE_1675,87_MOSYS_PRED_VAR5_ALK	Unknown 16													279600437	266338810	301598219	275261681			gmd_pred_mosys-ri	770
Cycloheptasiloxane, tetradecamethyl-	Cycloheptasiloxane, tetradecamethyl-	13215667	16696153	18319653	18990038	26593886		40115486	20418839	12283229	62948394	14266053	33802152	44411952	12245462	47089398	39929314			mainlib	769
3-Trimethylsiloxyvaleric acid, trimethylsilyl ester	3-Trimethylsiloxyvaleric acid, trimethylsilyl ester															35733207				mainlib	768
Hypoxanthine (2TMS)_M000294_A182006-101-x1[NA]_NA_1808,98_TRUE_VAR5_ALK	Hypoxanthine (2TMS)	161326529	118270775	63786230		146842686	116150842		77381457	274972300	221268480	160430065			292809123	311975379	312944689			gmd_var_alk_mz_all_2011	767
N,N-Diethylheptylamine	N,N-Diethylheptylamine			313488128				9413962			7852810					1341014668	9063606			mainlib	766
Sucrose, 8TMS derivative	Sucrose, 8TMS derivative	5237879205	5342624141			6294065154	6093392740	5649810795	4301075272	6519592677		6311345839	1597325492	2048652408	8145594491	2056493120	2213586481			mainlib	766
D-Fructose, 1,3,4,5,6-pentakis-O-(trimethylsilyl)-, O-methyloxime	D-Fructose, 1,3,4,5,6-pentakis-O-(trimethylsilyl)-, O-methyloxime													45436403	73624941	53689421				mainlib	765
Pipecolic acid, N-ethoxycarbonyl-, dodecyl ester	Pipecolic acid, N-ethoxycarbonyl-, dodecyl ester	54702627	55894998	40464892	41358335	77730445	71769142	52553441		63730215	83562000	36435564	33276926	126642990	110339202	92412803	113289073			mainlib	765
Pyrene, 1,9-dimethyl-	Pyrene, 1,9-dimethyl-		14337251	3499475			17508479	4941523	8036485							26286171				mainlib	765
Xylobiose, D- (1MEOX) (6TMS) BP2_M000720_A242004-101-xxx_NA_2422,7_PRED_2491,88_MOSYS_PRED_VAR5_ALK	Xylobiose, D- (1MEOX) (6TMS) BP2						1167943776	577634725		858139777	788779010	786444486	1139980102		4169532795	4031943512	3881776030			gmd_pred_mosys-ri	764
NA_M000000_A239003-101-xxx_NA_2384,42_PRED_2451,69_MOSYS_PRED_VAR5_ALK	Unknown 18									795363070				1732121430		2126730043				gmd_pred_mosys-ri	764
Mannose-6-phosphate (1MEOX) (6TMS) BP_M000711_A233001-101-x1[D-]_NA_2313,44_TRUE_VAR5_ALK	Mannose-6-phosphate (1MEOX) (6TMS) BP															241927561				gmd_var_alk_mz_all_2011	763
Allantoin (4TMS)_M000092_A189007-101-xxx_NA_1876,44_PRED_1918,40_MOSYS_PRED_VAR5_ALK	Allantoin (4TMS)	233435606	228646936	171693956	228402516	260245601	259124838	258035120	107037785	279040087	326559188	197653117	199920631	523936977	379712007	422913349	418173148			gmd_pred_mosys-ri	762
Fructose-6-phosphate (1MEOX) (6TMS) MP_M000510_A232002-101-xxx_NA_2292,48_TRUE_2355,17_MOSYS_PRED_VAR5_ALK	Fructose-6-phosphate (1MEOX) (6TMS) MP														317387948	165470023				gmd_pred_mosys-ri	762
Fructose-1-phosphate (1MEOX) (6TMS) MP_M000509_A230003-101-x1[NA]_NA_2282,83_TRUE_VAR5_ALK	Fructose-1-phosphate (1MEOX) (6TMS) MP	128328923												197166799		142157632	82983338			gmd_var_alk_mz_all_2011	759
Benzene, 1,1'-(1,1,2,2,3,3-hexafluoro-1,3-propanediyl)bis[2,3,4,5,6-pentafluoro-	Benzene, 1,1'-(1,1,2,2,3,3-hexafluoro-1,3-propanediyl)bis[2,3,4,5,6-pentafluoro-				5425406								4512512			7602815				mainlib	758
Methane, trimethoxy-	Methane, trimethoxy-	274343700											470156127			284898797				mainlib	758
1,3,5-Trisiloxane, 1,1,3,3,5,5-hexamethyl-1,5-di(tert.butyl)-	1,3,5-Trisiloxane, 1,1,3,3,5,5-hexamethyl-1,5-di(tert.butyl)-		9246027868	9876001150			11879029302	2110921272	3109750013	10163072574	2413567688	5752633830		9318469766		1396118281	6565163099			mainlib	757
Butane, 1-isothiocyanato-	Butane, 1-isothiocyanato-															20482562				mainlib	757
DL-Alanine, N-methyl-N-hexyloxycarbonyl-, decyl ester	DL-Alanine, N-methyl-N-hexyloxycarbonyl-, decyl ester			511809												5206739				mainlib	757
Indole-3-lactic acid, 3TMS derivative	Indole-3-lactic acid, 3TMS derivative	231560610	240460716	139218465	233509123	442790559	268365226	320237844	140096063	298831259	369412284	210983620	253848233	559809785	430293481	493164850	517771024			mainlib	757
Dihydroxyacetone phosphate (1MEOX) (3TMS) BP_M000327_A177006-101-x1[NA]_NA_1746,58_TRUE_VAR5_ALK	Dihydroxyacetone phosphate (1MEOX) (3TMS) BP								460574865		949593315		863261875		1874799701	2308385312	1920704051			gmd_var_alk_mz_all_2011	756
l-Leucine, N-methyl-N-(2-methoxyethoxycarbonyl)-, dodecyl ester	l-Leucine, N-methyl-N-(2-methoxyethoxycarbonyl)-, dodecyl ester		41480603	43237608	29795821	46463546	44195965	40098679	24969035	89555646	78220384	59702654	107449917	174823003	163793449	137793728	168754701			mainlib	755
Sulfuric acid, 2TMS derivative	Sulfuric acid, 2TMS derivative															78660809				mainlib	754
(Z)-5-Methoxy-3,5-dimethyl-2-hexenyltrimethylsilane	(Z)-5-Methoxy-3,5-dimethyl-2-hexenyltrimethylsilane		5292926	123195345		177764098	244278627							138418284	145876629	150804613	99749105			mainlib	753
Decane, 3-ethyl-3-methyl-	Decane, 3-ethyl-3-methyl-			38129667												26646102				mainlib	753
NA_M000000_A287007-101-xxx_NA_2866,73_PRED_2958,03_MOSYS_PRED_VAR5_ALK	Unknown 20															8882695				gmd_pred_mosys-ri	753
Cyclopropane, 1-methyl-2-(3-methylpentyl)-	Cyclopropane, 1-methyl-2-(3-methylpentyl)-					271680591	258032636							227862865		6769239	79263222			mainlib	752
NA_M000000_A277004-101-xxx_NA_2754,72_PRED_2840,44_MOSYS_PRED_VAR5_ALK	Unknown 21										19907795	28745831	50002773			14636694	70584843			gmd_pred_mosys-ri	752
Indole-3-pyruvic acid (1MEOX) (2TMS) MP_M001050_A219009-101-x1[NA]_NA_2197,08_TRUE_VAR5_ALK	Indole-3-pyruvic acid (1MEOX) (2TMS) MP		600854887	461100822	643055245	630290852	402477487	350196488	238503737	254539045	400040547	207839282	280698044	593670726	253571299	391635283	371685113			gmd_var_alk_mz_all_2011	751
Unknown#bth-pae-035_M000000_A153019-101-xxx_NA_1521,51_PRED_1545,79_MOSYS_PRED_VAR5_ALK	Unknown 22									70666137	90239746		77700475	39386949	104705561	62682332	59186128			gmd_pred_mosys-ri	747
Glucopyranose [-H20] (4TMS)_M000040_A177004-101-xxx_NA_1755,94_TRUE_1791,90_MOSYS_PRED_VAR5_ALK	Glucopyranose [-H20] (4TMS)		901235770	261148782		799888559	743788962	660678121		905868677				5056854147	4831471713	4713964619	4529158816			gmd_pred_mosys-ri	745
Phosphoric acid, 3-(methoxyimino)-2-[(trimethylsilyl)oxy]propyl bis(trimethylsilyl) ester, (±)-	Phosphoric acid, 3-(methoxyimino)-2-[(trimethylsilyl)oxy]propyl bis(trimethylsilyl) ester	49540425	50928876	36525276	44837903			63574444	29065438	59877082	19689417	19178039		83193162		93269208	76900679			mainlib	744
4-Pyridinol, TMS derivative	4-Pyridinol, TMS derivative		14206916			13754577		21100028	16048931		33369686	20700490			27030013	27395588	26697556			mainlib	743
NA170001 (classified unknown)_M000000_A170001-101-xxx_NA_1688,9_PRED_1721,52_MOSYS_PRED_VAR5_ALK	Unknown 23															7874498				gmd_pred_mosys-ri	743
2,2,4,4,5,5,7,7-Octamethyloctane	2,2,4,4,5,5,7,7-Octamethyloctane															54193273				mainlib	742
Glucose-6-phosphate, 2-amino-2-deoxy- (1MEOX) (6TMS) BP_M000771_A236010-101-x1[NA]_NA_2358,48_TRUE_VAR5_ALK	Glucose-6-phosphate, 2-amino-2-deoxy- (1MEOX) (6TMS) BP					31624299	48817088	28928361			65052238	89208369	70575105		406085106	470327701	253202190			gmd_var_alk_mz_all_2011	742
Silane, diethylbutoxypentyloxy-	Silane, diethylbutoxypentyloxy-	21315750	21225363	13613479		25144242	19591951	22502417		30459136	24897064	23692174	28835454	164170601	141201624	135480211				mainlib	741
DL-Alanine, N-methyl-N-(byt-3-en-1-yloxycarbonyl)-, byt-3-en-1-yl ester	DL-Alanine, N-methyl-N-(byt-3-en-1-yloxycarbonyl)-, byt-3-en-1-yl ester	80075765	32838167		60160689	89598206		88150105		83124239	63259397	51722237	39090937	85100772	47598895	57187172	55248102			mainlib	740
Alanine, N-methyl-n-propargyloxycarbonyl-, heptyl ester	Alanine, N-methyl-n-propargyloxycarbonyl-, heptyl ester									159866571				66477165	53881326	35123638	254966146			mainlib	740
Unknown#sst-cgl-114_M000000_A229006-101-xxx_NA_2290,3_PRED_2352,88_MOSYS_PRED_VAR5_ALK	Unknown 26													40905108	49892180	30582231				gmd_pred_mosys-ri	740
{4-Methoxy-2-[(trimethylsilyl)oxy]phenyl}{2-[(trimethylsilyl)oxy]phenyl}methanone	{4-Methoxy-2-[(trimethylsilyl)oxy]phenyl}{2-[(trimethylsilyl)oxy]phenyl}methanone	16193719	16525335		16940443			19127098	8304189	11977092	20219521	20092585	22728953	26628493	55276834	47852531	27209309			mainlib	738
Trehalose, alpha,alpha'-, D- (8TMS)_M000671_A274002-101-xxx_NA_2726,3_TRUE_2809,10_MOSYS_TRUE_VAR5_ALK	Trehalose, alpha,alpha'-, D- (8TMS)								15476079		22789470				34624093	18584233				gmd_pred_mosys-ri	718
Norleucine, N-trimethylsilyl-, trimethylsilyl ester	Norleucine, N-trimethylsilyl-, trimethylsilyl ester													65012987	65147359	70453630	50347591			mainlib	737
Furfuryl alcohol, TMS derivative	Furfuryl alcohol, TMS derivative													66656951	44524649	53448636				mainlib	736
5-(Piperidin-1-ylmethyl)-3-pyridin-3-yl-5,6-dihydro-4H-1,2,4-oxadiazine	5-(Piperidin-1-ylmethyl)-3-pyridin-3-yl-5,6-dihydro-4H-1,2,4-oxadiazine	21917432				19852591										18311312				mainlib	736
Glutamine, DL- (3TMS)_M000032_A178001-101-xxx_NA_1766,72_TRUE_1786,50_MOSYS_TRUE_VAR5_ALK	Glutamine, DL- (3TMS)	721688274		333330227	557883786	1973241351	2187079948	2029063694	1285393959	4061614925	4276162420	3829103533	3270939394	3827131063	4469196634	4702169167	3765524134			gmd_pred_mosys-ri	736
Acetic acid, TMS derivative	Acetic acid, TMS derivative		18876469								41261966		33966773			39223006				mainlib	734
Glucose-6-phosphate (1MEOX) (6TMS) MP_M000513_A233002-101-xxx_NA_2307,34_TRUE_2370,77_MOSYS_PRED_VAR5_ALK	Glucose-6-phosphate (1MEOX) (6TMS) MP	3236408305	3431838135	2229847357	3540993886	2864520608	3632359107	3230291726	1919756922	3075108811	2750399571	3585370879	4135739577	9360881475	9935264882	6299208384	5685151218			gmd_pred_mosys-ri	734
5-Methyluridine, 3TMS derivative	5-Methyluridine, 3TMS derivative															287744987				mainlib	734
Silanamine, N-[2-[2-methoxy-4-[(trimethylsilyl)oxy]phenyl]ethyl]-1,1,1-trimethyl-N-(trimethylsilyl)-	Silanamine, N-[2-[2-methoxy-4-[(trimethylsilyl)oxy]phenyl]ethyl]-1,1,1-trimethyl-N-(trimethylsilyl)-													85491959	67273536	69415421	66311538			mainlib	733
Maltitol, nonakis(trimethylsilyl) ether	Maltitol, nonakis(trimethylsilyl) ether															7355327				mainlib	733
l-Norvaline, n-propoxycarbonyl-, undecyl ester	l-Norvaline, n-propoxycarbonyl-, undecyl ester												26881790	155964999	155080107	151642014	108713753			mainlib	731
N,N'-Diacetylchitobiose (1MEOX) (6TMS) MP_M001136_A301006-101-xxx_NA_3018,88_TRUE_3117,76_MOSYS_PRED_VAR5_ALK	N,N'-Diacetylchitobiose (1MEOX) (6TMS) MP						278968662			384990824	373828433	315062262	352410039	879418340	961385582	928573216	843871512			gmd_pred_mosys-ri	730
Pyridine, 3-methyl-2,6-diphenyl-	Pyridine, 3-methyl-2,6-diphenyl-	94567523		17901707	30782698	199695196		226957668			518375110	233667582	246733117		145017530	216839091				mainlib	729
Dodecane, 2,6,10-trimethyl-	Dodecane, 2,6,10-trimethyl-															35756941				mainlib	729
Ribulose-5-phosphate (1MEOX) (5TMS) MP_M000769_A212012-101-x1[NA]_NA_2102,51_TRUE_VAR5_ALK	Ribulose-5-phosphate (1MEOX) (5TMS) MP_M000769_A212012-101-x1[NA]_NA_2102,51_TRUE_VAR5_ALK		818762012									916996709			3190286976	1501897841	960266057			gmd_var_alk_mz_all_2011	729
Pyridine, 1-oxide	Pyridine, 1-oxide							148452138		259600623	390706337	130333548	205884330		305977716	292389103	161354188			mainlib	728
Glucose-6-phosphate, 2-amino-2-deoxy- (1MEOX) (6TMS) MP_M000771_A236009-101-x1[NA]_NA_2346,1_TRUE_VAR5_ALK	Glucose-6-phosphate, 2-amino-2-deoxy- (1MEOX) (6TMS) MP				25719261			50640724	23487949		68993196		104908122	355804120	374358752	365646110	263280600			gmd_var_alk_mz_all_2011	728
d-Proline, N-ethoxycarbonyl-, heptyl ester	d-Proline, N-ethoxycarbonyl-, heptyl ester													70842898	65454921	73770115	59797538			mainlib	727
2-Butene-1,4-diol, (E)-, 2TMS derivative	2-Butene-1,4-diol, (E)-, 2TMS derivative															26520338				mainlib	726
D-Ribofuranose, 2,3,5-tris-O-(trimethylsilyl)-, bis(trimethylsilyl) phosphate	D-Ribofuranose, 2,3,5-tris-O-(trimethylsilyl)-, bis(trimethylsilyl) phosphate														150329660	125484697				mainlib	725
Octane, 2,7-dimethyl-	Octane, 2,7-dimethyl-															84638713				mainlib	724
Unknown#sst-cgl-078_M000000_A184036-101-xxx_NA_1840,13_PRED_1880,28_MOSYS_PRED_VAR5_ALK	Unknown 28	52420399	52512765	58760283	54398043	22454521	29474756	31480793	16010947	77015236	50745481	63408194	101304666	160719297	149722714	131447671	148706827			gmd_pred_mosys-ri	724
Pantothenic acid tritms	Pantothenic acid tritms															344143206				mainlib	724
Monomethyl succinate, trimethylsilyl ester	Monomethyl succinate, trimethylsilyl ester	256014313	224168960		235979299	382263587		277571388	162633172		370640322	226763581	236366319	656915703		423494526	509192555			mainlib	721
Hydrobenzoin, 2TMS derivative	Hydrobenzoin, 2TMS derivative															12140539				mainlib	721
Bernzothiazole, 2-[2-(2-fluorophenoxy)ethylthio]-	Bernzothiazole, 2-[2-(2-fluorophenoxy)ethylthio]-	174344888	170163595	160470486	170337640	195887156	17271624	14117652		186629191	194430554	172972341	163779588	209043927	202740942	215332345	194895941			mainlib	720
D-Mannose, 2,3,4,5-tetrakis-O-(trimethylsilyl)-, O-methyloxime, 6-[bis(trimethylsilyl) phosphate]	D-Mannose, 2,3,4,5-tetrakis-O-(trimethylsilyl)-, O-methyloxime, 6-[bis(trimethylsilyl) phosphate]	3233206754	3428431378	2227679878	3537424352	2861624268	3628765363	3227090024	1917904716	3072080188	2747699434	3581740375	4131496056	9349223813	9922951481	9474182662	5678174529			mainlib	720
Unknown#sst-cgl-040_M000000_A163017-101-xxx_NA_1628,54_PRED_1658,15_MOSYS_PRED_VAR5_ALK	Unknown 29	37196246	34845075		31150270	96402021	133722481	61175751	35016058	161339630	192096903	120767784	217818333		952419087	816919164	743858794			gmd_pred_mosys-ri	719
2,5-Di(trifluoromethyl)benzoic acid, 4-nitrophenyl ester	2,5-Di(trifluoromethyl)benzoic acid, 4-nitrophenyl ester					706039										14968925				mainlib	719
D-(-)-Ribofuranose, tetrakis(trimethylsilyl) ether (isomer 1)	D-(-)-Ribofuranose, tetrakis(trimethylsilyl) ether (isomer 1)					308818939	269661073		117413716				392328927	2336164229	2201264992	2307525741	1953701668			mainlib	718
4-Chloro-1-azabicyclo[2.2.2]octane	4-Chloro-1-azabicyclo[2.2.2]octane										15056639					11099750				mainlib	716
Ornithine, N2-acetyl- (3TMS)_M000409_A200002-101-xxx_NA_1997,44_TRUE_2045,43_MOSYS_PRED_VAR5_ALK	Ornithine, N2-acetyl- (3TMS)	222909744	206993011	148728654	249575091	338532938	293638376	314946005	188968173	287746395	337779235	213412573	297021262	746968412	517148820	587513335	618819162			gmd_pred_mosys-ri	716
3-Indolylacetamide, TMS derivative	3-Indolylacetamide, TMS derivative													24040545		21303799				mainlib	716
Tridecane, n-_M000533_A130004-101-x1[n-]_NA_1293,26_PRED_VAR5_ALK	Tridecane, n-_M000533_A130004-101-x1[n-]							73703385			81525411					101667831				gmd_var_alk_mz_all_2011	715
N-Ethyl-2-carbethoxyazetidine	N-Ethyl-2-carbethoxyazetidine													3861093416		2371744127				mainlib	715
1-Methoxy-2-propanol, TMS derivative	1-Methoxy-2-propanol, TMS derivative				21612865						35939715				50942556	64931697				mainlib	714
l-Norvaline, N-ethoxycarbonyl-, pentadecyl ester	l-Norvaline, N-ethoxycarbonyl-, pentadecyl ester													48266787	45341965	51635223	40430750			mainlib	714
L-Asparagine, Nγ-[2-(acetylamino)-4-O-[2-(acetylamino)-2-deoxy-3,4,6-tris-O-(trimethylsilyl)-β-D-glucopyranosyl]-2-deoxy-3,6-bis-O-(trimethylsilyl)-β-D-glucopyranosyl]-	L-Asparagine, Nγ-[2-(acetylamino)-4-O-[2-(acetylamino)-2-deoxy-3,4,6-tris-O-(trimethylsilyl)-β-D-glucopyranosyl]-2-deoxy-3,6-bis-O-(trimethylsilyl)-β-D-glucopyranosyl]-													62294796	79599153	60224441	45791809			mainlib	714
Silanol, trimethyl-, carbonate (2:1)	Silanol, trimethyl-, carbonate (2:1)		2686407416	1737995469			1791550835			2069805417	61843576	207192304		3009177569	97914460	158834083				mainlib	710
Unknown#bth-pae-014_M000000_A117009-101-xxx_NA_1167,66_PRED_1174,31_MOSYS_PRED_VAR5_ALK	Unknown 30											15038080			24186080	61054516				gmd_pred_mosys-ri	710
Pipecolic acid, 2TMS derivative	Pipecolic acid, 2TMS derivative							90075297	92640916		141765080		120651219	552474654	502024111	616290455	548294337			mainlib	710
α-D-Lactose, 8TMS derivative	α-D-Lactose, 8TMS derivative															30386684				mainlib	710
Sulfurous acid, decyl 2-ethylhexyl ester	Sulfurous acid, decyl 2-ethylhexyl ester															58473370				mainlib	709
Cyclodecasiloxane, eicosamethyl-	Cyclodecasiloxane, eicosamethyl-	93262118	138179492	187340984	135348637	307393661	244746924	153663465	95449853		331677654	139286579	327702726	464865204	63621223	466490582				mainlib	708
3-Butene-1,2-diol, 1-(2-furanyl)-	3-Butene-1,2-diol, 1-(2-furanyl)-															13471343				mainlib	708
D-Erythro-Pentose, 2-deoxy-3,4-bis-O-(trimethylsilyl)-, 5-[bis(trimethylsilyl) methoxyphosphorimidate]	D-Erythro-Pentose, 2-deoxy-3,4-bis-O-(trimethylsilyl)-, 5-[bis(trimethylsilyl) methoxyphosphorimidate]												77182276	209727398	221326464	278706570				mainlib	708
5-Hydroxytryptophan, 4TMS derivative	5-Hydroxytryptophan, 4TMS derivative												7161887	49720464	58452834	53314609	48379321			mainlib	708
1-Aminocyclopentanecarboxylic acid, 3-chloropropoxycarbonyl-, tridecyl ester	1-Aminocyclopentanecarboxylic acid, 3-chloropropoxycarbonyl-, tridecyl ester							10737353						74996428	57083602	65594037	67607870			mainlib	707
4,4'-Biphenyldiol, 2TMS derivative	4,4'-Biphenyldiol, 2TMS derivative					5607752	4556436			3884064	5688889			10475641	9417094	7417718	7442178			mainlib	705
Thymidine, 3'-O-(trimethylsilyl)-, 5'-[bis(trimethylsilyl) phosphate]	Thymidine, 3'-O-(trimethylsilyl)-, 5'-[bis(trimethylsilyl) phosphate]															55550754				mainlib	705
NA_M000000_A235007-101-x1[NA]_NA_2322,67_PRED_VAR5_ALK	Unknown 31															296144850				gmd_var_alk_mz_all_2011	704
1-Morpholinopropan-2-ol trifluoroacetate	1-Morpholinopropan-2-ol trifluoroacetate					62096990	231982643	303936959				304388015		256884355	359589252	590038671	148558701			mainlib	703
beta-Alanyl-lysine (6TMS)_M001083_A255007-101-x1[L-]_NA_2553,19_TRUE_VAR5_ALK	beta-Alanyl-lysine (6TMS)_M001083_A255007-101-x1[L-]_NA_2553,19_TRUE_VAR5_ALK						66470543	83054848	31548313	76844119	100859673	96033754	94733633	308968729	317262534	402871087	284285430			gmd_var_alk_mz_all_2011	702

## Sheet: Summary
	3h V1	3h V2	3h V3	3h V4	6h V1	6h V2	6h V3	6h V4	3h C1	3h C2	3h C3	3h C4	6h C1	6h C2	6h C3	6h C4	Medium	Blank Percentage
Dodecane	368484294	270186979	233575507	323283273	311557629	356153990	301316315	129425102	286820279	298178790	267762819	249674384	242626673	300873584	312185261	229165322	292660844	1.04492
L-Threonine, 3TMS derivative	3601170908	3474391806	3253156857	3112019894	4289167890	4066736185	3810556907	2353587113	5018005215	5435403889	4734412489	5119835774	7620713225	6493936158	6618181273	6422974845
*Hydroxylamine (3TMS)	5096259001	4512617811	4508330948	4555608453	4920998367	4485998449	4967212484	2628517650	3429151592	2072519552	3792819384	4262312673	4445748716	3798284922	3714310476	3629312168	4847711458	1.1966
L-Leucine, TMS derivative	963936987	581516895		619234828	143462987		795365042		1736296036	1596774599	2490940510	3124194134	796748348	3936158473	4212380647
Lactic Acid, 2TMS derivative		1444016811		1426520045			2033136894		2804923220	2036829241	2204765816	2534164377		4389207039	4784297002		890745352	0.33886
Maltose (1MEOX) (8TMS) BP_M000048_A277002-101-xxx_NA_2745,49_TRUE_2845,00_MOSYS_TRUE_VAR5_ALK	134808909	132200338	62853805	140638917	170821341	175368427	146972080	73945334	141708444	118129035	124325945	157280467	630505707	572345003	488658657	445305797
Valine (2TMS)_M000030_A122001-101-xxx_NA_1207,1_TRUE_1227,10_MOSYS_TRUE_VAR5_ALK	2414574987	2808840264	2997170324	2055024698	5579565012		4125703952	3207167857	4810807477	4330828557	3679583787	5667670007	12835546576	7114984607	7654125987	9643831510	10849298	0.00206194
*Ribose	1312764066	1137515990	630324348	958989692	1017446604	838649680	1320946412	625981097	1602195892	1303930758	1961452928	2050462018	5880278316	5860820751	6382787988	4873615297
*Trehalose (8TMS)	5275008290	5381225535			6343038190	6138912998	5690769728	4331124186	6551987347		6352269184	6893668065	8817980895	8221447551	8203217141	8835489606
Phenylalanine, 2TMS derivative	1190724542	1358149899	729105265	951040287	908917333	774019370	1465886040	684321930	2556109515	2251630136	2450563660	2935815501	4481632436	5578006390	5745888914	4975552229
*Adenine (2TMS)	2095737499	2070149589	1647987760	1758680363	1958695313	1801719466	1981067385	1146233638	2140205804	2139369183	1495340111	1895976525	3234195859	2916110070	2988609204	2924906304	198343755	0.092806
*Carbitol	1847007794	1835834199		2189928014	2073757835		2865374039	1717171071	1506167787	3356470383	1885682799	2948525177	2682408436	1740203973	3102588873	2644235513	932706671	0.403079
*2-Deoxyadenosine (3TMS)									58102747	37702286	51317466	80706506	222708938	188150018	209004872	218802416
*Palmitic Acid (1TMS)	5386802516	4843094468	4559044566	4792954672	4943032710	4877763277	4326705419	2885600308	5554692658	5174600308	4664017279	4887976325	4930518890	4671868456	4992602465	4975099865	3857121013	0.807073
*Adenosine-5-monophosphate (4TMS)	673105388	1151783086	688611944	1186210868	1320926352	2477353426	2266156597	384123688	1015232450	1582034195	1485182461	1547806662	3514767150	1111150220	3922543154	2411030286	21962860	0.0131426
*NA_M000000_A352002-101-x1[NA]_NA_3516,3_PRED_VAR5_ALK	498414309	532341337	328703963	471413506	723701997	799464119	888117266	435858986	352600649	401859032	381566572	519942532	881534085	1024477843	1012941892	789043663
*Unknown#bth-pae-013_M000000_A116014-101-x1[NA]_NA_1158,99_PRED_VAR5_ALK	4554712313	4628518887	4738650305	4565597504	5949193609	5074969235	6462142595	4279112694	3855780712	5670967678	5066477806	5311945638	6455462199	4056371361	5323559524	4730272365	2549491133	0.505327
*2-Ketoisocaproic acid (1TMS)	1364015781	1180739498	1062140671	1452604214	1669314548		1333816494	614163297	2093007014	2483081849	1784843617	2048371112	5090860827	2482612507	2772039785	2171731881
*Propylene glycol (2TMS)	1331240893	1123687759		1181885429	1429166956	1254419277	1609443796		1045599769	1750735965	1417853000	1447602294	1551999146	1238319865	1729623554		810014353	0.581406
Galactinol (9TMS)_M000673_A299002-101-xxx_NA_2966,29_TRUE_3070,40_MOSYS_TRUE_VAR5_ALK											51478410		47952475	55497226	68642149	36739900
*Fumaric acid (2TMS)	1054370859	953543629	792058442	930704949	1534478432	1181701854	1099836435	511570760	1970665953	2220039680	1491281281	1496250720	3034622716	2916279334	2853099449	3264715222	94353004	0.0552879
*Maltotriose (11TMS)					50879457	51413034	65347305					53291792	145763545	160482362	157817373	102739761
*NA_M000000_A352002-101-x1[NA]_NA_3516,3_PRED_VAR5_ALK	498414309	532341337	328703963	471413506	723701997	799464119	888117266	435858986	352600649	401859032	381566572	519942532	881534085	1024477843	1012941892	789043663
Asparagine (3TMS)_M000013_A168001-101-x1[DL-]_NA_1666,44_TRUE_VAR5_ALK	1568091822	1168197194			1215747925	1059007940	1530160040		614214622	1487632263	946103154	784950422	1810758219	1973050586	2160911548	1614456420
L-Alanine, 2TMS derivative	6460453721	5645651580		3720931013			7564831375		7095544513	6544036468	5467996416	7220739961		9254013075	9512801587
*7-(Trimethylsilyl)-2,6-bis[(trimethylsilyl)oxy]-7H-purine	1538474156	1491244960	913325376	844923439	1597450916		1755887459	765842758	1155502265	1076562372	925889630	1065457762	3003908174	3214648707	3335455147	2677772349
*Isovaleric acid, 2-oxo- (1MEOX) (1TMS) MP_M000449_A116004-101-x1[NA]_NA_1095,76_TRUE_VAR5_ALK	643081275	465357967		462666082			589050169		869688476	1057911597	644437874	791424682		748564703	1136972643
*Methylal	525016391	74294346	352876017	485992059	676190211		591414049	237142274	915859377	776348660	771445125	752558021	1310228071	1459111943	1432161266	3049065408	48150325	0.0538606
*Dihydroxyacetone phosphate (1MEOX) (3TMS)	445753992	406806937	245874165	334970001	397153230	354725539	579537938	328812445	385657736	499989988	484441115	463011593	1572853770	1433512376	1961567341	1533116378
*Glucose-6-phosphate, 2-amino-2-deoxy- (6TMS)				35326180	59951501	73208481	84786406	35374626	153801836	168979573	313901906	191619771	1168959241	1441231934	1296701535	615491486
*NA114002 (classified unknown)_M000000_A114002-101-x1[NA]_NA_1129,96_TRUE_VAR5_ALK	9041381555	8258312938		7936626904			7857777840		7617687854	7503357906	6852893617	7271087492	13228146868	7373158791	7771113425	7289844185	5236889762	0.641243
*Homoserine (3TMS)	177899904	179744442	111480442	131965000	232637650	283910324	201046038	101362024	477361210	571396431	518995265	532398458	1129516773	1098995237	1082617859	865258951
*Uridine 5'-monophosphate (5TMS)	828198614	895148250	430821529	755058810	485257469	1080549152	1299155769	653473329	269882849	801555341	370603699	739843127	459012395	321053309	471567187	287978358
L-Glutamic acid, 3TMS derivative	4519148827	4552311982	3744111927	3961176199	7606279680	8266565205	6642247347	4375131114	8541749084	8735899095	8233076889	8477965592	5475569178	3131897874	2891867068		45211647	0.00760669
*Butanoic acid, 2-amino- (1TMS)									164937966	222940681	233514568	154140761		240410176	246759976
L-Proline, 2TMS derivative	3940811306	5425078419	7111640193	3787636110	13466608687		8660277131	8231325132	10442463920	11130235837	9463543944	8684580016	24559711003	17087391329	17534702429	18059861975	29677457	0.00265632
*Stearic acid (1TMS)	4222862451	3953551764	3746607587	3874652669	4234998436	3940932190	3440746785	3245930369	5116185136	4390325574	4517714509	4467354883		4642294179	4915907219	5022521120	3618220567	0.851579
*2,2'-Bipyrrolidine	5283278629	2897155446		3591809613	1811999329		6933883706	116900879	10038039312	8309148955	9958301071	11502243536	6438876112	13199098589	11029245493
*Pyrophosphate (4TMS)	1568091822	1168197194	664632061	1361506025	1215747925	1059007940	1530160040	559443212	614214622		946103154	784950422	1810758219	1973050586	2160911548	1614456420	12020287	0.00947413
Dodecane, 2,7,10-trimethyl-	165592318	125417558	115733009	141328462	140662774	180956039	123978474		111535038	119361077	110434100	105580093		122966981	140618145	109597022	130407981	1.00659
*Pyrrole-2-carboxylic acid (2TMS)	87127937	79945690		64574655	209709279	184009813	126794327	74321838	316333414	381036054	265683979	337411841	653316063	741135157	694448097	626967923
*Glycyl-proline (3TMS)	43065230	46541793	35008805	42877967	120525963	108842859	113530627	61385349	114326799	126203387	104292540	276212018	1387574100	1283000914	1372770171	1297857304
Malic acid (3TMS)_M000065_A149001-101-xxx_NA_1478,99_TRUE_1503,50_MOSYS_TRUE_VAR5_ALK	1548850864	1336845937	817598463	1187800066	1678176546	1303540265	1705917125	803050293	2338724977	2817151779	2095485492	2359851582	3899168730	3385473460	3859070432	3230416139
*NA_M000000_A184003-101-xxx_NA_1820,79_PRED_1859,98_MOSYS_PRED_VAR5_ALK	3565318685	3016395808	2216008273	2849097201	3340899780	2617876301	3194484757	1611789436	5068861428	5309980464	4452386810	4213507218	2604107342	2659913208	2721446882	2927087692
Tyrosine (3TMS)_M000035_A194002-101-xxx_NA_1934,12_TRUE_1954,60_MOSYS_TRUE_VAR5_ALK	819738183	874734977	532945086	597388206	1188386231	1201909353	1327685561	651884414	2590522230	2519117770	2594259098	2990039644	5579111341	5656432130	6074272984	5660799981
*Thymine (2TMS)	346587154	361832578	336690658	345962364	340055452	327577990	283597926	237887786	413805549	357691545	272538541	493299207	1186188435	933880806	1068642014	1060750235	138296968	0.264462
Spermidine (5TMS)_M000106_A226002-101-xxx_NA_2251,32_TRUE_2284,00_MOSYS_TRUE_VAR5_ALK	968748223	932852045	886275608	985485129	909705731	911311916	1073490103	482538377	1909873945	1159975151	1308530846	928557290	1120293477	931455945	971534646	854492699
*4-Trimethylsilylphenol	23708232	23261704		22742685	29208594		36989522		26434191	31781040	29907578	27183937		48280965	32568603		30963119	1.02568
*Alanyl-alanine (2TMS)	724042259	740436742	438683767	603517401	503757702	417492864	533827497	263255123	868500843	996790810	737166900	879137811	2149533690	2176050702	2087955260	2021108338
*Butanoic acid, 4-amino- (3TMS)	238499122	228365144	167152968	206433272	507879286	444487869	401768007	214443027	665632375	686902707	593131981	843516352	2129536524	1955669425	2023043164	1698399180
Proline [+CO2] (2TMS)_M000029_A159001-101-x1[NA]_NA_1583,16_TRUE_VAR5_ALK	472105695	430035017	801051340	460638015	1361200219	530203747	692589443	320995475	3159725158	2150143465	2697840941	4094808470	3539718432	3890111914	4607414472	3843756605
L-Valine, TMS derivative	1700963228	921824798		1255848185			1842693334		4985451510	5897864411	5801012730	5836094217		9848878178	9998783790
*Pentanoic acid, 2-(methoxyimino)-3-methyl-, trimethylsilyl ester	394528026	118093998		457654034	170574397		330538327	215515707	587574012	1089264430	649608882	767518979	922323447	907430757	1115624444	944900780
*Butanoic acid, 2-hydroxy- (2TMS)_M000888_A111002-101-x1[NA]_NA_1111,63_TRUE_VAR5_ALK	64662500	128720617		119288906			82677789		184567030	193754374	162633565	132903296		180375509	194271046		99897774	0.691882
Leucine (2TMS)_M000025_A129002-101-xxx_NA_1264,43_TRUE_1282,60_MOSYS_TRUE_VAR5_ALK	1057666592	1295719939	3467807162	743427986	3191610344	4669146982	1559001109	1200636752	2087804122	1958091339	1505751695	2033734011	9713962860	4809123976	5057046002	5822483027
*Glucose-6-phosphate (1MEOX) (6TMS) BP_M000513_A235002-101-x1[NA]_NA_2328,97_TRUE_VAR5_ALK	787881397	894403605	331455737	916462031	520308424	1010764412	604465256	289042322	683142652	428776636	628226524	948328426	3801757125	4022402798	3891347391	3357918829
*Uracil (2TMS)_M000456_A136001-101-x1[NA]_NA_1335,93_TRUE_VAR5_ALK	1499440085	1521024215	1266630196	1279175141	2009458595	1809540573	1839130806	1166392925	1769387214	1660598326	1509084740	1725617113	2807808356	2629539377	2639455859	2330467255	324502213	0.176224
*Unknown#bth-pae-001_M000000_A097001-101-x1[NA]_NA_959,45_PRED_VAR5_ALK	1411293679			649554921	789493926				1354235948	2987823217	1837514678	1892102796		2148965856	2423545954
*Methyltris(trimethylsiloxy)silane	149613314	130163558	113285335	132577934	194307778	182090223	200423763		134257731	167721008	170711598	145003029	348573356	171212929	194615020		88976238	0.511661
*3-Methyl-2-oxopentanoic-acid_2_1MeOX_1TMS_M000000_A119010-101-x1[NA]_NA_1189,12_PRED_VAR5_ALK	178439288	131851574		174715929	208372285		164699322	66156493	310146045	342424018	205223614	231119163	323129276	259013025	302649160	244131892
β-Alanine, 3TMS derivative	8616867	8379464	4362696	7985263	158267692	105599881	187173347	102281816	63219340	74265115	63074460	356600805	1067298750	1034803861	1048775443	901664869
*Benzenamine, N-ethyl-	252673415	228313673		242125119			40319045		250367902	268414541	246442802	227155973		249225709	260903699		38351902	0.169254
*4-Methyl-1,2-bis(trimethylsilyloxy)pentane	179530516	178584851	137363994	187063443	178200608		179636508	82411273	193642028	214108895	202550472	196647892	190046609	232260242	219842434	154101606	168448771	0.926904
Glutamine (4TMS)_M000032_A174008-101-x1[NA]_NA_1720,58_TRUE_VAR5_ALK	143332807	200999001		104511750	353867975	551408040	604811522	309268908	1825611067	2185906536	2096622914	1094025572	2000336034	2126682953	2752398081	2430173027
*Maltotriose (1MEOX) (11TMS) MP_M000269_A355003-101-xxx_NA_3507,56_TRUE_3630,78_MOSYS_PRED_VAR5_ALK															25129130
*Hexasiloxane, tetradecamethyl-	670789552	732514414	579048861	839151120	889534734	861068304	1295047791	733591632	597066957	1823983918	607328270	1118747555	1607126304	672796596	1587674041	1290874249
Glutamine [-H2O] (3TMS) MP_M000032_A160005-101-x1[NA]_NA_1580,83_TRUE_VAR5_ALK						45416688			228196285	141980342	482565454	236396833	182485959	274747948	444522828	253704440
*Unknown#sst-cgl-008_M000000_A124007-101-x1[NA]_NA_1238,44_PRED_VAR5_ALK	12640487276	4068543789	13596657098	13654363279	11580131357	14788085642	11084397786	8915328999	6694098754	8158269034	7130224782	7659153829	273599805	6915648604	6715346248	6789749007	67024110	0.00762374
Dodecane, 4,6-dimethyl-	538490245	409714861	262110176	434305828	490033160	458051423	453579464	85047220	347301884	307386200	347817603	331949242	314577779	374963652	457785921	250623762	479679480	1.30887
*Lumichrome (2MEOX)_M000872_A133011-101-x1[NA]_NA_1332,56_TRUE_VAR5_ALK	419636573	362683468	241129971	372745656	444843626	968117604	363899874	191171492	312233051	379682887	279888890	359336289	553770530	556996972	528583432	463269571
*Ethanol, 2-butoxy-, phosphate (3:1)	573998200	739124593	612128753	650552090	776368892	70179378	65991003		902486045	941984583	842481233	917580693	874674454	1052368784	1013379593	849580103	29248607	0.0403137
*Adenosine, 4TMS derivative	6038876092	5985980283	4535048013	4950372852	6659148709	6194714323	6328953622	3948751752	6958635482	6857253164	6292538840	7164767718	12138906968	11031059517	11635610368	11233405768	21481151	0.00291383
*Nonane, 2,6-dimethyl-	37044377			91329520	137947667	136399006	102382233			91012722	76117703		83676706	82770968	99409272		108725730	1.15901
Pyruvic acid (1MEOX) (1TMS)_M000071_A104002-101-xxx_NA_1037,28_TRUE_1065,40_MOSYS_TRUE_VAR5_ALK	767345453	690809978		1021919298			870717387		725079840	873733807	625469647	717444027		470427330	812772616
*2-Ethylhexanal ethylene glycol acetal	2065949294	3127104561	3364562269	2094212669	6591533834	9205552934	4993880615	4889900202	6195081305	6575451861	5596187701	5121177774	9977499074	9757836565	10299805670	10190956404	10838428	0.00173334
*Glyceric acid-3-phosphate (4TMS)_M000105_A181003-101-x1[NA]_NA_1791,68_TRUE_VAR5_ALK	77069890	77841770	211076327	179770660	236284118	120348999	187960328	61611879	100678696	224135126	145171782	163525227	438285114	178343051	232151389	314231841
*Pyridine, 2-hydroxy- (1TMS)_M000413_A105003-101-xxx_NA_1031,31_TRUE_1031,17_MOSYS_PRED_VAR5_ALK	332244337	267638405		246469591	393053982		321134999		456813821	656491473	413104628	420462029		641701394	645852467		105720968	0.242532
Decane, 2,2-dimethyl-	557146408	489347101		476140622	743976686		748332556			545908316	585954058	590976409	498290382	553539205	526201093		529391193	0.92202
*L-Cysteine, 3TMS derivative				158723049	121283420	50811940	172318774	56698286	131434422		140679004	158006537	242603114	332990861	337402508	240527673
*d-Proline, n-propoxycarbonyl-, hexadecyl ester														18371455	17898791
*Methyltris(trimethylsiloxy)silane	149613314	130163558	113285335	132577934	194307778	182090223	200423763		134257731	167721008	170711598	145003029	348573356	171212929	194615020		88976238	0.511661
*NA_M000000_A148003-101-xxx_NA_1464,64_PRED_1486,09_MOSYS_PRED_VAR5_ALK		528887276	590499444	540317668	584620479				923681948	1754449061	527263167	1417819731	1367955201		2121577838	1325351321
*3,7-dioxa-2,8-disilanonane, 2,2,8,8-tetramethyl-5,5-bis[[(trimethylsilyl)oxy]methyl]-	9266458674	8238758670	9084955646	8382816126	10127180321	9821947042	8764065093	5915639712	8179102560	7861752170	8092220490	8315962668	9805826245	9856795798	9719879273	8296920745	8995717976	1.03007
*L-Methionine, 2TMS derivative	788057178	878190346	760648155	569829233	1116790164	1666045605	1145859518	606979513	1584656891	1444713009	1587254482	1389651876	3465114856	3222757078	3400170631	3483325001
*Tryptophan, 3TMS derivative		355721721	244528376			488967580	505605928	297343473		780959643	831186352		2519408708	2650141006	2619395267	2383277650
*Oxalic acid, 2TMS derivative		225697830		230228853	3242990290		175217792		237389017	281793747	279381025	261856382	202008654	295614598	301882872	238848393	124819351	0.250771
*Butylated Hydroxytoluene, TMS derivative	1575431731	1485862824	1292685318	1452989955	1629542366	142829106	110435482	74886052	1844288497	2033463412		1609382058	1970869822	1991971911	2202478222	1773212306	126660177	0.089659
*L-Ornithine, 4TMS derivative	3325516816	3443366672	2991422751	2706239065	2753381584	3052397126	3265202257	1915580634	4226489591	4050192499	4315246231	3944434991	5190228726	5370261204	5304117740	4813391511
*Thymidine-5'-monophosphoric-acid_3TMS_M000000_A282014-101-x1[NA]_NA_2816,53_PRED_VAR5_ALK	105035774	97017869	69386654	88585447	84917082	110500037	102964503	57879148	92076882	107103130	90216816	117361318	277056579	230498836	263694776	243250946
*Glycolic acid, 2TMS derivative	208644724	176322790		182827589			179614757	31017443	216525850	246398963	204993458	182782002	48807191	222492032	227499631		141262836	0.796622
Dodecane, 4,6-dimethyl-	538490245	409714861	262110176	434305828	490033160	458051423	453579464	85047220	347301884	307386200	347817603	331949242	314577779	374963652	457785921	250623762	479679480	1.30887
Methionine (1TMS)_M000018_A142007-101-x1[L-]_NA_1416,46_TRUE_VAR5_ALK	19116712								52553523	55421991	97430271	71483588		227253577	262160056
*D155405_M000000_A155014-101-xxx_NA_1554,13_TRUE_1580,04_MOSYS_PRED_VAR5_ALK	41237133	68004042			31821779		42303186	36474238	107533313	66351499	107295695	140409995	462642168	326400954	393759054	324386363
*Mannose (1MEOX) (5TMS) MP_M000633_A188002-101-xxx_NA_1868,46_TRUE_1910,03_MOSYS_PRED_VAR5_ALK	253031282			267181217							233925709		1016427239	1035358595	824332444	675051203
L-Glutamic acid, bis(trimethylsilyl) ester	608397938	182320425	109244489	289975393			759305630	95907116	1664320893	1905391183	2026841384	1938839888	789720094	3411522179	3564625872	692629307
*Myristic acid, TMS derivative	485122946	401498606	378188803	491082472	254174973	400048011	223679080	168464433	515527312	348060708	275917556	284794900	450199865	381668517	403009606	394200016	265364028	0.725083
*1,3-Dihydroxyaceton (1MEOX) (2TMS) MP_M000438_A124003-101-xxx_NA_1242,06_TRUE_1252,42_MOSYS_PRED_VAR5_ALK															123266936
*Nonanoic acid, TMS derivative	449081072	363579765	170989961	347293883	227635782	218314544	412359132	194685902	418893004	420596605	398544660	386453573	309287395	546912718	679276187	504683603	327705411	0.866861
*2-(Methylmercapto)benzothiazole	81172882	76677357	51691757	54272602	117876951					89640321	129836800	197188360	334341428	351727128	368030053
*Ribulose-5-phosphate (1MEOX) (5TMS) BP_M000769_A211015-101-x1[NA]_NA_2087,72_TRUE_VAR5_ALK	305297292	242479940	175397164	245586389	220583465	288976416	321346592	118771399	257727868	179285721	273708306	201640932	581824120	1063003091	670888449	367941512
*Glyceryl-glycoside TMS ether	63246616	60580553	38641052	44281639	15481926	33264049	54703337	37877328	60856981	45256117	50838857	60685322	139841673	143462230	135721756	142478922
*1-(2-(3-Cyclohexenyl)ethyl)silatrane	16983209	17441650	13252667	15862759	21549574				24159936	25887266	16609101				6554694
*Methylal	525016391	74294346	352876017	485992059	676190211		591414049	237142274	915859377	776348660	771445125	752558021	1310228071	1459111943	1432161266	3049065408	48150325	0.0538606
L-Lysine, 3TMS derivative	335298738	141730763	53793252				272990910		378501726	442324343	468710231	339101556	407978039	869620202	890637746	128650454
*Isovaleric acid, 2-oxo- (1MEOX) (1TMS) BP_M000449_A121003-101-x1[NA]_NA_1121,66_TRUE_VAR5_ALK	884944137	232020849		257697283			558050824		438128178	500227900	296348859	356069596		349084708	475448937	432612852
*Pentanedioic acid, 2-(methoxyimino)-, bis(trimethylsilyl) ester	1438889183	1194564658	578910144	1153703304	2499609264	1144197568	2045165389	858043171	3352932937	3689276638	2253998729	2645552884	2963622980	2349789757	3367066089	2937384420
*Glucose-6-phosphate (1MEOX) (6TMS) BP_M000513_A235002-101-xxx_NA_2328,97_TRUE_2393,48_MOSYS_PRED_VAR5_ALK	1436765528	1366072050	658143552	1591393747	856065024	1052018608	812477841	397551578	641121520	570516428	687084683	932693116	4372002932	4633245284	4322614900	3195051285
*Propanoic acid, 2-amino-2-methyl-3-hydroxy- (3TMS)_M000893_A137008-101-x1[NA]_NA_1375,1_TRUE_VAR5_ALK								16994844	70732523	49137686	59818843	48108516		215776202	240132316	198323696
*Unknown#sst-cgl-004_M000000_A119012-101-x1[NA]_NA_1182,47_PRED_VAR5_ALK				57052858					93419358	125771189	95516944	99965447	172379470	177175894	171587825	159483917
*Diethylene glycol, 2TMS derivative	16330572850	13858241682	21935426366	13612652733	23576388589	7234464905	5218146821	3041172173	13933830925	13295415600	13366242838		19808820224	13970121269	15746704231	12361890607	5150689566	0.372716
Proline (1TMS)_M000029_A117006-101-x1[L-]_NA_1176,03_TRUE_VAR5_ALK	5287351981	2898942094		3594009567	1813019532		6941551857	117063405		8319646031	9956758747	11501041027	6444998917	11219000835	11028726969
*Nicotinamide (1TMS)_M000271_A150004-101-x1[NA]_NA_1489,26_TRUE_VAR5_ALK	2131365038	2249089255	2061029377	2744488895	2064158038	1661827999	2289864871	1221534935	2010448411	2121988497	1571530900	1728305672	2237530780	2263215768	2351358828	2109980008
*Valylvaline, N,N'dimethyl-N'-ethoxycarbonyl-, undecyl ester													29073069	31613364	34719467
Raffinose (11TMS)_M000049_A337002-101-xxx_NA_3350,64_TRUE_3494,90_MOSYS_TRUE_VAR5_ALK											52595342				62200527
*Butanedioic acid, 2TMS derivative	5870009833	5928466642	4405846835	5146858722	7263682266	7092250270	6570296219	4362759188		6976790430	6527432626	7369631410	11520102108	10203289193	10326772759	9882822698	152182012	0.0208569
L-Lysine, 4TMS derivative	4102607606	4285759991	3629082723	3111110525	3925198690	4181602154	4310920638	2692870579	4938107762	4840965969	5036116292	4810209020	6545961540	6874716421	6685626078	6246805227	11364876	0.00238577
*D-Limonene	17273622						11993397								10803143
*NA_M000000_A214003-101-xxx_NA_2127,28_PRED_2181,74_MOSYS_PRED_VAR5_ALK		170835292		137602365	81874260	69413021		26852929	129249876		88931223		617692016	780117538	635388517	373625278
*NA_M000000_A304001-101-xxx_NA_3022,95_PRED_3122,03_MOSYS_PRED_VAR5_ALK		14454165125	13212882964	14258293679	14505335109	14139402495	14059971866	11690988077	3033500402	13976379139	13542342798	13400168710	13226931109	13148835653	12294590156	13107619759	15213435181	1.18823
Inosine-5'-monophosphate (5TMS)_M001129_A298003-101-xxx_NA_2984,72_TRUE_3081,90_MOSYS_PRED_VAR5_ALK															44589707
2-Butenedioic acid, (Z)-, 2TMS derivative	607528968	438711996	728592846	465227056	1364675852	1340384068	653858086	250574831	890178158	965362333	520608141	539418101	2480544137	1368138554	1275520207	1446912047	171817079	0.179253
1,3-Dioxolane			13380284303	14752298255	17528772969	16360484662	16711838909		13751312733	19882940936	18906277612	16930296613	13970105833	13887238098	15340607208		15762792803	0.98825
1-(Palmitoyloxy)-3-((trimethylsilyl)oxy)propan-2-yl (Z)-hexadec-9-enoate															46243680
Muramic acid, N-acetyl- (1MEOX) (4TMS) MP_M001064_A227006-101-x1[NA]_NA_2276,07_TRUE_VAR5_ALK							155857171			140631307	92737918	205623019	903142660		884440166	823636254
Lactobionic acid (TMS) MP_M001097_A279009-101-xxx_NA_2798,1_TRUE_2885,98_MOSYS_PRED_VAR5_ALK															45789666
Ethylene glycol, 2TMS derivative	3607920546	2686407416		3008623367	3342631378	1791550835	3304418467		2069805417	2702325830	2410874802	2818820997	3009177569	2836976753	3165555855		3236912598	1.14487
Butanoic acid, 4-methylthio-2-oxo- (1MEOX) (1TMS) MP_M000923_A145013-101-x1[NA]_NA_1454,41_TRUE_VAR5_ALK	249397507	219505531	132187515	266079672	403975565	335320104		198364295	704279333	1001679762	569938865	681802239	1114216574	814811175	973774178	709548133
Tridecane	118398013														89690807		97747053	0.939474
Cyclononasiloxane, octadecamethyl-	32068280	49316207	31434079	28339871		24808355	29414794	31694856	41600880	33493537	51326765	29554150	30714206	35664388	30731523	30029856	66546506	1.95651
3-Carene	112170289	79686354		77002221	161828116		105059215		70847441	91615038		73115659	86843457	83847950	107902871		92977168	0.974122
2,2-Dimethylpropane-1,3-diol, O,O'-bis(trimethylsilyl)-	22729192	25756496		19765138			28750023		14455596	25860488	22975302	20270336		17512547	27515655		21592647	0.95716
L-Glutamic acid, 3TMS derivative	4519148827	4552311982	3744111927	3961176199	7606279680	8266565205	6642247347	4375131114	8541749084	8735899095	8233076889	8477965592	5475569178	3131897874	2891867068		45211647	0.00760669
L-Proline, N-(3-methoxybenzoyl)-, undecyl ester			5093325		5297975		9773055	3503677							4574583		4406411	0.7801
1,3-Dioxolane			13380284303	14752298255	17528772969	16360484662	16711838909		13751312733	19882940936	18906277612	16930296613	13970105833	13887238098	15340607208		15762792803	0.98825
1,3-Propanediol, 2TMS derivative	110210044	94841715		93528427	125305626		269560835		89534597	110621614	105957303	94714444		98296500	110500801		228789157	1.93134
Phosphoric acid, bis(trimethylsilyl) 2,3-bis[(trimethylsilyl)oxy]propyl ester	192739772	407738758	314256482	310063068	139984435	251645859		182219329	129833809	119411977	160485935	178336729	526075626	513764358	582524456	458949354
Phenylpyruvic acid (1MEOX) (1TMS) MP_M000572_A160002-101-x1[NA]_NA_1591,01_TRUE_VAR5_ALK	812001952	816442071	583370814	925156760	624386089	334666885	694316898		832511584	1080668772	822170770	728746325	1209435652		1121781295	1068665333
Hexanoic acid, TMS derivative	256615840	208429374		210170998			270321393		283296184	390078391	305938061	322321104		298468812	389577026		228586173	0.778771
Ethyl pipecolinate	37579264						53674675		64025362	53956981	91276736	103384778	133627923	261970767	158926403	69515670
Etoxeridine	4517645618		3742938186			8263796195		4373554800	8538398096	8732300991	8229921937	8474595443	1830205864	1704225574	1863630698	945845966
Boric acid, 3TMS derivative		9246027868	9876001150	10022021393	13633656697	11879029302	12266993760		10163072574	13400128352	12906735708	11304883176	9318469766	8111844776	9133404331		10597127637	0.975226
Glyceraldehyde (1MEOX) (2TMS) BP_M000452_A123004-101-x1[S-]_NA_1194,03_TRUE_VAR5_ALK															78171454
Unknown#bth-pae-059_M000000_A107001-101-x1[NA]_NA_1060,6_PRED_VAR5_ALK										26820796		20420387	226279592	57562320	59578953	38682965
Phosphoric acid (3TMS)_M000075_A129001-101-xxx_NA_1262,42_TRUE_1273,79_MOSYS_PRED_VAR5_ALK	8973879098	9040080903	8858065336	9259418611	8709358892			7415445011	7986529540	9375650066	8578091848	9922602825	10813479825	14864615044	14005869740	12161979936
Hexanedioic acid, bis(2-ethylhexyl) ester	1484129339	1540199708	1443326984	1506104496	1624222508				1560315677	1557569449	1422728311	1406584934	1525849672	1452192157	1521390404	1494761217
Uridine (4TMS)_M000273_A246006-101-xxx_NA_2455,91_TRUE_2526,74_MOSYS_PRED_VAR5_ALK	2359665254	2394404246	1636840320	2042670238	2802876314	3028492485	3107975578	1494444526	2893016395	3109484206	3053229110	3065456946	5916021447	5748030157	6052428858	5253428193
Unknown#sst-cgl-122_M000000_A266012-101-xxx_NA_2659,18_PRED_2740,14_MOSYS_PRED_VAR5_ALK															21870054
Propylene glycol, 2TMS derivative	31810597	30669140		32486593		29865626	38912359		23473091	43551866	33997906	33732626		27443342	45303401
Carbodiimide (2TMS)_M000836_A100005-101-xxx_NA_953,17_PRED_949,14_MOSYS_PRED_VAR5_ALK	17329474	14606029	25102990	13607057	29473351	30531301	17764089	10589690	16643655	26576219		15779028	36569655	44699605	30437309	32205642
Propane, 2-methyl-1-nitro-															57646771
Pentadecane	154749271	102719549	88052235	227177879	151914023	187490878			215650671	147169813	176422595	150984497	165021013	158732342	215522572	151881425	106844051	0.652201
Cadaverine, 4TMS derivative	5071337561	4759668008	3871507520	5341870725	7543480459	6991826512	6451442486	4341619302	4458711278	5934797164	3322970144	4810360578	7336736191	6056459326	6813781744	6375415101
N-Acetyl-D-galactosamine, (isomer 2), 4TMS derivative	32839589	29047984	26183482	27589163	89518848		67363857		67055619	37191096	5929328	37846280	367175818	348727505	303276619	289704505
2,4-Dimethyldodecane	225376243	184291635	165908609	60535512	195394798	214599446	197772244		156110928	185785181	174805890	173465524	168874430	179350860	231312758	131385778	186931573	1.06012
(Z)-Docos-9-enenitrile	188358819	106684061	215555141	212439863	241128276	312417662	70876851		123322435	124660436	130639440		133126580	83839589	76411205	89947238	459063812	3.04678
Azulene															14301698
Vinyl ether														903593283	888411342
2-Ethylhexanal ethylene glycol acetal	2065949294	3127104561	3364562269	2094212669	6591533834	9205552934	4993880615	4889900202	6195081305	6575451861	5596187701	5121177774	9977499074	9757836565	10299805670	10190956404	10838428	0.00173334
Tridecane, 2-methyl-	449539409	328338717	308141519	389648520	334080695	431616525	330823582	120962175	315921844	356100918	315237463	298117780	310296006	313287676	354569311	318450275	331269468	1.00477
2-Ethylhexanal ethylene glycol acetal	2065949294	3127104561	3364562269	2094212669	6591533834	9205552934	4993880615	4889900202	6195081305	6575451861	5596187701	5121177774	9977499074	9757836565	10299805670	10190956404	10838428	0.00173334
2-Methyl-1,3-propanediol, 2TMS derivative	38405567				44888835		42831540			52521568	44271689		51881315	45059608	54099277	48513533
1-(2-(3-Cyclohexenyl)ethyl)silatrane															6554694
Heptasiloxane, hexadecamethyl-	18025784	17623076	13570828	15446839	19666498	21582799	17130661	10809536	18693349	17717562	20728975	16080603	20846460	20383760	19750523	21348772	18389383	1.01667
Tridecane	118398013														89690807		97747053	0.939474
Diethylene glycol, isobutyl ether, trimethylsilyl ether	317450680	282054994	289359451	290370463	373850386		230942271	111259239		382267312		286507676	397093950	260607753	357362428	278678580	100744484	0.339488
1,2-Benzenedicarboxylic acid, bis(2-ethylhexyl) ester	23675594		21306417	24570594											28292984		16311167	0.666813
1,3-Dioxolane			13380284303	14752298255	17528772969	16360484662	16711838909		13751312733	19882940936	18906277612	16930296613	13970105833	13887238098	15340607208		15762792803	0.98825
Methoxyamine, TMS derivative	1240677322	544789969		812695089			672431486		944307101	974535880	999437122	1058037992		759828507	941664917		315921984	0.353048
Fructose-1,6-diphosphate (1MEOX) (7TMS) BP_M000511_A272001-101-xxx_NA_2714,26_PRED_2797,96_MOSYS_PRED_VAR5_ALK														121844493	71861063
L-Isoleucine, 2TMS derivative	368043552	557566461	477892839	325301990	979097777	919917040	801221527	698829746	1822550866	2193051052			3492923047	4696755864	4912111802	4779121860
Ornithine-1,5-lactam (2TMS)_M000728_A147003-101-x1[NA]_NA_1454,09_PRED_VAR5_ALK	55164594	53804125	46123746		44924863	44193540		35753973	38917186	39414132	62091446	29512323	66720183	63291364	71365356	63382013
Dodecanol_1TMS_M000000_A157019-101-x1[NA]_NA_1564,92_PRED_VAR5_ALK	66906374	54036895	48949553	62159815	50662425	50685356	52975676	24568279	65461014	59790670	66385991	58916400	64612802	67226470	77986279	57861514	63016440	1.0851
Glucose, 5TMS derivative													28754642		27317602
Decane, 2,3,5,8-tetramethyl-	329578356	295423039	243720335	295140654	271670046	258023659	268012204	158207020	276323458	263543258	243861220	244120238	227856348	246589093	264690910	264548763	337124243	1.29935
Nonane, 5-methyl-5-propyl-								181921778							37847552
Decane, 2,9-dimethyl-															12990231
Dodecane, 6-methyl-				76466373		87654211									72741281		80729259	1.02249
Methylal		74294346								776348660			1310228071		1432161266	3049065408
Unknown#bth-pae-008_M000000_A103003-101-xxx_NA_1019,45_PRED_1018,72_MOSYS_PRED_VAR5_ALK								24590160							14023801	14282988
3-Ethyl-3-methylheptane															10541254
Adenosine (3TMS) (Derivate not found)_M000287_A261002-101-x1[NA]_NA_2612,19_PRED_VAR5_ALK	293386432	353968664	198381583	291595173	217125698	314097246	280417970		444469109	517826343	544644468	1170541061	1568592054		1508967713	3151680037
Cyclotetrasiloxane, octamethyl-	34389599	27815650		27825036	29880279	29778352	30229426		24079968		36461018	27769081	29575798	33313504	32613888		24724013	0.815679
Valine, N-methyl-N-methoxycarbonyl-, octyl ester	21705062	23678100	20278772	19604252	27068059	25778503	28595166	14907720	38504885	47583456	38627008	41146162	89761065	98547976	111801510	74592327
L-Methionine Sulfoxide, N,N-bis(triimethylsilyl)-, trimethylsilyl ester									159145040	95826233		88622127	156153598	353914286	204329738	209799858
Diamide	1699925999	921543113		1255291453			1841580651		4981049398	5892467602	5795678315	5831162032		10848647820	11106562004	52293887
Putrescine (4TMS)_M000186_A175002-101-xxx_NA_1734,98_TRUE_1754,00_MOSYS_TRUE_VAR5_ALK	4923019992	4395233414	3335370681	4974008125	6713567265	5913909232	5515360694	3193512670	5428725727	6584054345	4147813927	4870234143	6196670580	4831383897	5470222555	5263533502
Cyclopentasiloxane, decamethyl-			10492556		9083282		11498285	5378022	6236453		8536271	11952328	9376480	8317844	13961213	12958073
D260482_M000000_A260006-101-xxx_NA_2604,01_TRUE_2682,22_MOSYS_PRED_VAR5_ALK	531083400	551330609	520457684	541454014	610294039	53477911	42337057	20379176	568701966	577312129	547388109	524952566	644142025	604647602	641678078	621879211	31366699	0.066022
Unknown#bth-pae-008_M000000_A103003-101-xxx_NA_1019,45_PRED_1018,72_MOSYS_PRED_VAR5_ALK								24590160							14023801	14282988
2-Pyrrolidinone, 1-methyl-															7721154
Heneicosane, n-_M000548_A210012-101-x1[n-]_NA_2102,8_PRED_VAR5_ALK	127711004	100355992		110935562		92361798			69090208	68935986	116194621			120840367	126130422	104270288	89814363	0.866243
Tetracosamethyl-cyclododecasiloxane															8036585
Ethanolamine, 2TMS derivative								24590160							9195443
4-Hydroxybutanoic acid, 2TMS derivative	116846822	94884481		88179350			93042271			113985313	92692435	99983479		203187981	212748403	217334608
Hexadecane	460145390	352747734	262744500	632585802	360415748	586428250	292431048	136973185	595378665	349251534	478812625	392452880	365517116	335396820	504572241	367001421	478971122	1.18395
Glycine, di-TMS									225968583	248850808	176699158	209854936		438831623	417235593
2-Bromo dodecane						44444645									62174865		46963113	0.880948
1-(2-(3-Cyclohexenyl)ethyl)silatrane															6554694
Disiloxane, hexamethyl-	33636175	32723384	23962840			20107771	44986579	17033358	56261435		61474946	49443214	267140192	226547433	297083430	134834253
1,2-Benzisothiazole															12321398
1-Octylsilatrane															15850384
Homocysteine (3TMS)_M000021_A167001-101-x1[NA]_NA_1662,83_TRUE_VAR5_ALK	76238113	65341072	46221081	73146987	61782231	66255277	50695413		78120448	76931474	53306953	60424725	143473088	166174481	164597464	171734460
Heptadecane, 2,6,10,15-tetramethyl-	545492553	396751685	404996787	460823559	467142974	558763078	485013472	212251961	431016635	456273917	440062100	433084640	420605907	464973210	511892820	461636840	441730307	0.988379
Undecane, 3,7-dimethyl-	458364120	360531607	285100793	394131533	352293355	406886028	353559236	162318080	319925821	350511565	317265476	309471503	320402944	364099048	417329827	329377467	351222593	1.02145
Tridecane	118398013														89690807		97747053	0.939474
Phosphoric acid, bis(trimethylsilyl)monomethyl ester	232899959	200264400	94651496	223828747	161697319		232626495	100853979	164019295	204539368	160448114	169526125	227914912	225635088	250573237	184810901	18686499	0.0988952
Alanine [+CO2] (2TMS)_M000000_A142001-101-x1[DL-]_NA_1395,2_PRED_VAR5_ALK				91789285					204351573	157670834	153383630	175520041		213381595	228559318
DL-Phenylalanine, TMS derivative	27921896			14480268					50642791		74383677	81884066		156510135	190424376	28310688
Benzenepropanoic acid, α-(methoxyimino)-4-[(trimethylsilyl)oxy]-, trimethylsilyl ester	744445513	716092699	454600835	802494110	759775669	504472928	671627487	301229847	1068627921	1473983846	783035602	944659418	1913452021	1575269527	1657094729	1424074954
Ornithine, N2-acetyl- (4TMS)_M000409_A189020-101-xxx_NA_1965,41_TRUE_2011,81_MOSYS_PRED_VAR5_ALK									20072996	28227412	26525203	19866680	65815559	58776108	76113683	64681850
Siloxane_M000870_A225011-101-xxx_NA_2256,43_PRED_2317,32_MOSYS_PRED_VAR5_ALK															11634616
Hexadecyl octyl ether															38745423
Heneicosane, n-_M000548_A210012-101-x1[n-]_NA_2102,8_PRED_VAR5_ALK	127711004	100355992		110935562		92361798			69090208	68935986	116194621			120840367	126130422	104270288	89814363	0.866243
Succinic semialdehyde (1MEOX) (1TMS) BP_M000397_A118003-101-x1[NA]_NA_1182,03_TRUE_VAR5_ALK	49401180	153648747		41370757			51263730	96331976	105861946	36620432	28516585	43553335	58242067	51811741	83895549
Fructose-1,6-diphosphate (1MEOX) (7TMS) MP_M000511_A272002-101-xxx_NA_2708,96_PRED_2792,40_MOSYS_PRED_VAR5_ALK													185759803	168642042	191270000
Phenol, 2-methoxy-5-[(1,2,3,4-tetrahydro-6,7-dimethoxy-2-methyl-1-isoquinolinyl)methyl]-, (S)-	2652131573	1806143802	6838705720	1500451046	12706017654	13152177797	8688741014	6350257150	7691489225	8093987418	7358881212	7017595332	10033996390	1607017124	1640886559	7324793047	6837662871	1.04728
Benzenecarbothioic acid, 2,4,6-triethyl-, S-(2-phenylethyl) ester														191074427	60891853	6647728
Alanyl-alanine (2TMS)_M000937_A160013-101-x1[L-, L-]_NA_1600,7_TRUE_VAR5_ALK	180108163	184334549		147289316	701734189	588404155	627891973	282956968	467334574	528200206	394984270	814139866	3929346125	3397829526	3947121190	3192667909
NA168015 (classified unknown)_M000000_A168015-101-xxx_NA_1679,79_TRUE_1711,96_MOSYS_PRED_VAR5_ALK	474979812	480097075	394593651	436742017	377831439	402514279	307554251	245453256	160575858	159311020	185760368	218955031			469422419	404625143
5'-Methylthioadenosine, 3TMS derivative	1018459447	1012123320	798433184	968309411	1093454088	1237297627	1012855282	630420215	881154246	925456632	707580229	695895197	1476449348	1263512082	1301820616	739347131
1-(2-(3-Cyclohexenyl)ethyl)silatrane															6554694
Silanol, trimethyl-, phosphate (3:1)	11486414528	11725544340	14512888638	12130687245	11649243156	13619258605	12376982447	9101774979	9668833813	12119963252	10752199085	12864028631	16894544933	5118769125	19854296218	16842840374	3783607905	0.301605
NA_M000000_A354003-101-xxx_NA_3535,28_PRED_3659,88_MOSYS_PRED_VAR5_ALK														40811561	41852198	37358197
Glycine (3TMS)_M000031_A133001-101-xxx_NA_1302,5_TRUE_1317,50_MOSYS_TRUE_VAR5_ALK	2209671061	4089697391	1904680738	1688323200	1759093460	1601916458	1831890505	1050473659	2360339960	2353206380	2116018990	2386885936	3673613297	3150307910	3138286379	5815708630
D164543_M000000_A164017-101-xxx_NA_1645,42_TRUE_1675,87_MOSYS_PRED_VAR5_ALK													279600437	266338810	301598219	275261681
Cycloheptasiloxane, tetradecamethyl-	13215667	16696153	18319653	18990038	26593886		40115486	20418839	12283229	62948394	14266053	33802152	44411952	12245462	47089398	39929314
Siloxane_M000870_A259009-101-xxx_NA_2596,74_PRED_2674,59_MOSYS_PRED_VAR5_ALK	1356102304	1602483820	1513059209	1818649775	2155341739	1811125171	2234992229	1175027241	1148540693	3545860126	1366184015	2516887443	3013868363		2983538199	3024206544	228220807	0.10949
3-Trimethylsiloxyvaleric acid, trimethylsilyl ester															35733207
Citric acid, 4TMS derivative	6348258639	6080184239	4809211502	6079408786	4134365233	4124867178	4688403920	2867231472	2031329878	2150519632	1365974216	1508524166	2336032100	1679774811	1883012463	2046555026	63478207	0.0187619
Dodecane, 4,6-dimethyl-	538490245	409714861	262110176	434305828	490033160	458051423	453579464	85047220	347301884	307386200	347817603	331949242	314577779	374963652	457785921	250623762	479679480	1.30887
Hypoxanthine (2TMS)_M000294_A182006-101-x1[NA]_NA_1808,98_TRUE_VAR5_ALK	161326529	118270775	63786230		146842686	116150842		77381457	274972300	221268480	160430065			292809123	311975379	312944689
N,N-Diethylheptylamine			313488128				9413962			7852810					1341014668	9063606
Siloxane_M000870_A183010-101-xxx_NA_1828,56_PRED_1868,14_MOSYS_PRED_VAR5_ALK					79411573	80784630	74562256			153931086		106238842	117907508		105041566	136259370
D278931_M000000_A278013-101-xxx_NA_2788,69_TRUE_2876,10_MOSYS_PRED_VAR5_ALK	575540417	650394252	550812722	621307832	721757593	63267989	70738507	112286601	758888954	922870910	1020784478	1083065829	781770707	914318502	774740441	291049974	40106346	0.0647294
Sucrose, 8TMS derivative	5237879205	5342624141			6294065154	6093392740	5649810795	4301075272	6519592677		6311345839	1597325492	2048652408	8145594491	2056493120	2213586481
D-Fructose, 1,3,4,5,6-pentakis-O-(trimethylsilyl)-, O-methyloxime													45436403	73624941	53689421
Pipecolic acid, N-ethoxycarbonyl-, dodecyl ester	54702627	55894998	40464892	41358335	77730445	71769142	52553441		63730215	83562000	36435564	33276926	126642990	110339202	92412803	113289073
Pyrene, 1,9-dimethyl-		14337251	3499475			17508479	4941523	8036485							26286171
Undecane, 4,7-dimethyl-		53986683	35633903	54308143	61309539	54319661				58025203			60259241	82312139	92079939		52698982	0.858858
{[2-(Trichloromethyl)-1,3-dioxane-5,5-diyl]bis(methanediyloxy)}bis(trimethylsilane)	351874139	320376451	231819922	307229050	382030117	404639539	409327990	187136714	309867163	353519873	293705927	284742063	403566671	372265648	368013773	275147720	270860662	0.824653
d-Proline, N-methoxycarbonyl-, pentyl ester	4904176	5186252	3424524	4632356	5388672	3248348	5180947	3225617	7949628	8213279	6325305	6730496	12357043		15500307		1719953	0.260975
Xylobiose, D- (1MEOX) (6TMS) BP2_M000720_A242004-101-xxx_NA_2422,7_PRED_2491,88_MOSYS_PRED_VAR5_ALK						1167943776	577634725		858139777	788779010	786444486	1139980102		4169532795	4031943512	3881776030
NA_M000000_A239003-101-xxx_NA_2384,42_PRED_2451,69_MOSYS_PRED_VAR5_ALK									795363070				1732121430		2126730043
Siloxane_M000870_A225011-101-xxx_NA_2256,43_PRED_2317,32_MOSYS_PRED_VAR5_ALK															11634616
Diethanolamine, 3TMS derivative	74476582	66072245	61739779	80506575	49443397	143957244		53836284	71624019	70205132	51393515	51641560	89784285	63807457	71967833	83072073	40131873	0.555572
1,3-Dioxolane			13380284303	14752298255	17528772969	16360484662	16711838909		13751312733	19882940936	18906277612	16930296613	13970105833	13887238098	15340607208		15762792803	0.98825
Cyclooctasiloxane, hexadecamethyl-		38588792		70430963		13945637		30994313		26178571	41290194	23612839	26081769	35184224	24869587	25322678	170067628	5.24753
Siloxane_M000870_A271010-101-xxx_NA_2716,61_PRED_2800,43_MOSYS_PRED_VAR5_ALK	1390536470	1541983079	1898631106	1846191159	2056886208	1943287456	3236493979	1965434543	978972799	3032779113	2012528058	2309100281	1242646911	252461553	1581657724	1531070887	654214062	0.363192
Mannose-6-phosphate (1MEOX) (6TMS) BP_M000711_A233001-101-x1[D-]_NA_2313,44_TRUE_VAR5_ALK															241927561
Allantoin (4TMS)_M000092_A189007-101-xxx_NA_1876,44_PRED_1918,40_MOSYS_PRED_VAR5_ALK	233435606	228646936	171693956	228402516	260245601	259124838	258035120	107037785	279040087	326559188	197653117	199920631	523936977	379712007	422913349	418173148
Fructose-6-phosphate (1MEOX) (6TMS) MP_M000510_A232002-101-xxx_NA_2292,48_TRUE_2355,17_MOSYS_PRED_VAR5_ALK														317387948	165470023
1H-Pyrrole-2,5-dicarbonitrile		42125702	30933223	42287626			41302127	20756879	17269930	71079391		15076189	22315573		43943763	40463173	29410951	0.834776
Fructose-1-phosphate (1MEOX) (6TMS) MP_M000509_A230003-101-x1[NA]_NA_2282,83_TRUE_VAR5_ALK	128328923												197166799		142157632	82983338
Benzyl alcohol, TMS derivative		77886757		68113461			99740771	44847899	63888009	187437491		168887115	234244670	78527869	210529409	135528397	23755537	0.190789
Benzene, 1,1'-(1,1,2,2,3,3-hexafluoro-1,3-propanediyl)bis[2,3,4,5,6-pentafluoro-				5425406								4512512			7602815
Methane, trimethoxy-	274343700											470156127			284898797
1,3,5-Trisiloxane, 1,1,3,3,5,5-hexamethyl-1,5-di(tert.butyl)-		9246027868	9876001150			11879029302	2110921272	3109750013	10163072574	2413567688	5752633830		9318469766		1396118281	6565163099
Butane, 1-isothiocyanato-															20482562
Bisphenol A monomethyl ether, TMS derivative	12611717945	11619998001	14394215371	3065254677	11548936217	13511148317	12280338112	9029537045	9587694027	12012046582	10659259492	13102904354	6178300364	5069286645	19593989259	16613402838	3758377491	0.332456
NA_M000000_A140006-101-xxx_NA_1366,21_PRED_1382,75_MOSYS_PRED_VAR5_ALK	22405838	24079196	13329196	25522511		15283244	33761700	19694701	36308291	25017471	13314147	23597800	49382470	79263505	51500947	46776277	13726186	0.429626
DL-Alanine, N-methyl-N-hexyloxycarbonyl-, decyl ester			511809												5206739
Indole-3-lactic acid, 3TMS derivative	231560610	240460716	139218465	233509123	442790559	268365226	320237844	140096063	298831259	369412284	210983620	253848233	559809785	430293481	493164850	517771024
Pentanoic acid, 2-(methoxyimino)-3-methyl-, trimethylsilyl ester	394528026				170574397		330538327	215515707	587574012	1089264430		767518979	922323447	907430757	1115624444	944900780
Dihydroxyacetone phosphate (1MEOX) (3TMS) BP_M000327_A177006-101-x1[NA]_NA_1746,58_TRUE_VAR5_ALK								460574865		949593315		863261875		1874799701	2308385312	1920704051
Sarcosine ethyl ester hydrochloride										835247				2639379	5796949		331416	0.107236
1-(2-(3-Cyclohexenyl)ethyl)silatrane															6554694
l-Leucine, N-methyl-N-(2-methoxyethoxycarbonyl)-, dodecyl ester		41480603	43237608	29795821	46463546	44195965	40098679	24969035	89555646	78220384	59702654	107449917	174823003	163793449	137793728	168754701
1-(2-(3-Cyclohexenyl)ethyl)silatrane															6554694
Sulfuric acid, 2TMS derivative															78660809
(Z)-5-Methoxy-3,5-dimethyl-2-hexenyltrimethylsilane		5292926	123195345		177764098	244278627							138418284	145876629	150804613	99749105
Methylal		74294346								776348660			1310228071		1432161266	3049065408
Decane, 3-ethyl-3-methyl-			38129667												26646102
NA_M000000_A287007-101-xxx_NA_2866,73_PRED_2958,03_MOSYS_PRED_VAR5_ALK															8882695
Cyclopropane, 1-methyl-2-(3-methylpentyl)-					271680591	258032636							227862865		6769239	79263222
NA_M000000_A277004-101-xxx_NA_2754,72_PRED_2840,44_MOSYS_PRED_VAR5_ALK										19907795	28745831	50002773			14636694	70584843
Indole-3-pyruvic acid (1MEOX) (2TMS) MP_M001050_A219009-101-x1[NA]_NA_2197,08_TRUE_VAR5_ALK		600854887	461100822	643055245	630290852	402477487	350196488	238503737	254539045	400040547	207839282	280698044	593670726	253571299	391635283	371685113
2-Ethylhexanal ethylene glycol acetal	2065949294	3127104561	3364562269	2094212669	6591533834	9205552934	4993880615	4889900202	6195081305	6575451861	5596187701	5121177774	9977499074	9757836565	10299805670	10190956404	10838428	0.00173334
Undecane, 4-methyl-	108202550		67063290			102747932	107542652	22841038			69628372			73473332	87316465		68820235	0.861848
2-Piperidinecarboxylic acid (2TMS)_M000528_A137004-101-xxx_NA_1365,15_TRUE_1381,64_MOSYS_PRED_VAR5_ALK	712642868	752173748	532380699	598127109	893580387	834575333	672981952	330973686	855089456	1081760985	458944820	513782313	1306481625		1142136223	1207397018	169145644	0.213334
4-tert-Octylphenol, TMS derivative		50268944		28034453	247804950		48049198	61014845	45807819	20903714	138110302			37586476	27075046		46275246	0.656707
Unknown#bth-pae-035_M000000_A153019-101-xxx_NA_1521,51_PRED_1545,79_MOSYS_PRED_VAR5_ALK									70666137	90239746		77700475	39386949	104705561	62682332	59186128
Glucopyranose [-H20] (4TMS)_M000040_A177004-101-xxx_NA_1755,94_TRUE_1791,90_MOSYS_PRED_VAR5_ALK		901235770	261148782		799888559	743788962	660678121		905868677				5056854147	4831471713	4713964619	4529158816
Benzenemethanol, 2-chloro-α-[[(1-methylethyl)amino]methyl]-		117503592		83952107	71856173		66240156		307924565	501229992	113467615	113815370	123513586	329940530	973433628	189772573	14701379	0.0589499
Phosphoric acid, 3-(methoxyimino)-2-[(trimethylsilyl)oxy]propyl bis(trimethylsilyl) ester, (±)-	49540425	50928876	36525276	44837903			63574444	29065438	59877082	19689417	19178039		83193162		93269208	76900679
4-Pyridinol, TMS derivative		14206916			13754577		21100028	16048931		33369686	20700490			27030013	27395588	26697556
NA170001 (classified unknown)_M000000_A170001-101-xxx_NA_1688,9_PRED_1721,52_MOSYS_PRED_VAR5_ALK															7874498
2,2,4,4,5,5,7,7-Octamethyloctane															54193273
Glucose-6-phosphate, 2-amino-2-deoxy- (1MEOX) (6TMS) BP_M000771_A236010-101-x1[NA]_NA_2358,48_TRUE_VAR5_ALK					31624299	48817088	28928361			65052238	89208369	70575105		406085106	470327701	253202190
3-Pyridinol, TMS derivative		69350060		62050919			67734234		76928274	87403849	53995025	67520970		95003334	81741942		37502503	0.510062
NA_M000000_A116011-101-xxx_NA_1164,86_TRUE_1171,37_MOSYS_PRED_VAR5_ALK	261103635	274417543			310669180	264912099	293358584	380177685	351537531	473625812	291878802			378233352	343590387	348713380	152403787	0.460409
Silane, diethylbutoxypentyloxy-	21315750	21225363	13613479		25144242	19591951	22502417		30459136	24897064	23692174	28835454	164170601	141201624	135480211
Benzothiazole, 2-(2-hydroxyethylthio)-	2505898644	2505042298	2351868974	2490168644	2699869736	291690404	263624159	113669608	2680438737	2766458380	2370305869	2306981732	2623759767	2564785333	2746684376	2490726430	187151071	0.0886657
DL-Alanine, N-methyl-N-(byt-3-en-1-yloxycarbonyl)-, byt-3-en-1-yl ester	80075765	32838167		60160689	89598206		88150105		83124239	63259397	51722237	39090937	85100772	47598895	57187172	55248102
Pentanoic acid, 3-methyl-2-[(trimethylsilyl)oxy]-, trimethylsilyl ester	38824105	23398592		35957728			16439823	11140794	25834040	26778685	20105229		13615356	21524383	26834696	15000105	23805051	1.03706
Alanine, N-methyl-n-propargyloxycarbonyl-, heptyl ester									159866571				66477165	53881326	35123638	254966146
NA_M000000_A145008-101-xxx_NA_1447,39_PRED_1467,98_MOSYS_PRED_VAR5_ALK	431163115	320036730	243111101	347526429	442988149	244465096	239745122	134494342	212139871		158542802	123424433	377295410	223904094	249902618	281005251	43092939	0.160406
Siloxane_M000870_A271010-101-xxx_NA_2716,61_PRED_2800,43_MOSYS_PRED_VAR5_ALK	1390536470	1541983079	1898631106	1846191159	2056886208	1943287456	3236493979	1965434543	978972799	3032779113	2012528058	2309100281	1242646911	252461553	1581657724	1531070887	654214062	0.363192
Thymidine-5'-monophosphoric-acid_3TMS_M000000_A282014-101-x1[NA]_NA_2816,53_PRED_VAR5_ALK	105035774	97017869	69386654	88585447	84917082	110500037	102964503	57879148	92076882	107103130	90216816	117361318	277056579	230498836	263694776	243250946
Unknown#sst-cgl-114_M000000_A229006-101-xxx_NA_2290,3_PRED_2352,88_MOSYS_PRED_VAR5_ALK													40905108	49892180	30582231
Siloxane_M000870_A225011-101-xxx_NA_2256,43_PRED_2317,32_MOSYS_PRED_VAR5_ALK															11634616
{4-Methoxy-2-[(trimethylsilyl)oxy]phenyl}{2-[(trimethylsilyl)oxy]phenyl}methanone	16193719	16525335		16940443			19127098	8304189	11977092	20219521	20092585	22728953	26628493	55276834	47852531	27209309
Trehalose, alpha,alpha'-, D- (8TMS)_M000671_A274002-101-xxx_NA_2726,3_TRUE_2809,10_MOSYS_TRUE_VAR5_ALK								15476079		22789470				34624093	18584233
Norleucine, N-trimethylsilyl-, trimethylsilyl ester													65012987	65147359	70453630	50347591
1-(2-(3-Cyclohexenyl)ethyl)silatrane															6554694
Furfuryl alcohol, TMS derivative													66656951	44524649	53448636
5-(Piperidin-1-ylmethyl)-3-pyridin-3-yl-5,6-dihydro-4H-1,2,4-oxadiazine	21917432				19852591										18311312
3H-1,2,4-Triazol-3-one, 1,2-dihydro-	5960669	9408959	7696463	4905621	20497955	9914200	21311734	9114839	20424635	22179411	18551350	18531232	27224532	31285835	5824196	23569164	8652220	0.539918
Glutamine, DL- (3TMS)_M000032_A178001-101-xxx_NA_1766,72_TRUE_1786,50_MOSYS_TRUE_VAR5_ALK	721688274		333330227	557883786	1973241351	2187079948	2029063694	1285393959	4061614925	4276162420	3829103533	3270939394	3827131063	4469196634	4702169167	3765524134
Unknown#sst-cgl-008_M000000_A124007-101-x1[NA]_NA_1238,44_PRED_VAR5_ALK	722705416	552110815	537373841	743068822	489607358		614319961	309749914	320708490	505314337	408690666	411003111	273599805		281713669	236909085
Dodecane, 4,6-dimethyl-	538490245	409714861	262110176	434305828	490033160	458051423	453579464	85047220	347301884	307386200	347817603	331949242	314577779	374963652	457785921	250623762	479679480	1.30887
Acetic acid, TMS derivative		18876469								41261966		33966773			39223006
Glucose-6-phosphate (1MEOX) (6TMS) MP_M000513_A233002-101-xxx_NA_2307,34_TRUE_2370,77_MOSYS_PRED_VAR5_ALK	3236408305	3431838135	2229847357	3540993886	2864520608	3632359107	3230291726	1919756922	3075108811	2750399571	3585370879	4135739577	9360881475	9935264882	6299208384	5685151218
5-Methyluridine, 3TMS derivative															287744987
NA_M000000_A118006-101-xxx_NA_1189,63_TRUE_1197,38_MOSYS_PRED_VAR5_ALK	19743295	32731899			22104499					35581821	47129703	26350198	44681885	48438654	63457659	58589128	30505960	0.764927
Silanamine, N-[2-[2-methoxy-4-[(trimethylsilyl)oxy]phenyl]ethyl]-1,1,1-trimethyl-N-(trimethylsilyl)-													85491959	67273536	69415421	66311538
Maltitol, nonakis(trimethylsilyl) ether															7355327
Cycloheptasiloxane, tetradecamethyl-	13215667	16696153	18319653	18990038	26593886		40115486	20418839	12283229	62948394	14266053	33802152	44411952	12245462	47089398	39929314
l-Norvaline, n-propoxycarbonyl-, undecyl ester												26881790	155964999	155080107	151642014	108713753
N,N'-Diacetylchitobiose (1MEOX) (6TMS) MP_M001136_A301006-101-xxx_NA_3018,88_TRUE_3117,76_MOSYS_PRED_VAR5_ALK						278968662			384990824	373828433	315062262	352410039	879418340	961385582	928573216	843871512
2-Propenoic acid, 2-[(trimethylsilyl)oxy]-, trimethylsilyl ester	159458096	106554654		141845853			109194242			157271433	141470257	142646012		215281704	208392518		78519363	0.511299
Pyridine, 3-methyl-2,6-diphenyl-	94567523		17901707	30782698	199695196		226957668			518375110	233667582	246733117		145017530	216839091
Dodecane, 2,6,10-trimethyl-															35756941
Ribulose-5-phosphate (1MEOX) (5TMS) MP_M000769_A212012-101-x1[NA]_NA_2102,51_TRUE_VAR5_ALK		818762012									916996709			3190286976	1501897841	960266057
Pyridine, 1-oxide							148452138		259600623	390706337	130333548	205884330		305977716	292389103	161354188
Glucose-6-phosphate, 2-amino-2-deoxy- (1MEOX) (6TMS) MP_M000771_A236009-101-x1[NA]_NA_2346,1_TRUE_VAR5_ALK				25719261			50640724	23487949		68993196		104908122	355804120	374358752	365646110	263280600
d-Proline, N-ethoxycarbonyl-, heptyl ester													70842898	65454921	73770115	59797538
2-Butene-1,4-diol, (E)-, 2TMS derivative															26520338
Unknown#sst-cgl-122_M000000_A266012-101-xxx_NA_2659,18_PRED_2740,14_MOSYS_PRED_VAR5_ALK															21870054
D-Ribofuranose, 2,3,5-tris-O-(trimethylsilyl)-, bis(trimethylsilyl) phosphate														150329660	125484697
Octane, 2,7-dimethyl-															84638713
Octane, 2,4,6-trimethyl-	144154438	44777811		36832672	126416934		144352099		41031457	31374322	19270259			17607909	126421455		188147148	2.56948
Unknown#sst-cgl-078_M000000_A184036-101-xxx_NA_1840,13_PRED_1880,28_MOSYS_PRED_VAR5_ALK	52420399	52512765	58760283	54398043	22454521	29474756	31480793	16010947	77015236	50745481	63408194	101304666	160719297	149722714	131447671	148706827
Pantothenic acid tritms															344143206
1-(2-(3-Cyclohexenyl)ethyl)silatrane															6554694
Tridecane, 2-methyl-	449539409	328338717	308141519	389648520	334080695	431616525	330823582	120962175	315921844	356100918	315237463	298117780	310296006	313287676	354569311	318450275	331269468	1.00477
Monomethyl succinate, trimethylsilyl ester	256014313	224168960		235979299	382263587		277571388	162633172		370640322	226763581	236366319	656915703		423494526	509192555
Phenol, 2,4-bis(1,1-dimethylethyl)-, phosphite (3:1)						41926816	47332874						29395078		19715177	18285479	123118612	3.9296
Hydrobenzoin, 2TMS derivative															12140539
2-Piperidinecarboxylic acid (2TMS)_M000528_A137004-101-x1[NA]_NA_1365,15_TRUE_VAR5_ALK	4342046251	3994663876	4475103320	4115400708	5699322983	6082466858	5620467277	3719997962	9501500166	8613807370	9354304835	10894203417	11018104879	11445383286	11497265811	10803882755	339751420	0.0448598
Bernzothiazole, 2-[2-(2-fluorophenoxy)ethylthio]-	174344888	170163595	160470486	170337640	195887156	17271624	14117652		186629191	194430554	172972341	163779588	209043927	202740942	215332345	194895941
D-Mannose, 2,3,4,5-tetrakis-O-(trimethylsilyl)-, O-methyloxime, 6-[bis(trimethylsilyl) phosphate]	3233206754	3428431378	2227679878	3537424352	2861624268	3628765363	3227090024	1917904716	3072080188	2747699434	3581740375	4131496056	9349223813	9922951481	9474182662	5678174529
Unknown#sst-cgl-040_M000000_A163017-101-xxx_NA_1628,54_PRED_1658,15_MOSYS_PRED_VAR5_ALK	37196246	34845075		31150270	96402021	133722481	61175751	35016058	161339630	192096903	120767784	217818333		952419087	816919164	743858794
Siloxane_M000870_A219007-101-xxx_NA_2188,76_PRED_2246,28_MOSYS_PRED_VAR5_ALK	1861757530	2269588259	2448550446	2741782345	3414622832	2814574014	4474108547	2606551068	1270635484	5171885190	1997352162	3406195420	2435336535	481900064	3072772347	3057716695	449399997	0.1652
2,5-Di(trifluoromethyl)benzoic acid, 4-nitrophenyl ester					706039										14968925
Unknown#bth-pae-059_M000000_A107001-101-x1[NA]_NA_1060,6_PRED_VAR5_ALK										26820796		20420387	226279592	57562320	59578953	38682965
Hexasiloxane, tetradecamethyl-	22917304		17179051	19374204	23005209	24099370	21421872	13897221		22418608		18885442	22769299	21954901	21282894	23276486	#N/A
Phthalic acid, hept-4-yl isobutyl ester	58812883	51849617	44551337	56558242	55804956	55854404		23016572	62857786		59112027			71280944	64378314	75000702	30462100	0.538297
D-(-)-Ribofuranose, tetrakis(trimethylsilyl) ether (isomer 1)					308818939	269661073		117413716				392328927	2336164229	2201264992	2307525741	1953701668
Trehalose, alpha,alpha'-, D- (8TMS)_M000671_A274002-101-xxx_NA_2726,3_TRUE_2809,10_MOSYS_TRUE_VAR5_ALK								15476079		22789470				34624093	18584233
Adipic acid (2TMS)_M000471_A151006-101-x1[NA]_NA_1500,92_TRUE_VAR5_ALK	473861350	446027042	358570397	465609492	410612467	406015837	499453233	214134337	514174127	439136504	439341660	419370277	771162095	648014058	693878606	545582312	340049684	0.702496
4-Chloro-1-azabicyclo[2.2.2]octane										15056639					11099750
Ornithine, N2-acetyl- (3TMS)_M000409_A200002-101-xxx_NA_1997,44_TRUE_2045,43_MOSYS_PRED_VAR5_ALK	222909744	206993011	148728654	249575091	338532938	293638376	314946005	188968173	287746395	337779235	213412573	297021262	746968412	517148820	587513335	618819162
3-Indolylacetamide, TMS derivative													24040545		21303799
Tridecane, n-_M000533_A130004-101-x1[n-]_NA_1293,26_PRED_VAR5_ALK							73703385			81525411					101667831
N-Ethyl-2-carbethoxyazetidine													3861093416		2371744127
1-Methoxy-2-propanol, TMS derivative				21612865						35939715				50942556	64931697
l-Norvaline, N-ethoxycarbonyl-, pentadecyl ester													48266787	45341965	51635223	40430750
L-Asparagine, Nγ-[2-(acetylamino)-4-O-[2-(acetylamino)-2-deoxy-3,4,6-tris-O-(trimethylsilyl)-β-D-glucopyranosyl]-2-deoxy-3,6-bis-O-(trimethylsilyl)-β-D-glucopyranosyl]-													62294796	79599153	60224441	45791809
1,3-Dipentyl-heptabarbital		554131289	3567562772	3762654724	3943834867	3819430287	3787723885	3048345581	3793546018	3765466224	653877107	466391242	3749468593	3651997000	3734067415	3656276498	3819243494	1.24663
4-Pyrimidinamine, N-(trimethylsilyl)-2-[(trimethylsilyl)oxy]-	138258446	162364015	146767357	148055072	108051264	131834201	99160314	91990595	69317138	90369132	62669090	73397918	75695780	56216126	46030900	70523256	38069379	0.387795
Silanol, trimethyl-, carbonate (2:1)		2686407416	1737995469			1791550835			2069805417	61843576	207192304		3009177569	97914460	158834083
1,3,5-Trisiloxane, 1,1,3,3,5,5-hexamethyl-1,5-di(tert.butyl)-		9246027868	9876001150			11879029302	2110921272	3109750013	10163072574	2413567688	5752633830		9318469766		1396118281	6565163099
Unknown#bth-pae-014_M000000_A117009-101-xxx_NA_1167,66_PRED_1174,31_MOSYS_PRED_VAR5_ALK											15038080			24186080	61054516
Pipecolic acid, 2TMS derivative							90075297	92640916		141765080		120651219	552474654	502024111	616290455	548294337
α-D-Lactose, 8TMS derivative															30386684
Sulfurous acid, decyl 2-ethylhexyl ester															58473370
1-(2-(3-Cyclohexenyl)ethyl)silatrane															6554694
1-(p-Methoxyphenyl)-2-phenylbenzimidazole	3738610506	3447404749	4269042573	983442015	3426583090	3974520802	3637587763	2661277833	2841613426	3562053257	3163582533	3881962112		746294566	1177019111	1146320228	1099169896	0.386512
Methylal		74294346								776348660			1310228071		1432161266	3049065408
Cyclodecasiloxane, eicosamethyl-	93262118	138179492	187340984	135348637	307393661	244746924	153663465	95449853		331677654	139286579	327702726	464865204	63621223	466490582
1-Isopropoxy-2-trihexylsilyloxybenzene		12950839	12378788	13125885	13599671	13867979	11168730	7763980	12458229	14860688	10977416	10237737	21021535	16876177	16737226	16606792	5416270	0.397026
3-Butene-1,2-diol, 1-(2-furanyl)-															13471343
D-Erythro-Pentose, 2-deoxy-3,4-bis-O-(trimethylsilyl)-, 5-[bis(trimethylsilyl) methoxyphosphorimidate]												77182276	209727398	221326464	278706570
5-Hydroxytryptophan, 4TMS derivative												7161887	49720464	58452834	53314609	48379321
1-Aminocyclopentanecarboxylic acid, 3-chloropropoxycarbonyl-, tridecyl ester							10737353						74996428	57083602	65594037	67607870
1-(2-(3-Cyclohexenyl)ethyl)silatrane															6554694
4,4'-Biphenyldiol, 2TMS derivative					5607752	4556436			3884064	5688889			10475641	9417094	7417718	7442178
Thymidine, 3'-O-(trimethylsilyl)-, 5'-[bis(trimethylsilyl) phosphate]															55550754
1-Octylsilatrane															15850384
NA_M000000_A235007-101-x1[NA]_NA_2322,67_PRED_VAR5_ALK															296144850
1-Morpholinopropan-2-ol trifluoroacetate					62096990	231982643	303936959				304388015		256884355	359589252	590038671	148558701
Undecane	254274279		137067773	185112237			197744547				137331769	150343574		161001326	121204914		171418170	1.02029
beta-Alanyl-lysine (6TMS)_M001083_A255007-101-x1[L-]_NA_2553,19_TRUE_VAR5_ALK						66470543	83054848	31548313	76844119	100859673	96033754	94733633	308968729	317262534	402871087	284285430
Methyl (2R,3R,4S)-3-(tert-butyldimethylsilyloxy)-2,4-dimethylhexanoate														37563500	39016791		11753653	0.306963

## Sheet: Retention Time
	3h V1	3h V2	3h V3	3h V4	6h V1	6h V2	6h V3	6h V4	3h C1	3h C2	3h C3	3h C4	6h C1	6h C2	6h C3	6h C4	Medium	Retention Index-Range
*1-(2-(3-Cyclohexenyl)ethyl)silatrane	1518.72	1518.62	1518.61	1518.7	1518.95	525.149	525.149	525.149	1519.03	1518.99	1518.9	525.149	525.149	525.149	525.149	525.149	525.149	993.881
*Methylal	622.756	615.463	622.776	622.76	622.381	568.36	622.377	622.579	622.507	566.574	622.482	622.425	566.656	622.563	568.36	567.432	622.221	56.202
*Methylal	622.756	615.463	622.776	622.76	622.381	568.36	622.377	622.579	622.507	566.574	622.482	622.425	566.656	622.563	568.36	567.432	622.221	56.202
*Hexasiloxane, tetradecamethyl-	629.626	629.405	629.683	629.674	629.168	629.18	629.236	629.599	629.347	629.358	629.363	629.281	629.418	629.431	629.454	629.5	629.454	0.515
*Unknown#sst-cgl-008_M000000_A124007-101-x1[NA]_NA_1238,44_PRED_VAR5_ALK	537.958	536.631	536.758	538.159	536.456	535.799	537.176	536.578	536.888	536.909	536.931	536.929	555.772	536.796	536.827	536.452	536.529	19.973
1H-Pyrrole-2,5-dicarbonitrile	449.209	448.536	449.839	449.121	449.209	449.209	448.338	447.23	450.058	449.105	449.209	451.139	449.931	449.209	449.209	447.505	449.142	3.909
Dodecane, 4,6-dimethyl-	362.786	361.072	360.131	361.583	361.708	360.758	361.901	363.748	361.205	362.006	361.901	361.691	360.885	361.777	361.846	359.868	362.275	3.88
Dodecane, 4,6-dimethyl-	362.786	361.072	360.131	361.583	361.708	360.758	361.901	363.748	361.205	362.006	361.901	361.691	360.885	361.777	361.846	359.868	362.275	3.88
Dodecane, 4,6-dimethyl-	362.786	361.072	360.131	361.583	361.708	360.758	361.901	363.748	361.205	362.006	361.901	361.691	360.885	361.777	361.846	359.868	362.275	3.88
Dodecane, 4,6-dimethyl-	362.786	361.072	360.131	361.583	361.708	360.758	361.901	363.748	361.205	362.006	361.901	361.691	360.885	361.777	361.846	359.868	362.275	3.88
*Oxalic acid, 2TMS derivative	430.87	430.313	430.87	430.932	432.688	430.87	430.103	430.87	430.697	430.727	430.938	430.916	428.993	430.787	430.87	429.116	430.924	3.695
1,3,5-Trisiloxane, 1,1,3,3,5,5-hexamethyl-1,5-di(tert.butyl)-	303.156	304.193	303.946	303.156	303.156	304.177	303.401	301.597	304.659	303.251	305.141	303.156	304.967	303.156	303.156	302.585	303.156	3.544
1,3,5-Trisiloxane, 1,1,3,3,5,5-hexamethyl-1,5-di(tert.butyl)-	303.156	304.193	303.946	303.156	303.156	304.177	303.401	301.597	304.659	303.251	305.141	303.156	304.967	303.156	303.156	302.585	303.156	3.544
(Z)-5-Methoxy-3,5-dimethyl-2-hexenyltrimethylsilane	323.663	322.166	323.159	323.663	325.62	324.036	323.663	323.663	323.663	323.663	323.663	323.663	323.765	323.478	323.663	323.661	323.663	3.454
Benzenemethanol, 2-chloro-α-[[(1-methylethyl)amino]methyl]-	394.925	395.093	394.925	395.938	393.249	394.925	394.928	394.925	395.826	394.508	396.328	396.219	392.986	396.132	394.925	393.253	396.403	3.417
Decane, 2,2-dimethyl-	311.761	308.399	309.977	309.069	310.317	309.977	310.446	309.977	309.977	310.19	310.06	309.576	308.94	309.841	309.977	309.977	310.525	3.362
*Glycolic acid, 2TMS derivative	381.015	380.062	381.319	380.913	381.319	381.319	379.934	382.48	380.893	381.104	381.447	381.25	383.285	381.216	381.319	381.319	381.416	3.351
3H-1,2,4-Triazol-3-one, 1,2-dihydro-	503.307	502.834	501.702	503.326	501.913	500.071	502.522	501.887	502.896	502.849	502.987	503.026	502.257	502.845	501.573	501.997	501.059	3.255
Ethylene glycol, 2TMS derivative	305.586	302.445	304.065	303.431	304.821	302.511	304.145	304.065	303.023	304.145	304.182	303.964	302.81	303.867	304.065	304.065	304.738	3.141
3-Carene	329.754	326.829	328.195	327.639	328.367	328.195	328.539	328.195	327.146	328.349	328.195	327.778	327.27	328.049	328.195	328.195	328.644	2.925
1,3-Dioxolane	305.268	305.268	303.946	305.305	306.71	304.177	306.46	305.268	304.928	305.775	305.744	305.667	304.038	306.151	305.268	305.268	306.387	2.764
1,3-Dioxolane	305.268	305.268	303.946	305.305	306.71	304.177	306.46	305.268	304.928	305.775	305.744	305.667	304.038	306.151	305.268	305.268	306.387	2.764
1,3-Dioxolane	305.268	305.268	303.946	305.305	306.71	304.177	306.46	305.268	304.928	305.775	305.744	305.667	304.038	306.151	305.268	305.268	306.387	2.764
1,3-Dioxolane	305.268	305.268	303.946	305.305	306.71	304.177	306.46	305.268	304.928	305.775	305.744	305.667	304.038	306.151	305.268	305.268	306.387	2.764
Boric acid, 3TMS derivative	305.463	304.602	303.946	305.207	306.71	304.177	306.46	305.463	304.928	305.775	305.744	305.667	304.967	305.791	305.463	305.463	306.414	2.764
*Pentanoic acid, 2-(methoxyimino)-3-methyl-, trimethylsilyl ester	474.214	475.747	474.132	476.22	474.768	474.132	473.478	474.818	474.027	476.074	476.195	476.103	474.769	474.07	474.132	474.872	474.132	2.742
Pentanoic acid, 2-(methoxyimino)-3-methyl-, trimethylsilyl ester	474.214	474.132	474.132	474.132	474.768	474.132	473.478	474.818	474.027	476.074	474.132	476.103	474.769	474.07	474.132	474.872	474.132	2.625
Undecane, 4-methyl-	412.355	411.715	410.126	411.715	411.715	410.479	411.395	409.776	411.715	411.715	411.54	411.715	411.715	411.49	411.715	411.715	411.812	2.579
*Methyltris(trimethylsiloxy)silane	349.627	348.226	347.126	348.784	348.583	347.705	348.732	348.911	348.312	349.028	348.959	348.872	347.802	348.822	348.911	348.911	349.378	2.501
*Methyltris(trimethylsiloxy)silane	349.627	348.226	347.126	348.784	348.583	347.705	348.732	348.911	348.312	349.028	348.959	348.872	347.802	348.822	348.911	348.911	349.378	2.501
*Propylene glycol (2TMS)	316.972	314.728	315.976	315.525	316.528	314.646	315.709	315.976	315.04	316.04	316.088	315.926	314.727	315.826	315.976	315.976	316.615	2.326
*2,2'-Bipyrrolidine	469.857	469.618	469.216	470.096	468.372	469.216	468.748	469.789	469.264	469.226	469.333	469.428	467.807	469.255	469.216	469.216	469.216	2.289
Proline (1TMS)_M000029_A117006-101-x1[L-]_NA_1176,03_TRUE_VAR5_ALK	469.857	469.618	469.359	470.096	468.372	469.359	468.748	469.789	469.359	469.226	469.393	469.517	467.807	469.319	469.359	469.359	469.359	2.289
Silanol, trimethyl-, carbonate (2:1)	301.15	302.445	301.711	301.15	301.15	302.511	301.15	301.15	303.023	300.772	301.249	301.15	302.81	300.966	301.15	301.15	301.15	2.251
*Hydroxylamine (3TMS)	417.954	417.23	415.908	417.635	416.77	416.266	417.206	415.71	417.227	417.641	417.607	417.563	416.539	417.509	417.568	416.382	417.799	2.244
Etoxeridine	854.247	856.223	854.246	856.223	856.223	854.303	856.223	854.353	854.262	854.883	854.747	854.779	855.969	856.125	856.223	856.469	856.223	2.223
Diamide	391.066	390.152	391.033	390.99	391.033	391.033	389.911	391.033	390.732	390.9	391.207	391.182	391.033	391.019	391.033	392.127	391.033	2.216
*Diethylene glycol, 2TMS derivative	533.431	532.786	532.251	533.079	532.158	531.225	532.348	532.162	533.199	532.907	533.135	533.158	532.357	533.054	533.158	532.461	532.604	2.206
*Adenosine-5-monophosphate (4TMS)	1682.93	1682.95	1682.8	1683.04	1683.01	1683.14	1683.12	1682.69	1682.81	1682.98	1682.88	1683.01	1683.44	1683.18	1683.58	1683.33	1684.89	2.2
*NA114002 (classified unknown)_M000000_A114002-101-x1[NA]_NA_1129,96_TRUE_VAR5_ALK	441.172	440.296	440.767	441.004	440.767	440.767	440.245	440.767	440.612	440.572	440.921	440.833	438.976	440.779	440.767	439.022	440.846	2.196
DL-Alanine, N-methyl-N-(byt-3-en-1-yloxycarbonyl)-, byt-3-en-1-yl ester	429.471	428.78	429.268	429.458	427.356	429.268	428.498	429.268	429.103	429.142	429.342	429.439	427.291	429.201	429.268	427.426	429.268	2.18
*2-Ethylhexanal ethylene glycol acetal	584.17	583.869	583.62	584.23	583.261	582.876	583.696	583.767	584.087	584.127	584.117	583.972	584.364	585.055	584.014	584.39	583.723	2.179
2-Ethylhexanal ethylene glycol acetal	584.17	583.869	583.62	584.23	583.261	582.876	583.696	583.767	584.087	584.127	584.117	583.972	584.364	585.055	584.014	584.39	583.723	2.179
2-Ethylhexanal ethylene glycol acetal	584.17	583.869	583.62	584.23	583.261	582.876	583.696	583.767	584.087	584.127	584.117	583.972	584.364	585.055	584.014	584.39	583.723	2.179
2-Ethylhexanal ethylene glycol acetal	584.17	583.869	583.62	584.23	583.261	582.876	583.696	583.767	584.087	584.127	584.117	583.972	584.364	585.055	584.014	584.39	583.723	2.179
Undecane	406.202	405.426	404.026	405.667	405.426	405.426	405.512	405.426	405.426	405.426	405.484	405.352	405.426	405.213	405.426	405.426	405.806	2.176
N,N-Diethylheptylamine	875.686	875.686	875.397	875.686	875.686	875.686	877.279	875.686	875.686	877.385	875.686	875.686	875.686	875.686	875.686	877.549	875.686	2.152
1,3-Propanediol, 2TMS derivative	362.01	361.35	362.26	362.214	360.662	362.26	361.26	362.26	361.688	362.299	362.353	362.379	362.26	362.157	362.26	362.26	362.803	2.141
Propylene glycol, 2TMS derivative	343.708	342.725	343.567	343.386	343.567	341.618	342.816	343.567	342.877	343.656	343.656	343.586	343.567	343.459	343.567	343.567	343.567	2.09
Unknown#bth-pae-059_M000000_A107001-101-x1[NA]_NA_1060,6_PRED_VAR5_ALK	373.551	373.551	373.551	373.551	373.551	373.551	373.551	373.551	373.551	373.597	373.551	373.685	371.606	373.462	373.551	371.839	373.551	2.079
Unknown#bth-pae-059_M000000_A107001-101-x1[NA]_NA_1060,6_PRED_VAR5_ALK	373.551	373.551	373.551	373.551	373.551	373.551	373.551	373.551	373.551	373.597	373.551	373.685	371.606	373.462	373.551	371.839	373.551	2.079
Silanol, trimethyl-, phosphate (3:1)	564.263	563.743	563.569	564.523	563.108	563.076	563.612	563.378	563.923	563.61	563.786	564.368	564.986	563.571	564.264	564.213	562.949	2.037
Phosphoric acid, bis(trimethylsilyl)monomethyl ester	474.98	474.475	473.04	475.031	473.437	474.678	474.161	473.264	474.577	474.569	474.686	474.778	473.507	474.606	474.678	473.532	474.751	1.991
Cyclotetrasiloxane, octamethyl-	323.914	322.166	323.162	322.852	323.389	321.929	322.859	323.162	322.356	323.162	323.233	323.097	321.987	323.037	323.162	323.162	323.732	1.985
*4-Trimethylsilylphenol	361.169	360.445	361.229	361.186	359.868	361.229	360.23	361.229	360.586	361.314	361.317	361.353	361.229	361.126	361.229	361.229	361.843	1.975
Phosphoric acid (3TMS)_M000075_A129001-101-xxx_NA_1262,42_TRUE_1273,79_MOSYS_PRED_VAR5_ALK	564.263	563.743	563.569	564.523	563.108	565.083	565.083	563.378	563.923	563.61	563.786	564.621	564.986	564.455	565.083	564.213	565.083	1.975
Acetic acid, TMS derivative	332.64	330.682	332.64	332.64	332.64	332.64	332.64	332.64	332.64	332.271	332.64	332.62	332.64	332.64	332.64	332.64	332.64	1.958
Octane, 2,4,6-trimethyl-	534.865	533.232	534.415	533.079	533.742	534.415	533.578	534.415	533.199	532.907	533.135	534.415	534.415	533.054	534.415	534.415	533.697	1.958
L-Leucine, TMS derivative	451.852	451.291	451.714	451.888	450.045	451.714	450.965	451.714	451.532	451.575	451.755	451.774	449.931	451.637	451.714	451.714	451.714	1.957
Methoxyamine, TMS derivative	327.802	326.345	327.793	327.639	327.793	327.793	326.378	327.793	327.146	327.47	328.022	328.11	327.793	327.628	327.793	327.793	328.302	1.957
*Isovaleric acid, 2-oxo- (1MEOX) (1TMS) BP_M000449_A121003-101-x1[NA]_NA_1121,66_TRUE_VAR5_ALK	435.6	434.82	435.545	435.414	435.545	435.545	434.622	435.545	435.329	435.412	435.603	435.449	435.545	435.479	435.545	433.655	435.545	1.948
4-Pyridinol, TMS derivative	450.68	451.291	450.68	450.68	449.524	450.68	450.081	449.346	450.68	450.731	450.816	450.68	450.68	450.637	450.68	449.456	450.68	1.945
*Carbitol	457.65	457.06	457.569	457.634	455.915	457.569	456.822	455.723	457.389	457.432	457.602	457.577	455.94	457.477	457.569	456.033	457.547	1.927
Pyruvic acid (1MEOX) (1TMS)_M000071_A104002-101-xxx_NA_1037,28_TRUE_1065,40_MOSYS_TRUE_VAR5_ALK	358.444	357.32	358.986	358.352	358.986	358.986	357.188	358.986	358.324	358.722	359.107	358.826	358.986	358.86	358.986	358.986	358.986	1.919
Hexanoic acid, TMS derivative	375.258	374.771	375.756	375.676	375.756	375.756	374.28	375.756	375.247	375.69	375.898	375.909	375.756	375.664	375.756	375.756	376.184	1.904
Undecane, 4,7-dimethyl-	395.271	394.778	393.732	395.24	394.819	394.178	395.271	395.271	395.271	395.379	395.271	395.271	394.37	395.224	395.271	395.271	395.62	1.888
NA_M000000_A116011-101-xxx_NA_1164,86_TRUE_1171,37_MOSYS_PRED_VAR5_ALK	460.149	460.119	460.1	460.1	459.237	458.267	459.358	459.27	459.781	459.347	459.852	460.1	460.1	460.089	460.1	459.515	459.461	1.882
Lactic Acid, 2TMS derivative	369.227	367.708	369.227	368.639	369.227	369.227	367.411	369.227	368.718	368.865	369.151	369.025	369.227	369.097	369.227	369.227	369.278	1.867
2,5-Di(trifluoromethyl)benzoic acid, 4-nitrophenyl ester	988.28	988.28	988.28	988.28	990.129	988.28	988.28	988.28	988.28	988.28	988.28	988.28	988.28	988.28	988.28	988.28	988.28	1.849
Furfuryl alcohol, TMS derivative	314.404	314.404	314.404	314.404	314.404	314.404	314.404	314.404	314.404	314.404	314.404	314.404	312.565	314.234	314.404	314.404	314.404	1.839
L-Proline, 2TMS derivative	584.17	583.869	583.62	584.23	583.261	585.099	583.696	583.817	584.087	584.127	584.117	583.972	584.539	585.055	585.099	584.471	583.723	1.838
2-Methyl-1,3-propanediol, 2TMS derivative	385.12	384.969	384.969	384.969	383.613	384.969	384.343	384.969	384.969	385.057	385.043	384.969	383.285	384.872	384.969	383.401	384.969	1.835
*NA_M000000_A304001-101-xxx_NA_3022,95_PRED_3122,03_MOSYS_PRED_VAR5_ALK	1318.77	1318.57	1317.99	1318.24	1318.79	1317.65	1318.77	1318.09	1316.96	1318.66	1318.75	1318.66	1318.6	1318.2	1318.77	1318.15	1318.73	1.83
Monomethyl succinate, trimethylsilyl ester	470.496	469.934	470.398	470.495	468.669	470.398	469.746	468.7	470.398	470.259	470.405	470.472	469.002	470.398	470.398	469.016	470.398	1.827
Decane, 3-ethyl-3-methyl-	809.605	809.605	807.792	809.605	809.605	809.605	809.605	809.605	809.605	809.605	809.605	809.605	809.605	809.605	809.605	809.605	809.605	1.813
Nonane, 5-methyl-5-propyl-	356.914	356.914	356.914	356.914	356.914	356.914	356.914	358.722	356.914	356.914	356.914	356.914	356.914	356.914	356.914	356.914	356.914	1.808
Benzyl alcohol, TMS derivative	451.336	450.944	451.336	451.498	451.336	451.336	450.622	449.779	451.253	451.575	451.336	451.139	449.931	451.378	451.336	450.102	451.5	1.796
Methylal	568.36	615.463	568.36	568.36	568.36	568.36	568.36	568.36	568.36	566.574	568.36	568.36	566.656	568.36	568.36	567.432	568.36	48.889
Methylal	568.36	615.463	568.36	568.36	568.36	568.36	568.36	568.36	568.36	566.574	568.36	568.36	566.656	568.36	568.36	567.432	568.36	48.889
Methylal	568.36	615.463	568.36	568.36	568.36	568.36	568.36	568.36	568.36	566.574	568.36	568.36	566.656	568.36	568.36	567.432	568.36	48.889
L-Alanine, 2TMS derivative	405.184	404.86	405.765	405.667	405.765	405.765	404.381	405.765	405.423	405.875	406.166	406.037	405.765	405.895	405.765	405.765	405.765	1.785
Cyclopropane, 1-methyl-2-(3-methylpentyl)-	559.511	559.511	559.511	559.511	561.254	560.895	559.511	559.511	559.511	559.511	559.511	559.511	560.53	559.511	559.511	560.504	559.511	1.743
*Unknown#sst-cgl-004_M000000_A119012-101-x1[NA]_NA_1182,47_PRED_VAR5_ALK	485.291	485.291	485.291	485.74	485.291	485.291	485.291	485.291	485.117	485.044	485.249	485.302	484.115	485.173	485.291	484.059	485.291	1.681
Disiloxane, hexamethyl-	1356.43	1356.31	1356.34	1356.47	1356.47	1356.45	1356.38	1356.17	1356.38	1356.47	1354.93	1354.79	1356.42	1355.18	1356.47	1355.07	1356.47	1.68
Alanine, N-methyl-n-propargyloxycarbonyl-, heptyl ester	583.33	583.33	583.33	583.33	583.33	583.33	583.33	583.33	584.087	583.33	583.33	583.33	584.999	583.662	583.33	584.39	583.33	1.669
*Pyridine, 2-hydroxy- (1TMS)_M000413_A105003-101-xxx_NA_1031,31_TRUE_1031,17_MOSYS_PRED_VAR5_ALK	346.006	345.276	346.103	345.953	345.111	346.103	345.074	346.103	345.378	346.2	346.212	346.169	346.103	345.979	346.103	346.103	346.734	1.66
2,4-Dimethyldodecane	547.356	546.941	546.441	546.296	546.337	545.766	546.69	546.803	546.71	546.773	546.893	547.019	546.506	546.782	546.803	546.811	546.813	1.59
L-Proline, N-(3-methoxybenzoyl)-, undecyl ester	499.083	499.083	497.498	499.083	497.604	499.083	497.99	497.848	499.083	499.083	499.083	499.083	499.083	499.083	499.083	499.083	498.252	1.585
2-Propenoic acid, 2-[(trimethylsilyl)oxy]-, trimethylsilyl ester	392.197	391.538	392.831	392.316	392.831	392.831	391.251	392.831	392.831	392.576	392.805	392.472	392.831	392.688	392.831	392.831	392.773	1.58
Succinic semialdehyde (1MEOX) (1TMS) BP_M000397_A118003-101-x1[NA]_NA_1182,03_TRUE_VAR5_ALK	478.419	477.866	478.356	478.405	478.356	478.356	477.678	476.867	478.208	478.045	478.213	478.298	477.014	478.235	478.356	478.356	478.356	1.552
*Unknown#bth-pae-013_M000000_A116014-101-x1[NA]_NA_1158,99_PRED_VAR5_ALK	471.938	471.569	470.596	471.947	470.773	470.418	471.394	471.022	471.458	471.638	471.659	471.705	470.996	471.56	471.62	471.205	471.657	1.529
*Unknown#bth-pae-001_M000000_A097001-101-x1[NA]_NA_959,45_PRED_VAR5_ALK	301.382	301.962	301.962	300.971	300.606	301.962	301.962	301.962	300.815	301.629	302.134	301.967	301.962	301.72	301.962	301.962	301.962	1.528
*Nonane, 2,6-dimethyl-	330.784	331.883	331.883	331.309	332.184	330.661	332.073	331.883	331.883	332.058	331.936	331.883	331.023	331.766	331.883	331.883	332.143	1.523
Glucopyranose [-H20] (4TMS)_M000040_A177004-101-xxx_NA_1755,94_TRUE_1791,90_MOSYS_PRED_VAR5_ALK	1350.57	1349.12	1350.26	1350.57	1349.7	1350.24	1350.53	1350.57	1350.19	1350.57	1350.57	1350.57	1350.57	1350.63	1350.57	1350.19	1350.57	1.51
Pyrene, 1,9-dimethyl-	1558.54	1557.13	1557.13	1558.54	1558.54	1557.2	1557.17	1557.03	1558.54	1558.54	1558.54	1558.54	1558.54	1558.54	1558.54	1558.54	1558.54	1.51
Methane, trimethoxy-	539.222	540.731	540.731	540.731	540.731	540.731	540.731	540.731	540.731	540.731	540.731	539.945	540.731	540.731	540.731	540.731	540.731	1.509
Tridecane	326.523	325.026	325.026	325.026	325.026	325.026	325.026	325.026	325.026	325.026	325.026	325.026	325.026	325.026	325.026	325.026	325.497	1.497
Tridecane	326.523	325.026	325.026	325.026	325.026	325.026	325.026	325.026	325.026	325.026	325.026	325.026	325.026	325.026	325.026	325.026	325.497	1.497
Tridecane	326.523	325.026	325.026	325.026	325.026	325.026	325.026	325.026	325.026	325.026	325.026	325.026	325.026	325.026	325.026	325.026	325.497	1.497
L-Glutamic acid, bis(trimethylsilyl) ester	779.623	779.83	780.684	779.724	779.657	779.657	779.198	780.464	779.54	779.475	779.47	779.348	780.205	779.672	779.657	780.431	779.657	1.486
Unknown#bth-pae-008_M000000_A103003-101-xxx_NA_1019,45_PRED_1018,72_MOSYS_PRED_VAR5_ALK	337.249	337.249	337.249	337.249	337.249	337.249	337.249	335.777	337.249	337.249	337.249	337.249	337.249	337.249	337.249	336.132	337.249	1.472
Unknown#bth-pae-008_M000000_A103003-101-xxx_NA_1019,45_PRED_1018,72_MOSYS_PRED_VAR5_ALK	337.249	337.249	337.249	337.249	337.249	337.249	337.249	335.777	337.249	337.249	337.249	337.249	337.249	337.249	337.249	336.132	337.249	1.472
L-Isoleucine, 2TMS derivative	580.91	580.752	580.862	581.003	580.237	579.948	580.452	580.63	580.899	580.797	581.386	581.386	580.899	581.354	581.386	580.96	581.386	1.438
Benzenecarbothioic acid, 2,4,6-triethyl-, S-(2-phenylethyl) ester	537.507	537.507	537.507	537.507	537.507	537.507	537.507	537.507	537.507	537.507	537.507	537.507	537.507	536.078	537.507	536.264	537.507	1.429
1,3-Dipentyl-heptabarbital	1319.04	1319.45	1318.05	1318.24	1318.79	1318.03	1318.13	1318.09	1318.13	1319.02	1319.3	1319.4	1318.6	1318.88	1319.04	1318.82	1318.73	1.42
Leucine (2TMS)_M000025_A129002-101-xxx_NA_1264,43_TRUE_1282,60_MOSYS_TRUE_VAR5_ALK	560.846	560.594	560.304	560.907	559.999	559.552	560.294	560.371	560.713	560.693	560.76	560.602	560.53	560.917	560.964	560.504	560.964	1.412
L-Glutamic acid, 3TMS derivative	854.247	854.156	854.246	854.166	854.011	854.303	854.069	854.353	854.262	854.883	854.747	854.779	853.534	853.529	853.485	853.485	853.644	1.398
L-Glutamic acid, 3TMS derivative	854.247	854.156	854.246	854.166	854.011	854.303	854.069	854.353	854.262	854.883	854.747	854.779	853.534	853.529	853.485	853.485	853.644	1.398
NA_M000000_A118006-101-xxx_NA_1189,63_TRUE_1197,38_MOSYS_PRED_VAR5_ALK	487.544	487.061	487.562	487.562	486.269	487.562	487.562	487.562	487.562	487.494	487.631	487.379	486.392	487.537	487.562	486.446	487.319	1.362
Valine (2TMS)_M000030_A122001-101-xxx_NA_1207,1_TRUE_1227,10_MOSYS_TRUE_VAR5_ALK	510.052	509.686	508.755	510.08	508.917	510.106	509.453	509.109	509.931	509.914	510.011	509.882	509.254	510.058	510.106	509.259	509.909	1.351
Dodecane	488.466	488.06	487.183	488.401	487.411	487.152	487.898	487.517	487.917	488.117	488.098	488.107	487.484	488.04	488.093	487.713	488.192	1.314
*Benzenamine, N-ethyl-	431.69	430.883	431.957	431.558	431.957	431.957	430.68	431.957	431.611	431.771	431.983	431.731	431.957	431.862	431.957	431.957	431.894	1.303
L-Valine, TMS derivative	391.066	390.152	391.172	390.99	391.172	391.172	389.911	391.172	390.732	390.9	391.207	391.182	391.172	391.068	391.172	391.172	391.172	1.296
*Trehalose (8TMS)	1550.42	1550.16	1550.54	1550.54	1550.23	1550.53	1550.32	1550.21	1550.38	1550.54	1550.39	1550.44	1550.85	1549.58	1550.54	1550.87	1550.54	1.29
Pentanoic acid, 3-methyl-2-[(trimethylsilyl)oxy]-, trimethylsilyl ester	491.184	490.585	491.161	491.145	491.161	491.161	490.437	489.904	491	491	491.164	491.161	489.9	491.077	491.161	489.961	491.065	1.284
Dodecane, 6-methyl-	500.987	500.987	500.987	501.349	500.987	500.071	500.987	500.987	500.987	500.987	500.987	500.987	500.987	500.987	500.987	500.987	501.059	1.278
*Adenosine, 4TMS derivative	1482.56	1482.36	1482.42	1482.47	1482.43	1482.45	1482.55	1482.35	1482.44	1482.56	1482.49	1482.43	1483.34	1483.26	1483.34	1483.23	1482.07	1.27
d-Proline, N-methoxycarbonyl-, pentyl ester	751.875	751.77	751.992	751.9	751.722	751.913	751.756	751.877	751.687	751.807	751.726	751.683	751.872	752.949	752.949	752.949	751.705	1.266
Unknown#sst-cgl-008_M000000_A124007-101-x1[NA]_NA_1238,44_PRED_VAR5_ALK	556.01	555.686	555.394	556.049	555.034	556.291	555.374	555.298	555.659	555.659	555.671	555.711	555.772	556.291	556.291	555.552	556.291	1.257
Sucrose, 8TMS derivative	1550.42	1550.16	1549.59	1549.59	1550.23	1550.53	1550.32	1550.21	1550.16	1549.59	1550.27	1549.29	1549.51	1549.58	1549.59	1549.63	1549.59	1.24
*Isovaleric acid, 2-oxo- (1MEOX) (1TMS) MP_M000449_A116004-101-x1[NA]_NA_1095,76_TRUE_VAR5_ALK	412.355	411.567	412.566	412.266	412.566	412.566	411.395	412.566	412.262	412.395	412.634	412.438	412.566	412.481	412.566	412.566	412.566	1.239
*3-Methyl-2-oxopentanoic-acid_2_1MeOX_1TMS_M000000_A119010-101-x1[NA]_NA_1189,12_PRED_VAR5_ALK	495.285	494.818	495.134	495.283	494.133	495.134	494.512	494.046	495.046	495.029	495.166	495.088	494.115	495.072	495.134	494.131	495.134	1.239
*Butanoic acid, 2-hydroxy- (2TMS)_M000888_A111002-101-x1[NA]_NA_1111,63_TRUE_VAR5_ALK	428.488	427.733	428.651	428.371	428.651	428.651	427.573	428.651	428.251	428.61	428.806	428.489	428.651	428.605	428.651	428.651	428.518	1.233
Dodecane, 2,7,10-trimethyl-	611.17	610.931	610.952	611.725	610.566	610.494	610.629	611.07	610.896	610.907	610.915	610.802	611.07	611.016	611.07	610.899	611.242	1.231
Sarcosine ethyl ester hydrochloride	491.982	491.982	491.982	491.982	491.982	491.982	491.982	491.982	491.982	491	491.982	491.982	491.982	492.213	491.982	491.982	491.065	1.213
Pyridine, 1-oxide	496.328	496.328	496.328	496.328	496.328	496.328	496.297	496.328	496.363	496.011	496.853	496.868	496.328	496.191	496.328	495.657	496.328	1.211
*2-Ketoisocaproic acid (1TMS)	506.991	506.566	505.788	506.997	505.85	506.869	506.314	505.889	506.754	506.732	506.833	506.778	506.218	506.79	506.869	506.048	506.869	1.209
Cyclopentasiloxane, decamethyl-	463.917	463.917	462.783	463.917	463.121	463.917	463.515	463.291	463.814	463.917	463.988	463.811	463.167	463.906	463.917	463.387	463.917	1.205
3-Pyridinol, TMS derivative	435.796	435.35	435.796	436.031	435.796	435.796	434.98	435.796	435.673	435.683	435.904	435.986	435.796	435.768	435.796	435.796	436.172	1.192
Decane, 2,3,5,8-tetramethyl-	562.049	561.774	561.525	562.08	561.254	560.895	561.479	561.661	561.743	561.728	561.745	561.702	561.649	561.899	561.941	561.569	561.687	1.185
1-(p-Methoxyphenyl)-2-phenylbenzimidazole	564.029	563.743	563.569	563.278	563.108	563.076	563.39	563.154	563.147	563.61	563.259	563.326	563.191	562.852	563.191	562.882	562.949	1.177
*Butanedioic acid, 2TMS derivative	594.619	594.405	594.352	594.688	593.969	593.743	594.219	594.269	594.878	594.347	594.349	594.365	594.527	594.787	594.878	594.51	593.987	1.135
Glucose-6-phosphate (1MEOX) (6TMS) MP_M000513_A233002-101-xxx_NA_2307,34_TRUE_2370,77_MOSYS_PRED_VAR5_ALK	1329.58	1329.46	1329.44	1329.56	1329.41	1329.48	1329.48	1329.33	1329.37	1329.42	1329.51	1329.44	1330.21	1330.29	1330.46	1329.91	1330.46	1.13
DL-Phenylalanine, TMS derivative	793.76	793.657	793.657	793.929	793.657	793.657	793.657	793.657	793.756	793.657	793.587	793.528	793.657	793.69	793.657	794.633	793.657	1.105
Phenol, 2-methoxy-5-[(1,2,3,4-tetrahydro-6,7-dimethoxy-2-methyl-1-isoquinolinyl)methyl]-, (S)-	640.89	640.734	641.104	640.853	640.907	640.658	640.897	641.578	640.836	640.922	641.722	640.958	641.265	640.665	640.631	640.937	641.188	1.091
Bisphenol A monomethyl ether, TMS derivative	564.029	563.743	563.569	563.278	563.108	563.076	563.39	563.378	563.923	563.61	563.786	563.326	563.565	563.571	563.666	563.64	562.949	1.08
Ethyl pipecolinate	551.744	551.424	551.424	551.424	551.424	551.424	550.966	551.424	551.341	551.301	551.41	551.376	550.682	551.394	551.424	550.708	551.424	1.062
Glycine (3TMS)_M000031_A133001-101-xxx_NA_1302,5_TRUE_1317,50_MOSYS_TRUE_VAR5_ALK	592.985	592.735	592.754	593.025	592.208	591.986	592.43	592.658	592.743	592.686	592.736	592.64	592.59	592.81	592.835	592.672	592.835	1.039
4-Hydroxybutanoic acid, 2TMS derivative	524.564	524.103	524.218	524.427	524.218	524.218	523.797	524.218	524.218	524.141	524.258	524.114	524.218	524.176	524.218	523.53	524.218	1.034
*D-Limonene	343.708	342.732	342.732	342.732	342.732	342.732	342.816	342.732	342.732	342.732	342.732	342.732	342.732	342.732	342.732	342.732	342.732	0.976
D-Mannose, 2,3,4,5-tetrakis-O-(trimethylsilyl)-, O-methyloxime, 6-[bis(trimethylsilyl) phosphate]	1329.58	1329.46	1329.44	1329.56	1329.41	1329.48	1329.48	1329.33	1329.37	1329.42	1329.51	1329.44	1330.21	1330.29	1330.05	1329.91	1330.05	0.96
2-Butenedioic acid, (Z)-, 2TMS derivative	588.029	587.774	587.773	588.065	587.349	587.112	587.5	587.659	587.777	587.644	587.803	587.725	587.733	587.904	587.983	587.736	587.51	0.953
2,2-Dimethylpropane-1,3-diol, O,O'-bis(trimethylsilyl)-	387.956	387.016	387.518	387.629	387.518	387.518	387.183	387.518	387.079	387.551	387.551	387.572	387.518	387.456	387.518	387.518	387.918	0.94
*4-Methyl-1,2-bis(trimethylsilyloxy)pentane	519.928	519.583	519.048	519.913	518.989	519.741	519.318	519.315	519.62	519.713	519.721	519.399	519.121	519.666	519.741	519.245	519.584	0.939
4-Pyrimidinamine, N-(trimethylsilyl)-2-[(trimethylsilyl)oxy]-	778.029	777.911	778.18	778.1	777.962	778.076	777.939	777.985	778.232	778.212	778.213	778.294	778.535	778.428	778.423	778.554	777.671	0.883
2-Bromo dodecane	598.357	598.357	598.357	598.357	598.357	597.484	598.357	598.357	598.357	598.357	598.357	598.357	598.357	598.357	598.357	598.357	597.916	0.873
2-Piperidinecarboxylic acid (2TMS)_M000528_A137004-101-x1[NA]_NA_1365,15_TRUE_VAR5_ALK	777.19	776.995	777.289	777.19	776.975	777.195	776.915	777.128	777.28	777.245	777.187	777.05	777.289	777.275	777.392	777.705	776.836	0.869
5-(Piperidin-1-ylmethyl)-3-pyridin-3-yl-5,6-dihydro-4H-1,2,4-oxadiazine	362.01	361.142	361.142	361.142	361.708	361.142	361.142	361.142	361.142	361.142	361.142	361.142	361.142	361.142	361.142	361.142	361.142	0.868
Undecane, 3,7-dimethyl-	602.95	602.693	602.692	602.936	602.321	602.095	602.457	602.79	602.672	602.708	602.687	602.578	602.647	602.848	602.89	602.71	602.438	0.855
Glutamine, DL- (3TMS)_M000032_A178001-101-xxx_NA_1766,72_TRUE_1786,50_MOSYS_TRUE_VAR5_ALK	968.149	968.897	968.113	968.1	968.13	968.253	968.065	968.151	968.466	968.37	968.341	968.292	968.541	968.591	968.897	968.615	968.897	0.832
*L-Methionine, 2TMS derivative	774.331	774.117	774.24	774.311	774.075	774.33	773.994	774.205	774.239	774.21	774.24	774.384	774.473	774.462	774.694	774.788	774.694	0.794
*Butanoic acid, 2-amino- (1TMS)	340.954	340.954	340.954	340.954	340.954	340.954	340.954	340.954	340.456	340.891	341.16	341.218	340.954	340.785	340.954	340.954	340.954	0.762
L-Lysine, 3TMS derivative	919.169	919.046	919.449	918.962	918.962	918.962	918.687	918.962	918.911	918.933	918.958	918.859	919.023	918.915	918.962	919.33	918.962	0.762
Cycloheptasiloxane, tetradecamethyl-	738.156	738.05	738.335	738.25	737.849	738.115	737.84	738.254	737.872	737.974	737.925	737.974	738.156	738.097	738.115	738.593	738.115	0.753
Cycloheptasiloxane, tetradecamethyl-	738.156	738.05	738.335	738.25	737.849	738.115	737.84	738.254	737.872	737.974	737.925	737.974	738.156	738.097	738.115	738.593	738.115	0.753
Uridine (4TMS)_M000273_A246006-101-xxx_NA_2455,91_TRUE_2526,74_MOSYS_PRED_VAR5_ALK	1386.5	1386.33	1386.29	1386.38	1386.38	1386.49	1386.53	1386.22	1386.4	1386.4	1386.52	1386.35	1386.89	1386.94	1386.89	1386.72	1386.89	0.72
Hexasiloxane, tetradecamethyl-	674.343	674.183	674.407	674.381	674.124	674.274	674.137	674.297	674.183	674.135	674.183	673.707	674.224	674.221	674.183	674.249	#N/A	#N/A
Diethylene glycol, isobutyl ether, trimethylsilyl ether	615.685	615.463	615.807	615.711	615.126	615.47	615.141	615.431	615.47	615.314	615.47	615.372	615.391	615.488	615.47	615.423	615.174	0.681
L-Lysine, 4TMS derivative	1071.51	1071.32	1071.43	1071.46	1071.3	1071.38	1071.41	1071.34	1071.4	1071.4	1071.48	1071.35	1071.7	1071.52	1071.73	1071.43	1071.05	0.68
*Lumichrome (2MEOX)_M000872_A133011-101-x1[NA]_NA_1332,56_TRUE_VAR5_ALK	617.654	617.337	617.475	617.683	617.026	617.021	617.142	617.31	617.373	617.211	617.248	617.216	617.351	617.403	617.474	617.312	617.474	0.662
*3,7-dioxa-2,8-disilanonane, 2,2,8,8-tetramethyl-5,5-bis[[(trimethylsilyl)oxy]methyl]-	768.823	768.569	768.44	768.75	768.649	768.674	768.173	768.618	768.547	768.37	768.449	768.395	768.749	768.732	768.772	768.75	768.321	0.65
D278931_M000000_A278013-101-xxx_NA_2788,69_TRUE_2876,10_MOSYS_PRED_VAR5_ALK	1543.23	1543.16	1543.14	1543.21	1543.07	1543.07	1543.05	1542.99	1543.12	1543.16	1543.16	1543.1	1543.36	1543.58	1543.38	1543.24	1542.93	0.65
NA_M000000_A140006-101-xxx_NA_1366,21_PRED_1382,75_MOSYS_PRED_VAR5_ALK	647.497	647.289	647.248	647.488	647.325	647.201	647.019	647.3	647.204	647.224	647.214	647.143	647.319	647.304	647.325	647.362	646.853	0.644
Xylobiose, D- (1MEOX) (6TMS) BP2_M000720_A242004-101-xxx_NA_2422,7_PRED_2491,88_MOSYS_PRED_VAR5_ALK	1332.96	1332.96	1332.96	1332.96	1332.96	1332.4	1332.82	1332.96	1332.57	1332.61	1332.64	1332.59	1332.96	1333.03	1332.96	1332.77	1332.96	0.63
{[2-(Trichloromethyl)-1,3-dioxane-5,5-diyl]bis(methanediyloxy)}bis(trimethylsilane)	694.855	694.651	694.978	694.867	694.526	694.745	694.473	694.853	694.557	694.572	694.592	694.508	694.708	694.613	694.639	694.736	694.354	0.624
*Glucose-6-phosphate (1MEOX) (6TMS) BP_M000513_A235002-101-x1[NA]_NA_2328,97_TRUE_VAR5_ALK	1340.26	1340.16	1340.17	1340.25	1340.15	1340.19	1340.21	1340.04	1340.11	1340.19	1340.23	1340.18	1340.51	1340.62	1340.66	1340.38	1340.66	0.62
Citric acid, 4TMS derivative	1006.44	1006.25	1006.25	1006.33	1006.11	1006.2	1006.04	1006.17	1006.06	1006.13	1006.11	1006.04	1006.12	1006.04	1006.3	1006.23	1005.82	0.62
*Ethanol, 2-butoxy-, phosphate (3:1)	1353.44	1353.37	1353.39	1353.47	1353.37	1353.35	1353.36	1353.76	1353.36	1353.43	1353.45	1353.43	1353.72	1353.73	1353.76	1353.67	1353.15	0.61
N-Ethyl-2-carbethoxyazetidine	855.507	855.507	855.507	855.507	855.507	855.507	855.507	855.507	855.507	855.507	855.507	855.507	854.907	855.507	855.507	855.507	855.507	0.6
Proline [+CO2] (2TMS)_M000029_A159001-101-x1[NA]_NA_1583,16_TRUE_VAR5_ALK	824.317	824.335	824.479	824.394	824.2	824.334	824.005	824.296	824.13	824.049	823.887	824.215	824.355	824.276	824.225	824.442	824.225	0.592
{4-Methoxy-2-[(trimethylsilyl)oxy]phenyl}{2-[(trimethylsilyl)oxy]phenyl}methanone	690.259	690.07	689.989	690.247	689.989	689.989	689.839	690.378	690.029	689.989	690.006	689.789	690.164	689.97	689.989	690.18	689.989	0.589
Adipic acid (2TMS)_M000471_A151006-101-x1[NA]_NA_1500,92_TRUE_VAR5_ALK	758.379	758.216	758.524	758.37	758.124	758.347	758.032	758.419	758.179	758.195	758.182	758.139	758.293	758.253	758.26	758.339	757.949	0.575
*Stearic acid (1TMS)	1259.09	1259.02	1258.94	1258.94	1258.89	1258.89	1258.83	1258.78	1259.02	1258.89	1258.97	1258.89	1259.05	1258.52	1259.05	1258.96	1258.84	0.57
D-(-)-Ribofuranose, tetrakis(trimethylsilyl) ether (isomer 1)	1452.5	1452.5	1452.5	1452.5	1452	1452.09	1452.5	1451.96	1452.5	1452.5	1452.5	1452.13	1452.46	1452.53	1452.5	1452.47	1452.5	0.57
NA_M000000_A145008-101-xxx_NA_1447,39_PRED_1467,98_MOSYS_PRED_VAR5_ALK	725.912	725.696	725.969	725.901	725.686	725.816	725.608	725.883	725.613	725.75	725.653	725.404	725.791	725.708	725.75	725.794	725.587	0.565
Phosphoric acid, 3-(methoxyimino)-2-[(trimethylsilyl)oxy]propyl bis(trimethylsilyl) ester, (±)-	934.252	934.06	934.481	934.487	934.217	934.217	934.073	933.922	934.064	934.082	934.111	934.217	934.279	934.217	934.217	934.437	934.217	0.565
*Nonanoic acid, TMS derivative	633.186	632.948	633.233	633.177	632.724	632.832	632.745	633.034	632.919	632.871	632.836	632.834	632.971	632.957	632.961	632.959	632.672	0.561
*Fumaric acid (2TMS)	622.756	622.513	622.776	622.76	622.381	622.483	622.377	622.579	622.507	622.503	622.482	622.425	622.573	622.563	622.58	622.617	622.221	0.555
*Uracil (2TMS)_M000456_A136001-101-x1[NA]_NA_1335,93_TRUE_VAR5_ALK	620.238	620.011	620.179	620.255	619.7	619.759	619.769	620.018	619.967	619.919	619.946	619.895	619.986	620.043	620.051	619.977	619.724	0.555
Methyl (2R,3R,4S)-3-(tert-butyldimethylsilyloxy)-2,4-dimethylhexanoate	1306.08	1306.08	1306.08	1306.08	1306.08	1306.08	1306.08	1306.08	1306.08	1306.08	1306.08	1306.08	1306.08	1306.06	1306.08	1306.08	1305.53	0.55
2-Piperidinecarboxylic acid (2TMS)_M000528_A137004-101-xxx_NA_1365,15_TRUE_1381,64_MOSYS_PRED_VAR5_ALK	840.183	840.069	840.255	840.217	840.438	840.147	840.105	840.091	840.116	840.16	840.133	840.099	840.205	840.213	840.213	840.237	839.898	0.54
Ribulose-5-phosphate (1MEOX) (5TMS) MP_M000769_A212012-101-x1[NA]_NA_2102,51_TRUE_VAR5_ALK	1209.21	1208.67	1209.21	1209.21	1209.21	1209.21	1209.21	1209.21	1209.21	1209.21	1209.05	1209.21	1209.21	1209.14	1209.21	1209.01	1209.21	0.54
*Nicotinamide (1TMS)_M000271_A150004-101-x1[NA]_NA_1489,26_TRUE_VAR5_ALK	736.795	736.678	736.96	736.892	736.607	736.736	736.423	736.732	736.614	736.593	736.538	736.594	736.78	736.736	736.724	736.836	736.724	0.537
Dodecanol_1TMS_M000000_A157019-101-x1[NA]_NA_1564,92_PRED_VAR5_ALK	806.199	806.025	806.314	806.204	805.989	806.154	805.893	806.234	805.979	805.974	806.003	805.943	806.092	806.042	806.057	806.163	805.785	0.529
*Pyrrole-2-carboxylic acid (2TMS)	634.887	634.66	634.706	634.909	634.382	634.408	634.429	634.858	634.597	634.594	634.556	634.533	634.75	634.698	634.706	634.668	634.706	0.527
Heptadecane, 2,6,10,15-tetramethyl-	784.407	784.212	784.495	784.382	784.117	784.272	784.064	784.415	784.154	784.168	784.195	784.148	784.33	784.325	784.348	784.378	783.969	0.526
Ethanolamine, 2TMS derivative	335.252	335.252	335.252	335.252	335.252	335.252	335.252	335.777	335.252	335.252	335.252	335.252	335.252	335.252	335.252	335.252	335.252	0.525
Siloxane_M000870_A271010-101-xxx_NA_2716,61_PRED_2800,43_MOSYS_PRED_VAR5_ALK	877.445	877.478	877.667	877.552	877.266	877.466	877.279	877.563	877.314	877.385	877.433	877.379	877.491	877.374	877.479	877.549	877.149	0.518
Siloxane_M000870_A271010-101-xxx_NA_2716,61_PRED_2800,43_MOSYS_PRED_VAR5_ALK	877.445	877.478	877.667	877.552	877.266	877.466	877.279	877.563	877.314	877.385	877.433	877.379	877.491	877.374	877.479	877.549	877.149	0.518
Pyridine, 3-methyl-2,6-diphenyl-	844.827	844.849	844.914	844.777	844.615	844.849	844.546	844.849	844.849	844.768	844.714	845.063	844.849	844.806	844.849	844.849	844.849	0.517
Hexadecane	829.406	829.231	829.488	829.403	829.232	829.332	829.088	829.392	829.172	829.225	829.213	829.164	829.316	829.269	829.291	829.403	828.975	0.513
Tridecane, 2-methyl-	748.259	748.072	748.342	748.259	747.99	748.093	747.908	748.29	747.994	748.024	748.037	747.96	748.099	748.053	748.08	748.179	747.83	0.512
Tridecane, 2-methyl-	748.259	748.072	748.342	748.259	747.99	748.093	747.908	748.29	747.994	748.024	748.037	747.96	748.099	748.053	748.08	748.179	747.83	0.512
Glucose-6-phosphate, 2-amino-2-deoxy- (1MEOX) (6TMS) BP_M000771_A236010-101-x1[NA]_NA_2358,48_TRUE_VAR5_ALK	1355.04	1355.04	1355.04	1355.04	1354.68	1354.68	1354.73	1355.04	1355.04	1354.78	1354.93	1354.79	1355.04	1355.18	1355.04	1355.07	1355.04	0.5
*Pyrophosphate (4TMS)	895.046	894.808	894.999	895.035	894.776	894.911	894.837	894.827	894.593	894.978	894.72	894.681	894.65	895.087	894.978	895.08	894.888	0.494
*2-(Methylmercapto)benzothiazole	844.755	844.613	844.914	844.777	844.571	844.695	844.695	844.695	844.695	844.768	844.644	845.063	844.709	844.695	844.695	844.695	844.695	0.492
Cyclodecasiloxane, eicosamethyl-	1026.7	1026.32	1026.66	1026.68	1026.48	1026.59	1026.44	1026.59	1026.62	1026.55	1026.59	1026.21	1026.59	1026.55	1026.62	1026.62	1026.62	0.49
Carbodiimide (2TMS)_M000836_A100005-101-xxx_NA_953,17_PRED_949,14_MOSYS_PRED_VAR5_ALK	627.201	626.975	627.161	627.228	626.742	626.81	626.806	627.003	626.956	626.921	626.992	626.862	626.954	627.009	626.992	626.954	626.992	0.486
Cyclooctasiloxane, hexadecamethyl-	880.657	880.49	880.657	880.664	880.657	880.723	880.657	880.695	880.657	880.595	880.56	880.56	880.677	880.641	880.657	880.749	880.263	0.486
4-tert-Octylphenol, TMS derivative	869.055	868.722	869.055	868.569	868.731	869.055	868.726	868.915	868.745	868.784	868.756	869.055	869.055	868.944	869.055	869.055	868.608	0.486
Unknown#sst-cgl-040_M000000_A163017-101-xxx_NA_1628,54_PRED_1658,15_MOSYS_PRED_VAR5_ALK	863.079	862.911	863.202	863.074	862.889	863.052	862.851	863.089	862.921	862.748	862.724	862.906	863.202	863.154	863.202	863.035	863.202	0.478
Butanoic acid, 4-methylthio-2-oxo- (1MEOX) (1TMS) MP_M000923_A145013-101-x1[NA]_NA_1454,41_TRUE_VAR5_ALK	719.835	719.636	720.013	719.836	719.579	719.78	719.66	719.938	719.578	719.661	719.597	719.538	719.734	719.666	719.66	719.754	719.66	0.475
Malic acid (3TMS)_M000065_A149001-101-xxx_NA_1478,99_TRUE_1503,50_MOSYS_TRUE_VAR5_ALK	750.456	750.267	750.576	750.453	750.23	750.423	750.107	750.462	750.246	750.253	750.266	750.235	750.436	750.356	750.379	750.494	750.379	0.469
*NA_M000000_A148003-101-xxx_NA_1464,64_PRED_1486,09_MOSYS_PRED_VAR5_ALK	738.51	738.581	738.767	738.794	738.462	738.51	738.51	738.51	738.45	738.33	738.459	738.386	738.563	738.51	738.51	738.593	738.51	0.464
*Myristic acid, TMS derivative	1012	1011.73	1011.84	1011.88	1011.69	1011.86	1011.73	1011.8	1011.68	1011.7	1011.75	1011.7	1011.84	1011.88	1011.92	1011.74	1011.54	0.46
Ornithine-1,5-lactam (2TMS)_M000728_A147003-101-x1[NA]_NA_1454,09_PRED_VAR5_ALK	723.077	722.838	723.142	722.971	722.686	722.857	722.971	722.883	722.723	722.739	722.768	722.75	722.835	722.835	722.971	722.859	722.971	0.456
β-Alanine, 3TMS derivative	697.212	697.001	697.291	697.209	696.891	697.021	696.844	697.156	696.929	696.95	696.98	696.892	697.073	697.024	697.046	697.151	697.046	0.447
L-Threonine, 3TMS derivative	665.915	665.686	665.965	665.906	665.523	665.682	665.528	665.864	665.649	665.63	665.684	665.616	665.82	665.787	665.804	665.726	665.804	0.442
*Ribulose-5-phosphate (1MEOX) (5TMS) BP_M000769_A211015-101-x1[NA]_NA_2087,72_TRUE_VAR5_ALK	1199.52	1199.36	1199.36	1199.46	1199.38	1199.41	1199.39	1199.27	1199.36	1199.08	1199.4	1199.45	1199.52	1199.44	1199.5	1199.48	1199.5	0.44
5'-Methylthioadenosine, 3TMS derivative	1557.24	1557.13	1557.13	1557.19	1557.14	1557.2	1557.17	1557.03	1557.1	1557.11	1557.14	1557.02	1557.13	1557.46	1557.08	1557.41	1557.08	0.44
Indole-3-pyruvic acid (1MEOX) (2TMS) MP_M001050_A219009-101-x1[NA]_NA_2197,08_TRUE_VAR5_ALK	1246.87	1246.47	1246.57	1246.61	1246.49	1246.53	1246.57	1246.43	1246.58	1246.68	1246.68	1246.64	1246.79	1246.78	1246.87	1246.74	1246.87	0.44
Diethanolamine, 3TMS derivative	706.492	706.284	706.543	706.492	706.2	706.147	706.194	706.359	706.174	706.177	706.224	706.211	706.246	706.186	706.194	706.297	706.109	0.434
*Thymine (2TMS)	675.932	675.732	676.036	675.953	675.818	675.943	675.838	675.876	675.661	675.632	675.686	675.68	675.817	675.767	675.776	675.848	675.607	0.429
Siloxane_M000870_A219007-101-xxx_NA_2188,76_PRED_2246,28_MOSYS_PRED_VAR5_ALK	948.719	948.521	948.708	948.709	948.543	948.681	948.591	948.693	948.502	948.56	948.68	948.538	948.662	948.564	948.688	948.692	948.31	0.409
*Butylated Hydroxytoluene, TMS derivative	913.85	913.695	913.954	913.843	913.629	913.735	913.577	913.82	913.545	913.6	913.706	913.569	913.672	913.636	913.706	913.748	913.65	0.409
*Alanyl-alanine (2TMS)	841.046	840.861	841.132	841.034	841.035	841.014	840.751	840.974	840.895	840.892	840.903	840.888	841.116	841.064	841.085	841.156	841.085	0.405
*Homoserine (3TMS)	718.003	717.799	718.107	718.04	717.72	717.954	717.775	718.018	717.727	717.816	717.779	717.704	717.9	717.84	717.859	717.928	717.859	0.403
*Palmitic Acid (1TMS)	1141	1140.81	1140.89	1140.9	1140.83	1140.76	1140.76	1140.6	1140.84	1140.84	1140.79	1140.74	1140.76	1140.74	1140.78	1140.74	1140.74	0.4
*Uridine 5'-monophosphate (5TMS)	1603.27	1603.16	1602.99	1603.23	1603.06	1603.33	1603.38	1603.07	1602.98	1603.19	1603.07	1603.17	1603.09	1603.16	1603.14	1603.05	1603.14	0.4
Silane, diethylbutoxypentyloxy-	883.653	883.445	883.71	883.491	883.419	883.541	883.508	883.491	883.444	883.531	883.607	883.522	883.756	883.811	883.491	883.491	883.491	0.392
*NA_M000000_A352002-101-x1[NA]_NA_3516,3_PRED_VAR5_ALK	1918.46	1918.12	1918.13	1918.31	1918.26	1918.43	1918.43	1918.31	1918.17	1918.33	1918.36	1918.21	1918.38	1918.5	1918.51	1918.29	1918.51	0.39
*NA_M000000_A352002-101-x1[NA]_NA_3516,3_PRED_VAR5_ALK	1918.46	1918.12	1918.13	1918.31	1918.26	1918.43	1918.43	1918.31	1918.17	1918.33	1918.36	1918.21	1918.38	1918.5	1918.51	1918.29	1918.51	0.39
N-Acetyl-D-galactosamine, (isomer 2), 4TMS derivative	1194.81	1194.61	1194.71	1194.76	1194.6	1194.78	1194.87	1194.78	1194.64	1194.95	1194.92	1194.66	1194.77	1194.76	1194.78	1194.99	1194.78	0.39
*Dihydroxyacetone phosphate (1MEOX) (3TMS)	961.137	960.955	961.122	961.122	961.045	961.138	961.054	961.077	961.12	961.132	961.147	961.091	961.187	961.198	961.336	961.259	961.336	0.381
*Tryptophan, 3TMS derivative	1259.66	1259.28	1259.38	1259.66	1259.66	1259.56	1259.52	1259.43	1259.66	1259.44	1259.42	1259.66	1259.46	1259.59	1259.66	1259.59	1259.66	0.38
*Glyceryl-glycoside TMS ether	1311.79	1311.67	1311.63	1311.74	1311.7	1311.7	1311.71	1311.41	1311.6	1311.69	1311.68	1311.59	1311.72	1311.74	1311.77	1311.65	1311.77	0.38
Benzene, 1,1'-(1,1,2,2,3,3-hexafluoro-1,3-propanediyl)bis[2,3,4,5,6-pentafluoro-	540.013	540.013	540.013	540.322	540.013	540.013	540.013	540.013	540.013	540.013	540.013	539.945	540.013	540.013	540.013	540.013	540.013	0.377
Phenylalanine, 2TMS derivative	860.714	860.508	860.76	860.649	860.532	860.695	860.44	860.703	860.546	860.569	860.589	860.561	860.704	860.748	860.781	860.815	860.781	0.375
*Butanoic acid, 4-amino- (3TMS)	783.07	782.84	783.019	783.036	782.726	782.903	782.697	782.984	782.8	782.77	782.803	782.741	782.952	782.961	782.97	782.998	782.97	0.373
Alanine [+CO2] (2TMS)_M000000_A142001-101-x1[DL-]_NA_1395,2_PRED_VAR5_ALK	669.674	669.674	669.674	669.884	669.674	669.674	669.674	669.674	669.618	669.602	669.59	669.511	669.674	669.663	669.674	669.674	669.674	0.373
Cyclononasiloxane, octadecamethyl-	995.911	995.692	995.885	995.859	995.862	995.856	995.745	995.787	995.731	995.776	995.761	995.745	995.852	995.82	995.862	995.838	995.54	0.371
Tyrosine (3TMS)_M000035_A194002-101-xxx_NA_1934,12_TRUE_1954,60_MOSYS_TRUE_VAR5_ALK	1083.28	1083.11	1083.22	1083.28	1083.15	1083.2	1083.19	1083.17	1083.16	1083.22	1083.25	1083.19	1083.35	1083.48	1083.41	1083.34	1083.41	0.37
Glucose-6-phosphate, 2-amino-2-deoxy- (1MEOX) (6TMS) MP_M000771_A236009-101-x1[NA]_NA_2346,1_TRUE_VAR5_ALK	1349.23	1349.23	1349.23	1349.01	1349.23	1349.23	1348.99	1348.86	1349.23	1348.97	1349.23	1348.97	1349.19	1349.2	1349.23	1349.12	1349.23	0.37
Cadaverine, 4TMS derivative	1031.74	1031.55	1031.68	1031.74	1031.53	1031.64	1031.64	1031.62	1031.54	1031.6	1031.6	1031.61	1031.89	1031.64	1031.69	1031.6	1031.69	0.36
Adenosine (3TMS) (Derivate not found)_M000287_A261002-101-x1[NA]_NA_2612,19_PRED_VAR5_ALK	1461.37	1461.11	1461.09	1461.27	1461.02	1461.04	1461.23	1461.3	1461.02	1461.04	1461.01	1461.04	1461.34	1461.3	1461.3	1461.28	1461.3	0.36
Phthalic acid, hept-4-yl isobutyl ester	1029.2	1029.04	1029.17	1029.19	1029.01	1029.12	1029.14	1029.06	1029.24	1029.14	1029.1	1029.14	1029.14	1029.18	1029.14	1029.19	1028.88	0.36
Methionine (1TMS)_M000018_A142007-101-x1[L-]_NA_1416,46_TRUE_VAR5_ALK	679.357	679.088	679.088	679.088	679.088	679.088	679.088	679.088	679.165	679.055	679.05	679.001	679.088	679.107	679.088	679.088	679.088	0.356
*Ribose	908.21	908.023	908.334	908.186	907.999	908.131	907.983	908.19	907.979	908.017	908.105	908.004	908.045	908.073	908.189	908.138	908.189	0.355
*Propanoic acid, 2-amino-2-methyl-3-hydroxy- (3TMS)_M000893_A137008-101-x1[NA]_NA_1375,1_TRUE_VAR5_ALK	662.633	662.633	662.633	662.633	662.633	662.633	662.633	662.746	662.393	662.543	662.585	662.567	662.633	662.6	662.633	662.665	662.633	0.353
*Pentanedioic acid, 2-(methoxyimino)-, bis(trimethylsilyl) ester	819.254	819.092	819.337	819.264	819.154	819.251	818.985	819.214	819.088	819.093	819.096	819.146	819.22	819.118	819.173	819.295	819.173	0.352
Pentadecane	976.763	976.607	976.776	976.758	976.59	976.725	976.742	976.742	976.6	976.642	976.704	976.625	976.697	976.681	976.742	976.743	976.424	0.352
Maltose (1MEOX) (8TMS) BP_M000048_A277002-101-xxx_NA_2745,49_TRUE_2845,00_MOSYS_TRUE_VAR5_ALK	1564.43	1564.25	1564.2	1564.33	1564.27	1564.39	1564.38	1564.27	1564.27	1564.36	1564.39	1564.33	1564.45	1564.55	1564.51	1564.45	1564.51	0.35
Ornithine, N2-acetyl- (4TMS)_M000409_A189020-101-xxx_NA_1965,41_TRUE_2011,81_MOSYS_PRED_VAR5_ALK	1109.51	1109.51	1109.51	1109.51	1109.51	1109.51	1109.51	1109.51	1109.43	1109.5	1109.55	1109.44	1109.5	1109.53	1109.51	1109.78	1109.51	0.35
Glutamine (4TMS)_M000032_A174008-101-x1[NA]_NA_1720,58_TRUE_VAR5_ALK	943.517	943.173	943.312	943.35	943.176	943.254	943.247	943.236	943.234	943.284	943.32	943.2	943.269	943.28	943.312	943.262	943.312	0.344
*L-Cysteine, 3TMS derivative	804.988	804.988	804.988	804.944	805.108	805.122	804.894	804.888	804.938	804.988	804.824	804.799	804.982	804.992	804.988	805.14	804.988	0.341
Phenylpyruvic acid (1MEOX) (1TMS) MP_M000572_A160002-101-x1[NA]_NA_1591,01_TRUE_VAR5_ALK	828.236	828.047	828.341	828.25	828.158	828.353	828.035	828.241	828.14	828.166	828.18	828.163	828.296	828.241	828.241	828.37	828.241	0.335
Hexanedioic acid, bis(2-ethylhexyl) ester	1346	1345.92	1345.93	1346.01	1345.93	1346.19	1346.19	1346.19	1345.87	1345.94	1345.95	1345.89	1346.16	1346.2	1346.19	1346.07	1346.19	0.33
Heneicosane, n-_M000548_A210012-101-x1[n-]_NA_2102,8_PRED_VAR5_ALK	792.115	791.971	791.991	792.166	791.991	792.023	791.991	791.991	791.852	791.871	791.849	791.991	791.991	791.955	791.991	792.092	791.839	0.327
Heneicosane, n-_M000548_A210012-101-x1[n-]_NA_2102,8_PRED_VAR5_ALK	792.115	791.971	791.991	792.166	791.991	792.023	791.991	791.991	791.852	791.871	791.849	791.991	791.991	791.955	791.991	792.092	791.839	0.327
*7-(Trimethylsilyl)-2,6-bis[(trimethylsilyl)oxy]-7H-purine	1137.38	1137.18	1137.28	1137.28	1137.24	1137.17	1137.18	1137.06	1137.19	1137.17	1137.16	1137.14	1137.17	1137.18	1137.17	1137.23	1137.17	0.32
Alanyl-alanine (2TMS)_M000937_A160013-101-x1[L-, L-]_NA_1600,7_TRUE_VAR5_ALK	1166.25	1166.07	1166.34	1166.25	1166.15	1166.16	1166.23	1166.12	1166.14	1166.18	1166.22	1166.16	1166.39	1166.35	1166.34	1166.23	1166.34	0.32
*Maltotriose (11TMS)	1931.6	1931.6	1931.6	1931.6	1931.28	1931.54	1931.54	1931.6	1931.6	1931.6	1931.6	1931.36	1931.49	1931.55	1931.6	1931.42	1931.6	0.32
*Adenine (2TMS)	1033.87	1033.75	1033.86	1033.86	1033.61	1033.72	1033.74	1033.71	1033.73	1033.71	1033.73	1033.74	1033.88	1033.83	1033.86	1033.84	1033.57	0.31
Indole-3-lactic acid, 3TMS derivative	1235.31	1235.15	1235.24	1235.27	1235.18	1235.23	1235.24	1235.14	1235.16	1235.24	1235.24	1235.17	1235.27	1235.03	1235.34	1235.24	1235.34	0.31
Glycine, di-TMS	420.195	420.195	420.195	420.195	420.195	420.195	420.195	420.195	419.886	419.937	420.126	420.099	420.195	420.115	420.195	420.195	420.195	0.309
Phosphoric acid, bis(trimethylsilyl) 2,3-bis[(trimethylsilyl)oxy]propyl ester	966.119	965.986	966.173	966.16	966.076	966.197	966.258	966.114	966.124	966.147	966.189	966.131	966.245	966.218	966.258	965.953	966.258	0.305
DL-Alanine, N-methyl-N-hexyloxycarbonyl-, decyl ester	653.552	653.552	653.847	653.552	653.552	653.552	653.552	653.552	653.552	653.552	653.552	653.552	653.552	653.552	653.552	653.552	653.552	0.295
*Glucose-6-phosphate, 2-amino-2-deoxy- (6TMS)	1363.42	1363.42	1363.42	1363.33	1363.24	1363.28	1363.32	1363.19	1363.18	1363.31	1363.32	1363.27	1363.42	1363.47	1363.42	1363.38	1363.42	0.29
Allantoin (4TMS)_M000092_A189007-101-xxx_NA_1876,44_PRED_1918,40_MOSYS_PRED_VAR5_ALK	1053.87	1053.67	1053.74	1053.86	1053.58	1053.76	1053.78	1053.75	1053.67	1053.77	1053.82	1053.73	1053.79	1053.79	1053.81	1053.73	1053.81	0.29
1-Methoxy-2-propanol, TMS derivative	351.02	351.02	351.02	350.73	351.02	351.02	351.02	351.02	351.02	350.934	351.02	351.02	351.02	350.923	351.02	351.02	351.02	0.29
*Glyceric acid-3-phosphate (4TMS)_M000105_A181003-101-x1[NA]_NA_1791,68_TRUE_VAR5_ALK	998.916	998.709	998.885	998.902	998.962	998.782	998.743	998.688	998.694	998.726	998.765	998.705	998.891	998.755	998.812	998.715	998.812	0.274
N,N'-Diacetylchitobiose (1MEOX) (6TMS) MP_M001136_A301006-101-xxx_NA_3018,88_TRUE_3117,76_MOSYS_PRED_VAR5_ALK	1163.41	1163.41	1163.41	1163.41	1163.41	1163.47	1163.41	1163.41	1163.2	1163.25	1163.46	1163.21	1163.46	1163.35	1163.41	1163.32	1163.41	0.27
Siloxane_M000870_A259009-101-xxx_NA_2596,74_PRED_2674,59_MOSYS_PRED_VAR5_ALK	1216	1215.82	1215.93	1215.99	1215.82	1215.93	1215.98	1215.86	1215.74	1215.93	1215.91	1215.85	1215.81	1215.9	1215.9	1215.79	1215.76	0.26
1-Morpholinopropan-2-ol trifluoroacetate	990.277	990.277	990.277	990.277	990.129	990.042	990.225	990.277	990.277	990.277	990.161	990.277	990.186	990.301	990.277	990.152	990.277	0.259
*NA_M000000_A214003-101-xxx_NA_2127,28_PRED_2181,74_MOSYS_PRED_VAR5_ALK	1223.69	1223.66	1223.69	1223.77	1223.53	1223.78	1223.69	1223.53	1223.69	1223.69	1223.66	1223.69	1223.61	1223.65	1223.69	1223.59	1223.69	0.25
Benzenepropanoic acid, α-(methoxyimino)-4-[(trimethylsilyl)oxy]-, trimethylsilyl ester	1059.16	1058.97	1059.08	1059.14	1058.94	1059.04	1059.02	1058.99	1058.91	1058.98	1059.04	1058.95	1059.06	1059.08	1059.07	1059.02	1059.07	0.25
Valine, N-methyl-N-methoxycarbonyl-, octyl ester	923.293	923.082	923.31	923.259	923.107	923.24	923.067	923.212	923.061	923.131	923.131	923.088	923.187	923.149	923.192	923.231	923.192	0.249
Homocysteine (3TMS)_M000021_A167001-101-x1[NA]_NA_1662,83_TRUE_VAR5_ALK	888.266	888.227	888.412	888.271	888.194	888.308	888.232	888.436	888.26	888.316	888.325	888.278	888.427	888.395	888.436	888.395	888.436	0.242
Asparagine (3TMS)_M000013_A168001-101-x1[DL-]_NA_1666,44_TRUE_VAR5_ALK	894.239	894.036	894.144	894.144	894.055	894.218	894.023	894.144	893.999	894.05	894.067	894.03	894.151	894.051	894.144	894.195	894.144	0.24
*L-Ornithine, 4TMS derivative	1002.27	1002.09	1002.23	1002.25	1002.03	1002.14	1002.13	1002.14	1002.12	1002.15	1002.21	1002.14	1002.22	1002.23	1002.26	1002.22	1002.26	0.24
l-Leucine, N-methyl-N-(2-methoxyethoxycarbonyl)-, dodecyl ester	1250.01	1249.9	1250.03	1250.1	1249.94	1249.91	1249.95	1249.88	1249.95	1249.96	1249.88	1249.86	1249.95	1250.01	1250.01	1249.88	1250.01	0.24
Ornithine, N2-acetyl- (3TMS)_M000409_A200002-101-xxx_NA_1997,44_TRUE_2045,43_MOSYS_PRED_VAR5_ALK	1020.17	1019.96	1020.08	1020.13	1019.93	1020.04	1020	1020	1019.94	1020	1020.12	1020.05	1019.99	1020.04	1020.1	1019.96	1020.1	0.24
1-Aminocyclopentanecarboxylic acid, 3-chloropropoxycarbonyl-, tridecyl ester	868.536	868.536	868.536	868.536	868.536	868.536	868.726	868.536	868.536	868.536	868.536	868.536	868.488	868.524	868.536	868.522	868.536	0.238
NA168015 (classified unknown)_M000000_A168015-101-xxx_NA_1679,79_TRUE_1711,96_MOSYS_PRED_VAR5_ALK	924.678	924.496	924.676	924.659	924.467	924.595	924.597	924.58	924.519	924.619	924.636	924.56	924.698	924.698	924.698	924.6	924.698	0.231
*Mannose (1MEOX) (5TMS) MP_M000633_A188002-101-xxx_NA_1868,46_TRUE_1910,03_MOSYS_PRED_VAR5_ALK	1067.59	1067.63	1067.63	1067.81	1067.63	1067.63	1067.63	1067.63	1067.63	1067.63	1067.59	1067.63	1067.6	1067.58	1067.63	1067.62	1067.63	0.23
*Glucose-6-phosphate (1MEOX) (6TMS) BP_M000513_A235002-101-xxx_NA_2328,97_TRUE_2393,48_MOSYS_PRED_VAR5_ALK	1455.76	1455.63	1455.62	1455.7	1455.59	1455.65	1455.72	1455.59	1455.57	1455.67	1455.73	1455.61	1455.77	1455.8	1455.78	1455.76	1455.78	0.23
(Z)-Docos-9-enenitrile	1397.2	1397.09	1397.14	1397.2	1397.1	1397.15	1397.16	1397.31	1397.09	1397.12	1397.16	1397.31	1397.29	1397.3	1397.31	1397.26	1397.08	0.23
NA_M000000_A277004-101-xxx_NA_2754,72_PRED_2840,44_MOSYS_PRED_VAR5_ALK	1531.86	1531.86	1531.86	1531.86	1531.86	1531.86	1531.86	1531.86	1531.86	1531.73	1531.66	1531.71	1531.86	1531.86	1531.86	1531.89	1531.86	0.23
Heptasiloxane, hexadecamethyl-	808.981	808.802	808.993	808.962	808.815	808.915	808.913	808.853	808.81	808.872	808.895	808.852	808.904	808.958	808.969	808.931	808.769	0.224
4-Chloro-1-azabicyclo[2.2.2]octane	380.135	380.135	380.135	380.135	380.135	380.135	380.135	380.135	380.135	379.913	380.135	380.135	380.135	380.135	380.135	380.135	380.135	0.222
*D155405_M000000_A155014-101-xxx_NA_1554,13_TRUE_1580,04_MOSYS_PRED_VAR5_ALK	813.118	812.94	813.052	813.052	812.897	813.052	813.012	813.021	812.943	812.989	813.06	813.012	812.995	813.045	813.052	813.059	813.052	0.221
Pipecolic acid, 2TMS derivative	643.777	643.777	643.777	643.777	643.777	643.777	643.556	643.768	643.777	643.657	643.777	643.621	643.735	643.754	643.777	643.734	643.777	0.221
Putrescine (4TMS)_M000186_A175002-101-xxx_NA_1734,98_TRUE_1754,00_MOSYS_TRUE_VAR5_ALK	957.015	956.817	956.988	956.961	956.798	956.916	956.859	956.919	956.799	956.858	956.883	956.813	956.899	956.852	956.907	956.885	956.907	0.217
Unknown#bth-pae-035_M000000_A153019-101-xxx_NA_1521,51_PRED_1545,79_MOSYS_PRED_VAR5_ALK	790.707	790.707	790.707	790.707	790.707	790.707	790.707	790.707	790.597	790.611	790.707	790.581	790.727	790.68	790.707	790.797	790.707	0.216
Glutamine [-H2O] (3TMS) MP_M000032_A160005-101-x1[NA]_NA_1580,83_TRUE_VAR5_ALK	836.793	836.793	836.793	836.793	836.793	836.885	836.793	836.793	836.753	836.719	836.785	836.692	836.906	836.843	836.793	836.902	836.793	0.214
Unknown#sst-cgl-078_M000000_A184036-101-xxx_NA_1840,13_PRED_1880,28_MOSYS_PRED_VAR5_ALK	1025.52	1025.34	1025.48	1025.49	1025.34	1025.43	1025.37	1025.39	1025.31	1025.36	1025.41	1025.32	1025.42	1025.39	1025.42	1025.41	1025.42	0.21
D260482_M000000_A260006-101-xxx_NA_2604,01_TRUE_2682,22_MOSYS_PRED_VAR5_ALK	1447.61	1447.49	1447.54	1447.56	1447.49	1447.47	1447.51	1447.41	1447.48	1447.55	1447.6	1447.48	1447.57	1447.62	1447.6	1447.59	1447.41	0.21
*2-Deoxyadenosine (3TMS)	1472.1	1472.1	1472.1	1472.1	1472.1	1472.1	1472.1	1472.1	1471.93	1471.99	1472.02	1471.95	1472.09	1472.13	1472.1	1472.05	1472.1	0.2
*NA_M000000_A184003-101-xxx_NA_1820,79_PRED_1859,98_MOSYS_PRED_VAR5_ALK	1014.25	1014.05	1014.19	1014.24	1014.05	1014.15	1014.1	1014.09	1014.1	1014.15	1014.16	1014.09	1014.14	1014.11	1014.14	1014.12	1014.14	0.2
Spermidine (5TMS)_M000106_A226002-101-xxx_NA_2251,32_TRUE_2284,00_MOSYS_TRUE_VAR5_ALK	1278.99	1278.83	1278.91	1278.96	1278.82	1278.87	1278.9	1278.79	1278.87	1278.87	1278.94	1278.86	1278.84	1278.87	1278.89	1278.79	1278.89	0.2
1,2-Benzenedicarboxylic acid, bis(2-ethylhexyl) ester	1426.93	1426.95	1426.83	1426.87	1426.95	1426.95	1426.95	1426.95	1426.95	1426.95	1426.95	1426.95	1426.95	1426.95	1426.95	1426.95	1426.75	0.2
Pipecolic acid, N-ethoxycarbonyl-, dodecyl ester	1097.65	1097.45	1097.58	1097.63	1097.48	1097.52	1097.58	1097.6	1097.49	1097.55	1097.58	1097.49	1097.6	1097.61	1097.6	1097.54	1097.6	0.2
*Glycyl-proline (3TMS)	1114.81	1114.63	1114.75	1114.82	1114.68	1114.71	1114.75	1114.69	1114.65	1114.72	1114.76	1114.69	1114.81	1114.82	1114.83	1114.76	1114.83	0.2
L-Methionine Sulfoxide, N,N-bis(triimethylsilyl)-, trimethylsilyl ester	977.287	977.287	977.287	977.287	977.287	977.287	977.287	977.287	977.357	977.363	977.287	977.421	977.266	977.232	977.287	977.264	977.287	0.189
*Thymidine-5'-monophosphoric-acid_3TMS_M000000_A282014-101-x1[NA]_NA_2816,53_PRED_VAR5_ALK	987.082	986.899	987.02	987.067	986.908	986.957	986.947	986.905	986.917	986.967	986.994	986.922	987.008	987.007	987.037	986.961	987.037	0.183
Thymidine-5'-monophosphoric-acid_3TMS_M000000_A282014-101-x1[NA]_NA_2816,53_PRED_VAR5_ALK	987.082	986.899	987.02	987.067	986.908	986.957	986.947	986.905	986.917	986.967	986.994	986.922	987.008	987.007	987.037	986.961	987.037	0.183
1-Isopropoxy-2-trihexylsilyloxybenzene	1125.39	1125.31	1125.4	1125.45	1125.32	1125.36	1125.4	1125.31	1125.3	1125.37	1125.39	1125.3	1125.37	1125.4	1125.39	1125.32	1125.27	0.18
Benzothiazole, 2-(2-hydroxyethylthio)-	1220.35	1220.21	1220.31	1220.33	1220.19	1220.23	1220.19	1220.28	1220.22	1220.25	1220.23	1220.2	1220.25	1220.26	1220.26	1220.22	1220.17	0.18
Muramic acid, N-acetyl- (1MEOX) (4TMS) MP_M001064_A227006-101-x1[NA]_NA_2276,07_TRUE_VAR5_ALK	1307.58	1307.58	1307.58	1307.58	1307.58	1307.58	1307.63	1307.58	1307.58	1307.55	1307.61	1307.46	1307.57	1307.58	1307.58	1307.49	1307.58	0.17
NA_M000000_A354003-101-xxx_NA_3535,28_PRED_3659,88_MOSYS_PRED_VAR5_ALK	1907.9	1907.9	1907.9	1907.9	1907.9	1907.9	1907.9	1907.9	1907.9	1907.9	1907.9	1907.9	1907.9	1907.85	1907.9	1907.73	1907.9	0.17
Unknown#bth-pae-014_M000000_A117009-101-xxx_NA_1167,66_PRED_1174,31_MOSYS_PRED_VAR5_ALK	478.647	478.647	478.647	478.647	478.647	478.647	478.647	478.647	478.647	478.647	478.523	478.647	478.647	478.48	478.647	478.647	478.647	0.167
Tridecane, n-_M000533_A130004-101-x1[n-]_NA_1293,26_PRED_VAR5_ALK	542.058	542.058	542.058	542.058	542.058	542.058	541.895	542.058	542.058	542.059	542.058	542.058	542.058	542.058	542.058	542.058	542.058	0.164
Siloxane_M000870_A183010-101-xxx_NA_1828,56_PRED_1868,14_MOSYS_PRED_VAR5_ALK	1521.14	1521.14	1521.14	1521.14	1520.98	1521.09	1521.1	1521.14	1521.14	1521.05	1521.14	1521.02	1521.05	1521.14	1521.14	1521.07	1521.14	0.16
Bernzothiazole, 2-[2-(2-fluorophenoxy)ethylthio]-	1314.32	1314.2	1314.28	1314.31	1314.22	1314.23	1314.24	1314.27	1314.17	1314.23	1314.27	1314.19	1314.23	1314.25	1314.27	1314.22	1314.27	0.15
Hypoxanthine (2TMS)_M000294_A182006-101-x1[NA]_NA_1808,98_TRUE_VAR5_ALK	990.648	990.501	990.631	990.631	990.5	990.54	990.631	990.56	990.578	990.605	990.585	990.631	990.631	990.565	990.631	990.639	990.631	0.148
D164543_M000000_A164017-101-xxx_NA_1645,42_TRUE_1675,87_MOSYS_PRED_VAR5_ALK	883.893	883.893	883.893	883.893	883.893	883.893	883.893	883.893	883.893	883.893	883.893	883.893	883.756	883.811	883.893	883.87	883.893	0.137
Dihydroxyacetone phosphate (1MEOX) (3TMS) BP_M000327_A177006-101-x1[NA]_NA_1746,58_TRUE_VAR5_ALK	952.723	952.723	952.723	952.723	952.723	952.723	952.723	952.617	952.723	952.606	952.723	952.591	952.723	952.662	952.723	952.697	952.723	0.132
Fructose-1-phosphate (1MEOX) (6TMS) MP_M000509_A230003-101-x1[NA]_NA_2282,83_TRUE_VAR5_ALK	1584.49	1584.36	1584.36	1584.36	1584.36	1584.36	1584.36	1584.36	1584.36	1584.36	1584.36	1584.36	1584.42	1584.36	1584.36	1584.44	1584.36	0.13
beta-Alanyl-lysine (6TMS)_M001083_A255007-101-x1[L-]_NA_2553,19_TRUE_VAR5_ALK	1168.74	1168.74	1168.74	1168.74	1168.74	1168.67	1168.69	1168.64	1168.68	1168.7	1168.74	1168.63	1168.76	1168.75	1168.74	1168.65	1168.74	0.13
4,4'-Biphenyldiol, 2TMS derivative	792.701	792.701	792.701	792.701	792.603	792.684	792.701	792.701	792.611	792.675	792.701	792.701	792.707	792.713	792.701	792.725	792.701	0.122
5-Hydroxytryptophan, 4TMS derivative	1194.2	1194.2	1194.2	1194.2	1194.2	1194.2	1194.2	1194.2	1194.2	1194.2	1194.2	1194.09	1194.16	1194.17	1194.2	1194.08	1194.2	0.12
Silanamine, N-[2-[2-methoxy-4-[(trimethylsilyl)oxy]phenyl]ethyl]-1,1,1-trimethyl-N-(trimethylsilyl)-	1442.73	1442.73	1442.73	1442.73	1442.73	1442.73	1442.73	1442.73	1442.73	1442.73	1442.73	1442.73	1442.73	1442.83	1442.73	1442.71	1442.73	0.12
l-Norvaline, n-propoxycarbonyl-, undecyl ester	1117.06	1117.06	1117.06	1117.06	1117.06	1117.06	1117.06	1117.06	1117.06	1117.06	1117.06	1116.96	1117.05	1117.07	1117.06	1117	1117.06	0.11
Phenol, 2,4-bis(1,1-dimethylethyl)-, phosphite (3:1)	1822	1822	1822	1822	1822	1821.97	1821.96	1822	1822	1822	1822	1822	1821.93	1822	1822	1821.92	1821.9	0.1
Galactinol (9TMS)_M000673_A299002-101-xxx_NA_2966,29_TRUE_3070,40_MOSYS_TRUE_VAR5_ALK	1665.17	1665.17	1665.17	1665.17	1665.17	1665.17	1665.17	1665.17	1665.17	1665.17	1665.19	1665.17	1665.12	1665.15	1665.17	1665.1	1665.17	0.09
Glucose, 5TMS derivative	1644.88	1644.88	1644.88	1644.88	1644.88	1644.88	1644.88	1644.88	1644.88	1644.88	1644.88	1644.88	1644.79	1644.88	1644.88	1644.88	1644.88	0.09
Vinyl ether	586.302	586.302	586.302	586.302	586.302	586.302	586.302	586.302	586.302	586.302	586.302	586.302	586.302	586.219	586.302	586.302	586.302	0.083
Trehalose, alpha,alpha'-, D- (8TMS)_M000671_A274002-101-xxx_NA_2726,3_TRUE_2809,10_MOSYS_TRUE_VAR5_ALK	1628.04	1628.04	1628.04	1628.04	1628.04	1628.04	1628.04	1627.99	1628.04	1628.02	1628.04	1628.04	1628.04	1628.07	1628.04	1628.04	1628.04	0.08
Trehalose, alpha,alpha'-, D- (8TMS)_M000671_A274002-101-xxx_NA_2726,3_TRUE_2809,10_MOSYS_TRUE_VAR5_ALK	1628.04	1628.04	1628.04	1628.04	1628.04	1628.04	1628.04	1627.99	1628.04	1628.02	1628.04	1628.04	1628.04	1628.07	1628.04	1628.04	1628.04	0.08
d-Proline, N-ethoxycarbonyl-, heptyl ester	1265.76	1265.76	1265.76	1265.76	1265.76	1265.76	1265.76	1265.76	1265.76	1265.76	1265.76	1265.76	1265.73	1265.77	1265.76	1265.69	1265.76	0.08
L-Asparagine, Nγ-[2-(acetylamino)-4-O-[2-(acetylamino)-2-deoxy-3,4,6-tris-O-(trimethylsilyl)-β-D-glucopyranosyl]-2-deoxy-3,6-bis-O-(trimethylsilyl)-β-D-glucopyranosyl]-	1702.7	1702.7	1702.7	1702.7	1702.7	1702.7	1702.7	1702.7	1702.7	1702.7	1702.7	1702.7	1702.68	1702.71	1702.7	1702.63	1702.7	0.08
Unknown#sst-cgl-114_M000000_A229006-101-xxx_NA_2290,3_PRED_2352,88_MOSYS_PRED_VAR5_ALK	1578.98	1578.98	1578.98	1578.98	1578.98	1578.98	1578.98	1578.98	1578.98	1578.98	1578.98	1578.98	1578.92	1578.99	1578.98	1578.98	1578.98	0.07
l-Norvaline, N-ethoxycarbonyl-, pentadecyl ester	1251.25	1251.25	1251.25	1251.25	1251.25	1251.25	1251.25	1251.25	1251.25	1251.25	1251.25	1251.25	1251.23	1251.24	1251.25	1251.18	1251.25	0.07
*Valylvaline, N,N'dimethyl-N'-ethoxycarbonyl-, undecyl ester	975.863	975.863	975.863	975.863	975.863	975.863	975.863	975.863	975.863	975.863	975.863	975.863	975.825	975.796	975.863	975.863	975.863	0.067
Fructose-1,6-diphosphate (1MEOX) (7TMS) MP_M000511_A272002-101-xxx_NA_2708,96_PRED_2792,40_MOSYS_PRED_VAR5_ALK	1536.53	1536.53	1536.53	1536.53	1536.53	1536.53	1536.53	1536.53	1536.53	1536.53	1536.53	1536.53	1536.51	1536.47	1536.53	1536.53	1536.53	0.06
D-Erythro-Pentose, 2-deoxy-3,4-bis-O-(trimethylsilyl)-, 5-[bis(trimethylsilyl) methoxyphosphorimidate]	1146.84	1146.84	1146.84	1146.84	1146.84	1146.84	1146.84	1146.84	1146.84	1146.84	1146.84	1146.84	1146.81	1146.79	1146.84	1146.84	1146.84	0.05
Norleucine, N-trimethylsilyl-, trimethylsilyl ester	964.978	964.978	964.978	964.978	964.978	964.978	964.978	964.978	964.978	964.978	964.978	964.978	964.96	964.939	964.978	964.983	964.978	0.044
Fructose-6-phosphate (1MEOX) (6TMS) MP_M000510_A232002-101-xxx_NA_2292,48_TRUE_2355,17_MOSYS_PRED_VAR5_ALK	1591.85	1591.85	1591.85	1591.85	1591.85	1591.85	1591.85	1591.85	1591.85	1591.85	1591.85	1591.85	1591.85	1591.89	1591.85	1591.85	1591.85	0.04
NA_M000000_A239003-101-xxx_NA_2384,42_PRED_2451,69_MOSYS_PRED_VAR5_ALK	1360.99	1360.99	1360.99	1360.99	1360.99	1360.99	1360.99	1360.99	1361.03	1360.99	1360.99	1360.99	1361.03	1360.99	1360.99	1360.99	1360.99	0.04
D-Fructose, 1,3,4,5,6-pentakis-O-(trimethylsilyl)-, O-methyloxime	1049.49	1049.49	1049.49	1049.49	1049.49	1049.49	1049.49	1049.49	1049.49	1049.49	1049.49	1049.49	1049.49	1049.46	1049.49	1049.49	1049.49	0.03
*d-Proline, n-propoxycarbonyl-, hexadecyl ester	732.693	732.693	732.693	732.693	732.693	732.693	732.693	732.693	732.693	732.693	732.693	732.693	732.693	732.717	732.693	732.693	732.693	0.024
Raffinose (11TMS)_M000049_A337002-101-xxx_NA_3350,64_TRUE_3494,90_MOSYS_TRUE_VAR5_ALK	1841.94	1841.94	1841.94	1841.94	1841.94	1841.94	1841.94	1841.94	1841.94	1841.94	1841.92	1841.94	1841.94	1841.94	1841.94	1841.94	1841.94	0.02
3-Indolylacetamide, TMS derivative	1667.45	1667.45	1667.45	1667.45	1667.45	1667.45	1667.45	1667.45	1667.45	1667.45	1667.45	1667.45	1667.43	1667.45	1667.45	1667.45	1667.45	0.02
D-Ribofuranose, 2,3,5-tris-O-(trimethylsilyl)-, bis(trimethylsilyl) phosphate	1529.62	1529.62	1529.62	1529.62	1529.62	1529.62	1529.62	1529.62	1529.62	1529.62	1529.62	1529.62	1529.62	1529.63	1529.62	1529.62	1529.62	0.01
Siloxane_M000870_A225011-101-xxx_NA_2256,43_PRED_2317,32_MOSYS_PRED_VAR5_ALK	1656.57	1656.57	1656.57	1656.57	1656.57	1656.57	1656.57	1656.57	1656.57	1656.57	1656.57	1656.57	1656.57	1656.57	1656.57	1656.57	1656.57	0
Siloxane_M000870_A225011-101-xxx_NA_2256,43_PRED_2317,32_MOSYS_PRED_VAR5_ALK	1656.57	1656.57	1656.57	1656.57	1656.57	1656.57	1656.57	1656.57	1656.57	1656.57	1656.57	1656.57	1656.57	1656.57	1656.57	1656.57	1656.57	0
Siloxane_M000870_A225011-101-xxx_NA_2256,43_PRED_2317,32_MOSYS_PRED_VAR5_ALK	1656.57	1656.57	1656.57	1656.57	1656.57	1656.57	1656.57	1656.57	1656.57	1656.57	1656.57	1656.57	1656.57	1656.57	1656.57	1656.57	1656.57	0
1-(2-(3-Cyclohexenyl)ethyl)silatrane	525.149	525.149	525.149	525.149	525.149	525.149	525.149	525.149	525.149	525.149	525.149	525.149	525.149	525.149	525.149	525.149	525.149	0
1-(2-(3-Cyclohexenyl)ethyl)silatrane	525.149	525.149	525.149	525.149	525.149	525.149	525.149	525.149	525.149	525.149	525.149	525.149	525.149	525.149	525.149	525.149	525.149	0
1-(2-(3-Cyclohexenyl)ethyl)silatrane	525.149	525.149	525.149	525.149	525.149	525.149	525.149	525.149	525.149	525.149	525.149	525.149	525.149	525.149	525.149	525.149	525.149	0
1-(2-(3-Cyclohexenyl)ethyl)silatrane	525.149	525.149	525.149	525.149	525.149	525.149	525.149	525.149	525.149	525.149	525.149	525.149	525.149	525.149	525.149	525.149	525.149	0
1-(2-(3-Cyclohexenyl)ethyl)silatrane	525.149	525.149	525.149	525.149	525.149	525.149	525.149	525.149	525.149	525.149	525.149	525.149	525.149	525.149	525.149	525.149	525.149	0
1-(2-(3-Cyclohexenyl)ethyl)silatrane	525.149	525.149	525.149	525.149	525.149	525.149	525.149	525.149	525.149	525.149	525.149	525.149	525.149	525.149	525.149	525.149	525.149	0
1-(2-(3-Cyclohexenyl)ethyl)silatrane	525.149	525.149	525.149	525.149	525.149	525.149	525.149	525.149	525.149	525.149	525.149	525.149	525.149	525.149	525.149	525.149	525.149	0
1-(2-(3-Cyclohexenyl)ethyl)silatrane	525.149	525.149	525.149	525.149	525.149	525.149	525.149	525.149	525.149	525.149	525.149	525.149	525.149	525.149	525.149	525.149	525.149	0
1-(2-(3-Cyclohexenyl)ethyl)silatrane	525.149	525.149	525.149	525.149	525.149	525.149	525.149	525.149	525.149	525.149	525.149	525.149	525.149	525.149	525.149	525.149	525.149	0
*Maltotriose (1MEOX) (11TMS) MP_M000269_A355003-101-xxx_NA_3507,56_TRUE_3630,78_MOSYS_PRED_VAR5_ALK	1951.7	1951.7	1951.7	1951.7	1951.7	1951.7	1951.7	1951.7	1951.7	1951.7	1951.7	1951.7	1951.7	1951.7	1951.7	1951.7	1951.7	0
*1,3-Dihydroxyaceton (1MEOX) (2TMS) MP_M000438_A124003-101-xxx_NA_1242,06_TRUE_1252,42_MOSYS_PRED_VAR5_ALK	543.248	543.248	543.248	543.248	543.248	543.248	543.248	543.248	543.248	543.248	543.248	543.248	543.248	543.248	543.248	543.248	543.248	0
Inosine-5'-monophosphate (5TMS)_M001129_A298003-101-xxx_NA_2984,72_TRUE_3081,90_MOSYS_PRED_VAR5_ALK	1653.62	1653.62	1653.62	1653.62	1653.62	1653.62	1653.62	1653.62	1653.62	1653.62	1653.62	1653.62	1653.62	1653.62	1653.62	1653.62	1653.62	0
1-(Palmitoyloxy)-3-((trimethylsilyl)oxy)propan-2-yl (Z)-hexadec-9-enoate	2067.93	2067.93	2067.93	2067.93	2067.93	2067.93	2067.93	2067.93	2067.93	2067.93	2067.93	2067.93	2067.93	2067.93	2067.93	2067.93	2067.93	0
Lactobionic acid (TMS) MP_M001097_A279009-101-xxx_NA_2798,1_TRUE_2885,98_MOSYS_PRED_VAR5_ALK	1621.8	1621.8	1621.8	1621.8	1621.8	1621.8	1621.8	1621.8	1621.8	1621.8	1621.8	1621.8	1621.8	1621.8	1621.8	1621.8	1621.8	0
Glyceraldehyde (1MEOX) (2TMS) BP_M000452_A123004-101-x1[S-]_NA_1194,03_TRUE_VAR5_ALK	513.621	513.621	513.621	513.621	513.621	513.621	513.621	513.621	513.621	513.621	513.621	513.621	513.621	513.621	513.621	513.621	513.621	0
Unknown#sst-cgl-122_M000000_A266012-101-xxx_NA_2659,18_PRED_2740,14_MOSYS_PRED_VAR5_ALK	1877.05	1877.05	1877.05	1877.05	1877.05	1877.05	1877.05	1877.05	1877.05	1877.05	1877.05	1877.05	1877.05	1877.05	1877.05	1877.05	1877.05	0
Propane, 2-methyl-1-nitro-	806.942	806.942	806.942	806.942	806.942	806.942	806.942	806.942	806.942	806.942	806.942	806.942	806.942	806.942	806.942	806.942	806.942	0
Azulene	486.594	486.594	486.594	486.594	486.594	486.594	486.594	486.594	486.594	486.594	486.594	486.594	486.594	486.594	486.594	486.594	486.594	0
Fructose-1,6-diphosphate (1MEOX) (7TMS) BP_M000511_A272001-101-xxx_NA_2714,26_PRED_2797,96_MOSYS_PRED_VAR5_ALK	1539.2	1539.2	1539.2	1539.2	1539.2	1539.2	1539.2	1539.2	1539.2	1539.2	1539.2	1539.2	1539.2	1539.2	1539.2	1539.2	1539.2	0
Decane, 2,9-dimethyl-	729.623	729.623	729.623	729.623	729.623	729.623	729.623	729.623	729.623	729.623	729.623	729.623	729.623	729.623	729.623	729.623	729.623	0
3-Ethyl-3-methylheptane	521.866	521.866	521.866	521.866	521.866	521.866	521.866	521.866	521.866	521.866	521.866	521.866	521.866	521.866	521.866	521.866	521.866	0
2-Pyrrolidinone, 1-methyl-	353.64	353.64	353.64	353.64	353.64	353.64	353.64	353.64	353.64	353.64	353.64	353.64	353.64	353.64	353.64	353.64	353.64	0
Tetracosamethyl-cyclododecasiloxane	1736.31	1736.31	1736.31	1736.31	1736.31	1736.31	1736.31	1736.31	1736.31	1736.31	1736.31	1736.31	1736.31	1736.31	1736.31	1736.31	1736.31	0
1,2-Benzisothiazole	522.622	522.622	522.622	522.622	522.622	522.622	522.622	522.622	522.622	522.622	522.622	522.622	522.622	522.622	522.622	522.622	522.622	0
1-Octylsilatrane	711.862	711.862	711.862	711.862	711.862	711.862	711.862	711.862	711.862	711.862	711.862	711.862	711.862	711.862	711.862	711.862	711.862	0
Hexadecyl octyl ether	710.686	710.686	710.686	710.686	710.686	710.686	710.686	710.686	710.686	710.686	710.686	710.686	710.686	710.686	710.686	710.686	710.686	0
3-Trimethylsiloxyvaleric acid, trimethylsilyl ester	526.745	526.745	526.745	526.745	526.745	526.745	526.745	526.745	526.745	526.745	526.745	526.745	526.745	526.745	526.745	526.745	526.745	0
Mannose-6-phosphate (1MEOX) (6TMS) BP_M000711_A233001-101-x1[D-]_NA_2313,44_TRUE_VAR5_ALK	1417.2	1417.2	1417.2	1417.2	1417.2	1417.2	1417.2	1417.2	1417.2	1417.2	1417.2	1417.2	1417.2	1417.2	1417.2	1417.2	1417.2	0
Butane, 1-isothiocyanato-	317.776	317.776	317.776	317.776	317.776	317.776	317.776	317.776	317.776	317.776	317.776	317.776	317.776	317.776	317.776	317.776	317.776	0
Sulfuric acid, 2TMS derivative	465.721	465.721	465.721	465.721	465.721	465.721	465.721	465.721	465.721	465.721	465.721	465.721	465.721	465.721	465.721	465.721	465.721	0
NA_M000000_A287007-101-xxx_NA_2866,73_PRED_2958,03_MOSYS_PRED_VAR5_ALK	1673.54	1673.54	1673.54	1673.54	1673.54	1673.54	1673.54	1673.54	1673.54	1673.54	1673.54	1673.54	1673.54	1673.54	1673.54	1673.54	1673.54	0
NA170001 (classified unknown)_M000000_A170001-101-xxx_NA_1688,9_PRED_1721,52_MOSYS_PRED_VAR5_ALK	1575.51	1575.51	1575.51	1575.51	1575.51	1575.51	1575.51	1575.51	1575.51	1575.51	1575.51	1575.51	1575.51	1575.51	1575.51	1575.51	1575.51	0
2,2,4,4,5,5,7,7-Octamethyloctane	1292.68	1292.68	1292.68	1292.68	1292.68	1292.68	1292.68	1292.68	1292.68	1292.68	1292.68	1292.68	1292.68	1292.68	1292.68	1292.68	1292.68	0
5-Methyluridine, 3TMS derivative	1581.39	1581.39	1581.39	1581.39	1581.39	1581.39	1581.39	1581.39	1581.39	1581.39	1581.39	1581.39	1581.39	1581.39	1581.39	1581.39	1581.39	0
Maltitol, nonakis(trimethylsilyl) ether	1599.28	1599.28	1599.28	1599.28	1599.28	1599.28	1599.28	1599.28	1599.28	1599.28	1599.28	1599.28	1599.28	1599.28	1599.28	1599.28	1599.28	0
Dodecane, 2,6,10-trimethyl-	962.557	962.557	962.557	962.557	962.557	962.557	962.557	962.557	962.557	962.557	962.557	962.557	962.557	962.557	962.557	962.557	962.557	0
2-Butene-1,4-diol, (E)-, 2TMS derivative	424.503	424.503	424.503	424.503	424.503	424.503	424.503	424.503	424.503	424.503	424.503	424.503	424.503	424.503	424.503	424.503	424.503	0
Unknown#sst-cgl-122_M000000_A266012-101-xxx_NA_2659,18_PRED_2740,14_MOSYS_PRED_VAR5_ALK	1877.05	1877.05	1877.05	1877.05	1877.05	1877.05	1877.05	1877.05	1877.05	1877.05	1877.05	1877.05	1877.05	1877.05	1877.05	1877.05	1877.05	0
Octane, 2,7-dimethyl-	313.4	313.4	313.4	313.4	313.4	313.4	313.4	313.4	313.4	313.4	313.4	313.4	313.4	313.4	313.4	313.4	313.4	0
Pantothenic acid tritms	1119.88	1119.88	1119.88	1119.88	1119.88	1119.88	1119.88	1119.88	1119.88	1119.88	1119.88	1119.88	1119.88	1119.88	1119.88	1119.88	1119.88	0
Hydrobenzoin, 2TMS derivative	1833.09	1833.09	1833.09	1833.09	1833.09	1833.09	1833.09	1833.09	1833.09	1833.09	1833.09	1833.09	1833.09	1833.09	1833.09	1833.09	1833.09	0
α-D-Lactose, 8TMS derivative	1517.79	1517.79	1517.79	1517.79	1517.79	1517.79	1517.79	1517.79	1517.79	1517.79	1517.79	1517.79	1517.79	1517.79	1517.79	1517.79	1517.79	0
Sulfurous acid, decyl 2-ethylhexyl ester	742.623	742.623	742.623	742.623	742.623	742.623	742.623	742.623	742.623	742.623	742.623	742.623	742.623	742.623	742.623	742.623	742.623	0
3-Butene-1,2-diol, 1-(2-furanyl)-	1132.44	1132.44	1132.44	1132.44	1132.44	1132.44	1132.44	1132.44	1132.44	1132.44	1132.44	1132.44	1132.44	1132.44	1132.44	1132.44	1132.44	0
Thymidine, 3'-O-(trimethylsilyl)-, 5'-[bis(trimethylsilyl) phosphate]	1670.86	1670.86	1670.86	1670.86	1670.86	1670.86	1670.86	1670.86	1670.86	1670.86	1670.86	1670.86	1670.86	1670.86	1670.86	1670.86	1670.86	0
1-Octylsilatrane	711.862	711.862	711.862	711.862	711.862	711.862	711.862	711.862	711.862	711.862	711.862	711.862	711.862	711.862	711.862	711.862	711.862	0
NA_M000000_A235007-101-x1[NA]_NA_2322,67_PRED_VAR5_ALK	1372.47	1372.47	1372.47	1372.47	1372.47	1372.47	1372.47	1372.47	1372.47	1372.47	1372.47	1372.47	1372.47	1372.47	1372.47	1372.47	1372.47	0

## Sheet: Match certainty
	3h V1	3h V2	3h V3	3h V4	6h V1	6h V2	6h V3	6h V4	3h C1	3h C2	3h C3	3h C4	6h C1	6h C2	6h C3	6h C4	Medium
Dodecane	Match	Match	Out of Tolerance	Match	Match	Match	Match	Out of Tolerance	Match	Match	Match	Out of Tolerance	Out of Tolerance	Match	Unknown	Out of Tolerance	Match
L-Threonine, 3TMS derivative	Out of Tolerance	Out of Tolerance	Out of Tolerance	Out of Tolerance	Out of Tolerance	Out of Tolerance	Out of Tolerance	Out of Tolerance	Out of Tolerance	Match	Out of Tolerance	Out of Tolerance	Match	Match	Unknown	Match	Not Found
*Hydroxylamine (3TMS)	Out of Tolerance	Out of Tolerance	Out of Tolerance	Out of Tolerance	Out of Tolerance	Out of Tolerance	Out of Tolerance	Out of Tolerance	Match	Out of Tolerance	Match	Match	Match	Match	Unknown	Match	Out of Tolerance
L-Leucine, TMS derivative	Out of Tolerance	Out of Tolerance	Not Found	Out of Tolerance	Out of Tolerance	Not Found	Out of Tolerance	Not Found	Out of Tolerance	Out of Tolerance	Out of Tolerance	Out of Tolerance	Out of Tolerance	Match	Unknown	Not Found	Not Found
Lactic Acid, 2TMS derivative	Not Found	Out of Tolerance	Not Found	Out of Tolerance	Not Found	Not Found	Out of Tolerance	Not Found	Out of Tolerance	Out of Tolerance	Out of Tolerance	Out of Tolerance	Not Found	Match	Unknown	Not Found	Out of Tolerance
Maltose (1MEOX) (8TMS) BP_M000048_A277002-101-xxx_NA_2745,49_TRUE_2845,00_MOSYS_TRUE_VAR5_ALK	Out of Tolerance	Out of Tolerance	Out of Tolerance	Out of Tolerance	Out of Tolerance	Out of Tolerance	Out of Tolerance	Out of Tolerance	Out of Tolerance	Out of Tolerance	Out of Tolerance	Out of Tolerance	Out of Tolerance	Match	Unknown	Match	Not Found
Valine (2TMS)_M000030_A122001-101-xxx_NA_1207,1_TRUE_1227,10_MOSYS_TRUE_VAR5_ALK	Out of Tolerance	Out of Tolerance	Out of Tolerance	Out of Tolerance	Out of Tolerance	Not Found	Out of Tolerance	Out of Tolerance	Out of Tolerance	Out of Tolerance	Out of Tolerance	Out of Tolerance	Out of Tolerance	Match	Unknown	Out of Tolerance	Out of Tolerance
*Ribose	Out of Tolerance	Out of Tolerance	Out of Tolerance	Out of Tolerance	Out of Tolerance	Out of Tolerance	Out of Tolerance	Out of Tolerance	Out of Tolerance	Out of Tolerance	Out of Tolerance	Out of Tolerance	Match	Match	Unknown	Out of Tolerance	Not Found
*Trehalose (8TMS)	Out of Tolerance	Out of Tolerance	Not Found	Not Found	Out of Tolerance	Out of Tolerance	Out of Tolerance	Out of Tolerance	Out of Tolerance	Not Found	Out of Tolerance	Match	Match	Match	Unknown	Match	Not Found
Phenylalanine, 2TMS derivative	Out of Tolerance	Out of Tolerance	Out of Tolerance	Out of Tolerance	Out of Tolerance	Out of Tolerance	Out of Tolerance	Out of Tolerance	Out of Tolerance	Out of Tolerance	Out of Tolerance	Out of Tolerance	Out of Tolerance	Match	Unknown	Match	Not Found
*Adenine (2TMS)	Out of Tolerance	Out of Tolerance	Out of Tolerance	Out of Tolerance	Out of Tolerance	Out of Tolerance	Out of Tolerance	Out of Tolerance	Out of Tolerance	Out of Tolerance	Out of Tolerance	Out of Tolerance	Match	Match	Unknown	Match	Out of Tolerance
*Carbitol	Out of Tolerance	Out of Tolerance	Not Found	Out of Tolerance	Out of Tolerance	Not Found	Match	Out of Tolerance	Out of Tolerance	Match	Out of Tolerance	Match	Match	Out of Tolerance	Unknown	Match	Out of Tolerance
*2-Deoxyadenosine (3TMS)	Not Found	Not Found	Not Found	Not Found	Not Found	Not Found	Not Found	Not Found	Out of Tolerance	Out of Tolerance	Out of Tolerance	Out of Tolerance	Match	Match	Unknown	Match	Not Found
*Palmitic Acid (1TMS)	Match	Match	Match	Match	Match	Match	Match	Out of Tolerance	Match	Match	Match	Match	Match	Match	Unknown	Match	Out of Tolerance
*Adenosine-5-monophosphate (4TMS)	Out of Tolerance	Out of Tolerance	Out of Tolerance	Out of Tolerance	Out of Tolerance	Out of Tolerance	Out of Tolerance	Out of Tolerance	Out of Tolerance	Out of Tolerance	Out of Tolerance	Out of Tolerance	Match	Out of Tolerance	Unknown	Out of Tolerance	Out of Tolerance
*NA_M000000_A352002-101-x1[NA]_NA_3516,3_PRED_VAR5_ALK	Out of Tolerance	Out of Tolerance	Out of Tolerance	Out of Tolerance	Out of Tolerance	Out of Tolerance	Match	Out of Tolerance	Out of Tolerance	Out of Tolerance	Out of Tolerance	Out of Tolerance	Match	Match	Unknown	Out of Tolerance	Not Found
*Unknown#bth-pae-013_M000000_A116014-101-x1[NA]_NA_1158,99_PRED_VAR5_ALK	Match	Match	Match	Match	Match	Match	Out of Tolerance	Match	Out of Tolerance	Match	Match	Match	Out of Tolerance	Out of Tolerance	Unknown	Match	Out of Tolerance
*2-Ketoisocaproic acid (1TMS)	Out of Tolerance	Out of Tolerance	Out of Tolerance	Out of Tolerance	Out of Tolerance	Not Found	Out of Tolerance	Out of Tolerance	Out of Tolerance	Match	Out of Tolerance	Out of Tolerance	Out of Tolerance	Match	Unknown	Out of Tolerance	Not Found
*Propylene glycol (2TMS)	Out of Tolerance	Out of Tolerance	Not Found	Out of Tolerance	Match	Out of Tolerance	Match	Not Found	Out of Tolerance	Match	Match	Match	Match	Out of Tolerance	Unknown	Not Found	Out of Tolerance
Galactinol (9TMS)_M000673_A299002-101-xxx_NA_2966,29_TRUE_3070,40_MOSYS_TRUE_VAR5_ALK	Not Found	Not Found	Not Found	Not Found	Not Found	Not Found	Not Found	Not Found	Not Found	Not Found	Out of Tolerance	Not Found	Out of Tolerance	Match	Unknown	Out of Tolerance	Not Found
*Fumaric acid (2TMS)	Out of Tolerance	Out of Tolerance	Out of Tolerance	Out of Tolerance	Out of Tolerance	Out of Tolerance	Out of Tolerance	Out of Tolerance	Out of Tolerance	Out of Tolerance	Out of Tolerance	Out of Tolerance	Match	Match	Unknown	Match	Out of Tolerance
*Maltotriose (11TMS)	Not Found	Not Found	Not Found	Not Found	Out of Tolerance	Out of Tolerance	Out of Tolerance	Not Found	Not Found	Not Found	Not Found	Out of Tolerance	Match	Match	Unknown	Out of Tolerance	Not Found
*NA_M000000_A352002-101-x1[NA]_NA_3516,3_PRED_VAR5_ALK	Out of Tolerance	Out of Tolerance	Out of Tolerance	Out of Tolerance	Out of Tolerance	Out of Tolerance	Match	Out of Tolerance	Out of Tolerance	Out of Tolerance	Out of Tolerance	Out of Tolerance	Match	Match	Unknown	Out of Tolerance	Not Found
Asparagine (3TMS)_M000013_A168001-101-x1[DL-]_NA_1666,44_TRUE_VAR5_ALK	Out of Tolerance	Out of Tolerance	Not Found	Not Found	Out of Tolerance	Out of Tolerance	Out of Tolerance	Not Found	Out of Tolerance	Out of Tolerance	Out of Tolerance	Out of Tolerance	Match	Match	Unknown	Out of Tolerance	Not Found
L-Alanine, 2TMS derivative	Out of Tolerance	Out of Tolerance	Not Found	Out of Tolerance	Not Found	Not Found	Out of Tolerance	Not Found	Out of Tolerance	Out of Tolerance	Out of Tolerance	Out of Tolerance	Not Found	Match	Unknown	Not Found	Not Found
*7-(Trimethylsilyl)-2,6-bis[(trimethylsilyl)oxy]-7H-purine	Out of Tolerance	Out of Tolerance	Out of Tolerance	Out of Tolerance	Out of Tolerance	Not Found	Out of Tolerance	Out of Tolerance	Out of Tolerance	Out of Tolerance	Out of Tolerance	Out of Tolerance	Match	Match	Unknown	Match	Not Found
*Isovaleric acid, 2-oxo- (1MEOX) (1TMS) MP_M000449_A116004-101-x1[NA]_NA_1095,76_TRUE_VAR5_ALK	Out of Tolerance	Out of Tolerance	Not Found	Out of Tolerance	Not Found	Not Found	Out of Tolerance	Not Found	Out of Tolerance	Match	Out of Tolerance	Out of Tolerance	Not Found	Out of Tolerance	Unknown	Not Found	Not Found
*Methylal	Out of Tolerance	Out of Tolerance	Out of Tolerance	Out of Tolerance	Out of Tolerance	Not Found	Out of Tolerance	Out of Tolerance	Out of Tolerance	Out of Tolerance	Out of Tolerance	Out of Tolerance	Match	Match	Unknown	Out of Tolerance	Out of Tolerance
*Dihydroxyacetone phosphate (1MEOX) (3TMS)	Out of Tolerance	Out of Tolerance	Out of Tolerance	Out of Tolerance	Out of Tolerance	Out of Tolerance	Out of Tolerance	Out of Tolerance	Out of Tolerance	Out of Tolerance	Out of Tolerance	Out of Tolerance	Match	Out of Tolerance	Unknown	Out of Tolerance	Not Found
*Glucose-6-phosphate, 2-amino-2-deoxy- (6TMS)	Not Found	Not Found	Not Found	Out of Tolerance	Out of Tolerance	Out of Tolerance	Out of Tolerance	Out of Tolerance	Out of Tolerance	Out of Tolerance	Out of Tolerance	Out of Tolerance	Match	Match	Unknown	Out of Tolerance	Not Found
*NA114002 (classified unknown)_M000000_A114002-101-x1[NA]_NA_1129,96_TRUE_VAR5_ALK	Match	Match	Not Found	Match	Not Found	Not Found	Match	Not Found	Match	Match	Match	Match	Out of Tolerance	Match	Unknown	Match	Out of Tolerance
*Homoserine (3TMS)	Out of Tolerance	Out of Tolerance	Out of Tolerance	Out of Tolerance	Out of Tolerance	Out of Tolerance	Out of Tolerance	Out of Tolerance	Out of Tolerance	Out of Tolerance	Out of Tolerance	Out of Tolerance	Match	Match	Unknown	Out of Tolerance	Not Found
*Uridine 5'-monophosphate (5TMS)	Out of Tolerance	Out of Tolerance	Match	Out of Tolerance	Match	Out of Tolerance	Out of Tolerance	Out of Tolerance	Out of Tolerance	Out of Tolerance	Out of Tolerance	Out of Tolerance	Match	Out of Tolerance	Unknown	Out of Tolerance	Not Found
L-Glutamic acid, 3TMS derivative	Out of Tolerance	Out of Tolerance	Out of Tolerance	Out of Tolerance	Out of Tolerance	Out of Tolerance	Out of Tolerance	Out of Tolerance	Out of Tolerance	Out of Tolerance	Out of Tolerance	Out of Tolerance	Out of Tolerance	Match	Unknown	Not Found	Out of Tolerance
*Butanoic acid, 2-amino- (1TMS)	Not Found	Not Found	Not Found	Not Found	Not Found	Not Found	Not Found	Not Found	Out of Tolerance	Match	Match	Out of Tolerance	Not Found	Match	Unknown	Not Found	Not Found
L-Proline, 2TMS derivative	Out of Tolerance	Out of Tolerance	Out of Tolerance	Out of Tolerance	Out of Tolerance	Not Found	Out of Tolerance	Out of Tolerance	Out of Tolerance	Out of Tolerance	Out of Tolerance	Out of Tolerance	Out of Tolerance	Match	Unknown	Match	Out of Tolerance
*Stearic acid (1TMS)	Match	Match	Out of Tolerance	Out of Tolerance	Match	Match	Out of Tolerance	Out of Tolerance	Match	Match	Match	Match	Not Found	Match	Unknown	Match	Out of Tolerance
*2,2'-Bipyrrolidine	Out of Tolerance	Out of Tolerance	Not Found	Out of Tolerance	Out of Tolerance	Not Found	Out of Tolerance	Out of Tolerance	Match	Out of Tolerance	Match	Match	Out of Tolerance	Match	Unknown	Not Found	Not Found
*Pyrophosphate (4TMS)	Out of Tolerance	Out of Tolerance	Out of Tolerance	Out of Tolerance	Out of Tolerance	Out of Tolerance	Out of Tolerance	Out of Tolerance	Out of Tolerance	Not Found	Out of Tolerance	Out of Tolerance	Match	Match	Unknown	Out of Tolerance	Out of Tolerance
Dodecane, 2,7,10-trimethyl-	Match	Match	Match	Match	Match	Out of Tolerance	Match	Not Found	Out of Tolerance	Match	Out of Tolerance	Out of Tolerance	Not Found	Match	Unknown	Out of Tolerance	Match
*Pyrrole-2-carboxylic acid (2TMS)	Out of Tolerance	Out of Tolerance	Not Found	Out of Tolerance	Out of Tolerance	Out of Tolerance	Out of Tolerance	Out of Tolerance	Out of Tolerance	Out of Tolerance	Out of Tolerance	Out of Tolerance	Match	Match	Unknown	Match	Not Found
*Glycyl-proline (3TMS)	Out of Tolerance	Out of Tolerance	Out of Tolerance	Out of Tolerance	Out of Tolerance	Out of Tolerance	Out of Tolerance	Out of Tolerance	Out of Tolerance	Out of Tolerance	Out of Tolerance	Out of Tolerance	Match	Match	Unknown	Match	Not Found
Malic acid (3TMS)_M000065_A149001-101-xxx_NA_1478,99_TRUE_1503,50_MOSYS_TRUE_VAR5_ALK	Out of Tolerance	Out of Tolerance	Out of Tolerance	Out of Tolerance	Out of Tolerance	Out of Tolerance	Out of Tolerance	Out of Tolerance	Out of Tolerance	Out of Tolerance	Out of Tolerance	Out of Tolerance	Match	Match	Unknown	Match	Not Found
*NA_M000000_A184003-101-xxx_NA_1820,79_PRED_1859,98_MOSYS_PRED_VAR5_ALK	Out of Tolerance	Match	Match	Match	Out of Tolerance	Match	Match	Out of Tolerance	Out of Tolerance	Out of Tolerance	Out of Tolerance	Out of Tolerance	Match	Match	Unknown	Match	Not Found
Tyrosine (3TMS)_M000035_A194002-101-xxx_NA_1934,12_TRUE_1954,60_MOSYS_TRUE_VAR5_ALK	Out of Tolerance	Out of Tolerance	Out of Tolerance	Out of Tolerance	Out of Tolerance	Out of Tolerance	Out of Tolerance	Out of Tolerance	Out of Tolerance	Out of Tolerance	Out of Tolerance	Out of Tolerance	Match	Match	Unknown	Match	Not Found
*Thymine (2TMS)	Out of Tolerance	Out of Tolerance	Out of Tolerance	Out of Tolerance	Out of Tolerance	Out of Tolerance	Out of Tolerance	Out of Tolerance	Out of Tolerance	Out of Tolerance	Out of Tolerance	Out of Tolerance	Match	Match	Unknown	Match	Out of Tolerance
Spermidine (5TMS)_M000106_A226002-101-xxx_NA_2251,32_TRUE_2284,00_MOSYS_TRUE_VAR5_ALK	Match	Match	Match	Match	Match	Match	Match	Out of Tolerance	Out of Tolerance	Match	Out of Tolerance	Match	Match	Match	Unknown	Match	Not Found
*4-Trimethylsilylphenol	Out of Tolerance	Out of Tolerance	Not Found	Out of Tolerance	Match	Not Found	Match	Not Found	Match	Match	Match	Match	Not Found	Out of Tolerance	Unknown	Not Found	Match
*Alanyl-alanine (2TMS)	Out of Tolerance	Out of Tolerance	Out of Tolerance	Out of Tolerance	Out of Tolerance	Out of Tolerance	Out of Tolerance	Out of Tolerance	Out of Tolerance	Out of Tolerance	Out of Tolerance	Out of Tolerance	Match	Match	Unknown	Match	Not Found
*Butanoic acid, 4-amino- (3TMS)	Out of Tolerance	Out of Tolerance	Out of Tolerance	Out of Tolerance	Out of Tolerance	Out of Tolerance	Out of Tolerance	Out of Tolerance	Out of Tolerance	Out of Tolerance	Out of Tolerance	Out of Tolerance	Match	Match	Unknown	Match	Not Found
Proline [+CO2] (2TMS)_M000029_A159001-101-x1[NA]_NA_1583,16_TRUE_VAR5_ALK	Out of Tolerance	Out of Tolerance	Out of Tolerance	Out of Tolerance	Out of Tolerance	Out of Tolerance	Out of Tolerance	Out of Tolerance	Out of Tolerance	Out of Tolerance	Out of Tolerance	Match	Out of Tolerance	Match	Unknown	Match	Not Found
L-Valine, TMS derivative	Out of Tolerance	Out of Tolerance	Not Found	Out of Tolerance	Not Found	Not Found	Out of Tolerance	Not Found	Out of Tolerance	Out of Tolerance	Out of Tolerance	Out of Tolerance	Not Found	Match	Unknown	Not Found	Not Found
*Pentanoic acid, 2-(methoxyimino)-3-methyl-, trimethylsilyl ester	Out of Tolerance	Out of Tolerance	Not Found	Out of Tolerance	Out of Tolerance	Not Found	Out of Tolerance	Out of Tolerance	Out of Tolerance	Match	Out of Tolerance	Out of Tolerance	Match	Match	Unknown	Match	Not Found
*Butanoic acid, 2-hydroxy- (2TMS)_M000888_A111002-101-x1[NA]_NA_1111,63_TRUE_VAR5_ALK	Out of Tolerance	Out of Tolerance	Not Found	Out of Tolerance	Not Found	Not Found	Out of Tolerance	Not Found	Match	Match	Match	Out of Tolerance	Not Found	Match	Unknown	Not Found	Out of Tolerance
Leucine (2TMS)_M000025_A129002-101-xxx_NA_1264,43_TRUE_1282,60_MOSYS_TRUE_VAR5_ALK	Out of Tolerance	Out of Tolerance	Out of Tolerance	Out of Tolerance	Out of Tolerance	Match	Out of Tolerance	Out of Tolerance	Out of Tolerance	Out of Tolerance	Out of Tolerance	Out of Tolerance	Out of Tolerance	Match	Unknown	Match	Not Found
*Glucose-6-phosphate (1MEOX) (6TMS) BP_M000513_A235002-101-x1[NA]_NA_2328,97_TRUE_VAR5_ALK	Out of Tolerance	Out of Tolerance	Out of Tolerance	Out of Tolerance	Out of Tolerance	Out of Tolerance	Out of Tolerance	Out of Tolerance	Out of Tolerance	Out of Tolerance	Out of Tolerance	Out of Tolerance	Match	Match	Unknown	Match	Not Found
*Uracil (2TMS)_M000456_A136001-101-x1[NA]_NA_1335,93_TRUE_VAR5_ALK	Out of Tolerance	Out of Tolerance	Out of Tolerance	Out of Tolerance	Out of Tolerance	Out of Tolerance	Out of Tolerance	Out of Tolerance	Out of Tolerance	Out of Tolerance	Out of Tolerance	Out of Tolerance	Match	Match	Unknown	Match	Out of Tolerance
*Unknown#bth-pae-001_M000000_A097001-101-x1[NA]_NA_959,45_PRED_VAR5_ALK	Out of Tolerance	Not Found	Not Found	Out of Tolerance	Out of Tolerance	Not Found	Not Found	Not Found	Out of Tolerance	Out of Tolerance	Out of Tolerance	Out of Tolerance	Not Found	Match	Unknown	Not Found	Not Found
*Methyltris(trimethylsiloxy)silane	Out of Tolerance	Out of Tolerance	Out of Tolerance	Out of Tolerance	Match	Match	Match	Not Found	Out of Tolerance	Match	Match	Out of Tolerance	Out of Tolerance	Match	Unknown	Not Found	Out of Tolerance
*3-Methyl-2-oxopentanoic-acid_2_1MeOX_1TMS_M000000_A119010-101-x1[NA]_NA_1189,12_PRED_VAR5_ALK	Out of Tolerance	Out of Tolerance	Not Found	Out of Tolerance	Out of Tolerance	Not Found	Out of Tolerance	Out of Tolerance	Match	Match	Out of Tolerance	Out of Tolerance	Match	Match	Unknown	Match	Not Found
β-Alanine, 3TMS derivative	Out of Tolerance	Out of Tolerance	Out of Tolerance	Out of Tolerance	Out of Tolerance	Out of Tolerance	Out of Tolerance	Out of Tolerance	Out of Tolerance	Out of Tolerance	Out of Tolerance	Out of Tolerance	Match	Match	Unknown	Match	Not Found
*Benzenamine, N-ethyl-	Match	Match	Not Found	Match	Not Found	Not Found	Out of Tolerance	Not Found	Match	Match	Match	Match	Not Found	Match	Unknown	Not Found	Out of Tolerance
*4-Methyl-1,2-bis(trimethylsilyloxy)pentane	Match	Match	Out of Tolerance	Match	Match	Not Found	Match	Out of Tolerance	Match	Match	Match	Match	Match	Match	Unknown	Out of Tolerance	Out of Tolerance
Glutamine (4TMS)_M000032_A174008-101-x1[NA]_NA_1720,58_TRUE_VAR5_ALK	Out of Tolerance	Out of Tolerance	Not Found	Out of Tolerance	Out of Tolerance	Out of Tolerance	Out of Tolerance	Out of Tolerance	Out of Tolerance	Out of Tolerance	Out of Tolerance	Out of Tolerance	Out of Tolerance	Out of Tolerance	Unknown	Match	Not Found
*Maltotriose (1MEOX) (11TMS) MP_M000269_A355003-101-xxx_NA_3507,56_TRUE_3630,78_MOSYS_PRED_VAR5_ALK	Not Found	Not Found	Not Found	Not Found	Not Found	Not Found	Not Found	Not Found	Not Found	Not Found	Not Found	Not Found	Not Found	Not Found	Unknown	Not Found	Not Found
*Hexasiloxane, tetradecamethyl-	Out of Tolerance	Out of Tolerance	Out of Tolerance	Out of Tolerance	Out of Tolerance	Out of Tolerance	Match	Out of Tolerance	Out of Tolerance	Match	Out of Tolerance	Out of Tolerance	Match	Out of Tolerance	Unknown	Match	Not Found
Glutamine [-H2O] (3TMS) MP_M000032_A160005-101-x1[NA]_NA_1580,83_TRUE_VAR5_ALK	Not Found	Not Found	Not Found	Not Found	Not Found	Out of Tolerance	Not Found	Not Found	Out of Tolerance	Out of Tolerance	Match	Out of Tolerance	Out of Tolerance	Out of Tolerance	Unknown	Out of Tolerance	Not Found
*Unknown#sst-cgl-008_M000000_A124007-101-x1[NA]_NA_1238,44_PRED_VAR5_ALK	Out of Tolerance	Out of Tolerance	Out of Tolerance	Out of Tolerance	Out of Tolerance	Out of Tolerance	Out of Tolerance	Out of Tolerance	Match	Out of Tolerance	Match	Match	Match	Match	Unknown	Match	Out of Tolerance
Dodecane, 4,6-dimethyl-	Match	Match	Out of Tolerance	Match	Match	Match	Match	Out of Tolerance	Out of Tolerance	Out of Tolerance	Out of Tolerance	Out of Tolerance	Out of Tolerance	Match	Unknown	Out of Tolerance	Match
*Lumichrome (2MEOX)_M000872_A133011-101-x1[NA]_NA_1332,56_TRUE_VAR5_ALK	Out of Tolerance	Out of Tolerance	Out of Tolerance	Out of Tolerance	Match	Out of Tolerance	Out of Tolerance	Out of Tolerance	Out of Tolerance	Out of Tolerance	Out of Tolerance	Out of Tolerance	Match	Match	Unknown	Match	Not Found
*Ethanol, 2-butoxy-, phosphate (3:1)	Out of Tolerance	Out of Tolerance	Out of Tolerance	Out of Tolerance	Out of Tolerance	Out of Tolerance	Out of Tolerance	Not Found	Match	Match	Match	Match	Match	Match	Unknown	Match	Out of Tolerance
*Adenosine, 4TMS derivative	Out of Tolerance	Out of Tolerance	Out of Tolerance	Out of Tolerance	Out of Tolerance	Out of Tolerance	Out of Tolerance	Out of Tolerance	Out of Tolerance	Out of Tolerance	Out of Tolerance	Out of Tolerance	Match	Match	Unknown	Match	Out of Tolerance
*Nonane, 2,6-dimethyl-	Out of Tolerance	Not Found	Not Found	Match	Out of Tolerance	Out of Tolerance	Match	Not Found	Not Found	Match	Out of Tolerance	Not Found	Match	Match	Unknown	Not Found	Match
Pyruvic acid (1MEOX) (1TMS)_M000071_A104002-101-xxx_NA_1037,28_TRUE_1065,40_MOSYS_TRUE_VAR5_ALK	Match	Match	Not Found	Out of Tolerance	Not Found	Not Found	Match	Not Found	Match	Match	Out of Tolerance	Match	Not Found	Out of Tolerance	Unknown	Not Found	Not Found
*2-Ethylhexanal ethylene glycol acetal	Out of Tolerance	Out of Tolerance	Out of Tolerance	Out of Tolerance	Out of Tolerance	Match	Out of Tolerance	Out of Tolerance	Out of Tolerance	Out of Tolerance	Out of Tolerance	Out of Tolerance	Match	Match	Unknown	Match	Out of Tolerance
*Glyceric acid-3-phosphate (4TMS)_M000105_A181003-101-x1[NA]_NA_1791,68_TRUE_VAR5_ALK	Out of Tolerance	Out of Tolerance	Match	Out of Tolerance	Match	Out of Tolerance	Match	Out of Tolerance	Out of Tolerance	Match	Out of Tolerance	Out of Tolerance	Out of Tolerance	Out of Tolerance	Unknown	Out of Tolerance	Not Found
*Pyridine, 2-hydroxy- (1TMS)_M000413_A105003-101-xxx_NA_1031,31_TRUE_1031,17_MOSYS_PRED_VAR5_ALK	Out of Tolerance	Out of Tolerance	Not Found	Out of Tolerance	Out of Tolerance	Not Found	Out of Tolerance	Not Found	Out of Tolerance	Match	Out of Tolerance	Out of Tolerance	Not Found	Match	Unknown	Not Found	Out of Tolerance
Decane, 2,2-dimethyl-	Match	Match	Not Found	Match	Out of Tolerance	Not Found	Out of Tolerance	Not Found	Not Found	Match	Match	Match	Match	Match	Unknown	Not Found	Match
*L-Cysteine, 3TMS derivative	Not Found	Not Found	Not Found	Out of Tolerance	Out of Tolerance	Out of Tolerance	Out of Tolerance	Out of Tolerance	Out of Tolerance	Not Found	Out of Tolerance	Out of Tolerance	Out of Tolerance	Match	Unknown	Out of Tolerance	Not Found
*d-Proline, n-propoxycarbonyl-, hexadecyl ester	Not Found	Not Found	Not Found	Not Found	Not Found	Not Found	Not Found	Not Found	Not Found	Not Found	Not Found	Not Found	Not Found	Match	Unknown	Not Found	Not Found
*Methyltris(trimethylsiloxy)silane	Out of Tolerance	Out of Tolerance	Out of Tolerance	Out of Tolerance	Match	Match	Match	Not Found	Out of Tolerance	Match	Match	Out of Tolerance	Out of Tolerance	Match	Unknown	Not Found	Out of Tolerance
*NA_M000000_A148003-101-xxx_NA_1464,64_PRED_1486,09_MOSYS_PRED_VAR5_ALK	Not Found	Out of Tolerance	Out of Tolerance	Out of Tolerance	Out of Tolerance	Not Found	Not Found	Not Found	Out of Tolerance	Match	Out of Tolerance	Out of Tolerance	Out of Tolerance	Not Found	Unknown	Out of Tolerance	Not Found
*3,7-dioxa-2,8-disilanonane, 2,2,8,8-tetramethyl-5,5-bis[[(trimethylsilyl)oxy]methyl]-	Match	Match	Match	Match	Match	Match	Match	Out of Tolerance	Match	Match	Match	Match	Match	Match	Unknown	Match	Match
*L-Methionine, 2TMS derivative	Out of Tolerance	Out of Tolerance	Out of Tolerance	Out of Tolerance	Out of Tolerance	Out of Tolerance	Out of Tolerance	Out of Tolerance	Out of Tolerance	Out of Tolerance	Out of Tolerance	Out of Tolerance	Match	Match	Unknown	Match	Not Found
*Tryptophan, 3TMS derivative	Not Found	Out of Tolerance	Out of Tolerance	Not Found	Not Found	Out of Tolerance	Out of Tolerance	Out of Tolerance	Not Found	Out of Tolerance	Out of Tolerance	Not Found	Match	Match	Unknown	Match	Not Found
*Oxalic acid, 2TMS derivative	Not Found	Out of Tolerance	Not Found	Out of Tolerance	Out of Tolerance	Not Found	Out of Tolerance	Not Found	Out of Tolerance	Match	Match	Match	Out of Tolerance	Match	Unknown	Out of Tolerance	Out of Tolerance
*Butylated Hydroxytoluene, TMS derivative	Out of Tolerance	Out of Tolerance	Out of Tolerance	Out of Tolerance	Out of Tolerance	Out of Tolerance	Out of Tolerance	Out of Tolerance	Match	Match	Not Found	Out of Tolerance	Match	Match	Unknown	Match	Out of Tolerance
*L-Ornithine, 4TMS derivative	Out of Tolerance	Out of Tolerance	Out of Tolerance	Out of Tolerance	Out of Tolerance	Out of Tolerance	Out of Tolerance	Out of Tolerance	Out of Tolerance	Out of Tolerance	Match	Out of Tolerance	Match	Match	Unknown	Match	Not Found
*Thymidine-5'-monophosphoric-acid_3TMS_M000000_A282014-101-x1[NA]_NA_2816,53_PRED_VAR5_ALK	Out of Tolerance	Out of Tolerance	Out of Tolerance	Out of Tolerance	Out of Tolerance	Out of Tolerance	Out of Tolerance	Out of Tolerance	Out of Tolerance	Out of Tolerance	Out of Tolerance	Out of Tolerance	Match	Match	Unknown	Match	Not Found
*Glycolic acid, 2TMS derivative	Match	Out of Tolerance	Not Found	Match	Not Found	Not Found	Out of Tolerance	Out of Tolerance	Match	Match	Match	Match	Out of Tolerance	Match	Unknown	Not Found	Out of Tolerance
Dodecane, 4,6-dimethyl-	Match	Match	Out of Tolerance	Match	Match	Match	Match	Out of Tolerance	Out of Tolerance	Out of Tolerance	Out of Tolerance	Out of Tolerance	Out of Tolerance	Match	Unknown	Out of Tolerance	Match
Methionine (1TMS)_M000018_A142007-101-x1[L-]_NA_1416,46_TRUE_VAR5_ALK	Out of Tolerance	Not Found	Not Found	Not Found	Not Found	Not Found	Not Found	Not Found	Out of Tolerance	Out of Tolerance	Out of Tolerance	Out of Tolerance	Not Found	Match	Unknown	Not Found	Not Found
*D155405_M000000_A155014-101-xxx_NA_1554,13_TRUE_1580,04_MOSYS_PRED_VAR5_ALK	Out of Tolerance	Out of Tolerance	Not Found	Not Found	Out of Tolerance	Not Found	Out of Tolerance	Out of Tolerance	Out of Tolerance	Out of Tolerance	Out of Tolerance	Out of Tolerance	Match	Match	Unknown	Match	Not Found
*Mannose (1MEOX) (5TMS) MP_M000633_A188002-101-xxx_NA_1868,46_TRUE_1910,03_MOSYS_PRED_VAR5_ALK	Out of Tolerance	Not Found	Not Found	Out of Tolerance	Not Found	Not Found	Not Found	Not Found	Not Found	Not Found	Out of Tolerance	Not Found	Out of Tolerance	Out of Tolerance	Unknown	Match	Not Found
L-Glutamic acid, bis(trimethylsilyl) ester	Out of Tolerance	Out of Tolerance	Out of Tolerance	Out of Tolerance	Not Found	Not Found	Out of Tolerance	Out of Tolerance	Out of Tolerance	Out of Tolerance	Out of Tolerance	Out of Tolerance	Out of Tolerance	Match	Unknown	Out of Tolerance	Not Found
*Myristic acid, TMS derivative	Out of Tolerance	Match	Match	Out of Tolerance	Out of Tolerance	Match	Out of Tolerance	Out of Tolerance	Out of Tolerance	Match	Out of Tolerance	Out of Tolerance	Match	Match	Unknown	Match	Out of Tolerance
*1,3-Dihydroxyaceton (1MEOX) (2TMS) MP_M000438_A124003-101-xxx_NA_1242,06_TRUE_1252,42_MOSYS_PRED_VAR5_ALK	Not Found	Not Found	Not Found	Not Found	Not Found	Not Found	Not Found	Not Found	Not Found	Not Found	Not Found	Not Found	Not Found	Not Found	Unknown	Not Found	Not Found
*Nonanoic acid, TMS derivative	Out of Tolerance	Out of Tolerance	Out of Tolerance	Out of Tolerance	Out of Tolerance	Out of Tolerance	Out of Tolerance	Out of Tolerance	Out of Tolerance	Out of Tolerance	Out of Tolerance	Out of Tolerance	Out of Tolerance	Match	Unknown	Out of Tolerance	Out of Tolerance
*2-(Methylmercapto)benzothiazole	Out of Tolerance	Out of Tolerance	Out of Tolerance	Out of Tolerance	Out of Tolerance	Not Found	Not Found	Not Found	Not Found	Out of Tolerance	Out of Tolerance	Out of Tolerance	Match	Match	Unknown	Not Found	Not Found
*Ribulose-5-phosphate (1MEOX) (5TMS) BP_M000769_A211015-101-x1[NA]_NA_2087,72_TRUE_VAR5_ALK	Out of Tolerance	Out of Tolerance	Out of Tolerance	Out of Tolerance	Out of Tolerance	Out of Tolerance	Out of Tolerance	Out of Tolerance	Out of Tolerance	Out of Tolerance	Out of Tolerance	Out of Tolerance	Match	Out of Tolerance	Unknown	Out of Tolerance	Not Found
*Glyceryl-glycoside TMS ether	Out of Tolerance	Out of Tolerance	Out of Tolerance	Out of Tolerance	Out of Tolerance	Out of Tolerance	Out of Tolerance	Out of Tolerance	Out of Tolerance	Out of Tolerance	Out of Tolerance	Out of Tolerance	Match	Match	Unknown	Match	Not Found
*1-(2-(3-Cyclohexenyl)ethyl)silatrane	Out of Tolerance	Out of Tolerance	Out of Tolerance	Out of Tolerance	Out of Tolerance	Not Found	Not Found	Not Found	Out of Tolerance	Out of Tolerance	Out of Tolerance	Not Found	Not Found	Not Found	Unknown	Not Found	Not Found
*Methylal	Out of Tolerance	Out of Tolerance	Out of Tolerance	Out of Tolerance	Out of Tolerance	Not Found	Out of Tolerance	Out of Tolerance	Out of Tolerance	Out of Tolerance	Out of Tolerance	Out of Tolerance	Match	Match	Unknown	Out of Tolerance	Out of Tolerance
L-Lysine, 3TMS derivative	Out of Tolerance	Out of Tolerance	Out of Tolerance	Not Found	Not Found	Not Found	Out of Tolerance	Not Found	Out of Tolerance	Out of Tolerance	Out of Tolerance	Out of Tolerance	Out of Tolerance	Match	Unknown	Out of Tolerance	Not Found
*Isovaleric acid, 2-oxo- (1MEOX) (1TMS) BP_M000449_A121003-101-x1[NA]_NA_1121,66_TRUE_VAR5_ALK	Out of Tolerance	Out of Tolerance	Not Found	Out of Tolerance	Not Found	Not Found	Match	Not Found	Match	Match	Out of Tolerance	Out of Tolerance	Not Found	Out of Tolerance	Unknown	Match	Not Found
*Pentanedioic acid, 2-(methoxyimino)-, bis(trimethylsilyl) ester	Out of Tolerance	Out of Tolerance	Out of Tolerance	Out of Tolerance	Out of Tolerance	Out of Tolerance	Out of Tolerance	Out of Tolerance	Match	Match	Out of Tolerance	Out of Tolerance	Match	Out of Tolerance	Unknown	Match	Not Found
*Glucose-6-phosphate (1MEOX) (6TMS) BP_M000513_A235002-101-xxx_NA_2328,97_TRUE_2393,48_MOSYS_PRED_VAR5_ALK	Out of Tolerance	Out of Tolerance	Out of Tolerance	Out of Tolerance	Out of Tolerance	Out of Tolerance	Out of Tolerance	Out of Tolerance	Out of Tolerance	Out of Tolerance	Out of Tolerance	Out of Tolerance	Match	Match	Unknown	Out of Tolerance	Not Found
*Propanoic acid, 2-amino-2-methyl-3-hydroxy- (3TMS)_M000893_A137008-101-x1[NA]_NA_1375,1_TRUE_VAR5_ALK	Not Found	Not Found	Not Found	Not Found	Not Found	Not Found	Not Found	Out of Tolerance	Out of Tolerance	Out of Tolerance	Out of Tolerance	Out of Tolerance	Not Found	Match	Unknown	Match	Not Found
*Unknown#sst-cgl-004_M000000_A119012-101-x1[NA]_NA_1182,47_PRED_VAR5_ALK	Not Found	Not Found	Not Found	Out of Tolerance	Not Found	Not Found	Not Found	Not Found	Out of Tolerance	Out of Tolerance	Out of Tolerance	Out of Tolerance	Match	Match	Unknown	Match	Not Found
*Diethylene glycol, 2TMS derivative	Match	Match	Out of Tolerance	Match	Out of Tolerance	Out of Tolerance	Out of Tolerance	Out of Tolerance	Match	Match	Match	Not Found	Out of Tolerance	Match	Unknown	Out of Tolerance	Out of Tolerance
Proline (1TMS)_M000029_A117006-101-x1[L-]_NA_1176,03_TRUE_VAR5_ALK	Out of Tolerance	Out of Tolerance	Not Found	Out of Tolerance	Out of Tolerance	Not Found	Out of Tolerance	Out of Tolerance	Not Found	Out of Tolerance	Match	Match	Out of Tolerance	Match	Unknown	Not Found	Not Found
*Nicotinamide (1TMS)_M000271_A150004-101-x1[NA]_NA_1489,26_TRUE_VAR5_ALK	Match	Match	Match	Match	Match	Out of Tolerance	Match	Out of Tolerance	Match	Match	Out of Tolerance	Out of Tolerance	Match	Match	Unknown	Match	Not Found
*Valylvaline, N,N'dimethyl-N'-ethoxycarbonyl-, undecyl ester	Not Found	Not Found	Not Found	Not Found	Not Found	Not Found	Not Found	Not Found	Not Found	Not Found	Not Found	Not Found	Match	Match	Unknown	Not Found	Not Found
Raffinose (11TMS)_M000049_A337002-101-xxx_NA_3350,64_TRUE_3494,90_MOSYS_TRUE_VAR5_ALK	Not Found	Not Found	Not Found	Not Found	Not Found	Not Found	Not Found	Not Found	Not Found	Not Found	Match	Not Found	Not Found	Not Found	Unknown	Not Found	Not Found
*Butanedioic acid, 2TMS derivative	Out of Tolerance	Out of Tolerance	Out of Tolerance	Out of Tolerance	Out of Tolerance	Out of Tolerance	Out of Tolerance	Out of Tolerance	Not Found	Out of Tolerance	Out of Tolerance	Out of Tolerance	Match	Match	Unknown	Match	Out of Tolerance
L-Lysine, 4TMS derivative	Out of Tolerance	Out of Tolerance	Out of Tolerance	Out of Tolerance	Out of Tolerance	Out of Tolerance	Out of Tolerance	Out of Tolerance	Out of Tolerance	Out of Tolerance	Out of Tolerance	Out of Tolerance	Match	Match	Unknown	Match	Out of Tolerance
*D-Limonene	Out of Tolerance	Not Found	Not Found	Not Found	Not Found	Not Found	Match	Not Found	Not Found	Not Found	Not Found	Not Found	Not Found	Not Found	Unknown	Not Found	Not Found
*NA_M000000_A214003-101-xxx_NA_2127,28_PRED_2181,74_MOSYS_PRED_VAR5_ALK	Not Found	Out of Tolerance	Not Found	Out of Tolerance	Out of Tolerance	Out of Tolerance	Not Found	Out of Tolerance	Out of Tolerance	Not Found	Out of Tolerance	Not Found	Match	Out of Tolerance	Unknown	Out of Tolerance	Not Found
*NA_M000000_A304001-101-xxx_NA_3022,95_PRED_3122,03_MOSYS_PRED_VAR5_ALK	Not Found	Match	Match	Match	Match	Match	Match	Match	Out of Tolerance	Match	Match	Match	Match	Match	Unknown	Match	Out of Tolerance
Inosine-5'-monophosphate (5TMS)_M001129_A298003-101-xxx_NA_2984,72_TRUE_3081,90_MOSYS_PRED_VAR5_ALK	Not Found	Not Found	Not Found	Not Found	Not Found	Not Found	Not Found	Not Found	Not Found	Not Found	Not Found	Not Found	Not Found	Not Found	Unknown	Not Found	Not Found
2-Butenedioic acid, (Z)-, 2TMS derivative	Out of Tolerance	Out of Tolerance	Out of Tolerance	Out of Tolerance	Match	Match	Out of Tolerance	Out of Tolerance	Out of Tolerance	Out of Tolerance	Out of Tolerance	Out of Tolerance	Out of Tolerance	Match	Unknown	Match	Out of Tolerance
1,3-Dioxolane	Not Found	Not Found	Match	Match	Match	Match	Match	Not Found	Match	Out of Tolerance	Out of Tolerance	Match	Match	Match	Unknown	Not Found	Match
1-(Palmitoyloxy)-3-((trimethylsilyl)oxy)propan-2-yl (Z)-hexadec-9-enoate	Not Found	Not Found	Not Found	Not Found	Not Found	Not Found	Not Found	Not Found	Not Found	Not Found	Not Found	Not Found	Not Found	Not Found	Unknown	Not Found	Not Found
Muramic acid, N-acetyl- (1MEOX) (4TMS) MP_M001064_A227006-101-x1[NA]_NA_2276,07_TRUE_VAR5_ALK	Not Found	Not Found	Not Found	Not Found	Not Found	Not Found	Out of Tolerance	Not Found	Not Found	Out of Tolerance	Out of Tolerance	Out of Tolerance	Match	Not Found	Unknown	Match	Not Found
Lactobionic acid (TMS) MP_M001097_A279009-101-xxx_NA_2798,1_TRUE_2885,98_MOSYS_PRED_VAR5_ALK	Not Found	Not Found	Not Found	Not Found	Not Found	Not Found	Not Found	Not Found	Not Found	Not Found	Not Found	Not Found	Not Found	Not Found	Unknown	Not Found	Not Found
Ethylene glycol, 2TMS derivative	Match	Match	Not Found	Match	Match	Out of Tolerance	Match	Not Found	Out of Tolerance	Match	Out of Tolerance	Match	Match	Match	Unknown	Not Found	Match
Butanoic acid, 4-methylthio-2-oxo- (1MEOX) (1TMS) MP_M000923_A145013-101-x1[NA]_NA_1454,41_TRUE_VAR5_ALK	Out of Tolerance	Out of Tolerance	Out of Tolerance	Out of Tolerance	Out of Tolerance	Out of Tolerance	Not Found	Out of Tolerance	Out of Tolerance	Match	Out of Tolerance	Out of Tolerance	Match	Match	Unknown	Out of Tolerance	Not Found
Tridecane	Out of Tolerance	Not Found	Not Found	Not Found	Not Found	Not Found	Not Found	Not Found	Not Found	Not Found	Not Found	Not Found	Not Found	Not Found	Unknown	Not Found	Match
Cyclononasiloxane, octadecamethyl-	Match	Out of Tolerance	Match	Match	Not Found	Match	Match	Match	Out of Tolerance	Match	Out of Tolerance	Match	Match	Match	Unknown	Match	Out of Tolerance
3-Carene	Match	Out of Tolerance	Not Found	Out of Tolerance	Out of Tolerance	Not Found	Match	Not Found	Out of Tolerance	Match	Not Found	Out of Tolerance	Match	Out of Tolerance	Unknown	Not Found	Match
2,2-Dimethylpropane-1,3-diol, O,O'-bis(trimethylsilyl)-	Match	Match	Not Found	Out of Tolerance	Not Found	Not Found	Match	Not Found	Out of Tolerance	Match	Match	Out of Tolerance	Not Found	Out of Tolerance	Unknown	Not Found	Out of Tolerance
L-Glutamic acid, 3TMS derivative	Out of Tolerance	Out of Tolerance	Out of Tolerance	Out of Tolerance	Out of Tolerance	Out of Tolerance	Out of Tolerance	Out of Tolerance	Out of Tolerance	Out of Tolerance	Out of Tolerance	Out of Tolerance	Out of Tolerance	Match	Unknown	Not Found	Out of Tolerance
L-Proline, N-(3-methoxybenzoyl)-, undecyl ester	Not Found	Not Found	Match	Not Found	Match	Not Found	Out of Tolerance	Out of Tolerance	Not Found	Not Found	Not Found	Not Found	Not Found	Not Found	Unknown	Not Found	Match
1,3-Dioxolane	Not Found	Not Found	Match	Match	Match	Match	Match	Not Found	Match	Out of Tolerance	Out of Tolerance	Match	Match	Match	Unknown	Not Found	Match
1,3-Propanediol, 2TMS derivative	Match	Match	Not Found	Match	Match	Not Found	Out of Tolerance	Not Found	Match	Match	Match	Match	Not Found	Match	Unknown	Not Found	Out of Tolerance
Phosphoric acid, bis(trimethylsilyl) 2,3-bis[(trimethylsilyl)oxy]propyl ester	Out of Tolerance	Out of Tolerance	Out of Tolerance	Out of Tolerance	Out of Tolerance	Out of Tolerance	Not Found	Out of Tolerance	Out of Tolerance	Out of Tolerance	Out of Tolerance	Out of Tolerance	Match	Match	Unknown	Out of Tolerance	Not Found
Phenylpyruvic acid (1MEOX) (1TMS) MP_M000572_A160002-101-x1[NA]_NA_1591,01_TRUE_VAR5_ALK	Out of Tolerance	Out of Tolerance	Out of Tolerance	Match	Out of Tolerance	Out of Tolerance	Out of Tolerance	Not Found	Out of Tolerance	Match	Out of Tolerance	Out of Tolerance	Match	Not Found	Unknown	Match	Not Found
Hexanoic acid, TMS derivative	Out of Tolerance	Out of Tolerance	Not Found	Out of Tolerance	Not Found	Not Found	Out of Tolerance	Not Found	Out of Tolerance	Match	Out of Tolerance	Match	Not Found	Out of Tolerance	Unknown	Not Found	Out of Tolerance
Ethyl pipecolinate	Out of Tolerance	Not Found	Not Found	Not Found	Not Found	Not Found	Out of Tolerance	Not Found	Out of Tolerance	Out of Tolerance	Out of Tolerance	Out of Tolerance	Match	Out of Tolerance	Unknown	Out of Tolerance	Not Found
Etoxeridine	Out of Tolerance	Not Found	Out of Tolerance	Not Found	Not Found	Out of Tolerance	Not Found	Out of Tolerance	Out of Tolerance	Out of Tolerance	Out of Tolerance	Out of Tolerance	Match	Match	Unknown	Out of Tolerance	Not Found
Boric acid, 3TMS derivative	Not Found	Match	Match	Match	Out of Tolerance	Out of Tolerance	Out of Tolerance	Not Found	Match	Out of Tolerance	Out of Tolerance	Out of Tolerance	Match	Match	Unknown	Not Found	Match
Glyceraldehyde (1MEOX) (2TMS) BP_M000452_A123004-101-x1[S-]_NA_1194,03_TRUE_VAR5_ALK	Not Found	Not Found	Not Found	Not Found	Not Found	Not Found	Not Found	Not Found	Not Found	Not Found	Not Found	Not Found	Not Found	Not Found	Unknown	Not Found	Not Found
Unknown#bth-pae-059_M000000_A107001-101-x1[NA]_NA_1060,6_PRED_VAR5_ALK	Not Found	Not Found	Not Found	Not Found	Not Found	Not Found	Not Found	Not Found	Not Found	Out of Tolerance	Not Found	Out of Tolerance	Out of Tolerance	Match	Unknown	Out of Tolerance	Not Found
Phosphoric acid (3TMS)_M000075_A129001-101-xxx_NA_1262,42_TRUE_1273,79_MOSYS_PRED_VAR5_ALK	Out of Tolerance	Out of Tolerance	Out of Tolerance	Out of Tolerance	Out of Tolerance	Not Found	Not Found	Out of Tolerance	Out of Tolerance	Out of Tolerance	Out of Tolerance	Out of Tolerance	Out of Tolerance	Match	Unknown	Match	Not Found
Hexanedioic acid, bis(2-ethylhexyl) ester	Match	Match	Match	Match	Match	Not Found	Not Found	Not Found	Match	Match	Match	Match	Match	Match	Unknown	Match	Not Found
Uridine (4TMS)_M000273_A246006-101-xxx_NA_2455,91_TRUE_2526,74_MOSYS_PRED_VAR5_ALK	Out of Tolerance	Out of Tolerance	Out of Tolerance	Out of Tolerance	Out of Tolerance	Out of Tolerance	Out of Tolerance	Out of Tolerance	Out of Tolerance	Out of Tolerance	Out of Tolerance	Out of Tolerance	Match	Match	Unknown	Match	Not Found
Unknown#sst-cgl-122_M000000_A266012-101-xxx_NA_2659,18_PRED_2740,14_MOSYS_PRED_VAR5_ALK	Not Found	Not Found	Not Found	Not Found	Not Found	Not Found	Not Found	Not Found	Not Found	Not Found	Not Found	Not Found	Not Found	Not Found	Unknown	Not Found	Not Found
Propylene glycol, 2TMS derivative	Out of Tolerance	Out of Tolerance	Not Found	Out of Tolerance	Not Found	Out of Tolerance	Match	Not Found	Out of Tolerance	Match	Out of Tolerance	Out of Tolerance	Not Found	Out of Tolerance	Unknown	Not Found	Not Found
Carbodiimide (2TMS)_M000836_A100005-101-xxx_NA_953,17_PRED_949,14_MOSYS_PRED_VAR5_ALK	Out of Tolerance	Out of Tolerance	Match	Out of Tolerance	Match	Match	Out of Tolerance	Out of Tolerance	Out of Tolerance	Match	Not Found	Out of Tolerance	Out of Tolerance	Out of Tolerance	Unknown	Match	Not Found
Propane, 2-methyl-1-nitro-	Not Found	Not Found	Not Found	Not Found	Not Found	Not Found	Not Found	Not Found	Not Found	Not Found	Not Found	Not Found	Not Found	Not Found	Unknown	Not Found	Not Found
Pentadecane	Out of Tolerance	Out of Tolerance	Out of Tolerance	Match	Out of Tolerance	Match	Not Found	Not Found	Match	Out of Tolerance	Match	Out of Tolerance	Out of Tolerance	Out of Tolerance	Unknown	Out of Tolerance	Out of Tolerance
Cadaverine, 4TMS derivative	Out of Tolerance	Out of Tolerance	Out of Tolerance	Out of Tolerance	Match	Match	Match	Out of Tolerance	Out of Tolerance	Match	Out of Tolerance	Out of Tolerance	Match	Match	Unknown	Match	Not Found
N-Acetyl-D-galactosamine, (isomer 2), 4TMS derivative	Out of Tolerance	Out of Tolerance	Out of Tolerance	Out of Tolerance	Out of Tolerance	Not Found	Out of Tolerance	Not Found	Out of Tolerance	Out of Tolerance	Out of Tolerance	Out of Tolerance	Out of Tolerance	Match	Unknown	Match	Not Found
2,4-Dimethyldodecane	Match	Out of Tolerance	Out of Tolerance	Out of Tolerance	Match	Match	Match	Not Found	Out of Tolerance	Match	Out of Tolerance	Out of Tolerance	Out of Tolerance	Out of Tolerance	Unknown	Out of Tolerance	Match
(Z)-Docos-9-enenitrile	Out of Tolerance	Out of Tolerance	Out of Tolerance	Out of Tolerance	Out of Tolerance	Out of Tolerance	Match	Not Found	Out of Tolerance	Out of Tolerance	Out of Tolerance	Not Found	Out of Tolerance	Match	Unknown	Match	Out of Tolerance
Azulene	Not Found	Not Found	Not Found	Not Found	Not Found	Not Found	Not Found	Not Found	Not Found	Not Found	Not Found	Not Found	Not Found	Not Found	Unknown	Not Found	Not Found
Vinyl ether	Not Found	Not Found	Not Found	Not Found	Not Found	Not Found	Not Found	Not Found	Not Found	Not Found	Not Found	Not Found	Not Found	Match	Unknown	Not Found	Not Found
2-Ethylhexanal ethylene glycol acetal	Out of Tolerance	Out of Tolerance	Out of Tolerance	Out of Tolerance	Out of Tolerance	Match	Out of Tolerance	Out of Tolerance	Out of Tolerance	Out of Tolerance	Out of Tolerance	Out of Tolerance	Match	Match	Unknown	Match	Out of Tolerance
Tridecane, 2-methyl-	Out of Tolerance	Match	Match	Match	Match	Out of Tolerance	Match	Out of Tolerance	Match	Match	Match	Match	Match	Match	Unknown	Match	Match
2-Ethylhexanal ethylene glycol acetal	Out of Tolerance	Out of Tolerance	Out of Tolerance	Out of Tolerance	Out of Tolerance	Match	Out of Tolerance	Out of Tolerance	Out of Tolerance	Out of Tolerance	Out of Tolerance	Out of Tolerance	Match	Match	Unknown	Match	Out of Tolerance
2-Methyl-1,3-propanediol, 2TMS derivative	Out of Tolerance	Not Found	Not Found	Not Found	Match	Not Found	Out of Tolerance	Not Found	Not Found	Match	Match	Not Found	Match	Match	Unknown	Match	Not Found
1-(2-(3-Cyclohexenyl)ethyl)silatrane	Not Found	Not Found	Not Found	Not Found	Not Found	Not Found	Not Found	Not Found	Not Found	Not Found	Not Found	Not Found	Not Found	Not Found	Unknown	Not Found	Not Found
Heptasiloxane, hexadecamethyl-	Match	Match	Out of Tolerance	Out of Tolerance	Match	Match	Match	Out of Tolerance	Match	Match	Match	Match	Match	Match	Unknown	Match	Match
Tridecane	Out of Tolerance	Not Found	Not Found	Not Found	Not Found	Not Found	Not Found	Not Found	Not Found	Not Found	Not Found	Not Found	Not Found	Not Found	Unknown	Not Found	Match
Diethylene glycol, isobutyl ether, trimethylsilyl ether	Match	Out of Tolerance	Match	Match	Match	Not Found	Out of Tolerance	Out of Tolerance	Not Found	Match	Not Found	Match	Match	Out of Tolerance	Unknown	Out of Tolerance	Out of Tolerance
1,2-Benzenedicarboxylic acid, bis(2-ethylhexyl) ester	Match	Not Found	Out of Tolerance	Match	Not Found	Not Found	Not Found	Not Found	Not Found	Not Found	Not Found	Not Found	Not Found	Not Found	Unknown	Not Found	Out of Tolerance
1,3-Dioxolane	Not Found	Not Found	Match	Match	Match	Match	Match	Not Found	Match	Out of Tolerance	Out of Tolerance	Match	Match	Match	Unknown	Not Found	Match
Methoxyamine, TMS derivative	Out of Tolerance	Out of Tolerance	Not Found	Match	Not Found	Not Found	Out of Tolerance	Not Found	Match	Match	Match	Match	Not Found	Match	Unknown	Not Found	Out of Tolerance
Fructose-1,6-diphosphate (1MEOX) (7TMS) BP_M000511_A272001-101-xxx_NA_2714,26_PRED_2797,96_MOSYS_PRED_VAR5_ALK	Not Found	Not Found	Not Found	Not Found	Not Found	Not Found	Not Found	Not Found	Not Found	Not Found	Not Found	Not Found	Not Found	Out of Tolerance	Unknown	Not Found	Not Found
L-Isoleucine, 2TMS derivative	Out of Tolerance	Out of Tolerance	Out of Tolerance	Out of Tolerance	Out of Tolerance	Out of Tolerance	Out of Tolerance	Out of Tolerance	Out of Tolerance	Out of Tolerance	Not Found	Not Found	Out of Tolerance	Match	Unknown	Match	Not Found
Ornithine-1,5-lactam (2TMS)_M000728_A147003-101-x1[NA]_NA_1454,09_PRED_VAR5_ALK	Out of Tolerance	Out of Tolerance	Out of Tolerance	Not Found	Out of Tolerance	Out of Tolerance	Not Found	Out of Tolerance	Out of Tolerance	Out of Tolerance	Match	Out of Tolerance	Match	Match	Unknown	Match	Not Found
Dodecanol_1TMS_M000000_A157019-101-x1[NA]_NA_1564,92_PRED_VAR5_ALK	Match	Out of Tolerance	Out of Tolerance	Out of Tolerance	Out of Tolerance	Out of Tolerance	Out of Tolerance	Out of Tolerance	Match	Out of Tolerance	Match	Out of Tolerance	Match	Match	Unknown	Out of Tolerance	Match
Glucose, 5TMS derivative	Not Found	Not Found	Not Found	Not Found	Not Found	Not Found	Not Found	Not Found	Not Found	Not Found	Not Found	Not Found	Match	Not Found	Unknown	Not Found	Not Found
Decane, 2,3,5,8-tetramethyl-	Out of Tolerance	Match	Match	Match	Match	Match	Match	Out of Tolerance	Match	Match	Match	Match	Match	Match	Unknown	Match	Out of Tolerance
Nonane, 5-methyl-5-propyl-	Not Found	Not Found	Not Found	Not Found	Not Found	Not Found	Not Found	Out of Tolerance	Not Found	Not Found	Not Found	Not Found	Not Found	Not Found	Unknown	Not Found	Not Found
Decane, 2,9-dimethyl-	Not Found	Not Found	Not Found	Not Found	Not Found	Not Found	Not Found	Not Found	Not Found	Not Found	Not Found	Not Found	Not Found	Not Found	Unknown	Not Found	Not Found
Dodecane, 6-methyl-	Not Found	Not Found	Not Found	Match	Not Found	Out of Tolerance	Not Found	Not Found	Not Found	Not Found	Not Found	Not Found	Not Found	Not Found	Unknown	Not Found	Match
Methylal	Not Found	Out of Tolerance	Not Found	Not Found	Not Found	Not Found	Not Found	Not Found	Not Found	Out of Tolerance	Not Found	Not Found	Match	Not Found	Unknown	Out of Tolerance	Not Found
Unknown#bth-pae-008_M000000_A103003-101-xxx_NA_1019,45_PRED_1018,72_MOSYS_PRED_VAR5_ALK	Not Found	Not Found	Not Found	Not Found	Not Found	Not Found	Not Found	Out of Tolerance	Not Found	Not Found	Not Found	Not Found	Not Found	Not Found	Unknown	Match	Not Found
3-Ethyl-3-methylheptane	Not Found	Not Found	Not Found	Not Found	Not Found	Not Found	Not Found	Not Found	Not Found	Not Found	Not Found	Not Found	Not Found	Not Found	Unknown	Not Found	Not Found
Adenosine (3TMS) (Derivate not found)_M000287_A261002-101-x1[NA]_NA_2612,19_PRED_VAR5_ALK	Out of Tolerance	Out of Tolerance	Out of Tolerance	Out of Tolerance	Out of Tolerance	Out of Tolerance	Out of Tolerance	Not Found	Out of Tolerance	Out of Tolerance	Out of Tolerance	Out of Tolerance	Match	Not Found	Unknown	Out of Tolerance	Not Found
Cyclotetrasiloxane, octamethyl-	Match	Match	Not Found	Match	Match	Match	Match	Not Found	Out of Tolerance	Not Found	Match	Match	Match	Match	Unknown	Not Found	Out of Tolerance
Valine, N-methyl-N-methoxycarbonyl-, octyl ester	Out of Tolerance	Out of Tolerance	Out of Tolerance	Out of Tolerance	Out of Tolerance	Out of Tolerance	Out of Tolerance	Out of Tolerance	Out of Tolerance	Out of Tolerance	Out of Tolerance	Out of Tolerance	Match	Match	Unknown	Out of Tolerance	Not Found
L-Methionine Sulfoxide, N,N-bis(triimethylsilyl)-, trimethylsilyl ester	Not Found	Not Found	Not Found	Not Found	Not Found	Not Found	Not Found	Not Found	Out of Tolerance	Out of Tolerance	Not Found	Out of Tolerance	Out of Tolerance	Out of Tolerance	Unknown	Match	Not Found
Diamide	Out of Tolerance	Out of Tolerance	Not Found	Out of Tolerance	Not Found	Not Found	Out of Tolerance	Not Found	Out of Tolerance	Out of Tolerance	Out of Tolerance	Out of Tolerance	Not Found	Match	Unknown	Out of Tolerance	Not Found
Putrescine (4TMS)_M000186_A175002-101-xxx_NA_1734,98_TRUE_1754,00_MOSYS_TRUE_VAR5_ALK	Match	Match	Out of Tolerance	Match	Out of Tolerance	Match	Match	Out of Tolerance	Match	Out of Tolerance	Out of Tolerance	Match	Match	Match	Unknown	Match	Not Found
Cyclopentasiloxane, decamethyl-	Not Found	Not Found	Out of Tolerance	Not Found	Out of Tolerance	Not Found	Match	Out of Tolerance	Out of Tolerance	Not Found	Out of Tolerance	Match	Out of Tolerance	Out of Tolerance	Unknown	Match	Not Found
D260482_M000000_A260006-101-xxx_NA_2604,01_TRUE_2682,22_MOSYS_PRED_VAR5_ALK	Match	Match	Match	Match	Match	Out of Tolerance	Out of Tolerance	Out of Tolerance	Match	Match	Match	Match	Match	Match	Unknown	Match	Out of Tolerance
Unknown#bth-pae-008_M000000_A103003-101-xxx_NA_1019,45_PRED_1018,72_MOSYS_PRED_VAR5_ALK	Not Found	Not Found	Not Found	Not Found	Not Found	Not Found	Not Found	Out of Tolerance	Not Found	Not Found	Not Found	Not Found	Not Found	Not Found	Unknown	Match	Not Found
2-Pyrrolidinone, 1-methyl-	Not Found	Not Found	Not Found	Not Found	Not Found	Not Found	Not Found	Not Found	Not Found	Not Found	Not Found	Not Found	Not Found	Not Found	Unknown	Not Found	Not Found
Heneicosane, n-_M000548_A210012-101-x1[n-]_NA_2102,8_PRED_VAR5_ALK	Match	Out of Tolerance	Not Found	Match	Not Found	Out of Tolerance	Not Found	Not Found	Out of Tolerance	Out of Tolerance	Match	Not Found	Not Found	Match	Unknown	Match	Out of Tolerance
Tetracosamethyl-cyclododecasiloxane	Not Found	Not Found	Not Found	Not Found	Not Found	Not Found	Not Found	Not Found	Not Found	Not Found	Not Found	Not Found	Not Found	Not Found	Unknown	Not Found	Not Found
Ethanolamine, 2TMS derivative	Not Found	Not Found	Not Found	Not Found	Not Found	Not Found	Not Found	Out of Tolerance	Not Found	Not Found	Not Found	Not Found	Not Found	Not Found	Unknown	Not Found	Not Found
4-Hydroxybutanoic acid, 2TMS derivative	Out of Tolerance	Out of Tolerance	Not Found	Out of Tolerance	Not Found	Not Found	Out of Tolerance	Not Found	Not Found	Out of Tolerance	Out of Tolerance	Out of Tolerance	Not Found	Match	Unknown	Match	Not Found
Hexadecane	Match	Out of Tolerance	Out of Tolerance	Out of Tolerance	Out of Tolerance	Match	Out of Tolerance	Out of Tolerance	Match	Out of Tolerance	Match	Out of Tolerance	Out of Tolerance	Out of Tolerance	Unknown	Out of Tolerance	Match
Glycine, di-TMS	Not Found	Not Found	Not Found	Not Found	Not Found	Not Found	Not Found	Not Found	Out of Tolerance	Out of Tolerance	Out of Tolerance	Out of Tolerance	Not Found	Match	Unknown	Not Found	Not Found
2-Bromo dodecane	Not Found	Not Found	Not Found	Not Found	Not Found	Out of Tolerance	Not Found	Not Found	Not Found	Not Found	Not Found	Not Found	Not Found	Not Found	Unknown	Not Found	Out of Tolerance
1-(2-(3-Cyclohexenyl)ethyl)silatrane	Not Found	Not Found	Not Found	Not Found	Not Found	Not Found	Not Found	Not Found	Not Found	Not Found	Not Found	Not Found	Not Found	Not Found	Unknown	Not Found	Not Found
Disiloxane, hexamethyl-	Out of Tolerance	Out of Tolerance	Out of Tolerance	Not Found	Not Found	Out of Tolerance	Out of Tolerance	Out of Tolerance	Out of Tolerance	Not Found	Out of Tolerance	Out of Tolerance	Match	Out of Tolerance	Unknown	Out of Tolerance	Not Found
1,2-Benzisothiazole	Not Found	Not Found	Not Found	Not Found	Not Found	Not Found	Not Found	Not Found	Not Found	Not Found	Not Found	Not Found	Not Found	Not Found	Unknown	Not Found	Not Found
1-Octylsilatrane	Not Found	Not Found	Not Found	Not Found	Not Found	Not Found	Not Found	Not Found	Not Found	Not Found	Not Found	Not Found	Not Found	Not Found	Unknown	Not Found	Not Found
Homocysteine (3TMS)_M000021_A167001-101-x1[NA]_NA_1662,83_TRUE_VAR5_ALK	Out of Tolerance	Out of Tolerance	Out of Tolerance	Out of Tolerance	Out of Tolerance	Out of Tolerance	Out of Tolerance	Not Found	Out of Tolerance	Out of Tolerance	Out of Tolerance	Out of Tolerance	Match	Match	Unknown	Match	Not Found
Heptadecane, 2,6,10,15-tetramethyl-	Match	Out of Tolerance	Out of Tolerance	Match	Match	Match	Match	Out of Tolerance	Match	Match	Match	Match	Match	Match	Unknown	Match	Match
Undecane, 3,7-dimethyl-	Match	Match	Out of Tolerance	Match	Match	Match	Match	Out of Tolerance	Out of Tolerance	Match	Out of Tolerance	Out of Tolerance	Out of Tolerance	Match	Unknown	Out of Tolerance	Match
Tridecane	Out of Tolerance	Not Found	Not Found	Not Found	Not Found	Not Found	Not Found	Not Found	Not Found	Not Found	Not Found	Not Found	Not Found	Not Found	Unknown	Not Found	Match
Phosphoric acid, bis(trimethylsilyl)monomethyl ester	Match	Out of Tolerance	Out of Tolerance	Match	Out of Tolerance	Not Found	Match	Out of Tolerance	Out of Tolerance	Match	Out of Tolerance	Out of Tolerance	Match	Match	Unknown	Out of Tolerance	Out of Tolerance
Alanine [+CO2] (2TMS)_M000000_A142001-101-x1[DL-]_NA_1395,2_PRED_VAR5_ALK	Not Found	Not Found	Not Found	Out of Tolerance	Not Found	Not Found	Not Found	Not Found	Match	Out of Tolerance	Out of Tolerance	Out of Tolerance	Not Found	Match	Unknown	Not Found	Not Found
DL-Phenylalanine, TMS derivative	Out of Tolerance	Not Found	Not Found	Out of Tolerance	Not Found	Not Found	Not Found	Not Found	Out of Tolerance	Not Found	Out of Tolerance	Out of Tolerance	Not Found	Match	Unknown	Out of Tolerance	Not Found
Benzenepropanoic acid, α-(methoxyimino)-4-[(trimethylsilyl)oxy]-, trimethylsilyl ester	Out of Tolerance	Out of Tolerance	Out of Tolerance	Out of Tolerance	Out of Tolerance	Out of Tolerance	Out of Tolerance	Out of Tolerance	Out of Tolerance	Match	Out of Tolerance	Out of Tolerance	Match	Match	Unknown	Match	Not Found
Ornithine, N2-acetyl- (4TMS)_M000409_A189020-101-xxx_NA_1965,41_TRUE_2011,81_MOSYS_PRED_VAR5_ALK	Not Found	Not Found	Not Found	Not Found	Not Found	Not Found	Not Found	Not Found	Out of Tolerance	Out of Tolerance	Out of Tolerance	Out of Tolerance	Match	Out of Tolerance	Unknown	Match	Not Found
Siloxane_M000870_A225011-101-xxx_NA_2256,43_PRED_2317,32_MOSYS_PRED_VAR5_ALK	Not Found	Not Found	Not Found	Not Found	Not Found	Not Found	Not Found	Not Found	Not Found	Not Found	Not Found	Not Found	Not Found	Not Found	Unknown	Not Found	Not Found
Hexadecyl octyl ether	Not Found	Not Found	Not Found	Not Found	Not Found	Not Found	Not Found	Not Found	Not Found	Not Found	Not Found	Not Found	Not Found	Not Found	Unknown	Not Found	Not Found
Heneicosane, n-_M000548_A210012-101-x1[n-]_NA_2102,8_PRED_VAR5_ALK	Match	Out of Tolerance	Not Found	Match	Not Found	Out of Tolerance	Not Found	Not Found	Out of Tolerance	Out of Tolerance	Match	Not Found	Not Found	Match	Unknown	Match	Out of Tolerance
Succinic semialdehyde (1MEOX) (1TMS) BP_M000397_A118003-101-x1[NA]_NA_1182,03_TRUE_VAR5_ALK	Out of Tolerance	Out of Tolerance	Not Found	Out of Tolerance	Not Found	Not Found	Out of Tolerance	Match	Out of Tolerance	Out of Tolerance	Out of Tolerance	Out of Tolerance	Out of Tolerance	Out of Tolerance	Unknown	Not Found	Not Found
Fructose-1,6-diphosphate (1MEOX) (7TMS) MP_M000511_A272002-101-xxx_NA_2708,96_PRED_2792,40_MOSYS_PRED_VAR5_ALK	Not Found	Not Found	Not Found	Not Found	Not Found	Not Found	Not Found	Not Found	Not Found	Not Found	Not Found	Not Found	Match	Match	Unknown	Not Found	Not Found
Phenol, 2-methoxy-5-[(1,2,3,4-tetrahydro-6,7-dimethoxy-2-methyl-1-isoquinolinyl)methyl]-, (S)-	Out of Tolerance	Match	Out of Tolerance	Match	Out of Tolerance	Out of Tolerance	Out of Tolerance	Out of Tolerance	Out of Tolerance	Out of Tolerance	Out of Tolerance	Out of Tolerance	Out of Tolerance	Match	Unknown	Out of Tolerance	Out of Tolerance
Benzenecarbothioic acid, 2,4,6-triethyl-, S-(2-phenylethyl) ester	Not Found	Not Found	Not Found	Not Found	Not Found	Not Found	Not Found	Not Found	Not Found	Not Found	Not Found	Not Found	Not Found	Out of Tolerance	Unknown	Out of Tolerance	Not Found
Alanyl-alanine (2TMS)_M000937_A160013-101-x1[L-, L-]_NA_1600,7_TRUE_VAR5_ALK	Out of Tolerance	Out of Tolerance	Not Found	Out of Tolerance	Out of Tolerance	Out of Tolerance	Out of Tolerance	Out of Tolerance	Out of Tolerance	Out of Tolerance	Out of Tolerance	Out of Tolerance	Match	Match	Unknown	Match	Not Found
NA168015 (classified unknown)_M000000_A168015-101-xxx_NA_1679,79_TRUE_1711,96_MOSYS_PRED_VAR5_ALK	Match	Match	Match	Match	Match	Match	Out of Tolerance	Out of Tolerance	Out of Tolerance	Out of Tolerance	Out of Tolerance	Out of Tolerance	Not Found	Not Found	Unknown	Match	Not Found
5'-Methylthioadenosine, 3TMS derivative	Out of Tolerance	Out of Tolerance	Out of Tolerance	Out of Tolerance	Match	Match	Out of Tolerance	Out of Tolerance	Out of Tolerance	Out of Tolerance	Out of Tolerance	Out of Tolerance	Match	Match	Unknown	Out of Tolerance	Not Found
1-(2-(3-Cyclohexenyl)ethyl)silatrane	Not Found	Not Found	Not Found	Not Found	Not Found	Not Found	Not Found	Not Found	Not Found	Not Found	Not Found	Not Found	Not Found	Not Found	Unknown	Not Found	Not Found
Silanol, trimethyl-, phosphate (3:1)	Out of Tolerance	Out of Tolerance	Out of Tolerance	Out of Tolerance	Out of Tolerance	Out of Tolerance	Out of Tolerance	Out of Tolerance	Out of Tolerance	Out of Tolerance	Out of Tolerance	Out of Tolerance	Match	Out of Tolerance	Unknown	Match	Out of Tolerance
NA_M000000_A354003-101-xxx_NA_3535,28_PRED_3659,88_MOSYS_PRED_VAR5_ALK	Not Found	Not Found	Not Found	Not Found	Not Found	Not Found	Not Found	Not Found	Not Found	Not Found	Not Found	Not Found	Not Found	Match	Unknown	Match	Not Found
Glycine (3TMS)_M000031_A133001-101-xxx_NA_1302,5_TRUE_1317,50_MOSYS_TRUE_VAR5_ALK	Out of Tolerance	Out of Tolerance	Out of Tolerance	Out of Tolerance	Out of Tolerance	Out of Tolerance	Out of Tolerance	Out of Tolerance	Out of Tolerance	Out of Tolerance	Out of Tolerance	Out of Tolerance	Match	Match	Unknown	Out of Tolerance	Not Found
D164543_M000000_A164017-101-xxx_NA_1645,42_TRUE_1675,87_MOSYS_PRED_VAR5_ALK	Not Found	Not Found	Not Found	Not Found	Not Found	Not Found	Not Found	Not Found	Not Found	Not Found	Not Found	Not Found	Match	Match	Unknown	Match	Not Found
Cycloheptasiloxane, tetradecamethyl-	Out of Tolerance	Out of Tolerance	Out of Tolerance	Out of Tolerance	Out of Tolerance	Not Found	Match	Out of Tolerance	Out of Tolerance	Out of Tolerance	Out of Tolerance	Out of Tolerance	Match	Out of Tolerance	Unknown	Match	Not Found
Siloxane_M000870_A259009-101-xxx_NA_2596,74_PRED_2674,59_MOSYS_PRED_VAR5_ALK	Out of Tolerance	Out of Tolerance	Out of Tolerance	Out of Tolerance	Out of Tolerance	Out of Tolerance	Out of Tolerance	Out of Tolerance	Out of Tolerance	Match	Out of Tolerance	Match	Match	Not Found	Unknown	Match	Out of Tolerance
3-Trimethylsiloxyvaleric acid, trimethylsilyl ester	Not Found	Not Found	Not Found	Not Found	Not Found	Not Found	Not Found	Not Found	Not Found	Not Found	Not Found	Not Found	Not Found	Not Found	Unknown	Not Found	Not Found
Citric acid, 4TMS derivative	Out of Tolerance	Out of Tolerance	Out of Tolerance	Out of Tolerance	Out of Tolerance	Out of Tolerance	Out of Tolerance	Out of Tolerance	Match	Match	Out of Tolerance	Match	Out of Tolerance	Match	Unknown	Match	Out of Tolerance
Dodecane, 4,6-dimethyl-	Match	Match	Out of Tolerance	Match	Match	Match	Match	Out of Tolerance	Out of Tolerance	Out of Tolerance	Out of Tolerance	Out of Tolerance	Out of Tolerance	Match	Unknown	Out of Tolerance	Match
Hypoxanthine (2TMS)_M000294_A182006-101-x1[NA]_NA_1808,98_TRUE_VAR5_ALK	Out of Tolerance	Out of Tolerance	Out of Tolerance	Not Found	Out of Tolerance	Out of Tolerance	Not Found	Out of Tolerance	Match	Out of Tolerance	Out of Tolerance	Not Found	Not Found	Match	Unknown	Match	Not Found
N,N-Diethylheptylamine	Not Found	Not Found	Out of Tolerance	Not Found	Not Found	Not Found	Out of Tolerance	Not Found	Not Found	Out of Tolerance	Not Found	Not Found	Not Found	Not Found	Unknown	Out of Tolerance	Not Found
Siloxane_M000870_A183010-101-xxx_NA_1828,56_PRED_1868,14_MOSYS_PRED_VAR5_ALK	Not Found	Not Found	Not Found	Not Found	Out of Tolerance	Out of Tolerance	Out of Tolerance	Not Found	Not Found	Out of Tolerance	Not Found	Match	Match	Not Found	Unknown	Out of Tolerance	Not Found
D278931_M000000_A278013-101-xxx_NA_2788,69_TRUE_2876,10_MOSYS_PRED_VAR5_ALK	Out of Tolerance	Match	Out of Tolerance	Match	Match	Out of Tolerance	Out of Tolerance	Out of Tolerance	Match	Match	Out of Tolerance	Out of Tolerance	Match	Match	Unknown	Out of Tolerance	Out of Tolerance
Sucrose, 8TMS derivative	Out of Tolerance	Out of Tolerance	Not Found	Not Found	Out of Tolerance	Out of Tolerance	Out of Tolerance	Out of Tolerance	Out of Tolerance	Not Found	Out of Tolerance	Out of Tolerance	Match	Out of Tolerance	Unknown	Match	Not Found
D-Fructose, 1,3,4,5,6-pentakis-O-(trimethylsilyl)-, O-methyloxime	Not Found	Not Found	Not Found	Not Found	Not Found	Not Found	Not Found	Not Found	Not Found	Not Found	Not Found	Not Found	Match	Out of Tolerance	Unknown	Not Found	Not Found
Pipecolic acid, N-ethoxycarbonyl-, dodecyl ester	Out of Tolerance	Out of Tolerance	Out of Tolerance	Out of Tolerance	Match	Out of Tolerance	Out of Tolerance	Not Found	Out of Tolerance	Match	Out of Tolerance	Out of Tolerance	Out of Tolerance	Match	Unknown	Out of Tolerance	Not Found
Pyrene, 1,9-dimethyl-	Not Found	Out of Tolerance	Out of Tolerance	Not Found	Not Found	Out of Tolerance	Out of Tolerance	Out of Tolerance	Not Found	Not Found	Not Found	Not Found	Not Found	Not Found	Unknown	Not Found	Not Found
Undecane, 4,7-dimethyl-	Not Found	Out of Tolerance	Out of Tolerance	Out of Tolerance	Out of Tolerance	Out of Tolerance	Not Found	Not Found	Not Found	Out of Tolerance	Not Found	Not Found	Out of Tolerance	Match	Unknown	Not Found	Out of Tolerance
{[2-(Trichloromethyl)-1,3-dioxane-5,5-diyl]bis(methanediyloxy)}bis(trimethylsilane)	Match	Match	Out of Tolerance	Match	Match	Match	Match	Out of Tolerance	Match	Match	Out of Tolerance	Out of Tolerance	Match	Match	Unknown	Out of Tolerance	Out of Tolerance
d-Proline, N-methoxycarbonyl-, pentyl ester	Out of Tolerance	Out of Tolerance	Out of Tolerance	Out of Tolerance	Out of Tolerance	Out of Tolerance	Out of Tolerance	Out of Tolerance	Out of Tolerance	Out of Tolerance	Out of Tolerance	Out of Tolerance	Out of Tolerance	Not Found	Unknown	Not Found	Out of Tolerance
Xylobiose, D- (1MEOX) (6TMS) BP2_M000720_A242004-101-xxx_NA_2422,7_PRED_2491,88_MOSYS_PRED_VAR5_ALK	Not Found	Not Found	Not Found	Not Found	Not Found	Out of Tolerance	Out of Tolerance	Not Found	Out of Tolerance	Out of Tolerance	Out of Tolerance	Out of Tolerance	Not Found	Match	Unknown	Match	Not Found
NA_M000000_A239003-101-xxx_NA_2384,42_PRED_2451,69_MOSYS_PRED_VAR5_ALK	Not Found	Not Found	Not Found	Not Found	Not Found	Not Found	Not Found	Not Found	Out of Tolerance	Not Found	Not Found	Not Found	Match	Not Found	Unknown	Not Found	Not Found
Siloxane_M000870_A225011-101-xxx_NA_2256,43_PRED_2317,32_MOSYS_PRED_VAR5_ALK	Not Found	Not Found	Not Found	Not Found	Not Found	Not Found	Not Found	Not Found	Not Found	Not Found	Not Found	Not Found	Not Found	Not Found	Unknown	Not Found	Not Found
Diethanolamine, 3TMS derivative	Match	Match	Match	Match	Out of Tolerance	Out of Tolerance	Not Found	Out of Tolerance	Match	Match	Out of Tolerance	Out of Tolerance	Out of Tolerance	Match	Unknown	Match	Out of Tolerance
1,3-Dioxolane	Not Found	Not Found	Match	Match	Match	Match	Match	Not Found	Match	Out of Tolerance	Out of Tolerance	Match	Match	Match	Unknown	Not Found	Match
Cyclooctasiloxane, hexadecamethyl-	Not Found	Out of Tolerance	Not Found	Out of Tolerance	Not Found	Out of Tolerance	Not Found	Out of Tolerance	Not Found	Match	Out of Tolerance	Match	Match	Out of Tolerance	Unknown	Match	Out of Tolerance
Siloxane_M000870_A271010-101-xxx_NA_2716,61_PRED_2800,43_MOSYS_PRED_VAR5_ALK	Match	Match	Out of Tolerance	Match	Out of Tolerance	Out of Tolerance	Out of Tolerance	Out of Tolerance	Out of Tolerance	Out of Tolerance	Out of Tolerance	Out of Tolerance	Out of Tolerance	Out of Tolerance	Unknown	Match	Out of Tolerance
Mannose-6-phosphate (1MEOX) (6TMS) BP_M000711_A233001-101-x1[D-]_NA_2313,44_TRUE_VAR5_ALK	Not Found	Not Found	Not Found	Not Found	Not Found	Not Found	Not Found	Not Found	Not Found	Not Found	Not Found	Not Found	Not Found	Not Found	Unknown	Not Found	Not Found
Allantoin (4TMS)_M000092_A189007-101-xxx_NA_1876,44_PRED_1918,40_MOSYS_PRED_VAR5_ALK	Out of Tolerance	Out of Tolerance	Out of Tolerance	Out of Tolerance	Out of Tolerance	Out of Tolerance	Out of Tolerance	Out of Tolerance	Out of Tolerance	Out of Tolerance	Out of Tolerance	Out of Tolerance	Out of Tolerance	Match	Unknown	Match	Not Found
Fructose-6-phosphate (1MEOX) (6TMS) MP_M000510_A232002-101-xxx_NA_2292,48_TRUE_2355,17_MOSYS_PRED_VAR5_ALK	Not Found	Not Found	Not Found	Not Found	Not Found	Not Found	Not Found	Not Found	Not Found	Not Found	Not Found	Not Found	Not Found	Out of Tolerance	Unknown	Not Found	Not Found
1H-Pyrrole-2,5-dicarbonitrile	Not Found	Match	Out of Tolerance	Match	Not Found	Not Found	Match	Out of Tolerance	Out of Tolerance	Out of Tolerance	Not Found	Out of Tolerance	Out of Tolerance	Not Found	Unknown	Match	Out of Tolerance
Fructose-1-phosphate (1MEOX) (6TMS) MP_M000509_A230003-101-x1[NA]_NA_2282,83_TRUE_VAR5_ALK	Match	Not Found	Not Found	Not Found	Not Found	Not Found	Not Found	Not Found	Not Found	Not Found	Not Found	Not Found	Out of Tolerance	Not Found	Unknown	Out of Tolerance	Not Found
Benzyl alcohol, TMS derivative	Not Found	Out of Tolerance	Not Found	Out of Tolerance	Not Found	Not Found	Out of Tolerance	Out of Tolerance	Out of Tolerance	Match	Not Found	Match	Match	Out of Tolerance	Unknown	Out of Tolerance	Out of Tolerance
Benzene, 1,1'-(1,1,2,2,3,3-hexafluoro-1,3-propanediyl)bis[2,3,4,5,6-pentafluoro-	Not Found	Not Found	Not Found	Out of Tolerance	Not Found	Not Found	Not Found	Not Found	Not Found	Not Found	Not Found	Out of Tolerance	Not Found	Not Found	Unknown	Not Found	Not Found
Methane, trimethoxy-	Match	Not Found	Not Found	Not Found	Not Found	Not Found	Not Found	Not Found	Not Found	Not Found	Not Found	Out of Tolerance	Not Found	Not Found	Unknown	Not Found	Not Found
1,3,5-Trisiloxane, 1,1,3,3,5,5-hexamethyl-1,5-di(tert.butyl)-	Not Found	Out of Tolerance	Out of Tolerance	Not Found	Not Found	Out of Tolerance	Out of Tolerance	Out of Tolerance	Out of Tolerance	Out of Tolerance	Out of Tolerance	Not Found	Out of Tolerance	Not Found	Unknown	Out of Tolerance	Not Found
Butane, 1-isothiocyanato-	Not Found	Not Found	Not Found	Not Found	Not Found	Not Found	Not Found	Not Found	Not Found	Not Found	Not Found	Not Found	Not Found	Not Found	Unknown	Not Found	Not Found
Bisphenol A monomethyl ether, TMS derivative	Out of Tolerance	Out of Tolerance	Out of Tolerance	Out of Tolerance	Out of Tolerance	Out of Tolerance	Out of Tolerance	Out of Tolerance	Out of Tolerance	Out of Tolerance	Out of Tolerance	Out of Tolerance	Out of Tolerance	Out of Tolerance	Unknown	Match	Out of Tolerance
NA_M000000_A140006-101-xxx_NA_1366,21_PRED_1382,75_MOSYS_PRED_VAR5_ALK	Out of Tolerance	Out of Tolerance	Out of Tolerance	Out of Tolerance	Not Found	Out of Tolerance	Out of Tolerance	Out of Tolerance	Out of Tolerance	Out of Tolerance	Out of Tolerance	Out of Tolerance	Match	Out of Tolerance	Unknown	Match	Out of Tolerance
DL-Alanine, N-methyl-N-hexyloxycarbonyl-, decyl ester	Not Found	Not Found	Out of Tolerance	Not Found	Not Found	Not Found	Not Found	Not Found	Not Found	Not Found	Not Found	Not Found	Not Found	Not Found	Unknown	Not Found	Not Found
Indole-3-lactic acid, 3TMS derivative	Out of Tolerance	Out of Tolerance	Out of Tolerance	Out of Tolerance	Match	Out of Tolerance	Out of Tolerance	Out of Tolerance	Out of Tolerance	Out of Tolerance	Out of Tolerance	Out of Tolerance	Match	Match	Unknown	Match	Not Found
Pentanoic acid, 2-(methoxyimino)-3-methyl-, trimethylsilyl ester	Out of Tolerance	Not Found	Not Found	Not Found	Out of Tolerance	Not Found	Out of Tolerance	Out of Tolerance	Out of Tolerance	Match	Not Found	Out of Tolerance	Match	Match	Unknown	Match	Not Found
Dihydroxyacetone phosphate (1MEOX) (3TMS) BP_M000327_A177006-101-x1[NA]_NA_1746,58_TRUE_VAR5_ALK	Not Found	Not Found	Not Found	Not Found	Not Found	Not Found	Not Found	Out of Tolerance	Not Found	Out of Tolerance	Not Found	Out of Tolerance	Not Found	Match	Unknown	Match	Not Found
Sarcosine ethyl ester hydrochloride	Not Found	Not Found	Not Found	Not Found	Not Found	Not Found	Not Found	Not Found	Not Found	Out of Tolerance	Not Found	Not Found	Not Found	Out of Tolerance	Unknown	Not Found	Out of Tolerance
1-(2-(3-Cyclohexenyl)ethyl)silatrane	Not Found	Not Found	Not Found	Not Found	Not Found	Not Found	Not Found	Not Found	Not Found	Not Found	Not Found	Not Found	Not Found	Not Found	Unknown	Not Found	Not Found
l-Leucine, N-methyl-N-(2-methoxyethoxycarbonyl)-, dodecyl ester	Not Found	Out of Tolerance	Out of Tolerance	Out of Tolerance	Out of Tolerance	Out of Tolerance	Out of Tolerance	Out of Tolerance	Out of Tolerance	Out of Tolerance	Out of Tolerance	Out of Tolerance	Out of Tolerance	Match	Unknown	Out of Tolerance	Not Found
1-(2-(3-Cyclohexenyl)ethyl)silatrane	Not Found	Not Found	Not Found	Not Found	Not Found	Not Found	Not Found	Not Found	Not Found	Not Found	Not Found	Not Found	Not Found	Not Found	Unknown	Not Found	Not Found
Sulfuric acid, 2TMS derivative	Not Found	Not Found	Not Found	Not Found	Not Found	Not Found	Not Found	Not Found	Not Found	Not Found	Not Found	Not Found	Not Found	Not Found	Unknown	Not Found	Not Found
(Z)-5-Methoxy-3,5-dimethyl-2-hexenyltrimethylsilane	Not Found	Out of Tolerance	Match	Not Found	Match	Out of Tolerance	Not Found	Not Found	Not Found	Not Found	Not Found	Not Found	Match	Match	Unknown	Out of Tolerance	Not Found
Methylal	Not Found	Out of Tolerance	Not Found	Not Found	Not Found	Not Found	Not Found	Not Found	Not Found	Out of Tolerance	Not Found	Not Found	Match	Not Found	Unknown	Out of Tolerance	Not Found
Decane, 3-ethyl-3-methyl-	Not Found	Not Found	Out of Tolerance	Not Found	Not Found	Not Found	Not Found	Not Found	Not Found	Not Found	Not Found	Not Found	Not Found	Not Found	Unknown	Not Found	Not Found
NA_M000000_A287007-101-xxx_NA_2866,73_PRED_2958,03_MOSYS_PRED_VAR5_ALK	Not Found	Not Found	Not Found	Not Found	Not Found	Not Found	Not Found	Not Found	Not Found	Not Found	Not Found	Not Found	Not Found	Not Found	Unknown	Not Found	Not Found
Cyclopropane, 1-methyl-2-(3-methylpentyl)-	Not Found	Not Found	Not Found	Not Found	Out of Tolerance	Out of Tolerance	Not Found	Not Found	Not Found	Not Found	Not Found	Not Found	Out of Tolerance	Not Found	Unknown	Out of Tolerance	Not Found
NA_M000000_A277004-101-xxx_NA_2754,72_PRED_2840,44_MOSYS_PRED_VAR5_ALK	Not Found	Not Found	Not Found	Not Found	Not Found	Not Found	Not Found	Not Found	Not Found	Out of Tolerance	Out of Tolerance	Out of Tolerance	Not Found	Not Found	Unknown	Out of Tolerance	Not Found
Indole-3-pyruvic acid (1MEOX) (2TMS) MP_M001050_A219009-101-x1[NA]_NA_2197,08_TRUE_VAR5_ALK	Not Found	Out of Tolerance	Match	Out of Tolerance	Out of Tolerance	Match	Match	Out of Tolerance	Out of Tolerance	Match	Out of Tolerance	Out of Tolerance	Out of Tolerance	Out of Tolerance	Unknown	Match	Not Found
2-Ethylhexanal ethylene glycol acetal	Out of Tolerance	Out of Tolerance	Out of Tolerance	Out of Tolerance	Out of Tolerance	Match	Out of Tolerance	Out of Tolerance	Out of Tolerance	Out of Tolerance	Out of Tolerance	Out of Tolerance	Match	Match	Unknown	Match	Out of Tolerance
Undecane, 4-methyl-	Out of Tolerance	Not Found	Out of Tolerance	Not Found	Not Found	Match	Out of Tolerance	Out of Tolerance	Not Found	Not Found	Out of Tolerance	Not Found	Not Found	Match	Unknown	Not Found	Out of Tolerance
2-Piperidinecarboxylic acid (2TMS)_M000528_A137004-101-xxx_NA_1365,15_TRUE_1381,64_MOSYS_PRED_VAR5_ALK	Out of Tolerance	Out of Tolerance	Out of Tolerance	Out of Tolerance	Out of Tolerance	Out of Tolerance	Out of Tolerance	Out of Tolerance	Out of Tolerance	Match	Out of Tolerance	Out of Tolerance	Match	Not Found	Unknown	Match	Out of Tolerance
4-tert-Octylphenol, TMS derivative	Not Found	Out of Tolerance	Not Found	Match	Out of Tolerance	Not Found	Out of Tolerance	Out of Tolerance	Out of Tolerance	Out of Tolerance	Out of Tolerance	Not Found	Not Found	Out of Tolerance	Unknown	Not Found	Out of Tolerance
Unknown#bth-pae-035_M000000_A153019-101-xxx_NA_1521,51_PRED_1545,79_MOSYS_PRED_VAR5_ALK	Not Found	Not Found	Not Found	Not Found	Not Found	Not Found	Not Found	Not Found	Match	Out of Tolerance	Not Found	Out of Tolerance	Out of Tolerance	Out of Tolerance	Unknown	Match	Not Found
Glucopyranose [-H20] (4TMS)_M000040_A177004-101-xxx_NA_1755,94_TRUE_1791,90_MOSYS_PRED_VAR5_ALK	Not Found	Out of Tolerance	Out of Tolerance	Not Found	Out of Tolerance	Out of Tolerance	Out of Tolerance	Not Found	Out of Tolerance	Not Found	Not Found	Not Found	Match	Match	Unknown	Match	Not Found
Benzenemethanol, 2-chloro-α-[[(1-methylethyl)amino]methyl]-	Not Found	Out of Tolerance	Not Found	Out of Tolerance	Out of Tolerance	Not Found	Out of Tolerance	Not Found	Out of Tolerance	Out of Tolerance	Out of Tolerance	Out of Tolerance	Out of Tolerance	Out of Tolerance	Unknown	Out of Tolerance	Out of Tolerance
Phosphoric acid, 3-(methoxyimino)-2-[(trimethylsilyl)oxy]propyl bis(trimethylsilyl) ester, (±)-	Out of Tolerance	Out of Tolerance	Out of Tolerance	Out of Tolerance	Not Found	Not Found	Out of Tolerance	Out of Tolerance	Out of Tolerance	Out of Tolerance	Out of Tolerance	Not Found	Match	Not Found	Unknown	Match	Not Found
4-Pyridinol, TMS derivative	Not Found	Out of Tolerance	Not Found	Not Found	Out of Tolerance	Not Found	Out of Tolerance	Out of Tolerance	Not Found	Out of Tolerance	Out of Tolerance	Not Found	Not Found	Match	Unknown	Match	Not Found
NA170001 (classified unknown)_M000000_A170001-101-xxx_NA_1688,9_PRED_1721,52_MOSYS_PRED_VAR5_ALK	Not Found	Not Found	Not Found	Not Found	Not Found	Not Found	Not Found	Not Found	Not Found	Not Found	Not Found	Not Found	Not Found	Not Found	Unknown	Not Found	Not Found
2,2,4,4,5,5,7,7-Octamethyloctane	Not Found	Not Found	Not Found	Not Found	Not Found	Not Found	Not Found	Not Found	Not Found	Not Found	Not Found	Not Found	Not Found	Not Found	Unknown	Not Found	Not Found
Glucose-6-phosphate, 2-amino-2-deoxy- (1MEOX) (6TMS) BP_M000771_A236010-101-x1[NA]_NA_2358,48_TRUE_VAR5_ALK	Not Found	Not Found	Not Found	Not Found	Out of Tolerance	Out of Tolerance	Out of Tolerance	Not Found	Not Found	Out of Tolerance	Out of Tolerance	Out of Tolerance	Not Found	Match	Unknown	Out of Tolerance	Not Found
3-Pyridinol, TMS derivative	Not Found	Match	Not Found	Out of Tolerance	Not Found	Not Found	Match	Not Found	Match	Match	Out of Tolerance	Match	Not Found	Match	Unknown	Not Found	Out of Tolerance
NA_M000000_A116011-101-xxx_NA_1164,86_TRUE_1171,37_MOSYS_PRED_VAR5_ALK	Out of Tolerance	Out of Tolerance	Not Found	Not Found	Match	Out of Tolerance	Match	Match	Match	Out of Tolerance	Match	Not Found	Not Found	Match	Unknown	Match	Out of Tolerance
Silane, diethylbutoxypentyloxy-	Out of Tolerance	Out of Tolerance	Out of Tolerance	Not Found	Out of Tolerance	Out of Tolerance	Out of Tolerance	Not Found	Out of Tolerance	Out of Tolerance	Out of Tolerance	Out of Tolerance	Out of Tolerance	Match	Unknown	Not Found	Not Found
Benzothiazole, 2-(2-hydroxyethylthio)-	Match	Match	Match	Match	Match	Out of Tolerance	Out of Tolerance	Out of Tolerance	Match	Match	Match	Match	Match	Match	Unknown	Match	Out of Tolerance
DL-Alanine, N-methyl-N-(byt-3-en-1-yloxycarbonyl)-, byt-3-en-1-yl ester	Out of Tolerance	Out of Tolerance	Not Found	Match	Out of Tolerance	Not Found	Out of Tolerance	Not Found	Out of Tolerance	Match	Match	Out of Tolerance	Out of Tolerance	Match	Unknown	Match	Not Found
Pentanoic acid, 3-methyl-2-[(trimethylsilyl)oxy]-, trimethylsilyl ester	Out of Tolerance	Match	Not Found	Out of Tolerance	Not Found	Not Found	Out of Tolerance	Out of Tolerance	Match	Match	Out of Tolerance	Not Found	Out of Tolerance	Match	Unknown	Out of Tolerance	Match
Alanine, N-methyl-n-propargyloxycarbonyl-, heptyl ester	Not Found	Not Found	Not Found	Not Found	Not Found	Not Found	Not Found	Not Found	Out of Tolerance	Not Found	Not Found	Not Found	Out of Tolerance	Out of Tolerance	Unknown	Out of Tolerance	Not Found
NA_M000000_A145008-101-xxx_NA_1447,39_PRED_1467,98_MOSYS_PRED_VAR5_ALK	Out of Tolerance	Out of Tolerance	Match	Out of Tolerance	Out of Tolerance	Match	Match	Out of Tolerance	Match	Not Found	Out of Tolerance	Out of Tolerance	Out of Tolerance	Match	Unknown	Match	Out of Tolerance
Siloxane_M000870_A271010-101-xxx_NA_2716,61_PRED_2800,43_MOSYS_PRED_VAR5_ALK	Match	Match	Out of Tolerance	Match	Out of Tolerance	Out of Tolerance	Out of Tolerance	Out of Tolerance	Out of Tolerance	Out of Tolerance	Out of Tolerance	Out of Tolerance	Out of Tolerance	Out of Tolerance	Unknown	Match	Out of Tolerance
Thymidine-5'-monophosphoric-acid_3TMS_M000000_A282014-101-x1[NA]_NA_2816,53_PRED_VAR5_ALK	Out of Tolerance	Out of Tolerance	Out of Tolerance	Out of Tolerance	Out of Tolerance	Out of Tolerance	Out of Tolerance	Out of Tolerance	Out of Tolerance	Out of Tolerance	Out of Tolerance	Out of Tolerance	Match	Match	Unknown	Match	Not Found
Unknown#sst-cgl-114_M000000_A229006-101-xxx_NA_2290,3_PRED_2352,88_MOSYS_PRED_VAR5_ALK	Not Found	Not Found	Not Found	Not Found	Not Found	Not Found	Not Found	Not Found	Not Found	Not Found	Not Found	Not Found	Out of Tolerance	Out of Tolerance	Unknown	Not Found	Not Found
Siloxane_M000870_A225011-101-xxx_NA_2256,43_PRED_2317,32_MOSYS_PRED_VAR5_ALK	Not Found	Not Found	Not Found	Not Found	Not Found	Not Found	Not Found	Not Found	Not Found	Not Found	Not Found	Not Found	Not Found	Not Found	Unknown	Not Found	Not Found
{4-Methoxy-2-[(trimethylsilyl)oxy]phenyl}{2-[(trimethylsilyl)oxy]phenyl}methanone	Out of Tolerance	Out of Tolerance	Not Found	Out of Tolerance	Not Found	Not Found	Out of Tolerance	Out of Tolerance	Out of Tolerance	Out of Tolerance	Out of Tolerance	Out of Tolerance	Out of Tolerance	Match	Unknown	Out of Tolerance	Not Found
Trehalose, alpha,alpha'-, D- (8TMS)_M000671_A274002-101-xxx_NA_2726,3_TRUE_2809,10_MOSYS_TRUE_VAR5_ALK	Not Found	Not Found	Not Found	Not Found	Not Found	Not Found	Not Found	Match	Not Found	Out of Tolerance	Not Found	Not Found	Not Found	Out of Tolerance	Unknown	Not Found	Not Found
Norleucine, N-trimethylsilyl-, trimethylsilyl ester	Not Found	Not Found	Not Found	Not Found	Not Found	Not Found	Not Found	Not Found	Not Found	Not Found	Not Found	Not Found	Match	Match	Unknown	Out of Tolerance	Not Found
1-(2-(3-Cyclohexenyl)ethyl)silatrane	Not Found	Not Found	Not Found	Not Found	Not Found	Not Found	Not Found	Not Found	Not Found	Not Found	Not Found	Not Found	Not Found	Not Found	Unknown	Not Found	Not Found
Furfuryl alcohol, TMS derivative	Not Found	Not Found	Not Found	Not Found	Not Found	Not Found	Not Found	Not Found	Not Found	Not Found	Not Found	Not Found	Out of Tolerance	Match	Unknown	Not Found	Not Found
5-(Piperidin-1-ylmethyl)-3-pyridin-3-yl-5,6-dihydro-4H-1,2,4-oxadiazine	Match	Not Found	Not Found	Not Found	Match	Not Found	Not Found	Not Found	Not Found	Not Found	Not Found	Not Found	Not Found	Not Found	Unknown	Not Found	Not Found
3H-1,2,4-Triazol-3-one, 1,2-dihydro-	Match	Out of Tolerance	Out of Tolerance	Match	Out of Tolerance	Out of Tolerance	Out of Tolerance	Out of Tolerance	Out of Tolerance	Out of Tolerance	Out of Tolerance	Out of Tolerance	Out of Tolerance	Out of Tolerance	Unknown	Out of Tolerance	Out of Tolerance
Glutamine, DL- (3TMS)_M000032_A178001-101-xxx_NA_1766,72_TRUE_1786,50_MOSYS_TRUE_VAR5_ALK	Out of Tolerance	Not Found	Out of Tolerance	Out of Tolerance	Out of Tolerance	Out of Tolerance	Out of Tolerance	Out of Tolerance	Match	Match	Match	Out of Tolerance	Match	Match	Unknown	Match	Not Found
Unknown#sst-cgl-008_M000000_A124007-101-x1[NA]_NA_1238,44_PRED_VAR5_ALK	Out of Tolerance	Out of Tolerance	Out of Tolerance	Out of Tolerance	Out of Tolerance	Not Found	Out of Tolerance	Match	Match	Out of Tolerance	Out of Tolerance	Out of Tolerance	Match	Not Found	Unknown	Match	Not Found
Dodecane, 4,6-dimethyl-	Match	Match	Out of Tolerance	Match	Match	Match	Match	Out of Tolerance	Out of Tolerance	Out of Tolerance	Out of Tolerance	Out of Tolerance	Out of Tolerance	Match	Unknown	Out of Tolerance	Match
Acetic acid, TMS derivative	Not Found	Out of Tolerance	Not Found	Not Found	Not Found	Not Found	Not Found	Not Found	Not Found	Match	Not Found	Match	Not Found	Not Found	Unknown	Not Found	Not Found
Glucose-6-phosphate (1MEOX) (6TMS) MP_M000513_A233002-101-xxx_NA_2307,34_TRUE_2370,77_MOSYS_PRED_VAR5_ALK	Out of Tolerance	Out of Tolerance	Out of Tolerance	Out of Tolerance	Out of Tolerance	Out of Tolerance	Out of Tolerance	Out of Tolerance	Out of Tolerance	Out of Tolerance	Out of Tolerance	Out of Tolerance	Out of Tolerance	Out of Tolerance	Unknown	Match	Not Found
5-Methyluridine, 3TMS derivative	Not Found	Not Found	Not Found	Not Found	Not Found	Not Found	Not Found	Not Found	Not Found	Not Found	Not Found	Not Found	Not Found	Not Found	Unknown	Not Found	Not Found
NA_M000000_A118006-101-xxx_NA_1189,63_TRUE_1197,38_MOSYS_PRED_VAR5_ALK	Out of Tolerance	Out of Tolerance	Not Found	Not Found	Out of Tolerance	Not Found	Not Found	Not Found	Not Found	Out of Tolerance	Out of Tolerance	Out of Tolerance	Out of Tolerance	Out of Tolerance	Unknown	Match	Out of Tolerance
Silanamine, N-[2-[2-methoxy-4-[(trimethylsilyl)oxy]phenyl]ethyl]-1,1,1-trimethyl-N-(trimethylsilyl)-	Not Found	Not Found	Not Found	Not Found	Not Found	Not Found	Not Found	Not Found	Not Found	Not Found	Not Found	Not Found	Out of Tolerance	Match	Unknown	Match	Not Found
Maltitol, nonakis(trimethylsilyl) ether	Not Found	Not Found	Not Found	Not Found	Not Found	Not Found	Not Found	Not Found	Not Found	Not Found	Not Found	Not Found	Not Found	Not Found	Unknown	Not Found	Not Found
Cycloheptasiloxane, tetradecamethyl-	Out of Tolerance	Out of Tolerance	Out of Tolerance	Out of Tolerance	Out of Tolerance	Not Found	Match	Out of Tolerance	Out of Tolerance	Out of Tolerance	Out of Tolerance	Out of Tolerance	Match	Out of Tolerance	Unknown	Match	Not Found
l-Norvaline, n-propoxycarbonyl-, undecyl ester	Not Found	Not Found	Not Found	Not Found	Not Found	Not Found	Not Found	Not Found	Not Found	Not Found	Not Found	Out of Tolerance	Match	Match	Unknown	Out of Tolerance	Not Found
N,N'-Diacetylchitobiose (1MEOX) (6TMS) MP_M001136_A301006-101-xxx_NA_3018,88_TRUE_3117,76_MOSYS_PRED_VAR5_ALK	Not Found	Not Found	Not Found	Not Found	Not Found	Out of Tolerance	Not Found	Not Found	Out of Tolerance	Out of Tolerance	Out of Tolerance	Out of Tolerance	Match	Match	Unknown	Match	Not Found
2-Propenoic acid, 2-[(trimethylsilyl)oxy]-, trimethylsilyl ester	Out of Tolerance	Out of Tolerance	Not Found	Out of Tolerance	Not Found	Not Found	Out of Tolerance	Not Found	Not Found	Out of Tolerance	Out of Tolerance	Out of Tolerance	Not Found	Match	Unknown	Not Found	Out of Tolerance
Pyridine, 3-methyl-2,6-diphenyl-	Out of Tolerance	Not Found	Out of Tolerance	Out of Tolerance	Match	Not Found	Match	Not Found	Not Found	Out of Tolerance	Match	Match	Not Found	Out of Tolerance	Unknown	Not Found	Not Found
Dodecane, 2,6,10-trimethyl-	Not Found	Not Found	Not Found	Not Found	Not Found	Not Found	Not Found	Not Found	Not Found	Not Found	Not Found	Not Found	Not Found	Not Found	Unknown	Not Found	Not Found
Ribulose-5-phosphate (1MEOX) (5TMS) MP_M000769_A212012-101-x1[NA]_NA_2102,51_TRUE_VAR5_ALK	Not Found	Out of Tolerance	Not Found	Not Found	Not Found	Not Found	Not Found	Not Found	Not Found	Not Found	Out of Tolerance	Not Found	Not Found	Out of Tolerance	Unknown	Out of Tolerance	Not Found
Pyridine, 1-oxide	Not Found	Not Found	Not Found	Not Found	Not Found	Not Found	Out of Tolerance	Not Found	Match	Out of Tolerance	Out of Tolerance	Out of Tolerance	Not Found	Match	Unknown	Out of Tolerance	Not Found
Glucose-6-phosphate, 2-amino-2-deoxy- (1MEOX) (6TMS) MP_M000771_A236009-101-x1[NA]_NA_2346,1_TRUE_VAR5_ALK	Not Found	Not Found	Not Found	Out of Tolerance	Not Found	Not Found	Out of Tolerance	Out of Tolerance	Not Found	Out of Tolerance	Not Found	Out of Tolerance	Match	Match	Unknown	Out of Tolerance	Not Found
d-Proline, N-ethoxycarbonyl-, heptyl ester	Not Found	Not Found	Not Found	Not Found	Not Found	Not Found	Not Found	Not Found	Not Found	Not Found	Not Found	Not Found	Match	Match	Unknown	Match	Not Found
2-Butene-1,4-diol, (E)-, 2TMS derivative	Not Found	Not Found	Not Found	Not Found	Not Found	Not Found	Not Found	Not Found	Not Found	Not Found	Not Found	Not Found	Not Found	Not Found	Unknown	Not Found	Not Found
Unknown#sst-cgl-122_M000000_A266012-101-xxx_NA_2659,18_PRED_2740,14_MOSYS_PRED_VAR5_ALK	Not Found	Not Found	Not Found	Not Found	Not Found	Not Found	Not Found	Not Found	Not Found	Not Found	Not Found	Not Found	Not Found	Not Found	Unknown	Not Found	Not Found
D-Ribofuranose, 2,3,5-tris-O-(trimethylsilyl)-, bis(trimethylsilyl) phosphate	Not Found	Not Found	Not Found	Not Found	Not Found	Not Found	Not Found	Not Found	Not Found	Not Found	Not Found	Not Found	Not Found	Match	Unknown	Not Found	Not Found
Octane, 2,7-dimethyl-	Not Found	Not Found	Not Found	Not Found	Not Found	Not Found	Not Found	Not Found	Not Found	Not Found	Not Found	Not Found	Not Found	Not Found	Unknown	Not Found	Not Found
Octane, 2,4,6-trimethyl-	Match	Out of Tolerance	Not Found	Out of Tolerance	Match	Not Found	Match	Not Found	Out of Tolerance	Out of Tolerance	Out of Tolerance	Not Found	Not Found	Out of Tolerance	Unknown	Not Found	Out of Tolerance
Unknown#sst-cgl-078_M000000_A184036-101-xxx_NA_1840,13_PRED_1880,28_MOSYS_PRED_VAR5_ALK	Out of Tolerance	Out of Tolerance	Out of Tolerance	Out of Tolerance	Out of Tolerance	Out of Tolerance	Out of Tolerance	Out of Tolerance	Out of Tolerance	Out of Tolerance	Out of Tolerance	Out of Tolerance	Out of Tolerance	Match	Unknown	Match	Not Found
Pantothenic acid tritms	Not Found	Not Found	Not Found	Not Found	Not Found	Not Found	Not Found	Not Found	Not Found	Not Found	Not Found	Not Found	Not Found	Not Found	Unknown	Not Found	Not Found
1-(2-(3-Cyclohexenyl)ethyl)silatrane	Not Found	Not Found	Not Found	Not Found	Not Found	Not Found	Not Found	Not Found	Not Found	Not Found	Not Found	Not Found	Not Found	Not Found	Unknown	Not Found	Not Found
Tridecane, 2-methyl-	Out of Tolerance	Match	Match	Match	Match	Out of Tolerance	Match	Out of Tolerance	Match	Match	Match	Match	Match	Match	Unknown	Match	Match
Monomethyl succinate, trimethylsilyl ester	Out of Tolerance	Out of Tolerance	Not Found	Out of Tolerance	Match	Not Found	Out of Tolerance	Out of Tolerance	Not Found	Match	Out of Tolerance	Out of Tolerance	Out of Tolerance	Not Found	Unknown	Out of Tolerance	Not Found
Phenol, 2,4-bis(1,1-dimethylethyl)-, phosphite (3:1)	Not Found	Not Found	Not Found	Not Found	Not Found	Out of Tolerance	Out of Tolerance	Not Found	Not Found	Not Found	Not Found	Not Found	Out of Tolerance	Not Found	Unknown	Match	Out of Tolerance
Hydrobenzoin, 2TMS derivative	Not Found	Not Found	Not Found	Not Found	Not Found	Not Found	Not Found	Not Found	Not Found	Not Found	Not Found	Not Found	Not Found	Not Found	Unknown	Not Found	Not Found
2-Piperidinecarboxylic acid (2TMS)_M000528_A137004-101-x1[NA]_NA_1365,15_TRUE_VAR5_ALK	Out of Tolerance	Out of Tolerance	Out of Tolerance	Out of Tolerance	Out of Tolerance	Out of Tolerance	Out of Tolerance	Out of Tolerance	Match	Out of Tolerance	Match	Match	Match	Match	Unknown	Match	Out of Tolerance
Bernzothiazole, 2-[2-(2-fluorophenoxy)ethylthio]-	Match	Out of Tolerance	Out of Tolerance	Out of Tolerance	Match	Out of Tolerance	Out of Tolerance	Not Found	Match	Match	Match	Out of Tolerance	Match	Match	Unknown	Match	Not Found
D-Mannose, 2,3,4,5-tetrakis-O-(trimethylsilyl)-, O-methyloxime, 6-[bis(trimethylsilyl) phosphate]	Out of Tolerance	Out of Tolerance	Out of Tolerance	Out of Tolerance	Out of Tolerance	Out of Tolerance	Out of Tolerance	Out of Tolerance	Out of Tolerance	Out of Tolerance	Out of Tolerance	Out of Tolerance	Match	Match	Unknown	Out of Tolerance	Not Found
Unknown#sst-cgl-040_M000000_A163017-101-xxx_NA_1628,54_PRED_1658,15_MOSYS_PRED_VAR5_ALK	Out of Tolerance	Out of Tolerance	Not Found	Out of Tolerance	Out of Tolerance	Out of Tolerance	Out of Tolerance	Out of Tolerance	Out of Tolerance	Out of Tolerance	Out of Tolerance	Out of Tolerance	Not Found	Match	Unknown	Match	Not Found
Siloxane_M000870_A219007-101-xxx_NA_2188,76_PRED_2246,28_MOSYS_PRED_VAR5_ALK	Out of Tolerance	Out of Tolerance	Out of Tolerance	Match	Match	Match	Out of Tolerance	Match	Out of Tolerance	Out of Tolerance	Out of Tolerance	Match	Out of Tolerance	Out of Tolerance	Unknown	Match	Out of Tolerance
2,5-Di(trifluoromethyl)benzoic acid, 4-nitrophenyl ester	Not Found	Not Found	Not Found	Not Found	Out of Tolerance	Not Found	Not Found	Not Found	Not Found	Not Found	Not Found	Not Found	Not Found	Not Found	Unknown	Not Found	Not Found
Unknown#bth-pae-059_M000000_A107001-101-x1[NA]_NA_1060,6_PRED_VAR5_ALK	Not Found	Not Found	Not Found	Not Found	Not Found	Not Found	Not Found	Not Found	Not Found	Out of Tolerance	Not Found	Out of Tolerance	Out of Tolerance	Match	Unknown	Out of Tolerance	Not Found
Hexasiloxane, tetradecamethyl-	Match	Not Found	Match	Match	Match	Match	Match	Out of Tolerance	Not Found	Match	Not Found	Match	Match	Match	Unknown	Match	#N/A
Phthalic acid, hept-4-yl isobutyl ester	Match	Match	Out of Tolerance	Match	Match	Match	Not Found	Out of Tolerance	Match	Not Found	Match	Not Found	Not Found	Match	Unknown	Match	Out of Tolerance
D-(-)-Ribofuranose, tetrakis(trimethylsilyl) ether (isomer 1)	Not Found	Not Found	Not Found	Not Found	Out of Tolerance	Out of Tolerance	Not Found	Out of Tolerance	Not Found	Not Found	Not Found	Out of Tolerance	Match	Match	Unknown	Match	Not Found
Trehalose, alpha,alpha'-, D- (8TMS)_M000671_A274002-101-xxx_NA_2726,3_TRUE_2809,10_MOSYS_TRUE_VAR5_ALK	Not Found	Not Found	Not Found	Not Found	Not Found	Not Found	Not Found	Match	Not Found	Out of Tolerance	Not Found	Not Found	Not Found	Out of Tolerance	Unknown	Not Found	Not Found
Adipic acid (2TMS)_M000471_A151006-101-x1[NA]_NA_1500,92_TRUE_VAR5_ALK	Out of Tolerance	Out of Tolerance	Out of Tolerance	Out of Tolerance	Out of Tolerance	Out of Tolerance	Out of Tolerance	Out of Tolerance	Out of Tolerance	Out of Tolerance	Out of Tolerance	Out of Tolerance	Match	Match	Unknown	Out of Tolerance	Out of Tolerance
4-Chloro-1-azabicyclo[2.2.2]octane	Not Found	Not Found	Not Found	Not Found	Not Found	Not Found	Not Found	Not Found	Not Found	Out of Tolerance	Not Found	Not Found	Not Found	Not Found	Unknown	Not Found	Not Found
Ornithine, N2-acetyl- (3TMS)_M000409_A200002-101-xxx_NA_1997,44_TRUE_2045,43_MOSYS_PRED_VAR5_ALK	Out of Tolerance	Out of Tolerance	Out of Tolerance	Out of Tolerance	Out of Tolerance	Out of Tolerance	Out of Tolerance	Out of Tolerance	Out of Tolerance	Out of Tolerance	Out of Tolerance	Out of Tolerance	Out of Tolerance	Match	Unknown	Match	Not Found
3-Indolylacetamide, TMS derivative	Not Found	Not Found	Not Found	Not Found	Not Found	Not Found	Not Found	Not Found	Not Found	Not Found	Not Found	Not Found	Match	Not Found	Unknown	Not Found	Not Found
Tridecane, n-_M000533_A130004-101-x1[n-]_NA_1293,26_PRED_VAR5_ALK	Not Found	Not Found	Not Found	Not Found	Not Found	Not Found	Out of Tolerance	Not Found	Not Found	Match	Not Found	Not Found	Not Found	Not Found	Unknown	Not Found	Not Found
N-Ethyl-2-carbethoxyazetidine	Not Found	Not Found	Not Found	Not Found	Not Found	Not Found	Not Found	Not Found	Not Found	Not Found	Not Found	Not Found	Out of Tolerance	Not Found	Unknown	Not Found	Not Found
1-Methoxy-2-propanol, TMS derivative	Not Found	Not Found	Not Found	Out of Tolerance	Not Found	Not Found	Not Found	Not Found	Not Found	Out of Tolerance	Not Found	Not Found	Not Found	Out of Tolerance	Unknown	Not Found	Not Found
l-Norvaline, N-ethoxycarbonyl-, pentadecyl ester	Not Found	Not Found	Not Found	Not Found	Not Found	Not Found	Not Found	Not Found	Not Found	Not Found	Not Found	Not Found	Match	Match	Unknown	Out of Tolerance	Not Found
L-Asparagine, Nγ-[2-(acetylamino)-4-O-[2-(acetylamino)-2-deoxy-3,4,6-tris-O-(trimethylsilyl)-β-D-glucopyranosyl]-2-deoxy-3,6-bis-O-(trimethylsilyl)-β-D-glucopyranosyl]-	Not Found	Not Found	Not Found	Not Found	Not Found	Not Found	Not Found	Not Found	Not Found	Not Found	Not Found	Not Found	Match	Out of Tolerance	Unknown	Out of Tolerance	Not Found
1,3-Dipentyl-heptabarbital	Not Found	Out of Tolerance	Match	Match	Match	Match	Match	Match	Match	Match	Out of Tolerance	Out of Tolerance	Match	Match	Unknown	Match	Match
4-Pyrimidinamine, N-(trimethylsilyl)-2-[(trimethylsilyl)oxy]-	Out of Tolerance	Out of Tolerance	Out of Tolerance	Out of Tolerance	Out of Tolerance	Out of Tolerance	Out of Tolerance	Out of Tolerance	Out of Tolerance	Out of Tolerance	Out of Tolerance	Out of Tolerance	Out of Tolerance	Out of Tolerance	Unknown	Out of Tolerance	Match
Silanol, trimethyl-, carbonate (2:1)	Not Found	Out of Tolerance	Out of Tolerance	Not Found	Not Found	Out of Tolerance	Not Found	Not Found	Out of Tolerance	Out of Tolerance	Out of Tolerance	Not Found	Out of Tolerance	Out of Tolerance	Unknown	Not Found	Not Found
1,3,5-Trisiloxane, 1,1,3,3,5,5-hexamethyl-1,5-di(tert.butyl)-	Not Found	Out of Tolerance	Out of Tolerance	Not Found	Not Found	Out of Tolerance	Out of Tolerance	Out of Tolerance	Out of Tolerance	Out of Tolerance	Out of Tolerance	Not Found	Out of Tolerance	Not Found	Unknown	Out of Tolerance	Not Found
Unknown#bth-pae-014_M000000_A117009-101-xxx_NA_1167,66_PRED_1174,31_MOSYS_PRED_VAR5_ALK	Not Found	Not Found	Not Found	Not Found	Not Found	Not Found	Not Found	Not Found	Not Found	Not Found	Out of Tolerance	Not Found	Not Found	Out of Tolerance	Unknown	Not Found	Not Found
Pipecolic acid, 2TMS derivative	Not Found	Not Found	Not Found	Not Found	Not Found	Not Found	Out of Tolerance	Out of Tolerance	Not Found	Out of Tolerance	Not Found	Out of Tolerance	Match	Match	Unknown	Match	Not Found
α-D-Lactose, 8TMS derivative	Not Found	Not Found	Not Found	Not Found	Not Found	Not Found	Not Found	Not Found	Not Found	Not Found	Not Found	Not Found	Not Found	Not Found	Unknown	Not Found	Not Found
Sulfurous acid, decyl 2-ethylhexyl ester	Not Found	Not Found	Not Found	Not Found	Not Found	Not Found	Not Found	Not Found	Not Found	Not Found	Not Found	Not Found	Not Found	Not Found	Unknown	Not Found	Not Found
1-(2-(3-Cyclohexenyl)ethyl)silatrane	Not Found	Not Found	Not Found	Not Found	Not Found	Not Found	Not Found	Not Found	Not Found	Not Found	Not Found	Not Found	Not Found	Not Found	Unknown	Not Found	Not Found
1-(p-Methoxyphenyl)-2-phenylbenzimidazole	Out of Tolerance	Out of Tolerance	Out of Tolerance	Match	Out of Tolerance	Out of Tolerance	Out of Tolerance	Out of Tolerance	Out of Tolerance	Out of Tolerance	Out of Tolerance	Out of Tolerance	Not Found	Out of Tolerance	Unknown	Match	Match
Methylal	Not Found	Out of Tolerance	Not Found	Not Found	Not Found	Not Found	Not Found	Not Found	Not Found	Out of Tolerance	Not Found	Not Found	Match	Not Found	Unknown	Out of Tolerance	Not Found
Cyclodecasiloxane, eicosamethyl-	Out of Tolerance	Out of Tolerance	Out of Tolerance	Out of Tolerance	Out of Tolerance	Out of Tolerance	Out of Tolerance	Out of Tolerance	Not Found	Out of Tolerance	Out of Tolerance	Out of Tolerance	Match	Out of Tolerance	Unknown	Not Found	Not Found
1-Isopropoxy-2-trihexylsilyloxybenzene	Not Found	Out of Tolerance	Out of Tolerance	Out of Tolerance	Match	Match	Out of Tolerance	Out of Tolerance	Out of Tolerance	Match	Out of Tolerance	Out of Tolerance	Out of Tolerance	Match	Unknown	Match	Out of Tolerance
3-Butene-1,2-diol, 1-(2-furanyl)-	Not Found	Not Found	Not Found	Not Found	Not Found	Not Found	Not Found	Not Found	Not Found	Not Found	Not Found	Not Found	Not Found	Not Found	Unknown	Not Found	Not Found
D-Erythro-Pentose, 2-deoxy-3,4-bis-O-(trimethylsilyl)-, 5-[bis(trimethylsilyl) methoxyphosphorimidate]	Not Found	Not Found	Not Found	Not Found	Not Found	Not Found	Not Found	Not Found	Not Found	Not Found	Not Found	Out of Tolerance	Out of Tolerance	Out of Tolerance	Unknown	Not Found	Not Found
5-Hydroxytryptophan, 4TMS derivative	Not Found	Not Found	Not Found	Not Found	Not Found	Not Found	Not Found	Not Found	Not Found	Not Found	Not Found	Out of Tolerance	Match	Match	Unknown	Match	Not Found
1-Aminocyclopentanecarboxylic acid, 3-chloropropoxycarbonyl-, tridecyl ester	Not Found	Not Found	Not Found	Not Found	Not Found	Not Found	Out of Tolerance	Not Found	Not Found	Not Found	Not Found	Not Found	Match	Match	Unknown	Match	Not Found
1-(2-(3-Cyclohexenyl)ethyl)silatrane	Not Found	Not Found	Not Found	Not Found	Not Found	Not Found	Not Found	Not Found	Not Found	Not Found	Not Found	Not Found	Not Found	Not Found	Unknown	Not Found	Not Found
4,4'-Biphenyldiol, 2TMS derivative	Not Found	Not Found	Not Found	Not Found	Out of Tolerance	Out of Tolerance	Not Found	Not Found	Out of Tolerance	Out of Tolerance	Not Found	Not Found	Out of Tolerance	Out of Tolerance	Unknown	Match	Not Found
Thymidine, 3'-O-(trimethylsilyl)-, 5'-[bis(trimethylsilyl) phosphate]	Not Found	Not Found	Not Found	Not Found	Not Found	Not Found	Not Found	Not Found	Not Found	Not Found	Not Found	Not Found	Not Found	Not Found	Unknown	Not Found	Not Found
1-Octylsilatrane	Not Found	Not Found	Not Found	Not Found	Not Found	Not Found	Not Found	Not Found	Not Found	Not Found	Not Found	Not Found	Not Found	Not Found	Unknown	Not Found	Not Found
NA_M000000_A235007-101-x1[NA]_NA_2322,67_PRED_VAR5_ALK	Not Found	Not Found	Not Found	Not Found	Not Found	Not Found	Not Found	Not Found	Not Found	Not Found	Not Found	Not Found	Not Found	Not Found	Unknown	Not Found	Not Found
1-Morpholinopropan-2-ol trifluoroacetate	Not Found	Not Found	Not Found	Not Found	Out of Tolerance	Out of Tolerance	Out of Tolerance	Not Found	Not Found	Not Found	Out of Tolerance	Not Found	Out of Tolerance	Out of Tolerance	Unknown	Out of Tolerance	Not Found
Undecane	Out of Tolerance	Not Found	Match	Out of Tolerance	Not Found	Not Found	Out of Tolerance	Not Found	Not Found	Not Found	Match	Out of Tolerance	Not Found	Out of Tolerance	Unknown	Not Found	Out of Tolerance
beta-Alanyl-lysine (6TMS)_M001083_A255007-101-x1[L-]_NA_2553,19_TRUE_VAR5_ALK	Not Found	Not Found	Not Found	Not Found	Not Found	Out of Tolerance	Out of Tolerance	Out of Tolerance	Out of Tolerance	Out of Tolerance	Out of Tolerance	Out of Tolerance	Out of Tolerance	Out of Tolerance	Unknown	Out of Tolerance	Not Found
Methyl (2R,3R,4S)-3-(tert-butyldimethylsilyloxy)-2,4-dimethylhexanoate	Not Found	Not Found	Not Found	Not Found	Not Found	Not Found	Not Found	Not Found	Not Found	Not Found	Not Found	Not Found	Not Found	Match	Unknown	Not Found	Out of Tolerance

## Sheet: 3h V1
Name	Quant Analyte	Retention Index	S/N	Area	Quant Mass	Retention Time	Type
Peak 1		999.4	1468	16333471	XIC(159.10±0.5)	300.749	Unknown
Peak 2		999.6	530	154668918	XIC(75.04±0.5)	300.966	Unknown
*Unknown#bth-pae-001_M000000_A097001-101-x1[NA]_NA_959,45_PRED_VAR5_ALK	*Unknown#bth-pae-001_M000000_A097001-101-x1[NA]_NA_959,45_PRED_VAR5_ALK	1000.1	8853	1411293679	XIC(77.03±0.5)	301.382	Out of Tolerance
Peak 4		1002	529	72423437	XIC(52.05±0.5)	303.192	Unknown
Peak 5		1003.7	1148	462348213	XIC(222.13±0.5)	304.775	Unknown
Ethylene glycol, 2TMS derivative	Ethylene glycol, 2TMS derivative	1004.6	8743	3607920546	XIC(147.08±0.5)	305.586	Match
Peak 7		1006.3	6709	10409162607	XIC(221.11±0.5)	307.182	Unknown
Peak 8		1006.9	20975	15324978937	XIC(73.06±0.5)	307.699	Unknown
Peak 9		1008.5	718	766460122	XIC(77.03±0.5)	309.151	Unknown
Decane, 2,2-dimethyl-	Decane, 2,2-dimethyl-	1011.3	1085	557146408	XIC(57.08±0.5)	311.761	Match
*Propylene glycol (2TMS)	*Propylene glycol (2TMS)	1016.9	9611	1331240893	XIC(73.06±0.5)	316.972	Out of Tolerance
Peak 12		1019.1	549	154978281	XIC(56.04±0.5)	318.985	Unknown
Peak 13		1021.8	1289	73374953	XIC(207.05±0.5)	321.502	Unknown
Cyclotetrasiloxane, octamethyl-	Cyclotetrasiloxane, octamethyl-	1024.4	1308	34389599	XIC(281.07±0.5)	323.914	Match
Peak 15		1026.7	1998	182930409	XIC(104.05±0.5)	325.985	Unknown
Tridecane	Tridecane	1027.2	566	118398013	XIC(57.09±0.5)	326.523	Out of Tolerance
Methoxyamine, TMS derivative	Methoxyamine, TMS derivative	1028.6	8439	1240677322	XIC(73.06±0.5)	327.802	Out of Tolerance
Peak 18		1030.2	2640	68914788	XIC(147.08±0.5)	329.293	Unknown
3-Carene	3-Carene	1030.7	668	112170289	XIC(93.08±0.5)	329.754	Match
*Nonane, 2,6-dimethyl-	*Nonane, 2,6-dimethyl-	1031.8	688	37044377	XIC(71.10±0.5)	330.784	Out of Tolerance
Peak 21		1033	2774	145891843	XIC(73.06±0.5)	331.85	Unknown
Peak 22		1034.4	1638	123044437	XIC(71.10±0.5)	333.128	Unknown
Peak 23		1040.1	624	11397655	XIC(136.07±0.5)	338.454	Unknown
Propylene glycol, 2TMS derivative	*D-Limonene	1045.8	769	17273622	XIC(68.07±0.5)	343.708	Out of Tolerance
Propylene glycol, 2TMS derivative	Propylene glycol, 2TMS derivative	1045.8	769	31810597	XIC(117.08±0.5)	343.708	Out of Tolerance
*Pyridine, 2-hydroxy- (1TMS)_M000413_A105003-101-xxx_NA_1031,31_TRUE_1031,17_MOSYS_PRED_VAR5_ALK	*Pyridine, 2-hydroxy- (1TMS)_M000413_A105003-101-xxx_NA_1031,31_TRUE_1031,17_MOSYS_PRED_VAR5_ALK	1048.3	7168	332244337	XIC(152.06±0.5)	346.006	Out of Tolerance
Peak 26		1048.8	1210	56309722	XIC(166.04±0.5)	346.48	Unknown
Peak 27		1049.7	3138	168144333	XIC(69.07±0.5)	347.32	Unknown
*Methyltris(trimethylsiloxy)silane	*Methyltris(trimethylsiloxy)silane	1052.2	2728	149613314	XIC(73.06±0.5)	349.627	Out of Tolerance
Peak 29		1057.7	670	79707874	XIC(73.06±0.5)	354.671	Unknown
Pyruvic acid (1MEOX) (1TMS)_M000071_A104002-101-xxx_NA_1037,28_TRUE_1065,40_MOSYS_TRUE_VAR5_ALK	Pyruvic acid (1MEOX) (1TMS)_M000071_A104002-101-xxx_NA_1037,28_TRUE_1065,40_MOSYS_TRUE_VAR5_ALK	1061.7	4739	767345453	XIC(73.06±0.5)	358.444	Match
*4-Trimethylsilylphenol	*4-Trimethylsilylphenol	1064.7	946	23708232	XIC(151.07±0.5)	361.169	Out of Tolerance
1,3-Propanediol, 2TMS derivative	5-(Piperidin-1-ylmethyl)-3-pyridin-3-yl-5,6-dihydro-4H-1,2,4-oxadiazine	1065.6	806	21917432	XIC(98.12±0.5)	362.01	Match
1,3-Propanediol, 2TMS derivative	1,3-Propanediol, 2TMS derivative	1065.6	806	110210044	XIC(147.08±0.5)	362.01	Match
Dodecane, 4,6-dimethyl-	Dodecane, 4,6-dimethyl-	1066.4	2893	538490245	XIC(71.10±0.5)	362.786	Match
*Methyltris(trimethylsiloxy)silane:2	*Methyltris(trimethylsiloxy)silane:2	1069.1	9263	756524605	XIC(73.06±0.5)	365.216	Match
Tridecane:2	Tridecane:2	1071.7	1335	184017483	XIC(57.09±0.5)	367.646	Out of Tolerance
Peak 36		1072.3	1810	21130961	XIC(234.13±0.5)	368.172	Unknown
Peak 37		1072.7	3046	1371244922	XIC(117.08±0.5)	368.55	Unknown
Peak 38		1073.2	1114	2107494359	XIC(73.05±0.5)	369.013	Unknown
Hexanoic acid, TMS derivative	Hexanoic acid, TMS derivative	1079.9	999	256615840	XIC(75.03±0.5)	375.258	Out of Tolerance
[truncated: 751 more rows]

[truncated: 16 more sheets: 3h V2, 3h V3, 3h V4, 6h V1, 6h V2, 6h V3, 6h V4, 3h C1, 3h C2, 3h C3, 3h C4, 6h C1, 6h C2, 6h C3, 6h C4, Medium]
